# Supplementary material for: Divalent Metal Transporter 1 Knock-Down Modulates IL-1β Mediated Pancreatic Beta-Cell Pro-Apoptotic Signaling Pathways through the Autophagic Machinery
Source: MDPI journal article supplement (doi:10.3390/ijms22158013), 2021-07-27
Supplement: s1 [file s1]

**Divalent Metal Transporter 1 knock-down modulates IL-1 $\beta$  mediated pancreatic beta-cell pro-apoptotic signaling pathways through the autophagic machinery**

Taewook Kang<sup>1,2</sup>, Honggang Huang<sup>1</sup>, Thomas Mandrup-Poulsen<sup>3</sup>, Martin R. Larsen<sup>1,\*</sup>

<sup>1</sup> Protein research group, Department of Biochemistry and Molecular Biology, University of Southern Denmark, 5230 Odense M, Denmark.

<sup>2</sup> The Danish Diabetes Academy, Odense, Denmark

<sup>3</sup> Immuno-endocrinology Laboratory, Department of Biomedical Sciences, University of Copenhagen, 2200 Copenhagen N, Denmark.

**\*Lead contact: Prof. Dr. Martin R. Larsen:**

Department of Biochemistry and Molecular Biology, the University of Southern Denmark, Denmark.

Tel.: 45-60-111872; E-mail: [mrl@bmb.sdu.dk](mailto:mrl@bmb.sdu.dk)

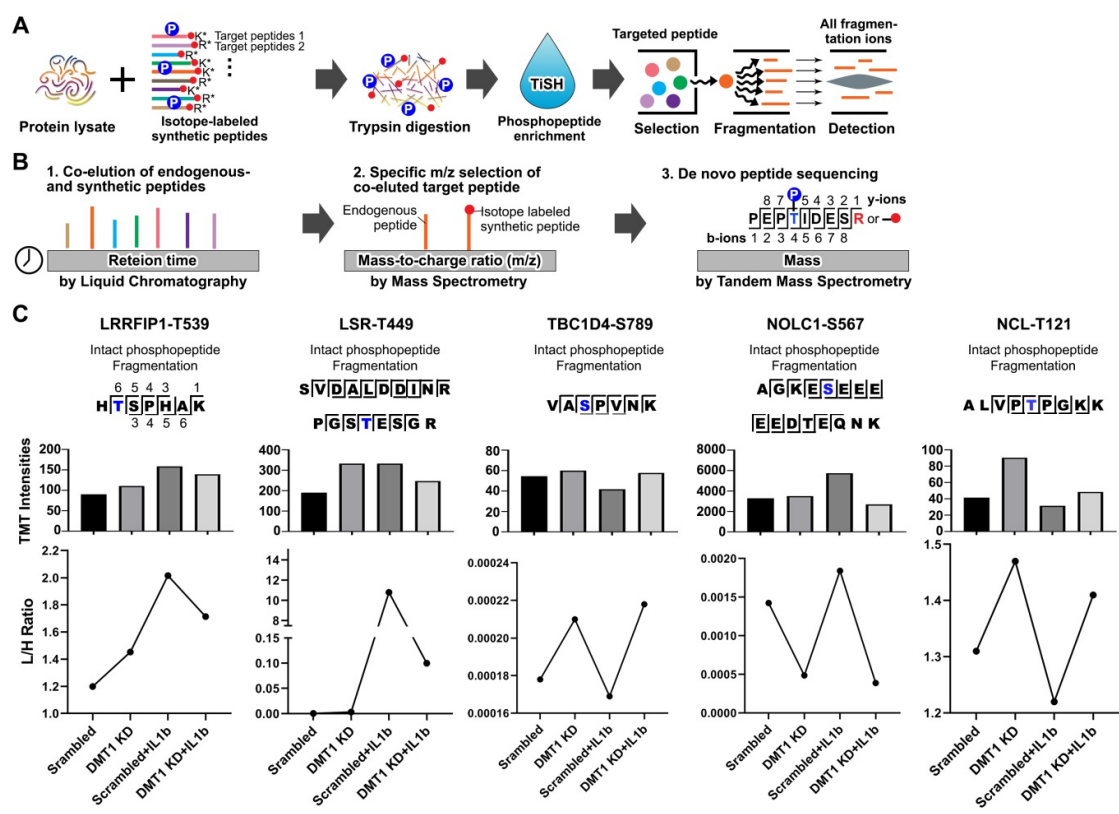

**Figure S1.** PRM analysis of the potential protective phosphoproteins against IL-1 $\beta$  by suppressing DMT1 in  $\beta$ -cells.
