# Supplementary material for: Divalent Metal Transporter 1 Knock-Down Modulates IL-1β Mediated Pancreatic Beta-Cell Pro-Apoptotic Signaling Pathways through the Autophagic Machinery
Source: Int J Mol Sci. 2021 Jul 27;22(15):8013. doi: 10.3390/ijms22158013 (PMC8348373; doi:10.3390/ijms22158013)
Supplement: Supplementary file 1 [file ijms-22-08013-s001.zip]

Archive with 7 entries (7 files):
- FigureS1.pdf
- Table S1.xlsx
- Table S2.xlsx
- Table S3.xlsx
- Table S4.xlsx
- Table S5.xlsx
- Table S6.xlsx
