# Supplementary material for: Divalent Metal Transporter 1 Knock-Down Modulates IL-1β Mediated Pancreatic Beta-Cell Pro-Apoptotic Signaling Pathways through the Autophagic Machinery
Source: Int J Mol Sci. 2021 Jul 27;22(15):8013. doi: 10.3390/ijms22158013 (PMC8348373; doi:10.3390/ijms22158013)
Supplement: Supplementary file 1 [file ijms-22-08013-s001.zip › Table S1.xlsx]

## Sheet: S1_Cover
Table S1.The list of significantly regulated proteins in both CON/CON-IL and SC-IL.
Divalent Metal Transporter 1 knock-down modulates IL-1β mediated pancreatic beta-cell pro-apoptotic signaling pathways through the autophagic machinery
Taewook Kang1,2, Honggang Huang1, Thomas Mandrup-Poulsen3, Martin R. Larsen1,*
1 Protein research group, Department of Biochemistry and Molecular Biology, University of Southern Denmark, 5230 Odense M, Denmark.
2 The Danish Diabetes Academy, Odense, Denmark
3 Immuno-endocrinology Laboratory, Department of Biomedical Sciences, University of Copenhagen, 2200 Copenhagen N, Denmark.
*Corresponding author: Prof. Dr. Martin R. Larsen:
Department of Biochemistry and Molecular Biology, the University of Southern Denmark, Denmark. Tel.: 45-60-111872; E-mail: mrl@bmb.sdu.dk

## Sheet: S1-Proteome
Master Protein Accessions	Description	Gene symbols	Log2 ratio: DMT1 KD/ Scrambled	Log2 ratio: (+IL-1b) DMT1 KD/ Scrambled	Log2 ratio: Scrambled/Scrambled+ IL-1b	Log2 ratio: Control/ Control+ IL-1b	Adjusted p-value: DMT1 KD/ Scrambled	Adjusted p-value: (+IL-1b) DMT1 KD/ Scrambled	Adjusted p-value:: Scrambled/Scrambled+ IL-1b	Adjusted p-value:: Control/ Control+ IL-1b	Control	Scrambled	DMT1 KD	Control +IL-1b	Scrambled +IL-1b	DMT1 KD +IL-1b	Coverage [%]	# Peptides	# PSMs	# Unique Peptides	Score Sequest HT: Sequest HT
Q62406	interleukin-1 receptor-associated kinase 1 [OS=Mus musculus]	Irak1	0.331786	0.175912	1.37733	1.27638	0.361438	0.243768	0	0	0.821028	0.794552	1	0.338945	0.305847	0.345508	1	1	1	1	2.79
Q80W03	TOX high mobility group box family member 3 [OS=Mus musculus]	Tox3	0.00384406	0.0798847	1.04444	0.813389	0.750518	0.636394	0	8.61082e-11	1	0.991608	0.994254	0.569044	0.480764	0.508136	8	4	13	1	49.99
Q9JIA3	NF-kappa-B inhibitor beta [OS=Rattus norvegicus]	Nfkbib	0.292954	0.00494716	0.968302	0.991422	0.452111	0.970635	0	0	0.859134	0.816229	1	0.432129	0.417181	0.418614	13	3	3	2	12.85
P13053	Vitamin D3 receptor [OS=Rattus norvegicus]	Vdr	-0.641881	0.29364	0.954414	0.804231	0.039615	0.0374822	0	1.60061e-10	0.86825	1	0.640877	0.497218	0.516051	0.632539	4	1	1	1	4.3
Q6Y1S1	Myeloid differentiation primary response protein MyD88 [OS=Rattus norvegicus]	Myd88	-0.012585	-0.158481	0.728353	0.323234	0.709481	0.288961	2.77447e-10	0.0272651	0.872606	1	0.991315	0.697453	0.603592	0.5408	2	1	1	1	2.47
P07808	Pro-neuropeptide Y [OS=Rattus norvegicus]	Npy; LOC100912228	-0.553744	0.0328051	0.64963	0.754414	0.0623786	0.881133	4.67024e-08	3.76664e-09	0.962513	1	0.68125	0.570565	0.637444	0.652104	30	4	5	4	14.42
P35739	High affinity nerve growth factor receptor [OS=Rattus norvegicus]	Ntrk1	0.186717	-0.148198	0.598286	0.57084	0.738643	0.31762	8.01077e-07	2.79934e-05	0.857356	0.878603	1	0.577194	0.580351	0.523695	3	2	2	2	6.14
P02091	Hemoglobin subunit beta-1 [OS=Rattus norvegicus]	Hbb	0.351555	-0.243743	0.587983	0.483251	0.319185	0.12111	1.35625e-06	0.000562488	0.761571	0.783739	1	0.544801	0.5214	0.440349	31	4	26	4	32.59
O08699	15-hydroxyprostaglandin dehydrogenase [NAD(+)] [OS=Rattus norvegicus]	Hpgd	0.572273	0.0992091	0.572483	0.394571	0.0443834	0.542857	2.91649e-06	0.00606674	0.641853	0.672556	1	0.488268	0.452266	0.484461	18	4	6	4	19.46
O09015	Max-interacting protein 1 [OS=Rattus norvegicus]	Mxi1	0.716818	0.507468	0.562141	0.769341	0.00571088	7.9587e-05	4.77819e-06	1.5171e-09	0.708561	0.608438	1	0.415702	0.412093	0.585812	6	1	2	1	8.42
Q9ESG3	Collectrin [OS=Rattus norvegicus]	Tmem27	-0.255992	-0.0231142	0.506872	0.372812	0.26586	0.82516	5.35028e-05	0.0099459	1	0.996929	0.834839	0.772276	0.701585	0.690434	18	4	10	4	35.06
Q64689	Sia-alpha-2,3-Gal-beta-1,4-GlcNAc-R:alpha 2,8-sialyltransferase [OS=Mus musculus]	St8sia3	-0.277907	0.096403	0.502858	0.380544	0.240654	0.556081	6.28774e-05	0.00837494	0.943948	1	0.824787	0.725092	0.705707	0.754475	17	6	11	6	36.67
P0CD94	Ubiquinol-cytochrome-c reductase complex assembly factor 3 [OS=Rattus norvegicus]	LOC686324; LOC690344; Uqcc3	0.296125	0.99063	0.501481	0.509886	0.444352	0	6.64296e-05	0.000243105	0.69494	0.712445	0.874771	0.488041	0.503258	1	8	1	1	1	2.45
Q5PPN4	carbonic anhydrase-related protein [OS=Rattus norvegicus]	Car8	-0.387363	-0.00342709	0.500574	0.34	0.14343	0.926597	6.88712e-05	0.0197318	0.841559	1	0.764526	0.664866	0.706826	0.705149	48	11	45	11	158.81
Q9D083-1	kinetochore protein SPC24 [OS=Mus musculus]	Spc24	0.0423187	0.339608	0.477661	0.336907	0.851159	0.0139539	0.000166266	0.0209723	0.923105	0.971093	1	0.730856	0.697382	0.882476	8	1	5	1	29.25
Q5RK03	CDKN2AIP N-terminal-like protein [OS=Rattus norvegicus]	Cdkn2aipnl	0.0466511	0.198114	0.476699	0.289248	0.86285	0.1827	0.000172314	0.0498426	1	0.950579	0.981819	0.818328	0.683105	0.783656	31	3	6	3	20.73
Q4V8B0-3	Isoform 3 of Oxidation resistance protein 1 [OS=Rattus norvegicus]	Oxr1	0.277171	0.0759414	0.441706	0.623711	0.49158	0.656125	0.00059193	3.18974e-06	0.981332	0.825208	1	0.636884	0.60757	0.640409	50	8	13	1	44.39
Q5DTT3	Protein FAM208B [OS=Mus musculus]	BC016423; Fam208b	0.683985	-0.145017	0.437834	0.502107	0.00970693	0.326895	0.000673322	0.000312577	0.70521	0.622444	1	0.497931	0.459514	0.41557	0	1	1	1	2.36
Q04887	transcription factor SOX-9 [OS=Mus musculus]	Sox9	0.227836	0.00818508	0.435347	0.453713	0.622796	0.987763	0.000730813	0.00132985	0.865248	0.853915	1	0.63177	0.631483	0.635076	9	5	5	5	14.8
Q9Z0F1	neuroendocrine secretory protein 55 [OS=Mus musculus]	Gnas	0.923616	-0.0143377	0.430467	0.345679	6.83195e-05	0.869953	0.000856793	0.0176139	0.554269	0.527186	1	0.436175	0.391183	0.387315	14	4	7	4	19.86
Q64610	Ectonucleotide pyrophosphatase/phosphodiesterase family member 2 [OS=Rattus norvegicus]	Enpp2	-0.0507003	-0.0248897	0.410511	0.403641	0.619297	0.816195	0.00160258	0.00488872	0.965222	1	0.965468	0.729658	0.752357	0.739488	25	20	41	20	147.64
Q80TG1-1	KAT8 regulatory NSL complex subunit 1 [OS=Mus musculus]	Kansl1	0.502589	-0.0384048	0.41039	0.660532	0.0942672	0.749171	0.00160847	5.87966e-07	0.756553	0.705839	1	0.478629	0.531087	0.517136	4	3	3	3	9.31
Q5M856	Kinetochore protein Spc25 [OS=Rattus norvegicus]	Spc25	0.117246	0.12013	0.405732	0.383013	0.939149	0.448732	0.00185135	0.00792071	0.893136	0.921946	1	0.684887	0.695934	0.756364	31	6	19	6	72.61
Q587K4	leucine-rich repeat-containing protein 73 [OS=Rattus norvegicus]	Lrrc73	0.0774169	0.146537	0.388796	0.345119	0.947624	0.342747	0.00303492	0.0178138	0.89133	0.947753	1	0.701693	0.723862	0.80125	7	2	3	2	10.3
Q9JJ94	Sjoegren syndrome nuclear autoantigen 1 homolog [OS=Mus musculus]	Ssna1	0.0662859	0.129635	0.386722	0.302165	0.916624	0.40883	0.00321853	0.0399495	0.948374	0.955094	1	0.769164	0.730518	0.799199	53	7	31	7	109.54
Q8BJ73-1	R-spondin-4 [OS=Mus musculus]	Rspo4	0.590891	0.0362815	0.371073	0.368966	0.0354378	0.86262	0.00495115	0.0108172	0.697733	0.663933	1	0.540281	0.513358	0.526432	3	1	2	1	3.67
P28075	proteasome subunit beta type-5 [OS=Rattus norvegicus]	Psmb5	-0.400623	0.0795766	0.348939	0.317162	0.134452	0.637928	0.00877934	0.0305214	0.841797	1	0.757531	0.675666	0.785161	0.829686	59	14	74	4	267.98
P01946	Hemoglobin subunit alpha-1/2 [OS=Rattus norvegicus]	Hba-a2; Hba1; Hba2	0.40017	-0.148198	0.340948	0.448518	0.227658	0.31762	0.0106872	0.0015359	0.920082	0.757769	1	0.674232	0.598276	0.53987	46	6	11	6	10.68
Q9Z2S7-4	Isoform 4 of TSC22 domain family protein 3 [OS=Mus musculus]	Tsc22d3	-0.0940802	-0.0310792	0.323037	0.301873	0.525839	0.785222	0.016295	0.0401539	1	0.844612	0.791291	0.811199	0.67517	0.660781	15	4	11	2	39.02
Q80TZ3	putative tyrosine-protein phosphatase auxilin [OS=Mus musculus]	Dnajc6	0.157466	0.0224394	0.32245	0.322954	0.822917	0.936416	0.0165148	0.0274085	0.943397	0.896599	1	0.754181	0.71702	0.728259	22	19	56	1	192.75
Q923K9-1	APOBEC1 complementation factor [OS=Rattus norvegicus]	A1cf	0.446805	-0.0543759	0.31115	0.294456	0.157097	0.673143	0.0212584	0.0456417	0.742752	0.733666	1	0.605625	0.591334	0.569461	3	2	6	1	21.6
Q6IMY1-1	Microtubule-associated tumor suppressor 1 homolog [OS=Rattus norvegicus]	Mtus1	0.39083	0.194874	0.310868	0.344814	0.243832	0.190881	0.0213899	0.0179236	0.774538	0.762691	1	0.609879	0.614848	0.70377	12	5	7	5	24.67
Q62764	Y-box-binding protein 3 [OS=Rattus norvegicus]	Csda; Ybx3	1.35809	-0.0785071	0.304811	0.312781	6.59695e-13	0.565978	0.0243873	0.0330645	0.372821	0.3901	1	0.300154	0.315804	0.299079	57	15	171	2	622.45
Q8BFR2	Follistatin-related protein 5 [OS=Mus musculus]	Fstl5	0.362927	-0.00612858	0.294086	0.303329	0.296166	0.912486	0.0305533	0.0391421	0.747714	0.777585	1	0.605933	0.63419	0.631502	3	3	3	2	6.75
O35405	Phospholipase D3 [OS=Mus musculus]	Pld3	-0.490888	0.162286	0.291007	0.403963	0.0858495	0.287115	0.032544	0.00485082	1	0.986464	0.701955	0.755779	0.806268	0.902262	12	7	18	1	58.73
P54751	CMP-N-acetylneuraminate-beta-galactosamide-alpha-2,3-sialyltransferase 1 [OS=Mus musculus]	St3gal1	-0.25965	-0.184844	0.290139	0.363048	0.261504	0.224394	0.0331239	0.0122858	1	0.983348	0.821381	0.77752	0.804205	0.707495	39	11	46	11	172.22
P26819	beta-adrenergic receptor kinase 2 [OS=Rattus norvegicus]	Adrbk2; Grk3	0.0563342	-0.0984648	0.289168	0.323032	0.889214	0.485234	0.0337828	0.0273687	0.950052	0.961705	1	0.759461	0.787034	0.73511	20	12	18	1	54.1
O08760	N-glycosylase/DNA lyase [OS=Mus musculus]	Ogg1	0.291945	-0.153194	0.287359	0.290498	0.454594	0.303445	0.0350392	0.0488074	0.770544	0.8168	1	0.630012	0.669287	0.601861	2	1	1	1	2.47
Q4G059	cell division cycle-associated 7-like protein [OS=Rattus norvegicus]	Cdca7l	0.205325	0.0670371	0.287289	0.402491	0.685697	0.701352	0.0350887	0.00502604	0.880223	0.867343	1	0.665934	0.710736	0.744541	11	4	48	4	142.7
P16290	phosphoglycerate mutase 2 [OS=Rattus norvegicus]	Pgam2	-0.434071	0.407387	0.28596	0.399137	0.114047	0.00237988	0.036037	0.00544595	1	0.88573	0.655591	0.758312	0.726472	0.963507	22	6	219	1	678.85
Q4G5Y1	kelch domain-containing protein 2 [OS=Mus musculus]	Klhdc2	0.0151678	-0.00383094	0.269699	0.37323	0.779506	0.924484	0.0494271	0.00985497	1	0.937632	0.947542	0.772052	0.777759	0.775696	12	4	6	4	19.14
Q00900	Human immunodeficiency virus type I enhancer-binding protein 2 homolog [OS=Rattus norvegicus]	Hivep2	0.337442	-0.0661657	-0.328807	-0.452563	0.349065	0.619548	0.0479056	0.0282277	0.730744	0.706659	0.892874	1	0.887546	0.84776	5	9	34	9	59.93
Q5M883	Chloride intracellular channel protein 2 [OS=Rattus norvegicus]	Clic2	0.140616	-0.0452231	-0.340884	-0.452076	0.871685	0.71626	0.0411381	0.0283779	0.73099	0.74246	0.81847	1	0.94035	0.911331	9	2	2	2	5.45
Q2TGI5	Probable palmitoyltransferase ZDHHC24 [OS=Rattus norvegicus]	Zdhhc24	-0.0144277	0.338485	-0.351636	-0.437545	0.704957	0.0143225	0.0358518	0.0332188	0.622736	0.619802	0.613635	0.843371	0.790872	1	3	1	1	1	2.28
P09450	transcription factor jun-B [OS=Mus musculus]	Junb	0.643159	-0.214944	-0.357851	-0.480491	0.0177621	0.165155	0.0330846	0.0207438	0.646686	0.640309	1	0.902269	0.820567	0.706984	9	2	3	1	9.9
Q4V8J2	Ubiquitin/ISG15-conjugating enzyme E2 L6 [OS=Rattus norvegicus]	Ube2l6	-0.0753933	-0.0460543	-0.358006	-0.418929	0.564862	0.712293	0.0330182	0.0405291	0.74798	0.766947	0.727897	1	0.982961	0.952078	61	6	23	6	94.79
Q8R5M4-1	Optineurin [OS=Rattus norvegicus]	Optn	0.382593	0.169648	-0.361344	-0.518538	0.258658	0.263139	0.0316164	0.0134959	0.695735	0.692079	0.902252	0.996642	0.88906	1	52	27	58	27	194.63
P25799	Nuclear factor NF-kappa-B p105 subunit [OS=Mus musculus]	Nfkb1	-0.0737532	-0.119503	-0.361744	-0.498832	0.568377	0.408408	0.031452	0.0168849	0.707679	0.778077	0.739299	1	0.999811	0.920331	14	9	16	7	63.28
P28064	Proteasome subunit beta type-8 [OS=Rattus norvegicus]	Psmb8	-0.0862339	0.274862	-0.362395	-0.518672	0.541994	0.0536686	0.031186	0.0134752	0.603787	0.642934	0.60563	0.865006	0.826529	1	16	4	11	4	39.93
O35103	osteomodulin [OS=Mus musculus]	Omd	0.459964	-0.876165	-0.36764	-0.513345	0.140223	1.0576e-05	0.0291185	0.0143206	0.700596	0.713574	0.981527	1	0.920682	0.5016	2	1	1	1	2.8
P26644	Beta-2-glycoprotein 1 [OS=Rattus norvegicus]	Apoh	0.347322	-1.01852	-0.370121	-0.452925	0.327996	9.9497e-07	0.0281845	0.0281162	0.73056	0.76942	0.978855	1	0.994446	0.490881	3	1	6	1	23.16
P63249	cAMP-dependent protein kinase inhibitor alpha [OS=Rattus norvegicus]	Pkia	0.4766	-0.292437	-0.37135	-0.765003	0.12074	0.0692004	0.0277321	0.000679524	0.588452	0.67584	0.940405	1	0.874242	0.713837	47	2	4	2	17.59
O54902-2	Isoform 1 of Natural resistance-associated macrophage protein 2 [OS=Rattus norvegicus]	Slc11a2	-0.223572	-0.481289	-0.384524	-0.588288	0.307193	0.00558269	0.0232841	0.00597589	0.665132	0.732012	0.626926	1	0.95559	0.684525	2	1	1	1	4.97
Q80X73	Protein pelota homolog [OS=Mus musculus]	Pelo	-0.885136	0.755294	-0.385053	-0.667901	0.0112148	8.97716e-11	0.0231201	0.00227959	0.445323	0.45365	0.245623	0.707511	0.592426	1	36	14	30	14	114
P02469	Laminin subunit beta-1 [OS=Mus musculus]	Lamb1	0.0435659	0.0369069	-0.387513	-0.480746	0.854518	0.859292	0.0223708	0.020685	0.716607	0.727645	0.749953	1	0.951859	0.976524	15	24	42	24	157.81
Q01728	Sodium/calcium exchanger 1 [OS=Rattus norvegicus]	Slc8a1	-0.130449	-0.242753	-0.393058	-0.574812	0.455352	0.12244	0.0207634	0.00701145	0.671374	0.720232	0.657966	1	0.94579	0.799316	23	16	50	1	186.59
Q9D8C4	Interferon-induced 35 kDa protein homolog [OS=Mus musculus]	Ifi35	-0.0289508	-0.0558164	-0.39444	-0.587152	0.669872	0.666474	0.0203797	0.00605722	0.665656	0.716533	0.702298	1	0.941834	0.906092	8	3	7	3	19.22
Q5QD51-1	A-kinase anchor protein 12 [OS=Rattus norvegicus]	Akap12	0.0184426	0.023178	-0.398549	-0.492155	0.787992	0.932477	0.0192773	0.0182045	0.710962	0.711304	0.720455	1	0.937628	0.952813	66	69	242	69	971.3
P97490	Adenylate cyclase type 8 [OS=Mus musculus]	Adcy8	0.497398	0.0230888	-0.399029	-0.538615	0.0991821	0.932953	0.0191522	0.0107102	0.688431	0.615964	0.869534	1	0.812222	0.825326	1	1	1	1	1.87
P97333	Neuropilin-1 [OS=Mus musculus]	Nrp1	-0.134731	0.0842245	-0.402226	-0.553773	0.447529	0.614911	0.0183378	0.00897839	0.659583	0.713779	0.650138	0.968215	0.943291	1	11	7	7	7	25.45
O35684	Neuroserpin [OS=Mus musculus]	Serpini1	0.0656503	0.144841	-0.404722	-0.50054	0.914864	0.349087	0.0177246	0.0165623	0.696281	0.683227	0.715036	0.985058	0.904479	1	13	6	12	1	40.39
Q9QXM0	Monoacylglycerol lipase ABHD2 [OS=Mus musculus]	Abhd2	0.116639	0.196388	-0.405796	-0.460519	0.940894	0.187028	0.0174665	0.0258737	0.65121	0.658756	0.714227	0.896089	0.872733	1	4	2	3	2	8.89
P23693	Troponin I, cardiac muscle [OS=Rattus norvegicus]	Tnni3	0.450992	-0.064348	-0.417104	-0.507976	0.151586	0.627661	0.0149536	0.0152233	0.703208	0.722062	0.987044	1	0.964129	0.922072	7	1	1	1	2.15
Q60766	Immunity-related GTPase family M protein 1 [OS=Mus musculus]	Irgm1	1.0001	-0.125255	-0.426758	-0.661774	7.50938e-06	0.388917	0.0130789	0.0024577	0.433785	0.499964	1	0.686259	0.672056	0.61617	2	1	1	1	3.36
Q68FT9	selenocysteine lyase [OS=Rattus norvegicus]	Scly	-0.154652	-0.127912	-0.438606	-0.633075	0.412441	0.380134	0.0110782	0.00348824	0.644801	0.70723	0.635339	1	0.958505	0.87718	19	7	12	7	42.89
Q62717	Calcium-dependent secretion activator 1 [OS=Rattus norvegicus]	Cadps	0.320433	-0.144778	-0.439223	-0.56395	0.386935	0.327599	0.0109823	0.00796895	0.676448	0.652019	0.814179	1	0.884056	0.799645	33	31	77	1	255.37
Q69ZL1	FYVE, RhoGEF and PH domain-containing protein 6 [OS=Mus musculus]	Fgd6	0.588472	0.0728171	-0.454101	-0.515599	0.0365115	0.671893	0.00889282	0.013957	0.699503	0.647835	0.974119	1	0.887488	0.933432	4	5	5	5	15.98
P59242	cingulin [OS=Mus musculus]	Cgn	0.210227	0.0832956	-0.456828	-0.491741	0.671876	0.619488	0.00855291	0.0182895	0.632058	0.687712	0.795594	0.888762	0.943899	1	13	16	23	16	72.65
P43406	Integrin alpha-V [OS=Mus musculus]	Itgav	0.165178	-0.0254595	-0.460363	-0.44308	0.800621	0.813325	0.00813062	0.0312915	0.735563	0.711468	0.797772	1	0.9789	0.961776	18	16	28	16	84.51
Q9QZW9	Motor neuron and pancreas homeobox protein 1 [OS=Mus musculus]	Mnx1	0.125145	-0.0903152	-0.463324	-0.497016	0.916395	0.517301	0.00779203	0.0172347	0.708571	0.673729	0.73478	1	0.92888	0.872513	23	7	48	7	169.08
O70513	Galectin-3-binding protein [OS=Rattus norvegicus]	Lgals3bp	-0.134286	0.0904027	-0.477517	-0.463504	0.448337	0.584785	0.00634598	0.0250386	0.663747	0.674589	0.614632	0.915231	0.939261	1	36	16	101	16	392.83
Q06000	lipoprotein lipase [OS=Rattus norvegicus]	Lpl	0.156512	-0.0703903	-0.478023	-0.640786	0.825676	0.60091	0.00629946	0.00317619	0.638158	0.717961	0.800231	0.995002	1	0.95238	22	8	14	8	60.85
A8IHN8	Uncharacterized protein C11orf96 homolog [OS=Rattus norvegicus]	RGD1564664	-0.166342	-0.309745	-0.479506	-0.509583	0.392845	0.0561524	0.0061649	0.0149477	0.683777	0.717223	0.639117	0.973451	1	0.806784	28	7	26	7	115.98
Q9R097	Kunitz-type protease inhibitor 1 [OS=Mus musculus]	Spint1	0.189926	-0.0354416	-0.490942	-0.593831	0.729463	0.76367	0.00521531	0.00559403	0.662581	0.635401	0.724805	1	0.892968	0.871299	4	2	3	2	9.26
Q8R3P2-2	Isoform 2 of Probable E3 ubiquitin-protein ligase DTX2 [OS=Mus musculus]	Dtx2	0.315885	-0.12087	-0.494276	-0.518794	0.397391	0.403717	0.00496577	0.0134564	0.697955	0.688594	0.857145	1	0.969964	0.892011	3	1	1	1	6.1
Q0QWG9-1	delphilin [OS=Mus musculus]	Grid2ip	0.336012	-0.0219992	-0.503932	-0.606598	0.352171	0.830807	0.00430555	0.00480156	0.656744	0.690421	0.871493	1	0.979068	0.964252	1	1	2	1	4.1
Q9D032-1	Single-stranded DNA-binding protein 3 [OS=Mus musculus]	Ssbp3	0.158708	0.108665	-0.512225	-0.515273	0.819324	0.499299	0.00380618	0.0140091	0.610634	0.650269	0.725887	0.872758	0.927446	1	23	7	18	4	58.84
O55005	Roundabout homolog 1 [OS=Rattus norvegicus]	Robo1	0.165714	-0.156856	-0.514416	-0.610752	0.799073	0.293356	0.00368378	0.00456787	0.654855	0.696784	0.781597	1	0.995298	0.89276	5	7	9	5	24.06
Q61581	Insulin-like growth factor-binding protein 7 [OS=Mus musculus]	Igfbp7	0.327936	0.0111625	-0.517769	-0.531448	0.369986	0.996448	0.0035037	0.0116354	0.69186	0.642521	0.806503	1	0.919923	0.927069	21	6	15	6	51.71
Q3UIR3-1	E3 ubiquitin-protein ligase DTX3L [OS=Mus musculus]	Dtx3l	0.115762	-0.00562635	-0.520683	-0.511393	0.943416	0.915105	0.0033541	0.0146428	0.689982	0.697042	0.755278	0.983518	1	0.996108	4	4	7	4	13.13
Q8BVI4	dihydropteridine reductase [OS=Mus musculus]	Qdpr; LOC102643271	-0.368553	0.83561	-0.52776	-0.75728	0.157101	1.3245e-13	0.00301578	0.000748979	0.391877	0.388673	0.30105	0.662389	0.560346	1	49	10	78	10	297.82
Q9DCK3	Tetraspanin-4 [OS=Mus musculus]	Tspan4	0.29551	0.256781	-0.531733	-0.749854	0.445854	0.0741021	0.00284044	0.000822322	0.496062	0.57894	0.710544	0.83419	0.836953	1	3	1	2	1	6.21
Q3KR97	Brain-specific angiogenesis inhibitor 1-associated protein 2-like protein 1 [OS=Rattus norvegicus]	Baiap2l1	0.0236998	-0.0744981	-0.534839	-0.439842	0.801708	0.583085	0.00271019	0.032406	0.700721	0.690236	0.701668	0.950497	1	0.949672	50	21	42	21	133.71
P17209	Myosin light chain 4 [OS=Rattus norvegicus]	Myl4	0.274279	-0.220525	-0.54064	-0.416434	0.49896	0.155716	0.00248215	0.0416135	0.676346	0.687466	0.831414	0.902668	1	0.858253	6	1	1	1	2.3
Q62667	major vault protein [OS=Rattus norvegicus]	Mvp	0.0129505	0.0110395	-0.552876	-0.497816	0.773787	0.997101	0.00206005	0.0170798	0.708178	0.67327	0.679341	1	0.987692	0.995279	81	54	454	54	1751.86
Q9DB20	ATP synthase subunit O, mitochondrial [OS=Mus musculus]	Atp5o; LOC100047429; LOC102641678	0.366079	0.187669	-0.561076	-0.445882	0.289957	0.209963	0.00181682	0.0303557	0.642814	0.595121	0.767019	0.875607	0.878023	1	34	6	87	6	321.98
Q66HF9	Leucine-rich repeat flightless-interacting protein 1 [OS=Rattus norvegicus]	Lrrfip1	0.420606	0.0367554	-0.562998	-0.542152	0.19465	0.860098	0.00176397	0.0102798	0.686746	0.633179	0.847503	1	0.935418	0.959555	42	22	43	21	155.77
Q9JM80	Phosphoprotein associated with glycosphingolipid-enriched microdomains 1 [OS=Rattus norvegicus]	Cbp; Pag1	0.775914	0.0758334	-0.563685	-0.709588	0.00197206	0.656669	0.00174542	0.00136099	0.611495	0.568871	0.974063	1	0.840813	0.886192	24	7	33	7	81.7
Q62417-2	Isoform 2 of Sorbin and SH3 domain-containing protein 1 [OS=Mus musculus]	Sorbs1	0.00451778	0.0435412	-0.56393	-0.59505	0.752227	0.82407	0.00173887	0.00551321	0.635899	0.656346	0.658405	0.960542	0.97027	1	36	23	75	22	272.74
Q8R5M8	Cell adhesion molecule 1 [OS=Mus musculus]	Cadm1	0.0932622	-0.443425	-0.569566	-0.661043	0.992296	0.00960051	0.00159427	0.00247982	0.632421	0.616337	0.657496	1	0.914691	0.672652	9	3	6	2	16.43
Q71F54	E3 ubiquitin-protein ligase SH3RF1 [OS=Rattus norvegicus]	Sh3rf1	0.115615	-0.00623887	-0.572875	-0.483246	0.943839	0.911911	0.00151485	0.0201159	0.715366	0.651223	0.705559	1	0.968684	0.964504	9	3	7	3	16.73
Q8K1B9	Polypeptide N-acetylgalactosaminyltransferase 18 [OS=Mus musculus]	Galnt18; Galntl4	-0.364726	0.257289	-0.57419	-0.632613	0.160023	0.073456	0.00148435	0.00350787	0.570177	0.561953	0.436422	0.883986	0.836659	1	13	4	4	4	15.56
F1M391	Stimulator of interferon genes protein [OS=Rattus norvegicus]	Tmem173	0.22083	-0.364348	-0.575654	-0.628988	0.64221	0.0281453	0.00145112	0.00366548	0.64663	0.609821	0.710688	1	0.908848	0.706012	2	1	1	1	3.34
Q9CYL5	Golgi-associated plant pathogenesis-related protein 1 [OS=Mus musculus]	Glipr2	0.0188466	-0.107297	-0.577688	-0.621489	0.789042	0.451926	0.00140612	0.00401352	0.608239	0.670037	0.678847	0.935753	1	0.928325	28	4	5	4	23.27
Q8VD31	Tapasin-related protein [OS=Mus musculus]	Tapbpl	-0.163023	0.0522667	-0.583281	-0.643201	0.398335	0.778048	0.00128923	0.00308417	0.622751	0.643696	0.574918	0.972606	0.96442	1	5	3	6	3	16.74
Q6IG12	Keratin, type II cytoskeletal 7 [OS=Rattus norvegicus]	Krt7	0.336333	-0.0245121	-0.587233	-0.546561	0.351473	0.818099	0.00121239	0.00976621	0.647607	0.665618	0.840372	0.945894	1	0.983153	21	9	26	5	78.98
Q62857	DNA damage-inducible transcript 3 protein [OS=Rattus norvegicus]	Ddit3	-0.76202	-0.380455	-0.588587	-0.795875	0.0212235	0.0227623	0.00118708	0.00045989	0.575994	0.617372	0.364046	1	0.928388	0.713183	11	2	3	2	7.7
Q9EQ25	Sodium-coupled neutral amino acid transporter 4 [OS=Rattus norvegicus]	Slc38a4	-0.059187	0.00879296	-0.600004	-0.613024	0.600225	0.990984	0.000993171	0.00444472	0.613916	0.655743	0.629386	0.938962	0.993924	1	7	4	19	4	68.39
P28077	Proteasome subunit beta type-9 [OS=Rattus norvegicus]	Psmb9	0.0644867	-0.0657727	-0.605072	-0.726161	0.911646	0.621298	0.000917279	0.00110676	0.60451	0.655128	0.685076	1	0.996486	0.952076	27	5	25	2	72.74
D3ZEN0	MICAL-like protein 2 [OS=Rattus norvegicus]	Micall2	0.348166	-0.0183905	-0.607563	-0.401421	0.32623	0.849174	0.000882077	0.0487163	0.693958	0.656304	0.835437	0.916585	1	0.987334	20	14	16	13	49.64
Q63199	Tumor necrosis factor receptor superfamily member 6 [OS=Rattus norvegicus]	Fas	0.544943	0.23039	-0.609311	-0.725854	0.0606168	0.114177	0.000858157	0.00111103	0.537151	0.558759	0.815209	0.888382	0.852405	1	5	1	1	1	4.41
Q9Z2K1	Keratin, type I cytoskeletal 16 [OS=Mus musculus]	Krt16	0.687822	-0.331513	-0.60973	-0.423445	0.0091426	0.0428746	0.000852525	0.0386318	0.671399	0.62079	1	0.900431	0.94731	0.752829	3	2	12	0	28.23
P07895	Superoxide dismutase [Mn], mitochondrial [OS=Rattus norvegicus]	Sod2	0.0419444	-0.122168	-0.613034	-0.652024	0.850152	0.399296	0.000809308	0.00276932	0.636387	0.653568	0.672849	1	0.999614	0.918451	80	13	184	13	705.33
Q4KM35	Proteasome subunit beta type-10 [OS=Rattus norvegicus]	Psmb10	0.115605	0.0215972	-0.626042	-0.747056	0.943867	0.940907	0.00065893	0.00085176	0.595818	0.612541	0.663644	1	0.945349	0.959608	41	9	33	9	117.17
Q2EMV9	poly [ADP-ribose] polymerase 14 [OS=Mus musculus]	Parp14	0.104928	-0.0550565	-0.6329	-0.543571	0.974478	0.669988	0.000590979	0.0101117	0.657193	0.644879	0.693529	0.957909	1	0.962557	4	7	11	7	30.52
O08564-1	Phospholipid phosphatase 1 [OS=Rattus norvegicus]	Ppap2a; Plpp1	-0.0387417	-0.049202	-0.640523	-0.425116	0.646807	0.697361	0.000523461	0.0379506	0.667319	0.64148	0.624483	0.895996	1	0.966471	14	4	14	4	55.55
Q9JKS4	LIM domain-binding protein 3 [OS=Mus musculus]	Ldb3	0.310421	-0.213316	-0.647053	-0.71623	0.410131	0.167995	0.000471656	0.00125289	0.608686	0.579064	0.718079	1	0.906794	0.782158	8	3	3	3	12.89
Q6AYC2	Immunity-related GTPase family M protein [OS=Rattus norvegicus]	Irgm	0.0540584	-0.115142	-0.654604	-0.864901	0.88299	0.42362	0.000417973	0.000190939	0.549084	0.598583	0.621438	1	0.94228	0.869998	31	9	18	9	71.6
Q9D3G5	syntaxin-11 [OS=Mus musculus]	Stx11	0.453026	-0.0661153	-0.663515	-0.660484	0.148958	0.619772	0.000362267	0.00249688	0.632666	0.59047	0.808299	1	0.935268	0.893374	3	1	1	1	2.97
Q03145	Ephrin type-A receptor 2 [OS=Mus musculus]	Epha2	0.250409	-0.160555	-0.668876	-0.463564	0.561444	0.283422	0.000332328	0.025022	0.699153	0.628997	0.748219	0.964093	1	0.894681	1	1	1	1	0
P36370	Antigen peptide transporter 1 [OS=Rattus norvegicus]	Tap1	0.0122907	0.112424	-0.672801	-0.766899	0.772089	0.48244	0.000311959	0.000663464	0.562387	0.580262	0.585226	0.956962	0.925033	1	18	9	16	8	59.22
Q61107	Guanylate-binding protein 4 [OS=Mus musculus]	Gbp3	0.0994336	0.08139	-0.6926	-0.798915	0.990158	0.628913	0.000226451	0.000442495	0.499476	0.584798	0.626525	0.868984	0.945147	1	2	1	4	1	14.04
P01898	H-2 class I histocompatibility antigen, Q10 alpha chain [OS=Mus musculus]	H2-Q10	0.413878	-0.0218545	-0.708431	-0.786845	0.205156	0.831541	0.000175039	0.00051563	0.57961	0.539259	0.718435	1	0.881164	0.867916	11	3	19	1	58.3
P02803	Metallothionein-1 [OS=Rattus norvegicus]	Mt1a; Mt1; LOC100125598	1.07553	-0.518381	-0.724488	-0.725503	5.88538e-07	0.00323458	0.000134646	0.00111591	0.563174	0.474497	1	0.931195	0.784018	0.547366	13	1	2	1	6.01
P36372	antigen peptide transporter 2 [OS=Rattus norvegicus]	Tap2	0.0291157	0.0131425	-0.734601	-0.8631	0.815954	0.98593	0.000114074	0.000195382	0.54977	0.553948	0.565241	1	0.921735	0.93017	17	9	16	8	55.19
Q9EPI1	Xylosyltransferase 1 [OS=Rattus norvegicus]	Xylt1	0.146126	-0.095962	-0.745804	-0.830226	0.855738	0.494947	9.48885e-05	0.000297198	0.562441	0.540177	0.597757	1	0.905828	0.847536	8	6	12	6	40.32
Q99P81	ATP-binding cassette sub-family G member 3 [OS=Mus musculus]	Abcg3	0.0532416	0.0878695	-0.772497	-0.731651	0.88076	0.59707	6.10788e-05	0.00103329	0.602214	0.543478	0.56391	1	0.928383	0.986684	3	2	3	2	9.27
Q8JZQ0-1	Macrophage colony-stimulating factor 1 [OS=Rattus norvegicus]	Csf1	0.113617	-0.068242	-0.774716	-0.816976	0.94958	0.610349	5.88761e-05	0.000351793	0.567631	0.559187	0.605005	1	0.956686	0.912487	10	4	4	4	12.85
P84109	Sorbin and SH3 domain-containing protein 1 [OS=Rattus norvegicus]	Sorbs1	0.264582	0.0297351	-0.781336	-1.05011	0.524015	0.8975	5.27616e-05	1.78457e-05	0.482933	0.550006	0.660715	1	0.945306	0.964992	60	4	15	4	55.13
P15978	Class I histocompatibility antigen, Non-RT1.A alpha-1 chain [OS=Rattus norvegicus]	RT1-EC2	-0.18799	0.111162	-0.806643	-0.734286	0.358467	0.488069	3.46553e-05	0.000999762	0.548424	0.529313	0.464646	0.912343	0.925842	1	37	10	45	6	151.37
P15314	interferon regulatory factor 1 [OS=Mus musculus]	Irf1	0.0744296	0.0929346	-0.809456	-0.726787	0.939271	0.572604	3.30701e-05	0.00109813	0.538112	0.534999	0.563325	0.890549	0.937614	1	2	1	1	1	2.88
P58252	Elongation factor 2 [OS=Mus musculus]	Eef2	0.0627119	1.00638	-0.815732	-0.790893	0.906746	0	2.97879e-05	0.000489865	0.340816	0.282806	0.29537	0.589662	0.497792	1	77	69	1717	68	6222.92
P46096	Synaptotagmin-1 [OS=Mus musculus]	Syt1	2.5804	0.436249	-0.836556	-0.901626	0	0.000989572	2.10455e-05	0.000119353	0.167935	0.167194	1	0.313731	0.298573	0.403993	19	8	20	4	56.61
P09034	Argininosuccinate synthase [OS=Rattus norvegicus]	Ass1	-0.00509518	-0.137205	-0.840325	-0.93968	0.728036	0.350501	1.97609e-05	7.32969e-05	0.513057	0.558518	0.556549	0.984097	1	0.909279	57	19	53	19	185.73
Q6WAY2	Phospholipid phosphatase-related protein type 1 [OS=Rattus norvegicus]	Lppr1; Plppr1	0.417067	-0.109364	-0.860847	-1.20134	0.200132	0.44435	1.40194e-05	2.64245e-06	0.43487	0.483575	0.645674	1	0.878222	0.814108	6	1	15	1	41.67
Q9QZC7-1	Pleckstrin homology domain-containing family B member 2 [OS=Mus musculus]	Plekhb2	0.166643	-0.100995	-0.897176	-1.09544	0.796391	0.475537	7.62508e-06	1.00245e-05	0.462411	0.536937	0.602681	0.988074	1	0.932389	11	2	2	2	6.69
P07174	Tumor necrosis factor receptor superfamily member 16 [OS=Rattus norvegicus]	Ngfr	0.0629581	0.0588828	-0.903311	-1.10554	0.907425	0.743471	6.87907e-06	8.81965e-06	0.464728	0.501416	0.523782	1	0.937826	0.976895	27	6	19	6	64.07
P16391	RT1 class I histocompatibility antigen, AA alpha chain [OS=Rattus norvegicus]	RT1-EC2	0.161458	-0.066699	-0.906793	-0.884331	0.811371	0.617179	6.48862e-06	0.00014893	0.541739	0.50982	0.570191	1	0.955847	0.912662	19	9	51	6	187.18
D3ZA76	Serine protease HTRA3 [OS=Rattus norvegicus]	Htra3	-0.401825	0.182388	-0.963167	-0.874939	0.133664	0.224738	2.51768e-06	0.000167942	0.458083	0.452016	0.342131	0.840092	0.881243	1	2	1	1	1	3.62
Q04863	Transcription factor RelB [OS=Mus musculus]	Relb	0.0863219	-0.000873439	-0.982582	-1.11018	0.972658	0.939981	1.81742e-06	8.31615e-06	0.463236	0.493689	0.52413	1	0.975529	0.974938	15	8	13	8	45.98
P58801	Receptor-interacting serine/threonine-protein kinase 2 [OS=Mus musculus]	Ripk2	-0.252099	0.138685	-1.02746	-1.04966	0.270564	0.372646	8.56486e-07	1.79472e-05	0.436557	0.44561	0.374168	0.903692	0.908347	1	19	8	19	7	71.72
Q0GNC1	Inverted formin-2 [OS=Mus musculus]	Inf2	-0.0219386	0.104611	-1.05047	-1.31495	0.686684	0.517778	5.82901e-07	6.51247e-07	0.40194	0.421387	0.415027	1	0.872777	0.938414	1	2	4	2	12.62
O35115	Four and a half LIM domains protein 2 [OS=Rattus norvegicus]	Fhl2	0.207884	-0.0588522	-1.08158	-0.82824	0.678475	0.652527	3.46879e-07	0.000304811	0.501189	0.472511	0.545747	0.88987	1	0.960028	9	3	5	3	14.77
Q8C4G9	Adhesion G protein-coupled receptor A1 [OS=Mus musculus]	Gpr123; Adgra1	0.353751	-0.213351	-1.14353	-1.16824	0.314666	0.167933	1.24117e-07	3.99904e-06	0.444964	0.392588	0.501679	1	0.86731	0.748083	1	1	1	1	1.88
Q9R233	Tapasin [OS=Mus musculus]	Tapbp	0.19836	-0.12561	-1.14431	-1.1179	0.70543	0.387736	1.22537e-07	7.54191e-06	0.460763	0.451703	0.518281	1	0.998445	0.915191	8	4	15	4	45.52
Q9WTK5	Nuclear factor NF-kappa-B p100 subunit [OS=Mus musculus]	Nfkb2	-0.058452	-0.0293555	-1.14687	-1.11586	0.601862	0.793803	1.17459e-07	7.73915e-06	0.420017	0.451603	0.433672	0.910279	1	0.979858	39	28	69	27	252.73
Q06518	Nitric oxide synthase, inducible [OS=Rattus norvegicus]	Nos2	0.050597	-0.100593	-1.23475	-1.20761	0.873556	0.47707	2.78448e-08	2.44392e-06	0.429037	0.424915	0.440082	0.990879	1	0.93265	20	19	27	19	76.91
Q9JJW1	tetraspanin-2 [OS=Rattus norvegicus]	Tspan2	0.124919	0.186579	-1.23974	-1.42969	0.917049	0.212959	2.56812e-08	1.64731e-07	0.340758	0.37208	0.405733	0.917961	0.878687	1	3	1	2	1	4.96
P18589	interferon-induced GTP-binding protein Mx2 [OS=Rattus norvegicus]	Mx2	0.0687368	-0.19732	-1.24829	-1.25393	0.92342	0.198066	2.23573e-08	1.37586e-06	0.366507	0.420947	0.441488	0.87408	1	0.872169	40	19	38	19	125.73
P63083	Protein S100-A5 [OS=Rattus norvegicus]	S100a5	0.0800682	0.190343	-1.25829	-1.5042	0.955057	0.202739	1.90192e-08	6.91585e-08	0.316321	0.366369	0.387277	0.8973	0.876397	1	52	4	8	4	28.55
Q62178	Semaphorin-4A [OS=Mus musculus]	Sema4a	0.031156	-0.0878389	-1.27304	-1.43305	0.821351	0.527294	1.49904e-08	1.58336e-07	0.370348	0.382943	0.391303	1	0.925463	0.870797	6	4	8	4	29.35
P48973	C-X-C motif chemokine 10 [OS=Rattus norvegicus]	Cxcl10	-0.0167595	0.0423927	-1.40244	-1.467	0.699255	0.830156	1.92997e-09	1.06393e-07	0.35059	0.367334	0.363092	0.969191	0.971043	1	32	2	2	2	10.38
P07151	Beta-2-microglobulin [OS=Rattus norvegicus]	B2m	0.349246	-0.219227	-1.4162	-1.16828	0.323976	0.157871	1.55862e-09	3.99713e-06	0.387059	0.374698	0.477326	0.869888	1	0.859026	45	5	45	4	169.06
P04223	H-2 class I histocompatibility antigen, K-K alpha chain [OS=Mus musculus]	H2-K1	0.48958	-0.0850778	-1.48671	-1.62949	0.10693	0.538572	5.28747e-10	1.68699e-08	0.323203	0.346893	0.48705	1	0.972163	0.91649	10	3	22	1	68.85
O08727	Tumor necrosis factor receptor superfamily member 11B [OS=Rattus norvegicus]	Tnfrsf11b	-0.16413	0.17137	-1.68131	-1.53959	0.396496	0.25772	3.05207e-11	4.61327e-08	0.284399	0.276878	0.247104	0.826784	0.887999	1	5	2	6	2	11.95
Q63264	Interleukin-1 beta [OS=Rattus norvegicus]	Il1b	0.912348	-0.381245	-1.68137	-1.57809	9.18785e-05	0.0225244	3.04941e-11	2.98672e-08	0.334926	0.283977	0.534475	1	0.910807	0.699295	3	1	1	1	1.87
Q00238	Intercellular adhesion molecule 1 [OS=Rattus norvegicus]	Icam1	0.190079	-0.629108	-1.81062	-1.8743	0.729028	0.000590827	5.14477e-12	1.29463e-09	0.27276	0.268948	0.306823	1	0.943455	0.610015	23	12	41	12	132.05
Q8R0L1-1	Signal-transducing adaptor protein 2 [OS=Mus musculus]	Stap2	0.484984	-0.15046	-1.81321	-1.89383	0.111683	0.311143	4.9698e-12	1.06677e-09	0.269092	0.266462	0.372932	1	0.936407	0.843668	3	1	2	1	7.72
Q6AYM7	Membrane-anchored junction protein [OS=Rattus norvegicus]	LOC499306; Majin; LOC100909430	-0.238188	0.0101439	-1.99232	-1.72759	0.287944	0.998147	4.95826e-13	5.84635e-09	0.300314	0.249574	0.211591	0.99456	0.992993	1	4	1	1	1	4.03
P15083	Polymeric immunoglobulin receptor [OS=Rattus norvegicus]	Pigr	0.421362	-0.0233259	-2.11968	-1.74689	0.193492	0.824089	1.07803e-13	4.76919e-09	0.27724	0.230097	0.308144	0.930509	1	0.983962	2	1	4	1	8.47

## Sheet: S1-PhosphoProteome
Annotated Sequence	Modifications	Qvality PEP	Qvality q-value	# Protein Groups	# Proteins	# Isoforms	# PSMs	Master Protein Accessions	Positions in Master Proteins	Modifications in Master Proteins	# Missed Cleavages	Theo. MH+ [Da]	Accession	Description	Gene symbols	Log2 ratio: DMT1 KD/ Scrambled	Log2 ratio: (+IL-1b) DMT1 KD/ Scrambled	Log2 ratio: Scrambled/Scrambled+ IL-1b	Log2 ratio: Control/ Control+ IL-1b	Adjusted p-value: DMT1 KD/ Scrambled	Adjusted p-value: (+IL-1b) DMT1 KD/ Scrambled	Adjusted p-value:: Scrambled/Scrambled+ IL-1b	Adjusted p-value:: Control/ Control+ IL-1b	Control	Scrambled	DMT1 KD	Control +IL-1b	Scrambled +IL-1b	DMT1 KD +IL-1b	Percolator q-Value (by Search Engine): Sequest HT	Percolator PEP (by Search Engine): Sequest HT	XCorr (by Search Engine): Sequest HT
[R].ANSTESVR.[N]	1xTMT6plex [N-Term]; 1xPhospho [S3(100)]	0.00269917	0.000587017	1	4	2	3	P97798-1	P97798-1 [1328-1335]	P97798-1 1xPhospho [S1330(100)]	0	1172.55	P97798-1	neogenin [OS=Mus musculus]	Neo1	-0.0194438	0.160508	0.967892	0.806884	0.246953	0.3085	0.0001	0.0005	0.877959	1	0.986613	0.501854	0.511253	0.571417	9.544e-05	0.0006886	2.63
[K].RPRSPGSNSK.[V]	1xTMT6plex [K10]; 1xTMT6plex [N-Term]; 1xPhospho [S4(100)]	0.00164462	0.00046153	2	8	1	27	Q9ESZ8-5; Q5U2Y1-2	Q9ESZ8-5 [612-621]; Q5U2Y1-2 [586-595]	Q9ESZ8-5 1xPhospho [S615(100)]; Q5U2Y1-2 1xPhospho [S589(100)]	1	1623.87	Q9ESZ8-5	Isoform 5 of General transcription factor II-I [OS=Mus musculus]	Gtf2i	0.527899	-0.562687	0.762333	0.543057	0.840433	0.0803	0.0002	0.0055	0.72969	0.693564	1	0.500797	0.408885	0.276832	6.971e-05	0.00036	3.32
[K].QGANSRPVNQTPPPEGEK.[L]	1xTMT6plex [K18]; 1xTMT6plex [N-Term]; 1xPhospho [T11(100)]	0.000405668	7.11143e-05	1	2	1	1	P07174	P07174 [284-301]	P07174 1xPhospho [T294(100)]	0	2444.23	P07174	Tumor necrosis factor receptor superfamily member 16 [OS=Rattus norvegicus]	Ngfr	0.426244	0.185616	-2.73021	-2.51761	0.516555	0.2536	0.0003	0.0009	0.151957	0.13251	0.178058	0.870154	0.879274	1	5.781e-05	0.0002159	2.84
[RK].HGTPQK.[HY]	1xTMT6plex [K6]; 1xTMT6plex [N-Term]; 1xPhospho [T3(100)]	0.0148438	0.00128835	1	3	1	5	P18588	P18588 [10-15]	P18588 1xPhospho [T12(100)]	0	1205.64	P18588	Interferon-induced GTP-binding protein Mx1 [OS=Rattus norvegicus]	Mx1	0.139697	-0.387231	-2.57625	-2.49055	0.0209983	0.2029	0.0004	0.001	0.161272	0.167676	0.184724	0.906333	1	0.764596	0.0004918	0.004702	2.24
[R].AGSHEGSDSSGGAALK.[A]	1xTMT6plex [K16]; 1xTMT6plex [N-Term]; 1xPhospho [S3(100)]	9.49924e-08	7.97536e-05	1	1	1	2	P14270	P14270 [12-27]	P14270 1xPhospho [S14(100)]	0	1968.94	P14270	cAMP-specific 3',5'-cyclic phosphodiesterase 4D [OS=Rattus norvegicus]	Pde4d	-0.117402	0.214213	0.739214	0.834368	0.407934	0.2038	0.0005	0.0004	1	0.880569	0.811749	0.560828	0.527519	0.611959	1.072e-05	2.058e-09	5.8
[K].TASIGTLGR.[S]	1xTMT6plex [N-Term]; 1xPhospho [T6(100)]	0.00243599	0.000525785	1	6	1	2	P97798-1	P97798-1 [1431-1439]	P97798-1 1xPhospho [T1436(100)]	0	1184.62	P97798-1	neogenin [OS=Mus musculus]	Neo1	0.151699	0.316643	0.732008	0.888728	0.00585889	0.0824	0.0006	0.0002	1	0.842849	0.936301	0.54009	0.50745	0.631993	8.648e-05	0.0006049	2.9
[R].SLSAPQDK.[G]	1xTMT6plex [K8]; 1xTMT6plex [N-Term]; 1xPhospho [S3(100)]	0.0129193	0.00128835	1	1	1	10	P58801	P58801 [362-369]	P58801 1xPhospho [S364(100)]	0	1383.73	P58801	Receptor-interacting serine/threonine-protein kinase 2 [OS=Mus musculus]	Ripk2	-0.245325	-0.6197	-2.15702	-2.22227	0.653451	0.06	0.0007	0.0012	0.212832	0.224219	0.189157	0.993131	1	0.650806	0.0004581	0.004101	2.59
[R].AGSQLGPGYQHHAQPK.[R]	1xTMT6plex [K16]; 1xTMT6plex [N-Term]; 1xPhospho [S3(100)]	0.0340882	0.00261652	1	1	1	2	E9Q5G3	E9Q5G3 [934-949]	E9Q5G3 1xPhospho [S936(100)]	0	2214.12	E9Q5G3	Kinesin-like protein KIF23 [OS=Mus musculus]	Kif23	0.660692	0.151976	0.684251	0.355191	1.28819	0.3281	0.0008	0.0316	0.594107	0.632575	1	0.464453	0.39367	0.437402	0.001086	0.01032	2.08
[K].SPGASNLK.[I]	1xTMT6plex [K8]; 1xTMT6plex [N-Term]; 1xPhospho [S1(100)]	0.00225665	0.000525785	1	1	1	6	Q9WTK5	Q9WTK5 [222-229]	Q9WTK5 1xPhospho [S222(100)]	0	1311.71	Q9WTK5	Nuclear factor NF-kappa-B p100 subunit [OS=Mus musculus]	Nfkb2	0.568303	-0.10273	-1.97459	-1.79051	0.9813	0.8293	0.0009	0.0022	0.273862	0.254443	0.377282	0.94739	1	0.931269	8.648e-05	0.0005473	2.58
[K].QGANSRPVNQTPPPEGEK.[L]	1xTMT6plex [K18]; 1xTMT6plex [N-Term]; 1xPhospho [T11(100)]	1.76298e-07	7.97536e-05	1	2	2	59	P07174	P07174 [284-301]	P07174 1xPhospho [T294(100)]	0	2444.23	P07174	Tumor necrosis factor receptor superfamily member 16 [OS=Rattus norvegicus]	Ngfr	0.154417	-0.165501	-1.96504	-2.009	0.00291956	0.6335	0.001	0.0015	0.241419	0.256132	0.285067	0.971718	1	0.891619	1.072e-05	4.398e-09	4.48
[K].LHSDSGISVDSQSLHDQQTHTQTASGQALK.[G]	1xTMT6plex [K30]; 1xTMT6plex [N-Term]; 4xPhospho [S5(100); S8(100); S11(100); S13(100)]	2.64397e-08	7.97536e-05	1	1	1	3	P07174	P07174 [302-331]	P07174 4xPhospho [S306(100); S309(100); S312(100); S314(100)]	0	3954.71	P07174	Tumor necrosis factor receptor superfamily member 16 [OS=Rattus norvegicus]	Ngfr	0.567882	-0.423139	-1.84666	-1.82345	0.977984	0.1672	0.0012	0.0019	0.282545	0.269944	0.40015	1	0.970901	0.724098	1.072e-05	4.283e-10	6.76
[K].TPGAIPSPTTQDDPK.[S]	1xTMT6plex [K15]; 1xTMT6plex [N-Term]; 1xPhospho [S7(100)]	0.00225665	0.000525785	1	1	2	4	Q06518	Q06518 [31-45]	Q06518 1xPhospho [S37(100)]	0	2063.05	Q06518	Nitric oxide synthase, inducible [OS=Rattus norvegicus]	Nos2	0.571921	-0.17887	-1.87939	-1.81104	0.996971	0.5953	0.0012	0.0021	0.284985	0.239987	0.356741	1	0.88296	0.780002	8.648e-05	0.0005455	2.39
[K].LHSDSGISVDSQSLHDQQTHTQTASGQALK.[G]	1xTMT6plex [K30]; 1xTMT6plex [N-Term]; 1xPhospho [S11(100)]	2.83068e-15	7.97536e-05	1	1	6	75	P07174	P07174 [302-331]	P07174 1xPhospho [S312(100)]	0	3714.81	P07174	Tumor necrosis factor receptor superfamily member 16 [OS=Rattus norvegicus]	Ngfr	0.556539	-0.122191	-1.82439	-1.68741	0.941574	0.7647	0.0013	0.0025	0.310485	0.270639	0.398038	1	0.958491	0.880653	1.072e-05	1.24e-18	9.42
[K].VRSFDHPGK.[D]	1xTMT6plex [K9]; 1xTMT6plex [N-Term]; 1xPhospho [S3(100)]	0.00889564	0.00109238	1	4	1	3	Q80YV4-1	Q80YV4-1 [61-69]	Q80YV4-1 1xPhospho [S63(100)]	1	1580.84	Q80YV4-1	pantothenate kinase 4 [OS=Mus musculus]	Pank4	-0.0708376	-0.223925	0.63585	0.799705	0.328272	0.4785	0.0014	0.0006	1	0.951152	0.905577	0.574467	0.612125	0.524121	0.0003256	0.002787	3.08
[K].VGESFEETLEETVVSTK.[K]	1xTMT6plex [K17]; 1xTMT6plex [N-Term]; 1xPhospho [S4(100)]	6.23131e-08	7.97536e-05	1	1	1	28	P23565	P23565 [471-487]	P23565 1xPhospho [S474(100)]	0	2422.2	P23565	alpha-internexin [OS=Rattus norvegicus]	Ina	-0.298938	-0.520804	0.634021	0.567809	0.75597	0.1018	0.0016	0.0042	1	0.906277	0.736668	0.674641	0.583985	0.407028	1.072e-05	1.224e-09	5.97
[K].VNAESVER.[I]	1xTMT6plex [N-Term]; 1xPhospho [S5(100)]	0.0042279	0.000769263	1	2	1	3	O08727	O08727 [232-239]	O08727 1xPhospho [S236(100)]	0	1212.58	O08727	Tumor necrosis factor receptor superfamily member 11B [OS=Rattus norvegicus]	Tnfrsf11b	0.265591	-0.260271	-1.79506	-1.84232	0.15453	0.3966	0.0017	0.0018	0.260806	0.288159	0.346404	0.935215	1	0.834931	0.000151	0.001201	2.54
[RK].QTPMASSPRPK.[M]	1xOxidation [M4]; 1xTMT6plex [K11]; 1xTMT6plex [N-Term]; 1xPhospho [S/T]	0.0256903	0.00221866	1	4	2	7	Q6P747	Q6P747 [150-160]		0	1753.91	Q6P747	Heterochromatin protein 1-binding protein 3 [OS=Rattus norvegicus]	Hp1bp3	0.0339516	-0.265893	0.610087	0.546426	0.160648	0.3853	0.0018	0.0054	0.898101	0.976741	1	0.614942	0.639919	0.53221	0.0008447	0.007953	2.42
[K].APGNSSQGK.[D]	1xTMT6plex [K9]; 1xTMT6plex [N-Term]; 1xPhospho [S6(100)]	0.00424712	0.000769263	1	1	2	5	Q9EPI1	Q9EPI1 [87-95]	Q9EPI1 1xPhospho [S92(100)]	0	1383.7	Q9EPI1	Xylosyltransferase 1 [OS=Rattus norvegicus]	Xylt1	-0.206147	0.425557	-1.65817	-1.51013	0.574466	0.0311	0.0019	0.0035	0.276575	0.235905	0.204494	0.787787	0.744551	1	0.000151	0.001209	2.63
[K].RTASNAEQYK.[Y]	1xTMT6plex [K10]; 1xTMT6plex [N-Term]; 1xPhospho [T/S/Y]	0.127254	0.00933521	1	2	1	1	Q8VH46	Q8VH46 [546-555]		1	1705.87	Q8VH46	actin filament-associated protein 1 [OS=Rattus norvegicus]	Afap1	-0.166775	0.330142	0.596845	0.622524	0.499489	0.0712	0.002	0.0028	0.945503	1	0.890832	0.614136	0.661198	0.831217	0.002865	0.03524	2.01
[K].LHSDSGISVDSQSLHDQQTHTQTASGQALK.[G]	1xTMT6plex [K30]; 1xTMT6plex [N-Term]; 2xPhospho [S8(98.6); S13(100)]	1.23226e-12	7.97536e-05	1	1	3	4	P07174	P07174 [302-331]	P07174 2xPhospho [S309(98.6); S314(100)]	0	3794.78	P07174	Tumor necrosis factor receptor superfamily member 16 [OS=Rattus norvegicus]	Ngfr	0.229201	-0.022354	-1.62	-1.4779	0.0949601	0.8803	0.0021	0.0036	0.347647	0.325335	0.381353	0.968345	1	0.984625	1.072e-05	2.113e-15	8.96
[R].TCSSTVK.[A]	1xCarbamidomethyl [C2]; 1xTMT6plex [K7]; 1xTMT6plex [N-Term]; 1xPhospho [S3(99)]	0.0990828	0.00715212	1	1	1	3	Q3UD82	Q3UD82 [321-327]	Q3UD82 1xPhospho [S323(99)]	0	1320.66	Q3UD82	Poly [ADP-ribose] polymerase 8 [OS=Mus musculus]	Parp8	-0.15937	-0.348726	-1.61705	-1.4777	0.486516	0.2461	0.0022	0.0037	0.359061	0.323848	0.289979	1	0.993396	0.780091	0.002274	0.02769	2
[R].RGSLPDTGWK.[H]	1xTMT6plex [K10]; 1xTMT6plex [N-Term]; 1xPhospho [S3(100)]	6.08384e-05	7.97536e-05	1	3	1	5	Q9QYP1	Q9QYP1 [1885-1894]	Q9QYP1 1xPhospho [S1887(100)]	1	1654.87	Q9QYP1	Low-density lipoprotein receptor-related protein 4 [OS=Rattus norvegicus]	Lrp4	0.00116954	-0.159709	-1.56538	-1.56043	0.214955	0.6499	0.0023	0.0031	0.333786	0.337889	0.338163	0.984472	1	0.895206	1.072e-05	5.663e-06	4.2
[R].SASVRLPASTVK.[L]	1xTMT6plex [K12]; 1xTMT6plex [N-Term]; 1xPhospho [S3(99)]	0.00285446	0.000587017	1	1	2	4	P57016	P57016 [403-414]	P57016 1xPhospho [S405(99)]	1	1754	P57016	Ladinin-1 [OS=Mus musculus]	Lad1	-0.147444	0.321731	0.582715	0.584828	0.465466	0.0783	0.0024	0.0038	0.98802	1	0.902849	0.658741	0.667706	0.834519	0.0001035	0.0007402	2.18
[K].SVSSASSDSEYK.[V]	1xTMT6plex [K12]; 1xTMT6plex [N-Term]; 1xPhospho [S9(99.3)]	2.73507e-05	7.97536e-05	1	1	2	4	P63157	P63157 [144-155]	P63157 1xPhospho [S152(99.3)]	0	1784.84	P63157	barH-like 1 homeobox protein [OS=Mus musculus]	Barhl1	0.277423	0.269322	0.580306	0.706135	0.17633	0.127	0.0026	0.0013	0.849778	0.825063	1	0.52088	0.55182	0.665077	1.072e-05	2.121e-06	3.48
[R].YGQLSGK.[V]	1xTMT6plex [K7]; 1xTMT6plex [N-Term]; 1xPhospho [S5(100)]	0.0236141	0.00193691	1	1	1	4	P56812	P56812 [80-86]	P56812 1xPhospho [S84(100)]	0	1290.69	P56812	Programmed cell death protein 5 [OS=Mus musculus]	Gm3837; Pdcd5-ps; Pdcd5	-0.118216	-0.559957	-1.5247	-1.73439	0.40927	0.0814	0.0027	0.0023	0.300536	0.309632	0.285272	1	0.890896	0.604315	0.0007914	0.007346	2.02
[R].RHSSQEQTFQLLK.[L]	1xTMT6plex [K13]; 1xTMT6plex [N-Term]; 1xPhospho [S3(99.2)]	0.00532593	0.000816232	1	2	2	3	O08727	O08727 [243-255]	O08727 1xPhospho [S245(99.2)]	1	2140.13	O08727	Tumor necrosis factor receptor superfamily member 11B [OS=Rattus norvegicus]	Tnfrsf11b	0.390111	-0.0412827	-1.52338	-1.70243	0.417369	0.9499	0.0028	0.0024	0.307269	0.29469	0.38619	1	0.847129	0.823232	0.0001905	0.001579	2.81
[R].TDSREDEISPPPPNPVVK.[G]	1xTMT6plex [K18]; 1xTMT6plex [N-Term]; 2xPhospho [S3(100); S9(100)]	1.4481e-07	7.97536e-05	1	2	2	17	P09456	P09456 [75-92]	P09456 2xPhospho [S77(100); S83(100)]	1	2595.25	P09456	cAMP-dependent protein kinase type I-alpha regulatory subunit [OS=Rattus norvegicus]	Prkar1a	-0.10241	-0.374624	0.574316	0.62804	0.384892	0.2167	0.0029	0.0027	0.914385	1	0.931475	0.591657	0.671605	0.518013	1.072e-05	3.443e-09	6.22
[R].MMSLSQSR.[S]	1xTMT6plex [N-Term]; 1xPhospho [S5(99.1)]	0.00992552	0.00109238	1	1	3	12	P58801	P58801 [172-179]	P58801 1xPhospho [S176(99.1)]	0	1248.57	P58801	Receptor-interacting serine/threonine-protein kinase 2 [OS=Mus musculus]	Ripk2	-0.0096092	0.292591	-1.49404	-1.44727	0.231362	0.1048	0.0031	0.004	0.266788	0.289849	0.287925	0.72751	0.816434	1	0.0003696	0.003132	2.32
[R].LYDSSPSR.[Q]	1xTMT6plex [N-Term]; 1xPhospho [S5(97.9)]	0.00966819	0.00109238	1	1	2	3	Q5DTV4	Q5DTV4 [757-764]	Q5DTV4 1xPhospho [S761(97.9)]	0	1233.57	Q5DTV4	Probable ribonuclease ZC3H12C [OS=Mus musculus]	Zc3h12c	0.262859	0.059695	0.564813	0.784851	0.151134	0.5924	0.0032	0.0007	0.931987	0.833435	1	0.540937	0.563438	0.58724	0.000362	0.003041	2.56
[K].DASSDTELDK.[C]	1xTMT6plex [K10]; 1xTMT6plex [N-Term]; 1xPhospho [S4(100)]	0.0030196	0.000587017	1	2	2	3	Q8CCH7-1	Q8CCH7-1 [431-440]	Q8CCH7-1 1xPhospho [S434(100)]	0	1618.76	Q8CCH7-1	Zinc finger protein ZFPM2 [OS=Mus musculus]	Zfpm2	0.148573	0.0380683	0.56248	0.373841	0.00988323	0.6639	0.0033	0.0263	0.861108	0.902142	1	0.664538	0.610874	0.627208	0.0001035	0.0007935	2.37
[K].RRSPSPKPTK.[V]	2xTMT6plex [K7; K10]; 1xTMT6plex [N-Term]; 2xPhospho [S3(100); S5(100)]	0.0100838	0.00114947	1	3	2	11	Q6AYK1	Q6AYK1 [153-162]	Q6AYK1 2xPhospho [S155(100); S157(100)]	2	2001.1	Q6AYK1	RNA-binding protein with serine-rich domain 1 [OS=Rattus norvegicus]	Rnps1	-1.84815	-0.299255	0.547364	0.532371	2.02228	0.3238	0.0035	0.0061	1	0.970525	0.269562	0.691418	0.6641	0.539696	0.0003853	0.003171	2.89
[K].LHSDSGISVDSQSLHDQQTHTQTASGQALK.[G]	1xTMT6plex [K30]; 1xTMT6plex [N-Term]; 3xPhospho [S8(100); S11(100); S13(99.9)]	9.93199e-09	7.97536e-05	1	1	1	2	P07174	P07174 [302-331]	P07174 3xPhospho [S309(100); S312(100); S314(99.9)]	0	3874.75	P07174	Tumor necrosis factor receptor superfamily member 16 [OS=Rattus norvegicus]	Ngfr	0.347681	-0.386157	-1.37315	-1.29719	0.317223	0.2043	0.0036	0.0058	0.406919	0.380451	0.484129	1	0.985504	0.754074	1.072e-05	1.291e-10	6.22
[R].DSNSPEPSSCR.[G]	1xCarbamidomethyl [C10]; 1xTMT6plex [N-Term]; 1xPhospho [S4(100)]	0.000907668	7.97536e-05	1	1	1	10	Q66HF9	Q66HF9 [345-355]	Q66HF9 1xPhospho [S348(100)]	0	1544.62	Q66HF9	Leucine-rich repeat flightless-interacting protein 1 [OS=Rattus norvegicus]	Lrrfip1	0.315162	-0.467987	-1.37227	-1.15577	0.250418	0.1327	0.0037	0.008	0.404216	0.386284	0.480596	0.900607	1	0.722973	1.072e-05	0.0001651	2.66
[R].NSSYASQQSK.[L]	1xTMT6plex [K10]; 1xTMT6plex [N-Term]; 1xPhospho [S3(99.2)]	0.000401201	7.97536e-05	1	1	1	2	Q78T81	Q78T81 [230-239]	Q78T81 1xPhospho [S232(99.2)]	0	1637.79	Q78T81	Protein FAM102A [OS=Mus musculus]	Fam102a	0.201074	0.10755	0.535179	0.662999	0.0566044	0.4443	0.0038	0.0017	1	0.822339	0.945323	0.631564	0.567474	0.611395	1.072e-05	5.823e-05	2.82
[R].GNSDGYIIPINK.[E]	1xTMT6plex [K12]; 1xTMT6plex [N-Term]; 1xPhospho [S3(100)]	0.000474838	7.97536e-05	1	9	1	2	O88923-1	O88923-1 [1447-1458]	O88923-1 1xPhospho [S1449(100)]	0	1828.96	O88923-1	Isoform 2 of Adhesion G protein-coupled receptor L2 [OS=Rattus norvegicus]	Lphn2; Adgrl2	0.093557	0.346826	0.522407	0.690958	0.0773264	0.0615	0.004	0.0014	0.918069	0.937209	1	0.568691	0.652494	0.829815	1.072e-05	7.192e-05	3.38
[K].DSGSPLQFDYK.[A]	1xTMT6plex [K11]; 1xTMT6plex [N-Term]; 1xPhospho [S4(100)]	0.000781519	7.97536e-05	1	1	1	1	Q91YK2	Q91YK2 [284-294]	Q91YK2 1xPhospho [S287(100)]	0	1794.87	Q91YK2	Ribosomal RNA processing protein 1 homolog B [OS=Mus musculus]	Rrp1b	0.229643	0.147477	0.520947	0.391385	0.0959339	0.3367	0.0041	0.022	0.905396	0.852846	1	0.690271	0.59436	0.658332	1.072e-05	0.0001356	2.96
[R].DLTEHKPSTSSHNLGPSDDSPNK.[V]	2xTMT6plex [K6; K23]; 1xTMT6plex [N-Term]; 1xPhospho [S/T]	4.55265e-08	7.97536e-05	1	1	2	8	P16573	P16573 [460-482]		0	3230.59	P16573	Carcinoembryonic antigen-related cell adhesion molecule 1 [OS=Rattus norvegicus]	Ceacam1	0.184975	-0.585108	-1.31188	-1.34786	0.0354104	0.0705	0.0042	0.0051	0.368256	0.402795	0.457897	0.937339	1	0.6666	1.072e-05	8.354e-10	5.17
[K].TFNSPNLK.[D]	1xTMT6plex [K8]; 1xTMT6plex [N-Term]; 1xPhospho [S4(100)]	0.00245683	0.000525785	1	2	1	9	O55005	O55005 [1052-1059]	O55005 1xPhospho [S1055(100)]	0	1458.78	O55005	Roundabout homolog 1 [OS=Rattus norvegicus]	Robo1	0.000684307	-0.253464	-1.29018	-1.5395	0.216025	0.4105	0.0043	0.0034	0.344004	0.368349	0.368524	1	0.900832	0.755689	8.648e-05	0.0006104	2.94
[R].RPLSPGK.[D]	1xTMT6plex [K7]; 1xTMT6plex [N-Term]; 1xPhospho [S4(100)]	0.0576393	0.00447911	1	2	1	9	Q00900	Q00900 [2106-2112]	Q00900 1xPhospho [S2109(100)]	0	1292.75	Q00900	Human immunodeficiency virus type I enhancer-binding protein 2 homolog [OS=Rattus norvegicus]	Hivep2	1.26589	-0.12395	-1.27852	-0.940772	2.50864	0.7579	0.0044	0.0161	0.475508	0.412217	0.991285	0.912765	1	0.917671	0.001579	0.01669	1.91
[R].DISPEEIDLK.[N]	1xTMT6plex [K10]; 1xTMT6plex [N-Term]; 1xPhospho [S3(100)]	0.00048574	7.97536e-05	1	2	1	4	Q62417	Q62417 [343-352]	Q62417 1xPhospho [S345(100)]	0	1696.88	Q62417	Sorbin and SH3 domain-containing protein 1 [OS=Mus musculus]	Sorbs1	0.0994336	-0.100133	-1.25917	-1.12056	0.0700194	0.8402	0.005	0.0089	0.44242	0.417785	0.447596	0.961961	1	0.932947	1.072e-05	7.411e-05	3.74
[K].SGGGGSPETK.[S]	1xTMT6plex [K10]; 1xTMT6plex [N-Term]; 1xPhospho [S6(100)]	0.000235475	7.97536e-05	1	2	1	13	Q9EPI1	Q9EPI1 [106-115]	Q9EPI1 1xPhospho [S111(100)]	0	1414.7	Q9EPI1	Xylosyltransferase 1 [OS=Rattus norvegicus]	Xylt1	-0.480578	-0.315849	-1.23598	-1.36033	1.07212	0.296	0.0051	0.0048	0.389494	0.405448	0.290581	1	0.955001	0.767226	1.072e-05	2.999e-05	3.64
[R].KRSHPSGGSTK.[K]	2xTMT6plex [K1; K11]; 1xTMT6plex [N-Term]; 1xPhospho [S3(100)]	0.00047917	7.97536e-05	1	2	1	3	A0MZ67	A0MZ67 [379-389]	A0MZ67 1xPhospho [S381(100)]	2	1909.06	A0MZ67	Shootin-1 [OS=Rattus norvegicus]	RGD1311558; Shtn1	-0.199565	0.204158	0.497395	0.556266	0.561299	0.221	0.0052	0.005	0.892446	1	0.870813	0.606917	0.708385	0.816069	1.072e-05	7.288e-05	3.05
[R].YSIVSSEEDGMK.[L]	1xTMT6plex [K12]; 1xTMT6plex [N-Term]; 1xPhospho [S5(98.9)]	0.00840639	0.00104516	1	2	1	1	Q64273	Q64273 [9-20]	Q64273 1xPhospho [S13(98.9)]	0	1882.89	Q64273	Inward rectifier potassium channel 2 [OS=Rattus norvegicus]	Kcnj2	0.786339	0.0348682	-1.22655	-1.21381	1.58004	0.6756	0.0053	0.0068	0.431128	0.369992	0.638123	1	0.865806	0.886987	0.0003191	0.002622	2.55
[R].SCSPASSEATAAPGDR.[L]	1xCarbamidomethyl [C2]; 1xTMT6plex [N-Term]; 1xPhospho [S3(100)]	4.89527e-07	7.97536e-05	1	1	1	7	Q9QZW9	Q9QZW9 [58-73]	Q9QZW9 1xPhospho [S60(100)]	0	1872.8	Q9QZW9	Motor neuron and pancreas homeobox protein 1 [OS=Mus musculus]	Mnx1	0.444404	-0.198523	-1.22417	-0.995412	0.568636	0.5384	0.0054	0.013	0.434339	0.428045	0.582463	0.865921	1	0.871442	1.072e-05	1.532e-08	4.19
[R].SISTVDLTEK.[S]	1xTMT6plex [K10]; 1xTMT6plex [N-Term]; 1xPhospho [S3(100)]	0.000217685	7.97536e-05	1	3	1	12	Q3KR97	Q3KR97 [421-430]	Q3KR97 1xPhospho [S423(100)]	0	1630.87	Q3KR97	Brain-specific angiogenesis inhibitor 1-associated protein 2-like protein 1 [OS=Rattus norvegicus]	Baiap2l1	0.255963	-0.406995	-1.22324	-0.994984	0.138346	0.1808	0.0055	0.0132	0.448529	0.42832	0.511471	0.893945	1	0.754192	1.072e-05	2.718e-05	4.2
[K].RSQSLDSR.[L]	1xTMT6plex [N-Term]; 1xPhospho [S4(100)]	0.00478406	0.000816232	1	2	1	7	P59242	P59242 [205-212]	P59242 1xPhospho [S208(100)]	1	1257.62	P59242	cingulin [OS=Mus musculus]	Cgn	-0.0932115	-0.117123	-1.21414	-1.33799	0.368658	0.7828	0.0056	0.0052	0.367714	0.43103	0.404062	0.929577	1	0.922024	0.0001672	0.001397	2.78
[R].RHTLGGPR.[S]	1xTMT6plex [N-Term]; 1xPhospho [T3(100)]	0.00580073	0.000816232	1	5	1	2	A2AQ25-1	A2AQ25-1 [66-73]	A2AQ25-1 1xPhospho [T68(100)]	1	1202.64	A2AQ25-1	Sickle tail protein [OS=Mus musculus]	Etl4	0.466349	-0.620179	-1.20265	-0.735139	0.641684	0.0598	0.0057	0.0385	0.515656	0.434476	0.600276	0.85834	1	0.65059	0.0002055	0.001742	2.69
[K].RSSPLPAK.[C]	1xTMT6plex [K8]; 1xTMT6plex [N-Term]; 1xPhospho [S3(99.4)]	0.00363021	0.000710363	1	1	1	4	Q80TT2	Q80TT2 [213-220]	Q80TT2 1xPhospho [S215(99.4)]	1	1393.8	Q80TT2	BAI1-associated protein 3 [OS=Mus musculus]	Baiap3	0.374416	0.587168	0.48418	0.500823	0.380802	0.0068	0.0058	0.0079	0.863617	0.771418	1	0.610321	0.551489	0.828499	0.000135	0.0009991	2.76
[K].KTSFDENDSEELEDK.[D]	2xTMT6plex [K1; K15]; 1xTMT6plex [N-Term]; 1xPhospho [S9(100)]	8.50935e-09	7.97536e-05	1	2	3	23	B2GUV7	B2GUV7 [106-120]	B2GUV7 1xPhospho [S114(100)]	1	2553.22	B2GUV7	Eukaryotic translation initiation factor 5B [OS=Rattus norvegicus]	Eif5b	-0.127003	-0.264458	0.476356	0.961266	0.426664	0.3878	0.006	0.0001	1	0.852043	0.780243	0.513606	0.612441	0.509864	1.072e-05	1.072e-10	5.49
[R].HAGGDSQK.[D]	1xTMT6plex [K8]; 1xTMT6plex [N-Term]; 1xPhospho [S6(100)]	0.00553107	0.000816232	1	1	1	2	Q9R0C5	Q9R0C5 [98-105]	Q9R0C5 1xPhospho [S103(100)]	0	1337.66	Q9R0C5	N-acetylgalactosaminyltransferase 7 [OS=Rattus norvegicus]	Galnt7	-0.121211	-0.00230361	-1.14624	-1.20499	0.415443	0.8049	0.0065	0.0069	0.433772	0.436286	0.401129	1	0.965662	0.964121	0.000198	0.00165	2.34
[R].HSEETEEERSYEGAK.[G]	1xTMT6plex [K15]; 1xTMT6plex [N-Term]; 2xPhospho [T5(100); S10(100)]	0.00020881	7.97536e-05	1	1	1	1	O35314	O35314 [396-410]	O35314 2xPhospho [T400(100); S405(100)]	1	2399.02	O35314	Secretogranin-1 [OS=Rattus norvegicus]	Chgb	0.23849	-0.550438	-1.14339	-1.14631	0.111203	0.0863	0.0066	0.0083	0.451778	0.439381	0.518363	1	0.970592	0.662733	1.072e-05	2.584e-05	4.73
[K].SLSTEVEPK.[E]	1xTMT6plex [K9]; 1xTMT6plex [N-Term]; 1xPhospho [S3(100)]	0.00272245	0.000587017	1	1	1	7	Q6ZPJ0	Q6ZPJ0 [193-201]	Q6ZPJ0 1xPhospho [S195(100)]	0	1527.81	Q6ZPJ0	Testis-expressed protein 2 [OS=Mus musculus]	Tex2	-0.0512362	-0.252732	0.467941	0.335889	0.296021	0.4121	0.0067	0.0378	0.944185	1	0.965109	0.748074	0.722996	0.606814	9.544e-05	0.0006959	2.63
[K].TIGGGDDSFNTFFSETGAGK.[H]	1xTMT6plex [K20]; 1xTMT6plex [N-Term]; 1xPhospho [S8(100)]	2.39625e-08	7.97536e-05	2	5	3	21	P05213; P68373	P05213 [41-60]; P68373 [41-60]	P05213 1xPhospho [S48(100)]; P68373 1xPhospho [S48(100)]	0	2546.19	P05213	Tubulin alpha-1B chain [OS=Mus musculus]	Tuba1b	0.548732	0.654543	0.467921	0.535353	0.915424	0.0035	0.0068	0.0059	0.770849	0.683621	1	0.531878	0.494262	0.778026	1.072e-05	3.802e-10	4.39
[R].NRSAEEGEVTESK.[S]	1xTMT6plex [K13]; 1xTMT6plex [N-Term]; 1xPhospho [S3(100)]	8.4462e-06	7.97536e-05	1	1	1	28	P58871	P58871 [1655-1667]	P58871 1xPhospho [S1657(100)]	1	1973.96	P58871	182 kDa tankyrase-1-binding protein [OS=Mus musculus]	Tnks1bp1	-0.135469	-0.143043	-1.12637	-0.77842	0.441291	0.7006	0.007	0.0324	0.535616	0.458068	0.417013	0.918716	1	0.905607	1.072e-05	5.025e-07	4.43
[K].EYPGQGVKPTHLDPDSDSGHGSYDSHSLLSEK.[C]	2xTMT6plex [K8; K32]; 1xTMT6plex [N-Term]; 2xPhospho [S27(100); S30(100)]	2.31859e-06	7.97536e-05	1	2	1	1	Q08501	Q08501 [327-358]	Q08501 2xPhospho [S353(100); S356(100)]	0	4286.99	Q08501	Prolactin receptor [OS=Mus musculus]	Prlr	-0.0984461	0.315349	0.462332	0.467159	0.378305	0.0838	0.0071	0.0106	0.947717	1	0.934039	0.685567	0.725812	0.903137	1.072e-05	1.031e-07	5.81
[K].KSPEKPESSSQPVTSSAEQYNANLANLK.[T]	3xTMT6plex [K1; K5; K28]; 1xTMT6plex [N-Term]; 1xPhospho [S2(100)]	0.000543952	7.97536e-05	1	2	1	5	Q9Z2U2-1	Q9Z2U2-1 [2026-2053]	Q9Z2U2-1 1xPhospho [S2027(100)]	1	4001.1	Q9Z2U2-1	zinc finger protein 292 [OS=Mus musculus]	Zfp292	0.106724	-0.0593886	0.454806	0.358557	0.0611302	0.9842	0.0074	0.0308	0.908707	0.928695	1	0.708741	0.677584	0.650257	1.072e-05	8.535e-05	4.62
[K].LSSPVPTQR.[L]	1xTMT6plex [N-Term]; 1xPhospho [S3(100)]	0.0218539	0.00183926	1	1	1	1	D3ZEN0	D3ZEN0 [142-150]	D3ZEN0 1xPhospho [S144(100)]	0	1293.68	D3ZEN0	MICAL-like protein 2 [OS=Rattus norvegicus]	Micall2	-0.290882	-0.0583602	-1.0986	-0.911919	0.739929	0.9887	0.0075	0.0182	0.470473	0.466971	0.381703	0.885217	1	0.960355	0.0007172	0.006821	2.44
[R].SANPAGAGSR.[S]	1xTMT6plex [N-Term]; 1xPhospho [S9(100)]	0.0356151	0.0026668	2	2	1	2	Q80TV8-2; Q80TV8-1	Q80TV8-2 [676-685]; Q80TV8-1 [676-685]	Q80TV8-2 1xPhospho [S684(100)]; Q80TV8-1 1xPhospho [S684(100)]	0	1196.56	Q80TV8-2	Isoform 2 of CLIP-associating protein 1 [OS=Mus musculus]	Clasp1	-0.623248	0.341225	0.44973	0.371862	1.28316	0.0646	0.0076	0.0269	0.911614	1	0.649208	0.704481	0.73218	0.927549	0.001115	0.01073	2.22
[K].SKSEEAHAEDSVMDHHFR.[K]	1xOxidation [M13]; 1xTMT6plex [K2]; 1xTMT6plex [N-Term]; 1xPhospho [S]	1.33023e-05	7.97536e-05	2	5	3	22	Q6AXS5-2; Q6AXS5	Q6AXS5-2 [312-329]; Q6AXS5 [327-344]		1	2666.21	Q6AXS5-2	Isoform 2 of Plasminogen activator inhibitor 1 RNA-binding protein [OS=Rattus norvegicus]	Serbp1	0.115192	-0.490572	0.445411	0.60573	0.051196	0.1179	0.0079	0.0032	0.896737	0.923259	1	0.58928	0.678019	0.482575	1.072e-05	8.752e-07	5.62
[R].ATTLSNAVSSLASTGLSLTK.[V]	1xTMT6plex [K20]; 1xTMT6plex [N-Term]; 1xPhospho [S5(98.4)]	1.88249e-07	7.97536e-05	1	8	4	8	O55012	O55012 [299-318]	O55012 1xPhospho [S303(98.4)]	0	2460.34	O55012	Phosphatidylinositol-binding clathrin assembly protein [OS=Rattus norvegicus]	Picalm	-0.0230504	-0.626789	-1.06965	-1.13416	0.252744	0.0577	0.0081	0.0086	0.455599	0.447351	0.440261	1	0.938955	0.608082	1.072e-05	4.741e-09	5.37
[R].HPTQEGEQER.[L]	1xTMT6plex [N-Term]; 1xPhospho [T3(100)]	0.000868738	7.97536e-05	1	1	1	5	Q5RKH7	Q5RKH7 [350-359]	Q5RKH7 1xPhospho [T352(100)]	0	1519.67	Q5RKH7	Solute carrier family 35 member F6 [OS=Rattus norvegicus]	RGD1309228; Slc35f6	0.430948	0.480486	-1.04534	-1.03768	0.529002	0.0185	0.0083	0.0116	0.329918	0.347282	0.468177	0.677299	0.716736	1	1.072e-05	0.0001558	3.43
[K].VQTTPSKPGGDR.[FY]	1xTMT6plex [K7]; 1xTMT6plex [N-Term]; 1xPhospho [T4(97.5)]	0.0061155	0.000874552	1	2	3	8	Q62623	Q62623 [67-78]	Q62623 1xPhospho [T70(97.5)]	0	1780.94	Q62623	cell division cycle protein 20 homolog [OS=Rattus norvegicus]	Cdc20	0.469242	0.112285	0.435258	0.513077	0.650528	0.4304	0.0084	0.007	0.706838	0.722344	1	0.4953	0.534218	0.577457	0.0002374	0.001852	2.44
[R].DASLQDWEFGK.[R]	1xTMT6plex [K11]; 1xTMT6plex [N-Term]; 1xPhospho [S3(100)]	0.000628225	7.97536e-05	1	1	1	2	P58871	P58871 [874-884]	P58871 1xPhospho [S876(100)]	0	1833.88	P58871	182 kDa tankyrase-1-binding protein [OS=Mus musculus]	Tnks1bp1	-0.235505	-0.320665	-1.03919	-1.0399	0.634887	0.2882	0.0086	0.0115	0.486362	0.436695	0.370923	1	0.897441	0.718581	1.072e-05	0.000103	3.19
[K].DSFGSGDRK.[R]	1xTMT6plex [K9]; 1xTMT6plex [N-Term]; 1xPhospho [S5(100)]	0.0109205	0.00120429	1	2	1	7	Q7TMB7	Q7TMB7 [681-689]	Q7TMB7 1xPhospho [S685(100)]	1	1506.74	Q7TMB7	Phospholipid phosphatase-related protein type 4 [OS=Rattus norvegicus]	Lppr4; Plppr4	-0.493162	-0.462992	-1.03505	-1.07528	1.09745	0.1359	0.0087	0.0104	0.441751	0.487999	0.346707	0.930826	1	0.72548	0.0004042	0.003453	2.31
[K].AASEELVEK.[S]	1xTMT6plex [K9]; 1xTMT6plex [N-Term]; 1xPhospho [S3(100)]	0.000744329	7.97536e-05	1	1	1	10	Q69ZL1	Q69ZL1 [492-500]	Q69ZL1 1xPhospho [S494(100)]	0	1513.79	Q69ZL1	FYVE, RhoGEF and PH domain-containing protein 6 [OS=Mus musculus]	Fgd6	0.0728427	-0.0230552	-1.02792	-0.902834	0.105906	0.8833	0.0088	0.0184	0.497384	0.490416	0.515813	0.929976	1	0.984146	1.072e-05	0.0001275	3.4
[R].NHPDSELESTANRHSEETEEERSYEGAK.[G]	1xTMT6plex [K28]; 1xTMT6plex [N-Term]; 4xPhospho [S15(99.9); T18(100); S23(100); S/T/Y]	3.12221e-07	7.97536e-05	1	1	2	9	O35314	O35314 [383-410]	O35314 4xPhospho [S397(99.9); T400(100); S405(100); S/T/Y]	2	4009.6	O35314	Secretogranin-1 [OS=Rattus norvegicus]	Chgb	0.623866	-0.831457	-1.02609	-1.18717	1.17587	0.0252	0.0089	0.0073	0.439164	0.411957	0.634824	1	0.83895	0.471457	1.072e-05	8.837e-09	7.51
[K].EAESCDCLQGFQLTHSLGGGTGSGMGTLLISK.[I]	2xCarbamidomethyl [C5; C7]; 1xTMT6plex [K32]; 1xTMT6plex [N-Term]; 1xPhospho [T14(100)]	5.83936e-05	5.91125e-05	3	4	1	1	Q9D6F9; P99024; P68372	Q9D6F9 [123-154]; P99024 [123-154]; P68372 [123-154]	Q9D6F9 1xPhospho [T136(100)]; P99024 1xPhospho [T136(100)]; P68372 1xPhospho [T136(100)]	0	3849.83	Q9D6F9	Tubulin beta-4A chain [OS=Mus musculus]	Tubb4a	0.613035	0.0272441	0.42648	0.397656	1.13727	0.703	0.009	0.0204	0.738602	0.65382	1	0.560666	0.486491	0.495765	5.611e-05	5.407e-05	4.63
[R].STSLVEGR.[S]	1xTMT6plex [N-Term]; 1xPhospho [S3(100)]	0.0101372	0.00114947	1	2	1	2	P22893	P22893 [50-57]	P22893 1xPhospho [S52(100)]	0	1157.58	P22893	mRNA decay activator protein ZFP36 [OS=Mus musculus]	Zfp36	-0.0614576	-0.537321	-1.01775	-1.1472	0.313721	0.0919	0.0091	0.0082	0.451501	0.446737	0.428106	1	0.904533	0.623268	0.0003922	0.003188	1.97
[R].DGLLLDEDEEEEEAAESEEDDNLSSVLHQR.[A]	1xTMT6plex [N-Term]; 2xPhospho [S17(100); S]	0.000967088	0.000160309	1	3	1	1	Q09429	Q09429 [964-993]	Q09429 2xPhospho [S980(100); S]	0	3804.57	Q09429	ATP-binding cassette sub-family C member 8 [OS=Rattus norvegicus]	Abcc8	0.140332	-0.219457	-1.01488	-1.03456	0.0201331	0.4897	0.0094	0.0119	0.476245	0.49487	0.545425	0.975581	1	0.858889	0.0001151	0.0004101	3.21
[K].SGGGGSPETK.[S]	1xTMT6plex [K10]; 1xTMT6plex [N-Term]; 1xPhospho [S6(99.2)]	0.0255784	0.00248745	1	2	2	2	Q9EPI1	Q9EPI1 [106-115]	Q9EPI1 1xPhospho [S111(99.2)]	0	1414.7	Q9EPI1	Xylosyltransferase 1 [OS=Rattus norvegicus]	Xylt1	0.0135034	-0.395214	-1.00165	-1.10666	0.19552	0.1939	0.0095	0.0097	0.464367	0.473259	0.47771	1	0.947601	0.720534	0.0009069	0.01037	3.61
[R].FPLMYEENSRENPFK.[R]	1xTMT6plex [K15]; 1xTMT6plex [N-Term]; 1xPhospho [S9(100)]	5.98771e-07	7.97536e-05	1	2	1	17	P10362	P10362 [168-182]	P10362 1xPhospho [S176(100)]	1	2439.18	P10362	Secretogranin-2 [OS=Rattus norvegicus]	Scg2	0.620788	-0.0440895	-0.998332	-0.810485	1.16431	0.9607	0.0096	0.0276	0.57019	0.474469	0.729598	1	0.947841	0.919313	1.072e-05	1.958e-08	5.47
[K].QEEEEEEEERLSREWEDK.[R]	1xTMT6plex [K18]; 1xTMT6plex [N-Term]; 1xPhospho [S12(100)]	2.52257e-06	7.97536e-05	1	1	1	10	P26339	P26339 [339-356]	P26339 1xPhospho [S350(100)]	2	2917.31	P26339	Chromogranin-A [OS=Mus musculus]	Chga	0.395315	-0.418453	0.418387	0.530567	0.433091	0.1719	0.0097	0.0063	0.833151	0.760323	1	0.576776	0.56892	0.425681	1.072e-05	1.14e-07	5.31
[K].YCRPESQEHPEADPGSAAPYLK.[T]	1xCarbamidomethyl [C2]; 1xTMT6plex [K22]; 1xTMT6plex [N-Term]; 1xPhospho [Y20(100)]	2.1951e-05	7.97536e-05	1	3	1	2	P42227	P42227 [686-707]	P42227 1xPhospho [Y705(100)]	0	3040.43	P42227	Signal transducer and activator of transcription 3 [OS=Mus musculus]	Stat3	0.0874609	0.0109156	-0.993989	-1.07305	0.0847057	0.7563	0.0098	0.0105	0.448484	0.498303	0.529446	0.943555	0.992462	1	1.072e-05	1.62e-06	4.18
[R].SVSVATGLNMMK.[K]	2xOxidation [M10; M11]; 1xTMT6plex [K12]; 1xTMT6plex [N-Term]; 1xPhospho [S3(100)]	0.00677458	0.000930136	1	3	2	5	Q3KR97	Q3KR97 [330-341]	Q3KR97 1xPhospho [S332(100)]	0	1807.91	Q3KR97	Brain-specific angiogenesis inhibitor 1-associated protein 2-like protein 1 [OS=Rattus norvegicus]	Baiap2l1	-0.0860753	-0.0267627	-0.992848	-0.707948	0.35389	0.8973	0.0099	0.0432	0.514985	0.502485	0.473382	0.841217	1	0.98162	0.0002594	0.002075	2.8
[R].KFSPQK.[E]	2xTMT6plex [K1; K6]; 1xTMT6plex [N-Term]; 1xPhospho [S3(100)]	0.0636061	0.00471789	1	1	1	7	Q9QXK2	Q9QXK2 [156-161]	Q9QXK2 1xPhospho [S158(100)]	1	1501.87	Q9QXK2	E3 ubiquitin-protein ligase RAD18 [OS=Mus musculus]	Rad18	0.086638	-0.011799	0.416425	0.594592	0.0856568	0.8411	0.01	0.0035	0.974927	0.941715	1	0.645628	0.705607	0.69986	0.001675	0.01829	2.22
[K].KVPEQPPVLPQLDSQHL.[-]	1xTMT6plex [K1]; 1xTMT6plex [N-Term]; 1xPhospho [S14(100)]	2.20753e-07	7.97536e-05	1	1	1	8	Q63083	Q63083 [443-459]	Q63083 1xPhospho [S456(100)]	1	2463.34	Q63083	Nucleobindin-1 [OS=Rattus norvegicus]	Nucb1	0.198969	-0.132945	-0.977931	-0.963723	0.0538918	0.7285	0.0105	0.0149	0.495552	0.507707	0.582786	0.966493	1	0.911968	1.072e-05	5.785e-09	5.36
[R].SRSSPTSDK.[K]	1xTMT6plex [K9]; 1xTMT6plex [N-Term]; 2xPhospho [S3(100); S4(98.7)]	0.0765271	0.00565613	1	4	1	1	Q9QXN0-1	Q9QXN0-1 [1238-1246]	Q9QXN0-1 2xPhospho [S1240(100); S1241(98.7)]	1	1582.73	Q9QXN0-1	protein Shroom3 [OS=Mus musculus]	Shroom3	0.0677827	0.29463	-0.978594	-0.872282	0.113848	0.1026	0.0105	0.0213	0.429228	0.413734	0.433637	0.785725	0.815282	1	0.001916	0.0217	2.19
[K].KSPLIESTANMENNQPQK.[TA]	1xOxidation [M11]; 2xTMT6plex [K1; K18]; 1xTMT6plex [N-Term]; 1xPhospho [S2(100)]	2.09665e-07	7.97536e-05	1	5	1	42	Q10728-1	Q10728-1 [298-315]	Q10728-1 1xPhospho [S299(100)]	1	2812.45	Q10728-1	Protein phosphatase 1 regulatory subunit 12A [OS=Rattus norvegicus]	Ppp1r12a	-0.00024026	-0.152189	-0.956872	-0.957173	0.217527	0.672	0.0108	0.0152	0.515065	0.509428	0.509343	1	0.988849	0.889849	1.072e-05	5.415e-09	6.77
[K].VGESFEETLEETVVSTK.[K]	1xTMT6plex [K17]; 1xTMT6plex [N-Term]; 1xPhospho [S4(100)]	0.00150217	0.000170064	1	1	1	4	P23565	P23565 [471-487]	P23565 1xPhospho [S474(100)]	0	2422.2	P23565	alpha-internexin [OS=Rattus norvegicus]	Ina	0.0152301	-0.247734	0.399048	0.505561	0.19233	0.4231	0.0114	0.0074	1	0.92497	0.934786	0.704386	0.701459	0.590782	0.0001248	0.0005738	3.37
[R].LHIPPALTENDRDSQSPLK.[N]	1xTMT6plex [K19]; 1xTMT6plex [N-Term]; 1xPhospho [S16(99.1)]	0.0007678	7.97536e-05	1	1	2	7	Q9Z1A9	Q9Z1A9 [922-940]	Q9Z1A9 1xPhospho [S937(99.1)]	1	2669.41	Q9Z1A9	TBC1 domain family member 8 [OS=Mus musculus]	Tbc1d8	0.0199991	0.502113	0.398525	0.478702	0.184024	0.016	0.0116	0.0099	1	0.880772	0.893066	0.717623	0.668183	0.946339	1.072e-05	0.0001331	3.22
[R].SQSSTPK.[V]	1xTMT6plex [K7]; 1xTMT6plex [N-Term]; 1xPhospho [T5(100)]	0.126424	0.00925296	1	3	1	1	P98195-1	P98195-1 [525-531]	P98195-1 1xPhospho [T529(100)]	0	1272.66	P98195-1	Probable phospholipid-transporting ATPase IIB [OS=Mus musculus]	Atp9b	0.196052	-0.0351352	0.398329	0.521034	0.0504148	0.9286	0.0119	0.0065	0.949162	0.872936	1	0.661445	0.662329	0.646393	0.002853	0.03506	1.34
[K].KGPSTPYTK.[S]	2xTMT6plex [K1; K9]; 1xTMT6plex [N-Term]; 1xPhospho [T5(100)]	0.00657801	0.000930136	1	2	1	1	Q6PDG5-1	Q6PDG5-1 [318-326]	Q6PDG5-1 1xPhospho [T322(100)]	1	1745.98	Q6PDG5-1	SWI/SNF complex subunit SMARCC2 [OS=Mus musculus]	Smarcc2	0.869571	0.125631	0.395662	0.382519	1.80688	0.3943	0.0124	0.0241	0.489022	0.54731	1	0.375127	0.416032	0.453885	0.0002594	0.002014	2.52
[K].DYDTLSK.[Y]	1xTMT6plex [K7]; 1xTMT6plex [N-Term]; 1xPhospho [T4(100)]	0.0168145	0.00145239	1	3	2	8	Q3KR97	Q3KR97 [273-279]	Q3KR97 1xPhospho [T276(100)]	0	1379.69	Q3KR97	Brain-specific angiogenesis inhibitor 1-associated protein 2-like protein 1 [OS=Rattus norvegicus]	Baiap2l1	0.257585	-0.0919653	-0.938354	-0.866246	0.141282	0.868	0.0125	0.0215	0.548572	0.447212	0.534631	1	0.85701	0.804084	0.0005456	0.005317	2.42
[K].SFDQLTPEESK.[E]	1xTMT6plex [K11]; 1xTMT6plex [N-Term]; 1xPhospho [S10(100)]	2.64694e-05	7.97536e-05	1	1	1	13	O35887	O35887 [60-70]	O35887 1xPhospho [S69(100)]	0	1818.89	O35887	Calumenin [OS=Mus musculus]	Calu	0.124334	-0.134909	-0.93623	-1.10981	0.0398147	0.723	0.0126	0.0095	0.463355	0.462918	0.504582	1	0.885803	0.806725	1.072e-05	2.042e-06	3.9
[K].QSSTESITEEFYK.[Y]	1xTMT6plex [K13]; 1xTMT6plex [N-Term]; 1xPhospho [S3(99.4)]	1.82031e-05	7.97536e-05	1	1	2	17	P0C6C0	P0C6C0 [1165-1177]	P0C6C0 1xPhospho [S1167(99.4)]	0	2087	P0C6C0	A-kinase anchor protein SPHKAP [OS=Rattus norvegicus]	Sphkap	0.0465639	-0.138882	0.394447	0.363715	0.143271	0.7126	0.0127	0.0295	0.998066	0.96824	1	0.775658	0.736618	0.669013	1.072e-05	1.292e-06	4.43
[R].GSPGLSK.[N]	1xTMT6plex [K7]; 1xTMT6plex [N-Term]; 1xPhospho [S2(100)]	0.0653043	0.00475763	1	2	1	2	O35601	O35601 [266-272]	O35601 1xPhospho [S267(100)]	0	1183.65	O35601	FYN-binding protein 1 [OS=Mus musculus]	Fyb	-0.360136	-0.322972	0.393452	0.402021	0.869666	0.2843	0.0129	0.0194	0.933933	1	0.779091	0.706798	0.761306	0.608604	0.001683	0.01875	1.95
[R].RGWRPSSREDSVEAR.[GS]	1xTMT6plex [N-Term]; 1xPhospho [S]	0.000737748	7.97536e-05	2	2	4	22	P10354; P26339	P10354 [407-421]; P26339 [404-418]		2	2097.02	P10354	Chromogranin-A [OS=Rattus norvegicus]	Chga	0.0849413	0.137043	0.39189	0.395295	0.0880438	0.3629	0.0131	0.0211	0.873837	0.942823	1	0.664408	0.718554	0.790157	1.072e-05	0.0001261	3.39
[K].GHEYTNIK.[Y]	1xTMT6plex [K8]; 1xTMT6plex [N-Term]; 1xPhospho [Y4(99.4)]	0.000371209	7.97536e-05	1	4	2	4	P35235	P35235 [543-550]	P35235 1xPhospho [Y546(99.4)]	0	1499.77	P35235	tyrosine-protein phosphatase non-receptor type 11 [OS=Mus musculus]	Ptpn11	-0.247614	-0.0442727	-0.928251	-0.69	0.659953	0.9613	0.0132	0.0474	0.52718	0.525495	0.442618	0.850491	1	0.969779	1.072e-05	5.299e-05	2.55
[R].DSDTDVEEGSSGGKR.[E]	1xTMT6plex [K14]; 1xTMT6plex [N-Term]; 1xPhospho [T4(100)]	0.000320576	7.97536e-05	1	1	1	2	Q5U2M8	Q5U2M8 [437-451]	Q5U2M8 1xPhospho [T440(100)]	1	2076.95	Q5U2M8	Mediator of DNA damage checkpoint protein 1 [OS=Rattus norvegicus]	Mdc1	0.665945	0.210256	0.391013	0.603918	1.2993	0.2099	0.0133	0.0033	0.66296	0.630276	1	0.436205	0.480645	0.556055	1.072e-05	4.414e-05	2.63
[K].QPLLLSEDEEDTKR.[V]	1xTMT6plex [K13]; 1xTMT6plex [N-Term]; 1xPhospho [S6(100)]	0.000603347	7.97536e-05	1	2	1	1	B5DFC8	B5DFC8 [34-47]	B5DFC8 1xPhospho [S39(100)]	1	2211.13	B5DFC8	Eukaryotic translation initiation factor 3 subunit C [OS=Rattus norvegicus]	Eif3c	0.650521	0.0684809	0.390929	0.403657	1.25727	0.5624	0.0134	0.0193	0.597912	0.63705	1	0.451985	0.485839	0.509456	1.072e-05	9.77e-05	2.95
[R].KRSPTENVNTPVGK.[D]	2xTMT6plex [K1; K14]; 1xTMT6plex [N-Term]; 1xPhospho [S3(100)]	4.12792e-05	7.97536e-05	2	16	2	12	O08873; Q80U28-14	O08873 [1036-1049]; Q80U28-14 [1036-1049]	O08873 1xPhospho [S1038(100)]; Q80U28-14 1xPhospho [S1038(100)]	2	2294.28	O08873	MAP kinase-activating death domain protein [OS=Rattus norvegicus]	Madd	0.291935	-0.156956	-0.912788	-0.894494	0.204676	0.6576	0.0139	0.0191	0.528999	0.531158	0.650286	0.983388	1	0.896916	1.072e-05	3.513e-06	3.44
[R].SNTPESIAETPPAR.[D]	1xTMT6plex [N-Term]; 1xPhospho [T3(100)]	6.34728e-06	7.97536e-05	1	1	3	24	P81122	P81122 [515-528]	P81122 1xPhospho [T517(100)]	0	1778.85	P81122	Insulin receptor substrate 2 [OS=Mus musculus]	Irs2	0.0301709	-0.238988	0.385091	0.426332	0.166598	0.4437	0.014	0.0156	0.915474	0.979304	1	0.681251	0.749883	0.635406	1.072e-05	3.547e-07	4.08
[K].LTNSQTSLCEILQEK.[G]	1xCarbamidomethyl [C9]; 1xTMT6plex [K15]; 1xTMT6plex [N-Term]; 2xPhospho [S4(100); T6(99)]	0.00149263	0.000322997	1	1	1	2	P51830	P51830 [685-699]	P51830 2xPhospho [S688(100); T690(99)]	0	2382.14	P51830	Adenylate cyclase type 9 [OS=Mus musculus]	Adcy9	0.603096	0.406391	-0.909959	-1.05296	1.10018	0.0367	0.0141	0.0109	0.344129	0.40155	0.609943	0.713992	0.754508	1	5.222e-05	0.0003175	2.71
[R].VASPVNK.[S]	1xTMT6plex [K7]; 1xTMT6plex [N-Term]; 1xPhospho [S3(100)]	0.0266421	0.00232722	1	4	1	3	Q8BYJ6	Q8BYJ6 [787-793]	Q8BYJ6 1xPhospho [S789(100)]	0	1252.71	Q8BYJ6	TBC1 domain family member 4 [OS=Mus musculus]	Tbc1d4	0.137545	0.465043	0.383132	0.42337	0.0236042	0.0217	0.0144	0.0159	1	0.887246	0.975998	0.745681	0.680314	0.939078	0.0009067	0.008231	2.04
[R].DASSLTNLK.[R]	1xTMT6plex [K9]; 1xTMT6plex [N-Term]; 1xPhospho [S4(100)]	0.00489615	0.000816232	1	2	3	9	Q7TMB7	Q7TMB7 [383-391]	Q7TMB7 1xPhospho [S386(100)]	0	1486.79	Q7TMB7	Phospholipid phosphatase-related protein type 4 [OS=Rattus norvegicus]	Lppr4; Plppr4	0.0310733	0.0514269	-0.906264	-0.711051	0.16469	0.6209	0.0145	0.042	0.564862	0.51488	0.52609	0.924677	0.964981	1	0.0001745	0.001436	3.42
[K].GSPGGDLGAK.[K]	1xTMT6plex [K10]; 1xTMT6plex [N-Term]; 1xPhospho [S2(100)]	0.0806	0.00611168	1	1	1	1	O70311	O70311 [37-46]	O70311 1xPhospho [S38(100)]	0	1396.72	O70311	Glycylpeptide N-tetradecanoyltransferase 2 [OS=Mus musculus]	Nmt2	-0.127648	0.576045	0.373821	0.318185	0.428291	0.0084	0.0154	0.0444	0.931987	0.86921	0.795607	0.747526	0.6708	1	0.002552	0.03739	3.46
[R].RVQRPEDASGGSSPSGTSK.[S]	1xTMT6plex [K19]; 1xTMT6plex [N-Term]; 1xPhospho [S9(97.8)]	0.00415203	0.000769263	1	3	1	1	O08719	O08719 [232-250]	O08719 1xPhospho [S240(97.8)]	1	2441.22	O08719	Ena/VASP-like protein [OS=Rattus norvegicus]	Evl	0.745472	0.211698	0.372705	0.424914	1.48413	0.2081	0.0155	0.0158	0.64696	0.596473	1	0.481909	0.460676	0.533486	0.000151	0.001178	2.25
[K].GQEEQSPGLEDK.[D]	1xTMT6plex [K12]; 1xTMT6plex [N-Term]; 1xPhospho [S6(100)]	0.000100221	7.97536e-05	1	1	1	11	Q64548-1	Q64548-1 [205-216]	Q64548-1 1xPhospho [S210(100)]	0	1854.89	Q64548-1	Reticulon-1 [OS=Rattus norvegicus]	Rtn1	0.0634713	0.304213	-0.879957	-1.03134	0.119644	0.0932	0.0156	0.012	0.422701	0.440078	0.459871	0.863968	0.809884	1	1.072e-05	1.045e-05	3.52
[K].EDNSEGEEILEEVGGDPEEEDDHHMEFCR.[V]	1xCarbamidomethyl [C28]; 1xOxidation [M25]; 1xTMT6plex [N-Term]; 1xPhospho [S4(100)]	2.18694e-07	7.97536e-05	1	1	1	6	Q6PDQ2	Q6PDQ2 [418-446]	Q6PDQ2 1xPhospho [S421(100)]	0	3757.46	Q6PDQ2	Chromodomain-helicase-DNA-binding protein 4 [OS=Mus musculus]	Chd4	1.31155	0.441396	-0.879712	-0.789114	2.55284	0.0273	0.0157	0.0307	0.465407	0.400227	0.993396	0.804229	0.736422	1	1.072e-05	5.72e-09	5.95
[K].RKASGSENEGDYNPGR.[K]	1xTMT6plex [K2]; 1xTMT6plex [N-Term]; 2xPhospho [S4(100); S6(100)]	2.34373e-05	7.97536e-05	1	1	1	4	Q64511	Q64511 [1534-1549]	Q64511 2xPhospho [S1537(100); S1539(100)]	2	2355.05	Q64511	DNA topoisomerase 2-beta [OS=Mus musculus]	Top2b	0.082273	-0.341204	-0.877752	-0.728542	0.0914078	0.2572	0.0158	0.0397	0.56574	0.544215	0.576152	0.937412	1	0.789382	1.072e-05	1.755e-06	5.07
[K].DSEVSTKPEGVHAPNQPSPVEGK.[L]	2xTMT6plex [K7; K23]; 1xTMT6plex [N-Term]; 1xPhospho [S18(100)]	3.41348e-11	7.97536e-05	1	1	1	12	Q64548-1	Q64548-1 [224-246]	Q64548-1 1xPhospho [S241(100)]	0	3156.62	Q64548-1	Reticulon-1 [OS=Rattus norvegicus]	Rtn1	0.23457	0.212496	-0.876855	-0.919549	0.103915	0.2069	0.0159	0.0176	0.475303	0.469973	0.552949	0.899047	0.863043	1	1.072e-05	1.237e-13	6.1
[K].LFVIRGSPQQIDHAK.[Q]	1xTMT6plex [K15]; 1xTMT6plex [N-Term]; 1xPhospho [S7(100)]	3.57654e-07	7.97536e-05	1	2	1	28	Q3U0V1	Q3U0V1 [475-489]	Q3U0V1 1xPhospho [S481(100)]	1	2247.24	Q3U0V1	Far upstream element-binding protein 2 [OS=Mus musculus]	Khsrp	0.482388	-0.195185	0.369901	0.432082	0.694649	0.5483	0.016	0.0146	0.878602	0.715792	1	0.651212	0.553905	0.483814	1.072e-05	1.042e-08	4.83
[K].VAWIPDVESR.[Q]	1xTMT6plex [N-Term]; 1xPhospho [S9(100)]	0.00450633	0.000769263	1	2	1	15	P10362	P10362 [483-492]	P10362 1xPhospho [S491(100)]	0	1480.74	P10362	Secretogranin-2 [OS=Rattus norvegicus]	Scg2	-0.021653	0.149513	-0.874731	-1.09151	0.249569	0.3335	0.0162	0.01	0.465044	0.491668	0.484344	0.990992	0.901555	1	0.000159	0.001302	3.15
[K].NVFTSAEELER.[A]	1xTMT6plex [N-Term]; 1xPhospho [S5(99)]	0.000421851	7.97536e-05	1	1	2	3	Q91WM6	Q91WM6 [114-124]	Q91WM6 1xPhospho [S118(99)]	0	1603.76	Q91WM6	protein eva-1 homolog A [OS=Mus musculus]	Eva1a; Fam176a	0.0760801	-0.0607351	0.367822	0.462282	0.100398	0.9795	0.0163	0.0112	0.988241	0.948632	1	0.717302	0.735143	0.704838	1.072e-05	6.229e-05	3.16
[K].EIPSPEMETPAQK.[T]	1xOxidation [M7]; 1xTMT6plex [K13]; 1xTMT6plex [N-Term]; 1xPhospho [S4(100)]	0.00396911	0.000710363	1	1	1	1	Q63358	Q63358 [1112-1124]	Q63358 1xPhospho [S1115(100)]	0	2010.99	Q63358	Unconventional myosin-IXb [OS=Rattus norvegicus]	Myo9b	0.114231	-0.236146	-0.869104	-0.842924	0.0523213	0.4506	0.0165	0.0243	0.473425	0.547487	0.592598	0.849173	1	0.849011	0.000135	0.001117	3
[K].EFPEDVEKESEENETDKSEFDEGSER.[V]	2xTMT6plex [K8; K17]; 1xTMT6plex [N-Term]; 3xPhospho [S10(100); T15(100); S18(97.6)]	0.00323753	0.000655236	1	1	1	2	Q8BGC0-1	Q8BGC0-1 [581-606]	Q8BGC0-1 3xPhospho [S590(100); T595(100); S598(97.6)]	2	4017.67	Q8BGC0-1	HIV Tat-specific factor 1 homolog [OS=Mus musculus]	Htatsf1	-0.207715	-0.127949	-0.864089	-0.767726	0.577246	0.7434	0.0168	0.0335	0.507132	0.549393	0.475724	0.863435	1	0.915131	0.0001204	0.0008657	3.62
[K].SGTLKSPPK.[G]	2xTMT6plex [K5; K9]; 1xTMT6plex [N-Term]; 1xPhospho [T/S]	0.0909121	0.00647099	2	9	2	2	Q9ES28-1; O55043	Q9ES28-1 [231-239]; O55043 [74-82]		1	1681.99	Q9ES28-1	Rho guanine nucleotide exchange factor 7 [OS=Mus musculus]	Arhgef7	0.916398	0.0675308	0.363873	0.844079	1.89963	0.5661	0.0169	0.0003	0.659058	0.52983	1	0.367139	0.411718	0.431448	0.002137	0.02556	1.5
[K].GNEEDTGLNPGRDSATNQIR.[K]	1xTMT6plex [N-Term]; 1xPhospho [S14(100)]	0.0161565	0.00140197	1	3	1	1	Q62656	Q62656 [436-455]	Q62656 1xPhospho [S449(100)]	1	2453.13	Q62656	Receptor-type tyrosine-protein phosphatase zeta [OS=Rattus norvegicus]	Ptprz1	-0.0720469	0.213647	-0.85978	-0.774594	0.330497	0.2049	0.017	0.0327	0.489777	0.475189	0.452041	0.837866	0.862355	1	0.0005393	0.005105	2.7
[R].YQDEEVLPSERISPQVPNEVLGPELVHVSEK.[S]	1xTMT6plex [K31]; 1xTMT6plex [N-Term]; 1xPhospho [S13(100)]	2.23917e-11	7.97536e-05	1	1	1	3	Q62696	Q62696 [110-140]	Q62696 1xPhospho [S122(100)]	1	4055.08	Q62696	Disks large homolog 1 [OS=Rattus norvegicus]	Dlg1	0.283858	-0.606339	-0.859305	-0.886836	0.189499	0.0634	0.0171	0.0198	0.487664	0.551218	0.671078	0.901747	1	0.656861	1.072e-05	7.372e-14	6.82
[R].SIGSDSQGR.[A]	1xTMT6plex [N-Term]; 1xPhospho [S4(99.1)]	0.00250977	0.000525785	1	2	3	4	Q9R0L6-1	Q9R0L6-1 [116-124]	Q9R0L6-1 1xPhospho [S119(99.1)]	0	1215.56	Q9R0L6-1	Pericentriolar material 1 protein [OS=Mus musculus]	Pcm1	0.00645465	0.0296934	0.362043	0.559762	0.205442	0.6926	0.0174	0.0046	0.96526	0.995536	1	0.654846	0.774589	0.790696	8.648e-05	0.0006263	2.71
[R].TVSLGAGAKDELHIVEAEAMNYEGSPIK.[V]	2xTMT6plex [K9; K28]; 1xTMT6plex [N-Term]; 1xPhospho [S25(100)]	7.94336e-05	5.91125e-05	1	3	1	1	P13084	P13084 [46-73]	P13084 1xPhospho [S70(100)]	1	3696.92	P13084	Nucleophosmin [OS=Rattus norvegicus]	Npm1	0.970979	0.21328	0.361077	0.581789	2.03621	0.2056	0.0176	0.0039	0.527592	0.51016	1	0.352503	0.397202	0.460484	5.611e-05	6.871e-05	6.85
[K].QLTQDMSTQRAVQTEK.[E]	1xOxidation [M6]; 1xTMT6plex [K16]; 1xTMT6plex [N-Term]; 1xPhospho [S/T]	0.0391953	0.0034251	1	1	1	2	Q8BKX6	Q8BKX6 [3375-3390]		1	2418.21	Q8BKX6	Serine/threonine-protein kinase SMG1 [OS=Mus musculus]	Smg1	-0.824618	-0.512472	0.360732	0.373049	1.45842	0.1063	0.0176	0.0265	1	0.887133	0.500903	0.772149	0.690872	0.484315	0.001373	0.01695	1.61
[K].QYAENYTRPSSR.[N]	1xTMT6plex [N-Term]; 1xPhospho [S11(99.2)]	0.00108927	7.97536e-05	1	3	3	10	Q4V7E8	Q4V7E8 [104-115]	Q4V7E8 1xPhospho [S114(99.2)]	0	1780.82	Q4V7E8	Leucine-rich repeat flightless-interacting protein 2 [OS=Rattus norvegicus]	Lrrfip2	-0.297184	-0.192884	0.360254	0.384147	0.752272	0.5552	0.0178	0.0236	0.904063	1	0.813839	0.692722	0.779027	0.681536	1.072e-05	0.0002088	2.4
[K].LPSISDLDSIFGPVLSPK.[S]	1xTMT6plex [K18]; 1xTMT6plex [N-Term]; 2xPhospho [S3(100); S16(100)]	0.0135769	0.00128835	1	4	1	1	P0DJJ3	P0DJJ3 [285-302]	P0DJJ3 2xPhospho [S287(100); S300(100)]	0	2503.29	P0DJJ3	SH3-containing GRB2-like protein 3-interacting protein 1 [OS=Rattus norvegicus]	Sgip1	-0.330431	-0.684951	-0.852593	-0.756759	0.819874	0.0444	0.018	0.0349	0.510119	0.553788	0.440427	0.861944	1	0.622027	0.0004638	0.004301	3.04
[K].GSESPEMGPEVSPAPR.[D]	1xOxidation [M7]; 1xTMT6plex [N-Term]; 1xPhospho [S4(100)]	0.00138326	0.000161714	1	1	1	3	Q9JL61	Q9JL61 [181-196]	Q9JL61 1xPhospho [S184(100)]	0	1951.87	Q9JL61	DNA-binding protein RFX5 [OS=Mus musculus]	Rfx5	0.0453262	-0.12504	-0.852593	-0.854056	0.145633	0.7543	0.0181	0.023	0.510119	0.553788	0.571463	0.922079	1	0.916979	2.12e-05	0.0002868	2.2
[R].LLSFRSMEETRPVPTVK.[E]	1xTMT6plex [K17]; 1xTMT6plex [N-Term]; 2xPhospho [S3(100); S6(100)]	0.00177412	0.00046153	1	2	1	4	Q5SSH7-1	Q5SSH7-1 [1533-1549]	Q5SSH7-1 2xPhospho [S1535(100); S1538(100)]	1	2608.34	Q5SSH7-1	Zinc finger ZZ-type and EF-hand domain-containing protein 1 [OS=Mus musculus]	Zzef1	0.141389	-0.863692	-0.852119	-1.13153	0.0187252	0.0224	0.0183	0.0087	0.45643	0.465019	0.512901	1	0.83943	0.461304	6.971e-05	0.0003989	2.94
[R].TASGSSVTSLEGTRSR.[S]	1xTMT6plex [N-Term]; 4xPhospho [S5(98); S6(100); T8(98); S15(100)]	0.000611534	7.97536e-05	1	2	2	2	Q6JE36	Q6JE36 [328-343]	Q6JE36 4xPhospho [S332(98); S333(100); T335(98); S342(100)]	1	2144.83	Q6JE36	Protein NDRG1 [OS=Rattus norvegicus]	Ndrg1	0.0030575	-0.399443	-0.848355	-0.755492	0.211619	0.1891	0.0185	0.0352	0.528916	0.555417	0.556596	0.89292	1	0.758151	1.072e-05	9.938e-05	4.25
[K].KDDQSPLDIK.[V]	2xTMT6plex [K1; K10]; 1xTMT6plex [N-Term]; 1xPhospho [S5(100)]	2.33279e-05	7.97536e-05	1	2	1	10	P15146	P15146 [1047-1056]	P15146 1xPhospho [S1051(100)]	1	1926.06	P15146	microtubule-associated protein 2 [OS=Rattus norvegicus]	Map2	0.481829	-0.194388	-0.845749	-0.701449	0.692932	0.5506	0.0189	0.0451	0.614954	0.537393	0.750476	1	0.965801	0.844056	1.072e-05	1.744e-06	3.26
[K].GPLEAPQDGEAEEGTTSDGEKK.[R]	2xTMT6plex [K21; K22]; 1xTMT6plex [N-Term]; 1xPhospho [S17(97.5)]	0.000376338	7.97536e-05	1	3	1	1	Q5QD51-1	Q5QD51-1 [569-590]	Q5QD51-1 1xPhospho [S585(97.5)]	1	3012.47	Q5QD51-1	A-kinase anchor protein 12 [OS=Rattus norvegicus]	Akap12	0.694592	0.0065247	-0.840155	-0.720296	1.36452	0.7737	0.0196	0.0408	0.606973	0.500486	0.809999	1	0.895991	0.900052	1.072e-05	5.39e-05	3.97
[R].SHPSGGSTK.[K]	1xTMT6plex [K9]; 1xTMT6plex [N-Term]; 1xPhospho [S4(100)]	0.0141152	0.00128835	1	2	1	5	A0MZ67	A0MZ67 [381-389]	A0MZ67 1xPhospho [S384(100)]	0	1395.7	A0MZ67	Shootin-1 [OS=Rattus norvegicus]	RGD1311558; Shtn1	0.220449	0.415985	-0.838885	-1.06203	0.082232	0.034	0.0199	0.0107	0.369492	0.419031	0.488212	0.771448	0.749507	1	0.000471	0.00448	2.83
[K].RGGGGDEEPGEYQHIHTESPESADEQK.[G]	1xTMT6plex [K27]; 1xTMT6plex [N-Term]; 2xPhospho [S19(100); S22(100)]	2.81671e-09	7.97536e-05	1	3	1	2	Q5QD51-1	Q5QD51-1 [523-549]	Q5QD51-1 2xPhospho [S541(100); S544(100)]	1	3557.53	Q5QD51-1	A-kinase anchor protein 12 [OS=Rattus norvegicus]	Akap12	0.167338	-0.21465	-0.83559	-0.854376	0.0135866	0.5	0.02	0.0229	0.553105	0.505427	0.567587	1	0.901979	0.777285	1.072e-05	2.766e-11	6.47
[K].QEATPRSPCSLK.[E]	1xCarbamidomethyl [C9]; 1xTMT6plex [K12]; 1xTMT6plex [N-Term]; 1xPhospho [S7(100)]	0.00170097	0.00046153	1	1	2	7	P34926	P34926 [1154-1165]	P34926 1xPhospho [S1160(100)]	1	1911.98	P34926	Microtubule-associated protein 1A [OS=Rattus norvegicus]	Map1a	0.397767	0.034045	-0.830582	-0.742332	0.438541	0.6786	0.0203	0.0373	0.557982	0.549188	0.723537	0.933436	0.976678	1	6.971e-05	0.0003777	2.66
[R].VEAHPENNRPIIQIPSSTEGEGSGSWK.[W]	1xTMT6plex [K27]; 1xTMT6plex [N-Term]; 1xPhospho [S25(100)]	1.5355e-08	7.97536e-05	1	2	3	18	Q7TMB7	Q7TMB7 [625-651]	Q7TMB7 1xPhospho [S649(100)]	0	3457.72	Q7TMB7	Phospholipid phosphatase-related protein type 4 [OS=Rattus norvegicus]	Lppr4; Plppr4	-0.205691	-0.36466	-0.828398	-0.863286	0.573489	0.2278	0.0209	0.0223	0.504122	0.563154	0.488324	0.917087	1	0.776652	1.072e-05	2.21e-10	6.44
[K].LFSPVISR.[N]	1xTMT6plex [N-Term]; 1xPhospho [S3(100)]	0.0127782	0.00125084	1	2	1	8	A6H8H2-2	A6H8H2-2 [1268-1275]	A6H8H2-2 1xPhospho [S1270(100)]	0	1227.67	A6H8H2-2	Isoform 2 of DENN domain-containing protein 4C [OS=Mus musculus]	Dennd4c	-0.181231	-0.0298285	-0.826981	-0.943298	0.525929	0.9075	0.021	0.016	0.520043	0.53787	0.474374	1	0.954164	0.934639	0.0004524	0.004038	2.52
[R].LEGEDDPDRSMK.[L]	1xOxidation [M11]; 1xTMT6plex [K12]; 1xTMT6plex [N-Term]; 1xPhospho [S10(100)]	0.00285446	0.000587017	2	2	1	11	P10354; P26339	P10354 [377-388]; P26339 [374-385]	P10354 1xPhospho [S386(100)]; P26339 1xPhospho [S383(100)]	1	1945.9	P10354	Chromogranin-A [OS=Rattus norvegicus]	Chga	0.0573884	-0.529487	-0.825785	-0.929659	0.126389	0.0965	0.0213	0.0166	0.524982	0.456979	0.475523	1	0.809994	0.561165	0.0001035	0.0007393	2.83
[K].QADVPAAVTDAAATTPAAEDAAK.[A]	1xTMT6plex [K23]; 1xTMT6plex [N-Term]; 1xPhospho [T15(100)]	1.09607e-12	7.97536e-05	1	1	3	10	P07936	P07936 [158-180]	P07936 1xPhospho [T172(100)]	0	2693.34	P07936	Neuromodulin [OS=Rattus norvegicus]	Gap43	0.293728	-0.647687	-0.821927	-0.880764	0.20866	0.0537	0.0216	0.0199	0.54308	0.488357	0.59863	1	0.8633	0.551047	1.072e-05	1.829e-15	6.79
[K].LHSDSGISVDSQSLHDQQTHTQTASGQALK.[G]	1xTMT6plex [K30]; 1xTMT6plex [N-Term]; 1xPhospho [S/T]	1.48983e-05	3.88506e-05	1	1	2	2	P07174	P07174 [302-331]		0	3714.81	P07174	Tumor necrosis factor receptor superfamily member 16 [OS=Rattus norvegicus]	Ngfr	-0.0132666	-0.182306	-0.82166	-1.02087	0.236422	0.5863	0.0217	0.0123	0.492819	0.536376	0.531466	1	0.948011	0.835476	1.413e-05	1.529e-05	5.03
[R].MDTGPQSLSGKSTPSSGDVQVTEDAVR.[R]	1xTMT6plex [K11]; 1xTMT6plex [N-Term]; 2xPhospho [S9(98.7); S/T]	5.0706e-08	7.97536e-05	1	2	3	4	Q3THK3	Q3THK3 [425-451]	Q3THK3 2xPhospho [S433(98.7); S/T]	1	3367.55	Q3THK3	General transcription factor iif subunit 1 [OS=Mus musculus]	Gtf2f1	-0.120217	0.0317885	0.344748	0.335069	0.41375	0.687	0.0219	0.0381	1	0.944246	0.868752	0.792746	0.743542	0.760107	1.072e-05	9.536e-10	5.27
[K].SLEAASEK.[Y]	1xTMT6plex [K8]; 1xTMT6plex [N-Term]; 1xPhospho [S1(100)]	0.0060568	0.000874552	1	2	1	1	P09495	P09495 [170-177]	P09495 1xPhospho [S170(100)]	0	1372.71	P09495	Tropomyosin alpha-4 chain [OS=Rattus norvegicus]	Tpm4	0.749376	0.0932284	-0.816613	-0.84062	1.49621	0.4866	0.0221	0.0245	0.558404	0.486168	0.817281	1	0.856272	0.913432	0.0002305	0.001832	2.82
[R].AFSFSK.[T]	1xTMT6plex [K6]; 1xTMT6plex [N-Term]; 1xPhospho [S3(100)]	0.0702214	0.00509165	1	2	1	5	Q07139	Q07139 [840-845]	Q07139 1xPhospho [S842(100)]	0	1224.64	Q07139	Protein ECT2 [OS=Mus musculus]	Ect2	0.48269	0.108933	0.342528	0.520859	0.696588	0.4398	0.0222	0.0066	0.782879	0.715642	1	0.545633	0.564397	0.608663	0.001776	0.01997	2.12
[K].DTDSTGSPDRDGMQPSPHEPPYHSK.[A]	1xOxidation [M13]; 1xTMT6plex [K25]; 1xTMT6plex [N-Term]; 2xPhospho [S4(98.8); S7(98.8)]	8.93445e-06	7.97536e-05	1	4	1	2	P0DJJ3	P0DJJ3 [21-45]	P0DJJ3 2xPhospho [S24(98.8); S27(98.8)]	1	3372.43	P0DJJ3	SH3-containing GRB2-like protein 3-interacting protein 1 [OS=Rattus norvegicus]	Sgip1	-0.0507282	-0.389859	-0.816038	-0.715432	0.295592	0.1992	0.0222	0.0417	0.559115	0.568	0.548375	0.918053	1	0.763204	1.072e-05	5.395e-07	5.64
[K].HTSPHAK.[E]	1xTMT6plex [K7]; 1xTMT6plex [N-Term]; 1xPhospho [T2(99.5)]	0.0529478	0.00406892	1	1	3	5	Q66HF9	Q66HF9 [538-544]	Q66HF9 1xPhospho [T539(99.5)]	0	1315.69	Q66HF9	Leucine-rich repeat flightless-interacting protein 1 [OS=Rattus norvegicus]	Lrrfip1	0.293742	-0.186599	-0.812924	-1.08788	0.208731	0.5749	0.0223	0.0101	0.470453	0.508179	0.622934	1	0.892753	0.784439	0.001469	0.01544	2.25
[K].VQDKPESPSGSTQIQR.[Y]	1xTMT6plex [K4]; 1xTMT6plex [N-Term]; 1xPhospho [S7(100)]	3.53439e-06	7.97536e-05	1	1	1	21	Q63358	Q63358 [1260-1275]	Q63358 1xPhospho [S1266(100)]	0	2295.17	Q63358	Unconventional myosin-IXb [OS=Rattus norvegicus]	Myo9b	0.36002	0.474025	-0.812922	-0.78044	0.343806	0.0192	0.0224	0.0319	0.432883	0.409817	0.525978	0.743543	0.719953	1	1.072e-05	1.729e-07	4.75
[R].HAHSPTR.[A]	1xTMT6plex [N-Term]; 1xPhospho [S4(100)]	0.013502	0.00128835	1	4	1	5	Q66H54	Q66H54 [687-693]	Q66H54 1xPhospho [S690(100)]	0	1114.54	Q66H54	FTS and Hook-interacting protein [OS=Rattus norvegicus]	Fam160a2	0.328275	0.270376	0.342253	0.480216	0.275233	0.1253	0.0226	0.0098	0.85653	0.796488	1	0.614021	0.628277	0.757779	0.0004581	0.004269	2.34
[R].AASVSSLHER.[I]	1xTMT6plex [N-Term]; 1xPhospho [S3(100)]	0.000338719	7.97536e-05	1	1	1	3	P33173	P33173 [414-423]	P33173 1xPhospho [S416(100)]	0	1365.67	P33173	Kinesin-like protein KIF1A [OS=Mus musculus]	Kif1a	0.134123	0.0867881	-0.808384	-0.779894	0.0277509	0.5045	0.0227	0.032	0.517084	0.537683	0.590067	0.887836	0.941617	1	1.072e-05	4.736e-05	3.18
[R].ELSAERPLNEQIAEAEADK.[I]	1xTMT6plex [K19]; 1xTMT6plex [N-Term]; 1xPhospho [S3(100)]	3.33385e-07	7.97536e-05	1	3	1	10	P47868	P47868 [38-56]	P47868 1xPhospho [S40(100)]	0	2651.33	P47868	Secretogranin-3 [OS=Rattus norvegicus]	Scg3	0.551498	-0.107723	-0.805552	-0.781475	0.92336	0.8134	0.023	0.0316	0.581772	0.550786	0.807236	1	0.962672	0.893409	1.072e-05	9.585e-09	4.74
[K].HEVTGWVLVSPLSK.[E]	1xTMT6plex [K14]; 1xTMT6plex [N-Term]; 1xPhospho [S13(100)]	2.94477e-08	7.97536e-05	1	1	1	5	Q61581	Q61581 [226-239]	Q61581 1xPhospho [S238(100)]	0	2090.15	Q61581	Insulin-like growth factor-binding protein 7 [OS=Mus musculus]	Igfbp7	0.303306	-0.0312801	-0.804327	-1.14913	0.227165	0.9131	0.0232	0.0082	0.450896	0.492353	0.607549	1	0.859812	0.84137	1.072e-05	4.886e-10	4.66
[K].EKTPSPKEEDEEAESPPEK.[K]	3xTMT6plex [K2; K7; K19]; 1xTMT6plex [N-Term]; 2xPhospho [T3(100); S5(100)]	0.118057	0.00902484	1	2	1	1	Q9EPJ0	Q9EPJ0 [200-218]	Q9EPJ0 2xPhospho [T202(100); S204(100)]	2	3232.57	Q9EPJ0	Nuclear ubiquitous casein and cyclin-dependent kinase substrate 1 [OS=Rattus norvegicus]	Nucks1	1.37308	-0.388979	-0.803497	-1.05153	2.65758	0.2006	0.0233	0.0111	0.390655	0.386066	1	0.809724	0.673811	0.514569	0.00378	0.05867	4.14
[R].SVDALDDINRPGSTESGR.[S]	1xTMT6plex [N-Term]; 1xPhospho [T14(99.2)]	8.64963e-08	7.97536e-05	1	6	2	15	Q9WU74-1	Q9WU74-1 [436-453]	Q9WU74-1 1xPhospho [T449(99.2)]	0	2198.03	Q9WU74-1	Lipolysis-stimulated lipoprotein receptor [OS=Rattus norvegicus]	Lsr	0.801326	-0.428552	-0.801461	-0.812724	1.61798	0.1619	0.0234	0.0275	0.569306	0.519532	0.90539	1	0.905474	0.672774	1.072e-05	1.828e-09	6.31
[R].ARSHSPSSPER.[N]	1xTMT6plex [N-Term]; 4xPhospho [S3(100); S5(100); S7(100); S8(100)]	0.0226472	0.00188966	1	3	1	3	Q8BTI8	Q8BTI8 [1451-1461]	Q8BTI8 4xPhospho [S1453(100); S1455(100); S1457(100); S1458(100)]	1	1759.62	Q8BTI8	serine/arginine repetitive matrix protein 2 [OS=Mus musculus]	Srrm2	-0.255231	0.214653	-0.799274	-0.809079	0.677161	0.2027	0.0236	0.0283	0.417774	0.495196	0.414902	0.731979	0.861753	1	0.0007596	0.007046	2.37
[K].RSHPSGGSTK.[K]	1xTMT6plex [K10]; 1xTMT6plex [N-Term]; 1xPhospho [S5(100)]	0.0153923	0.00147619	1	2	1	1	A0MZ67	A0MZ67 [380-389]	A0MZ67 1xPhospho [S384(100)]	1	1551.8	A0MZ67	Shootin-1 [OS=Rattus norvegicus]	RGD1311558; Shtn1	0.49895	0.686417	-0.798703	-0.864797	0.745936	0.0026	0.0237	0.0219	0.371017	0.357219	0.504816	0.675654	0.621395	1	0.0005468	0.005551	3.4
[K].VGSLAGSSVFLNRSPSR.[C]	1xTMT6plex [N-Term]; 1xPhospho [S14(99)]	2.47574e-06	7.97536e-05	1	1	2	6	Q0GA42	Q0GA42 [716-732]	Q0GA42 1xPhospho [S729(99)]	1	2043.06	Q0GA42	Metal transporter CNNM1 [OS=Mus musculus]	Cnnm1	-0.207641	0.0327794	-0.798314	-0.709872	0.576918	0.6815	0.0238	0.0428	0.517569	0.562103	0.486754	0.846567	0.977535	1	1.072e-05	1.118e-07	4.58
[R].QYTSPEEIDAQLQAEK.[Q]	1xTMT6plex [K16]; 1xTMT6plex [N-Term]; 1xPhospho [T3(100)]	5.17834e-07	7.97536e-05	1	1	3	43	Q3UHX2	Q3UHX2 [16-31]	Q3UHX2 1xPhospho [T18(100)]	0	2388.17	Q3UHX2	28 kDa heat- and acid-stable phosphoprotein [OS=Mus musculus]	Pdap1	0.0786219	-0.372247	-0.787046	-0.918434	0.0971272	0.22	0.0245	0.0179	0.529083	0.567313	0.599088	1	0.97892	0.756293	1.072e-05	1.64e-08	6.24
[K].NSDLLTSPDVGLLK.[L]	1xTMT6plex [K14]; 1xTMT6plex [N-Term]; 1xPhospho [S7(100)]	0.000356228	7.97536e-05	1	2	2	4	P05627	P05627 [57-70]	P05627 1xPhospho [S63(100)]	0	2010.09	P05627	transcription factor AP-1 [OS=Mus musculus]	Jun	0.00541365	-0.439661	-0.786426	-0.755852	0.207118	0.1525	0.0246	0.035	0.564479	0.579779	0.581958	0.953195	1	0.737308	1.072e-05	5.036e-05	2.68
[R].RPSESDKEEELEK.[V]	2xTMT6plex [K7; K13]; 1xTMT6plex [N-Term]; 1xPhospho [S3(100)]	1.62688e-05	7.97536e-05	1	3	2	26	Q5QD51-1	Q5QD51-1 [612-624]	Q5QD51-1 1xPhospho [S614(100)]	1	2343.2	Q5QD51-1	A-kinase anchor protein 12 [OS=Rattus norvegicus]	Akap12	0.330479	0.028662	-0.783985	-0.828384	0.279675	0.697	0.0251	0.0256	0.56316	0.536414	0.674504	1	0.923641	0.942175	1.072e-05	1.124e-06	4.82
[K].LQYSGEK.[L]	1xTMT6plex [K7]; 1xTMT6plex [N-Term]; 1xPhospho [S4(100)]	0.0509222	0.00375374	1	2	1	2	Q8R553	Q8R553 [206-212]	Q8R553 1xPhospho [S209(100)]	0	1362.71	Q8R553	Calsyntenin-3 [OS=Rattus norvegicus]	Clstn3	0.386827	0.0288133	-0.779839	-0.792641	0.408935	0.6964	0.0253	0.0305	0.569114	0.570915	0.74648	0.985844	0.980226	1	0.001425	0.01493	2.24
[R].GMSHSPSVALR.[G]	1xOxidation [M2]; 1xTMT6plex [N-Term]; 1xPhospho [S5(98.6)]	0.0299257	0.00252435	1	1	1	2	P48437	P48437 [175-185]	P48437 1xPhospho [S179(98.6)]	0	1466.7	P48437	Prospero homeobox protein 1 [OS=Mus musculus]	Prox1	0.0927077	0.180425	-0.777855	-0.86144	0.0782095	0.2631	0.0254	0.0224	0.516948	0.51467	0.548829	0.939218	0.882443	1	0.001019	0.009176	2.34
[K].AVEEPLNAFKESK.[G]	2xTMT6plex [K10; K13]; 1xTMT6plex [N-Term]; 1xPhospho [S12(100)]	7.36719e-05	7.97536e-05	1	1	1	4	P97829-2	P97829-2 [300-312]	P97829-2 1xPhospho [S311(100)]	1	2229.21	P97829-2	Isoform 2 of Leukocyte surface antigen CD47 [OS=Rattus norvegicus]	Cd47	0.28429	-0.186226	-0.777555	-0.873029	0.19044	0.5757	0.0255	0.0212	0.543709	0.583355	0.710416	0.995804	1	0.878902	1.072e-05	7.17e-06	3.5
[K].EIPSPEMETPAQK.[T]	1xTMT6plex [K13]; 1xTMT6plex [N-Term]; 1xPhospho [S4(100)]	4.59651e-05	7.97536e-05	1	1	1	6	Q63358	Q63358 [1112-1124]	Q63358 1xPhospho [S1115(100)]	0	1994.99	Q63358	Unconventional myosin-IXb [OS=Rattus norvegicus]	Myo9b	0.366372	0.190626	-0.77338	-0.681308	0.360912	0.2424	0.0258	0.0495	0.554586	0.512632	0.660837	0.88933	0.876226	1	1.072e-05	4.014e-06	4.54
[K].TTTTPEVK.[A]	1xTMT6plex [K8]; 1xTMT6plex [N-Term]; 1xPhospho [T4(100)]	0.0187607	0.00150532	2	2	3	9	P14873; P15205	P14873 [2298-2305]; P15205 [2293-2300]	P14873 1xPhospho [T2301(100)]; P15205 1xPhospho [T2296(100)]	0	1414.76	P14873	microtubule-associated protein 1B [OS=Mus musculus]	Map1b; Mtap1b	0.628725	0.258619	0.323428	0.457463	1.19044	0.1403	0.0263	0.0118	0.703055	0.646748	1	0.512011	0.51686	0.618337	0.000608	0.005911	2.56
[R].GYQALSDSSPGPR.[V]	1xTMT6plex [N-Term]; 1xPhospho [S9(99.3)]	1.381e-05	7.97536e-05	1	1	3	13	Q62179	Q62179 [772-784]	Q62179 1xPhospho [S780(99.3)]	0	1643.76	Q62179	Semaphorin-4B [OS=Mus musculus]	Sema4b	0.247321	-0.14157	-0.770506	-0.743276	0.12384	0.7057	0.0264	0.0371	0.597381	0.579003	0.687277	1	0.987703	0.895384	1.072e-05	9.173e-07	4.54
[K].LVGGTTPGK.[G]	1xTMT6plex [K9]; 1xTMT6plex [N-Term]; 1xPhospho [T6(100)]	0.00166553	0.00046153	1	2	2	3	Q9WUM5	Q9WUM5 [82-90]	Q9WUM5 1xPhospho [T87(100)]	0	1367.77	Q9WUM5	Succinate--CoA ligase [ADP/GDP-forming] subunit alpha, mitochondrial [OS=Mus musculus]	Suclg1	0.0603337	0.0570272	0.322415	0.547836	0.122974	0.6022	0.0267	0.0053	1	0.884925	0.922717	0.684045	0.707701	0.736235	6.971e-05	0.0003662	2.48
[K].RQEHLSRFSMPDLSK.[D]	1xOxidation [M10]; 1xTMT6plex [K15]; 1xTMT6plex [N-Term]; 1xPhospho [S]	0.109403	0.00790655	1	1	1	1	Q80Y24	Q80Y24 [564-578]		2	2385.22	Q80Y24	Prickle-like protein 2 [OS=Mus musculus]	Prickle2	-0.0722265	0.153769	0.322121	0.332684	0.330869	0.3232	0.0268	0.0389	0.944655	1	0.951169	0.750111	0.799893	0.889859	0.002475	0.03046	1.33
[K].STPDLLR.[D]	1xTMT6plex [N-Term]; 1xPhospho [S1(100)]	0.0436228	0.00312817	1	2	1	3	P59242	P59242 [282-288]	P59242 1xPhospho [S282(100)]	0	1110.58	P59242	cingulin [OS=Mus musculus]	Cgn	-0.0573805	-0.000430903	-0.768519	-1.02112	0.307153	0.799	0.0269	0.0122	0.492733	0.562162	0.540241	1	0.957654	0.957368	0.00125	0.01294	2.85
[K].TLSLVK.[E]	1xTMT6plex [K6]; 1xTMT6plex [N-Term]; 1xPhospho [S3(100)]	0.0386547	0.00287859	1	2	1	4	Q9CR89-1	Q9CR89-1 [9-14]	Q9CR89-1 1xPhospho [S11(100)]	0	1198.72	Q9CR89-1	Endoplasmic reticulum-Golgi intermediate compartment protein 2 [OS=Mus musculus]	Ergic2	0.0598535	-0.157076	0.321326	0.319828	0.123436	0.6571	0.027	0.0433	0.949895	0.959362	1	0.761023	0.767809	0.688603	0.001172	0.0116	2.4
[R].EMAPQSVSPR.[E]	1xTMT6plex [N-Term]; 1xPhospho [S6(99.3)]	0.000487949	7.97536e-05	1	1	1	4	P48437	P48437 [192-201]	P48437 1xPhospho [S197(99.3)]	0	1410.66	P48437	Prospero homeobox protein 1 [OS=Mus musculus]	Prox1	0.179408	-0.0505174	-0.764084	-0.803678	0.0289562	0.9828	0.0272	0.0292	0.572887	0.585246	0.662743	1	0.993918	0.959717	1.072e-05	7.465e-05	3.33
[R].SDLSLGSR.[G]	1xTMT6plex [N-Term]; 1xPhospho [S4(100)]	0.0417153	0.0030278	1	1	1	1	Q91ZR2	Q91ZR2 [190-197]	Q91ZR2 1xPhospho [S193(100)]	0	1143.56	Q91ZR2	Sorting nexin-18 [OS=Mus musculus]	Snx18	0.424364	-0.108549	0.319714	0.339837	0.510745	0.8102	0.0274	0.0365	0.852514	0.745167	1	0.673597	0.597049	0.553776	0.001225	0.01242	1.84
[R].SGYSERSR.[H]	1xTMT6plex [N-Term]; 1xPhospho [S7(100)]	0.0179115	0.00145239	1	1	1	2	Q9Z0U1	Q9Z0U1 [130-137]	Q9Z0U1 1xPhospho [S136(100)]	1	1250.57	Q9Z0U1	Tight junction protein ZO-2 [OS=Mus musculus]	Tjp2	-0.00869171	-0.227612	-0.762265	-0.716279	0.229664	0.4696	0.0275	0.0416	0.608665	0.52566	0.522502	1	0.891599	0.761468	0.0005808	0.005653	1.64
[R].ISFSTSDVSKLSPVK.[T]	2xTMT6plex [K10; K15]; 1xTMT6plex [N-Term]; 1xPhospho [S12(99.4)]	8.43441e-05	7.97536e-05	1	1	1	2	Q63358	Q63358 [1326-1340]	Q63358 1xPhospho [S1337(99.4)]	1	2362.32	Q63358	Unconventional myosin-IXb [OS=Rattus norvegicus]	Myo9b	0.496953	-0.205683	-0.749949	-0.72715	0.738024	0.5209	0.0292	0.0401	0.604096	0.569332	0.803458	1	0.957464	0.830244	1.072e-05	8.46e-06	3.39
[K].GAMDSQFANEDAESQK.[F]	1xOxidation [M3]; 1xTMT6plex [K16]; 1xTMT6plex [N-Term]; 1xPhospho [S14(100)]	1.30628e-07	7.97536e-05	1	1	1	29	Q9EQ25	Q9EQ25 [36-51]	Q9EQ25 1xPhospho [S49(100)]	0	2282	Q9EQ25	Sodium-coupled neutral amino acid transporter 4 [OS=Rattus norvegicus]	Slc38a4	-0.387133	-0.667825	-0.748795	-0.902409	0.920096	0.0485	0.0293	0.0185	0.534993	0.496034	0.379291	1	0.833529	0.524669	1.072e-05	3.04e-09	5.51
[R].RSSAVKPEGEHPEPEHSK.[R]	2xTMT6plex [K6; K18]; 1xTMT6plex [N-Term]; 1xPhospho [S]	1.46504e-06	7.97536e-05	1	1	1	4	Q921D9-1	Q921D9-1 [75-92]		1	2768.43	Q921D9-1	Grainyhead-like protein 1 homolog [OS=Mus musculus]	Grhl1	0.0424436	-0.269807	-0.748778	-0.718996	0.149599	0.3756	0.0294	0.041	0.604001	0.595107	0.612875	0.994208	1	0.82943	1.072e-05	5.888e-08	4.79
[K].EFLEPDSWETLDQQQLFTEEELK.[E]	1xTMT6plex [K23]; 1xTMT6plex [N-Term]; 1xPhospho [S7(100)]	1.19504e-07	7.97536e-05	1	1	2	23	Q9JI85	Q9JI85 [326-348]	Q9JI85 1xPhospho [S332(100)]	0	3392.62	Q9JI85	Nucleobindin-2 [OS=Rattus norvegicus]	Nucb2	0.486688	-0.294693	-0.740765	-0.6958	0.709743	0.3317	0.0303	0.0461	0.617367	0.597947	0.837858	1	0.999206	0.814599	1.072e-05	2.726e-09	6.38
[K].SHSSPGSSK.[S]	1xTMT6plex [K9]; 1xTMT6plex [N-Term]; 1xPhospho [S4(100)]	0.000272922	7.97536e-05	2	5	2	12	Q9QYX7-1; Q9JKS6	Q9QYX7-1 [4803-4811]; Q9JKS6 [4820-4828]	Q9QYX7-1 1xPhospho [S4806(100)]; Q9JKS6 1xPhospho [S4823(100)]	0	1411.7	Q9QYX7-1	Protein piccolo [OS=Mus musculus]	Pclo	0.146632	0.402018	0.308729	0.483405	0.0125125	0.038	0.0304	0.0093	0.994656	0.903357	1	0.711465	0.729328	0.963701	1.072e-05	3.611e-05	3.09
[K].KLSSWDQAETPGHTPSLR.[W]	1xTMT6plex [K1]; 1xTMT6plex [N-Term]; 2xPhospho [T10(100); T14(97.7)]	0.0019464	0.00046153	1	1	1	1	Q99NB9	Q99NB9 [214-231]	Q99NB9 2xPhospho [T223(100); T227(97.7)]	1	2628.26	Q99NB9	splicing factor 3B subunit 1 [OS=Mus musculus]	Sf3b1	0.753423	-0.011368	-0.736056	-0.724218	1.50446	0.8391	0.0307	0.0404	0.605325	0.56773	0.957072	1	0.94562	0.938199	6.971e-05	0.0004498	4.16
[K].LCLSTVDLEVK.[C]	1xCarbamidomethyl [C2]; 1xTMT6plex [K11]; 1xTMT6plex [N-Term]; 1xPhospho [S4(100)]	7.9382e-05	7.97536e-05	1	1	2	8	Q8CGA3	Q8CGA3 [294-304]	Q8CGA3 1xPhospho [S297(100)]	0	1814.97	Q8CGA3	Large neutral amino acids transporter small subunit 4 [OS=Mus musculus]	Slc43a2	0.334407	0.421737	-0.733578	-1.05803	0.288868	0.032	0.0308	0.0108	0.39823	0.448968	0.566086	0.82915	0.746525	1	1.072e-05	7.833e-06	3.68
[R].QHSDPGGAR.[A]	1xTMT6plex [N-Term]; 1xPhospho [S3(100)]	0.0178084	0.00145239	1	1	1	3	Q66L44	Q66L44 [582-590]	Q66L44 1xPhospho [S584(100)]	0	1233.56	Q66L44	Voltage-dependent calcium channel beta subunit-associated regulatory protein [OS=Mus musculus]	Dos; Cbarp	-0.184662	-0.405648	-0.732226	-0.926541	0.533281	0.1821	0.031	0.0169	0.526118	0.500018	0.439943	1	0.83063	0.62704	0.0005737	0.005603	1.76
[K].DDDGQSESQAVNGK.[T]	1xTMT6plex [K14]; 1xTMT6plex [N-Term]; 2xPhospho [S6(100); S8(100)]	3.42366e-05	7.97536e-05	1	1	1	2	P10354	P10354 [281-294]	P10354 2xPhospho [S286(100); S288(100)]	0	2067.87	P10354	Chromogranin-A [OS=Rattus norvegicus]	Chga	0.57072	-0.30651	-0.727744	-0.786881	0.991826	0.3118	0.0316	0.0309	0.579596	0.512311	0.760917	1	0.848411	0.686022	1.072e-05	2.799e-06	3.79
[R].YLSGSGR.[E]	1xTMT6plex [N-Term]; 1xPhospho [S3(100)]	0.0568896	0.00447911	1	2	2	3	Q7TSU1	Q7TSU1 [1020-1026]	Q7TSU1 1xPhospho [S1022(100)]	0	1048.5	Q7TSU1	Brefeldin A-inhibited guanine nucleotide-exchange protein 2 [OS=Rattus norvegicus]	Arfgef2	0.105147	-0.000984243	-0.725718	-0.9928	0.063436	0.8005	0.0321	0.0133	0.502502	0.499551	0.53732	1	0.82612	0.825556	0.001555	0.01647	2.02
[R].GRPSKTPSPSQPK.[K]	2xTMT6plex [K5; K13]; 1xTMT6plex [N-Term]; 2xPhospho [S4(98.5); S/T]	0.00677458	0.000930136	1	2	2	3	Q6TRW4-1	Q6TRW4-1 [1375-1387]	Q6TRW4-1 2xPhospho [S1378(98.5); S/T]	1	2214.17	Q6TRW4-1	Sister chromatid cohesion protein PDS5 homolog B [OS=Rattus norvegicus]	Pds5b	0.513839	0.27202	0.301193	0.501185	0.799423	0.1236	0.0324	0.0078	0.767339	0.700356	1	0.542145	0.568396	0.686336	0.0002594	0.002081	3.26
[K].TLSQELVSLR.[G]	1xTMT6plex [N-Term]; 1xPhospho [S3(100)]	0.000625413	7.97536e-05	1	6	1	3	Q5HZI1	Q5HZI1 [892-901]	Q5HZI1 1xPhospho [S894(100)]	0	1454.78	Q5HZI1	Microtubule-associated tumor suppressor 1 homolog [OS=Mus musculus]	Mtus1	0.0914702	0.0459976	0.299167	0.310103	0.079355	0.6378	0.0329	0.0482	0.818816	0.938566	1	0.660444	0.762793	0.787505	1.072e-05	0.000102	2.81
[R].TGSPLTVATGNDQAATEAK.[I]	1xTMT6plex [K19]; 1xTMT6plex [N-Term]; 1xPhospho [S3(100)]	4.91874e-09	7.97536e-05	1	4	1	12	P0DJJ3	P0DJJ3 [263-281]	P0DJJ3 1xPhospho [S265(100)]	0	2370.2	P0DJJ3	SH3-containing GRB2-like protein 3-interacting protein 1 [OS=Rattus norvegicus]	Sgip1	-0.0461246	-0.18837	-0.716461	-0.80372	0.287771	0.5686	0.0339	0.0291	0.57287	0.555551	0.538071	1	0.912852	0.801116	1.072e-05	5.468e-11	6.01
[R].GLSLDQPK.[E]	1xTMT6plex [K8]; 1xTMT6plex [N-Term]; 1xPhospho [S3(100)]	0.0152672	0.00128835	1	1	1	4	Q6P777	Q6P777 [166-173]	Q6P777 1xPhospho [S168(100)]	0	1395.76	Q6P777	Multivesicular body subunit 12A [OS=Rattus norvegicus]	Fam125a; Mvb12a	-0.163601	-0.0319502	0.296822	0.339903	0.493901	0.9163	0.034	0.0364	0.885119	1	0.892794	0.699328	0.814044	0.796214	0.0005047	0.004831	2.76
[R].KESQHEEEGKEELHEEDGK.[E]	3xTMT6plex [K1; K10; K19]; 1xTMT6plex [N-Term]; 1xPhospho [S3(100)]	4.10866e-05	7.97536e-05	1	1	1	3	B4F777	B4F777 [234-252]	B4F777 1xPhospho [S236(100)]	2	3263.62	B4F777	High mobility group nucleosome-binding domain-containing protein 5 [OS=Rattus norvegicus]	Hmgn5; Hmgn5b; Nsbp1_predicted	-0.105345	0.0510355	-0.714831	-1.27378	0.389446	0.6219	0.0342	0.006	0.413574	0.487904	0.453547	1	0.800793	0.829628	1.072e-05	3.489e-06	4.75
[K].SGIRTDSREDEISPPPPNPVVK.[G]	1xTMT6plex [K22]; 1xTMT6plex [N-Term]; 1xPhospho [S7(100)]	0.000142908	5.91125e-05	1	1	1	2	P09456	P09456 [71-92]	P09456 1xPhospho [S77(100)]	2	2928.52	P09456	cAMP-dependent protein kinase type I-alpha regulatory subunit [OS=Rattus norvegicus]	Prkar1a	0.610613	-0.33858	0.295927	0.507978	1.12784	0.2609	0.0344	0.0072	0.778118	0.654918	1	0.547178	0.533463	0.421873	5.611e-05	0.0001036	5.45
[K].RPSSSASTK.[DV]	1xTMT6plex [K9]; 1xTMT6plex [N-Term]; 1xPhospho [S3(98.9)]	0.00871396	0.00109238	2	7	3	6	Q62417-2; Q62417	Q62417-2 [407-415]; Q62417 [468-476]	Q62417-2 1xPhospho [S409(98.9)]; Q62417 1xPhospho [S470(98.9)]	0	1458.77	Q62417-2	Isoform 2 of Sorbin and SH3 domain-containing protein 1 [OS=Mus musculus]	Sorbs1	0.238321	0.11652	-0.71434	-0.793417	0.11053	0.4175	0.0345	0.0304	0.576976	0.505802	0.596654	1	0.829886	0.899693	0.0003256	0.002727	2.53
[R].WRHPTQEGEQER.[L]	1xTMT6plex [N-Term]; 1xPhospho [T5(100)]	0.000561412	7.97536e-05	1	1	1	6	Q5RKH7	Q5RKH7 [348-359]	Q5RKH7 1xPhospho [T352(100)]	1	1861.85	Q5RKH7	Solute carrier family 35 member F6 [OS=Rattus norvegicus]	RGD1309228; Slc35f6	0.562772	0.336141	-0.712136	-0.826631	0.96138	0.0679	0.035	0.0259	0.469091	0.483545	0.714247	0.831951	0.792158	1	1.072e-05	8.929e-05	3.7
[R].SYSVVASEYDK.[Q]	1xTMT6plex [K11]; 1xTMT6plex [N-Term]; 1xPhospho [S3(99.5)]	0.000351367	7.97536e-05	1	2	2	5	Q7TPH6	Q7TPH6 [3510-3520]	Q7TPH6 1xPhospho [S3512(99.5)]	0	1785.87	Q7TPH6	E3 ubiquitin-protein ligase MYCBP2 [OS=Mus musculus]	Mycbp2	0.266359	0.174907	-0.709992	-1.08376	0.15602	0.2752	0.0353	0.0102	0.471798	0.490149	0.589536	1	0.801783	0.905126	1.072e-05	4.955e-05	3.55
[K].QIQTSPVPVRK.[N]	1xTMT6plex [K11]; 1xTMT6plex [N-Term]; 1xPhospho [T/S]	0.0171058	0.00145239	1	1	1	3	Q7TSJ6	Q7TSJ6 [530-540]		1	1791.03	Q7TSJ6	Serine/threonine-protein kinase LATS2 [OS=Mus musculus]	Lats2	0.182489	0.123817	0.293128	0.563307	0.0324988	0.3979	0.0355	0.0043	0.980047	0.881181	1	0.663246	0.719159	0.783605	0.0005456	0.005402	1.7
[R].EMSQGDASPR.[R]	1xTMT6plex [N-Term]; 1xPhospho [S8(98.8)]	0.00174449	0.00046153	1	2	1	3	Q00900	Q00900 [2090-2099]	Q00900 1xPhospho [S2097(98.8)]	0	1386.59	Q00900	Human immunodeficiency virus type I enhancer-binding protein 2 homolog [OS=Rattus norvegicus]	Hivep2	-0.175746	0.508914	-0.706025	-0.899456	0.516984	0.015	0.036	0.0189	0.365799	0.430791	0.381383	0.682347	0.702751	1	6.971e-05	0.0003884	2.29
[R].DNMVLIDSDDESDSGMASQADQK.[E]	1xTMT6plex [K23]; 1xTMT6plex [N-Term]; 2xPhospho [S8(100); S14(98.5)]	1.27534e-05	7.97536e-05	1	1	1	1	Q8BZQ7	Q8BZQ7 [740-762]	Q8BZQ7 2xPhospho [S747(100); S753(98.5)]	0	3089.28	Q8BZQ7	anaphase-promoting complex subunit 2 [OS=Mus musculus]	Anapc2	0.25368	0.311234	-0.705593	-0.718173	0.134186	0.0875	0.0362	0.0411	0.475864	0.494202	0.58921	0.782843	0.805952	1	1.072e-05	8.304e-07	4.05
[R].LLQQQSLPQTGEQELESLVLK.[L]	1xTMT6plex [K21]; 1xTMT6plex [N-Term]; 1xPhospho [S6(100)]	0.000337169	7.97536e-05	1	3	1	3	Q9WVR3-1	Q9WVR3-1 [247-267]	Q9WVR3-1 1xPhospho [S252(100)]	0	2919.58	Q9WVR3-1	Phosphatidylinositol 3,4,5-trisphosphate 5-phosphatase 2 [OS=Rattus norvegicus]	Inppl1	0.441741	0.31698	0.291528	0.315402	0.560825	0.0818	0.0363	0.0457	0.670955	0.736246	1	0.539197	0.601539	0.74935	1.072e-05	4.701e-05	3.15
[R].SRSGEGEVSGLMR.[K]	1xTMT6plex [N-Term]; 1xPhospho [S3(100)]	0.115768	0.00885685	1	1	1	1	O08629	O08629 [472-484]	O08629 1xPhospho [S474(100)]	1	1673.79	O08629	Transcription intermediary factor 1-beta [OS=Rattus norvegicus]	Trim28	-0.713902	0.176388	0.290633	0.333103	1.36754	0.2711	0.0367	0.0388	1	0.894829	0.54555	0.793827	0.731562	0.826703	0.003706	0.05726	3
[R].QTCEEDLDTQDEEDKDDLTK.[K]	1xCarbamidomethyl [C3]; 2xTMT6plex [K15; K20]; 1xTMT6plex [N-Term]; 1xPhospho [T9(100)]	0.000774631	7.97536e-05	1	1	1	1	Q566R3	Q566R3 [331-350]	Q566R3 1xPhospho [T339(100)]	1	3194.45	Q566R3	G patch domain-containing protein 4 [OS=Rattus norvegicus]	Gpatch4	-0.306887	0.17373	-0.703087	-0.702316	0.774432	0.2777	0.0369	0.0446	0.546017	0.544567	0.44022	0.888433	0.886547	1	1.072e-05	0.0001343	2.72
[R].LSTHPSK.[D]	1xTMT6plex [K7]; 1xTMT6plex [N-Term]; 1xPhospho [S6(100)]	0.0351712	0.0026668	1	1	1	1	P42335	P42335 [228-234]	P42335 1xPhospho [S233(100)]	0	1307.71	P42335	inositol-trisphosphate 3-kinase B [OS=Rattus norvegicus]	Itpkb	-0.164235	0.192062	0.28884	0.560981	0.495665	0.2404	0.0376	0.0045	1	0.909111	0.811292	0.677841	0.744162	0.850128	0.001111	0.01062	2.12
[K].DDYLETLSSPK.[E]	1xTMT6plex [K11]; 1xTMT6plex [N-Term]; 1xPhospho [S9(100)]	0.000168726	7.97536e-05	1	4	2	15	P0DJJ3	P0DJJ3 [390-400]	P0DJJ3 1xPhospho [S398(100)]	0	1805.9	P0DJJ3	SH3-containing GRB2-like protein 3-interacting protein 1 [OS=Rattus norvegicus]	Sgip1	-0.258446	-0.395083	-0.698029	-1.11379	0.682773	0.1944	0.0377	0.0092	0.462079	0.546714	0.457046	1	0.886926	0.674459	1.072e-05	1.994e-05	3.2
[K].LQSADASPR.[R]	1xTMT6plex [N-Term]; 1xPhospho [S7(100)]	0.00420879	0.000769263	1	3	1	1	Q9Z0F1	Q9Z0F1 [175-183]	Q9Z0F1 1xPhospho [S181(100)]	0	1253.61	Q9Z0F1	neuroendocrine secretory protein 55 [OS=Mus musculus]	Gnas	1.05673	-0.195504	0.28587	0.491778	2.16749	0.547	0.0381	0.0085	0.570547	0.480721	1	0.405744	0.39431	0.344338	0.000151	0.0012	2.2
[K].EGMSNNSTTSISQAR.[K]	1xTMT6plex [N-Term]; 1xPhospho [T8(99.2)]	3.95491e-06	7.97536e-05	1	1	3	4	P50153	P50153 [3-17]	P50153 1xPhospho [T10(99.2)]	0	1891.84	P50153	Guanine nucleotide-binding protein G(I)/G(S)/G(O) subunit gamma-4 [OS=Mus musculus]	Gng4	-0.388999	-0.0985335	0.285047	0.61352	0.922632	0.8471	0.0385	0.003	1	0.884698	0.675608	0.6536	0.726085	0.67815	1.072e-05	1.979e-07	3.44
[K].SYSSTLR.[G]	1xTMT6plex [N-Term]; 1xPhospho [T5(100)]	0.053993	0.00412092	1	1	2	2	Q7TPM9	Q7TPM9 [575-581]	Q7TPM9 1xPhospho [T579(100)]	0	1122.54	Q7TPM9	myotubularin-related protein 10 [OS=Mus musculus]	Mtmr10	0.0893235	-0.0798109	0.282494	0.414136	0.082547	0.9116	0.039	0.0176	1	0.83426	0.887545	0.750469	0.685902	0.648988	0.00148	0.01571	2.11
[K].LSPSPSSR.[VI]	1xTMT6plex [N-Term]; 1xPhospho [S4(100)]	0.0266421	0.00232722	2	4	3	8	P14733; P70615	P14733 [391-398]; P70615 [390-397]	P14733 1xPhospho [S394(100)]; P70615 1xPhospho [S393(100)]	0	1139.57	P14733	Lamin-B1 [OS=Mus musculus]	Lmnb1	0.0849109	0.186525	0.281046	0.473062	0.0881502	0.2517	0.0395	0.0103	1	0.914957	0.970424	0.720434	0.753005	0.856934	0.0008999	0.00822	1.94
[K].AGRPRSEEDNELNLPNLAAAYSSILR.[S]	1xTMT6plex [N-Term]; 1xPhospho [S6(100)]	3.28792e-11	7.97536e-05	1	1	1	12	P22288	P22288 [46-71]	P22288 1xPhospho [S51(100)]	1	3165.59	P22288	GTP cyclohydrolase 1 [OS=Rattus norvegicus]	Gch1	0.219992	-0.0568419	0.27863	0.541989	0.0812883	0.9938	0.0408	0.0056	0.966093	0.85857	1	0.663535	0.707782	0.680438	1.072e-05	1.182e-13	7.65
[R].SDSDYDLSPK.[SA]	1xTMT6plex [K10]; 1xTMT6plex [N-Term]; 2xPhospho [S3(99.4); S8(100)]	0.00680802	0.000930136	1	12	1	3	P14270	P14270 [190-199]	P14270 2xPhospho [S192(99.4); S197(100)]	0	1744.75	P14270	cAMP-specific 3',5'-cyclic phosphodiesterase 4D [OS=Rattus norvegicus]	Pde4d	-0.211196	-0.207092	0.277706	0.469857	0.583692	0.5165	0.041	0.0105	1	0.947641	0.818592	0.722036	0.78171	0.677182	0.0002594	0.002091	3.19
[KVRL].RTHTGEK.[KPR]	1xTMT6plex [K7]; 1xTMT6plex [N-Term]; 1xPhospho [T4(100)]	0.0474234	0.00355588	3	10	1	3	O89090; O08876; Q62445	O89090 [679-685]; O08876 [391-397]; [421-427]; Q62445 [697-703]	O89090 1xPhospho [T682(100)]; O08876 1xPhospho [T394(100)]; 1xPhospho [T424(100)]; Q62445 1xPhospho [T700(100)]	1	1366.72	O89090	Transcription factor Sp1 [OS=Mus musculus]	Sp1	0.139988	-0.0437197	0.277323	0.493105	0.0204972	0.9593	0.041	0.0084	0.956717	0.907527	1	0.679742	0.748819	0.726467	0.001371	0.01398	2.04
[R].QSMAFSILNTPK.[K]	1xTMT6plex [K12]; 1xTMT6plex [N-Term]; 1xPhospho [T10(100)]	0.000477	7.97536e-05	1	1	1	6	E9Q7G0	E9Q7G0 [2028-2039]	E9Q7G0 1xPhospho [T2037(100)]	0	1874.99	E9Q7G0	nuclear mitotic apparatus protein 1 [OS=Mus musculus]	Numa1	0.667962	0.120215	0.276862	0.375907	1.30277	0.4078	0.0412	0.0258	0.688118	0.629395	1	0.530278	0.519493	0.564635	1.072e-05	7.253e-05	2.91
[K].HRGSADYSMEAK.[K]	1xOxidation [M9]; 1xTMT6plex [K12]; 1xTMT6plex [N-Term]; 1xPhospho [S4(100)]	0.00160357	0.00046153	1	5	1	3	Q08122-1	Q08122-1 [213-224]	Q08122-1 1xPhospho [S216(100)]	1	1905.89	Q08122-1	Isoform 1 of Transducin-like enhancer protein 3 [OS=Mus musculus]	Tle3	0.0252921	-0.295952	-0.675896	-0.772267	0.175354	0.3295	0.0413	0.0328	0.54893	0.625943	0.637014	0.937546	1	0.814535	6.971e-05	0.0003483	2.84
[K].FAGEASIPSPKPK.[L]	2xTMT6plex [K11; K13]; 1xTMT6plex [N-Term]; 1xPhospho [S9(100)]	8.51345e-05	7.97536e-05	1	3	3	16	Q9QX27-1	Q9QX27-1 [684-696]	Q9QX27-1 1xPhospho [S692(100)]	0	2096.18	Q9QX27-1	suppression of tumorigenicity 18 protein [OS=Rattus norvegicus]	St18	0.287879	-0.0528909	0.276358	0.449708	0.19709	0.9916	0.0415	0.0125	0.901216	0.819106	1	0.659862	0.676313	0.651968	1.072e-05	8.579e-06	3.56
[R].HNSQGEAER.[G]	1xTMT6plex [N-Term]; 1xPhospho [S3(100)]	0.0193148	0.00161424	1	1	1	4	G3V9A7	G3V9A7 [290-298]	G3V9A7 1xPhospho [S292(100)]	0	1336.58	G3V9A7	Mitochondrial fission regulator 1 [OS=Rattus norvegicus]	Mtfr1	-0.077871	-0.267093	-0.67563	-0.703379	0.340084	0.3827	0.0416	0.0442	0.614132	0.588546	0.557621	1	0.940081	0.7812	0.0006277	0.00607	2.43
[K].KPSPFLSPSGDHEANGPGETSLNPPGFVTATAEK.[E]	2xTMT6plex [K1; K34]; 1xTMT6plex [N-Term]; 1xPhospho [S7(99.9)]	5.91665e-06	7.97536e-05	1	1	1	1	P34926	P34926 [2321-2354]	P34926 1xPhospho [S2327(99.9)]	0	4204.12	P34926	Microtubule-associated protein 1A [OS=Rattus norvegicus]	Map1a	0.407878	-0.0654575	-0.673519	-0.856999	0.466736	0.9634	0.0419	0.0227	0.5521	0.566066	0.751019	1	0.902851	0.862803	1.072e-05	3.242e-07	5.24
[R].SKDEEADSDNYEVLFNLEELK.[L]	2xTMT6plex [K2; K21]; 1xTMT6plex [N-Term]; 1xPhospho [S8(100)]	1.01662e-06	7.97536e-05	1	5	1	4	Q5HZA6	Q5HZA6 [131-151]	Q5HZA6 1xPhospho [S138(100)]	1	3254.6	Q5HZA6	prolyl endopeptidase-like [OS=Rattus norvegicus]	Prepl	0.266703	-0.10178	0.275019	0.658279	0.156456	0.8324	0.042	0.002	0.91792	0.831217	1	0.581625	0.68695	0.640157	1.072e-05	3.757e-08	4.89
[R].GSPGALSSDSELPENPYSQVK.[G]	1xTMT6plex [K21]; 1xTMT6plex [N-Term]; 2xPhospho [S2(100); S7(100)]	4.79399e-05	7.97536e-05	1	2	1	1	P59242	P59242 [83-103]	P59242 2xPhospho [S84(100); S89(100)]	0	2780.28	P59242	cingulin [OS=Mus musculus]	Cgn	0.1326	-0.447244	-0.672182	-0.68673	0.0297926	0.1464	0.0422	0.0481	0.578934	0.627557	0.68797	0.93187	1	0.733443	1.072e-05	4.227e-06	4.38
[K].GGETPGSEQWK.[F]	1xTMT6plex [K11]; 1xTMT6plex [N-Term]; 1xPhospho [T4(100)]	7.23095e-05	7.97536e-05	2	6	2	19	Q58A65; Q58A65-2	Q58A65 [223-233]; Q58A65-2 [223-233]	Q58A65 1xPhospho [T226(100)]; Q58A65-2 1xPhospho [T226(100)]	0	1713.82	Q58A65	C-jun-amino-terminal kinase-interacting protein 4 [OS=Mus musculus]	Spag9	0.132854	-0.0796898	-0.671827	-0.736926	0.0294672	0.9122	0.0425	0.0383	0.600016	0.5952	0.652613	1	0.948207	0.897251	1.072e-05	7.007e-06	3.62
[K].AADITTPK.[A]	1xTMT6plex [K8]; 1xTMT6plex [N-Term]; 1xPhospho [T6(100)]	0.0150115	0.00128835	1	2	2	6	Q812D1-1	Q812D1-1 [136-143]	Q812D1-1 1xPhospho [T141(100)]	0	1354.74	Q812D1-1	PC4 and SFRS1-interacting protein [OS=Rattus norvegicus]	Psip1	1.47707	0.350256	0.274192	0.763042	2.82391	0.0596	0.0426	0.0008	0.443693	0.359217	1	0.261447	0.297042	0.378665	0.0004989	0.004741	2.68
[R].VISTPPTPIFPISDDIGAIPIK.[H]	1xTMT6plex [K22]; 1xTMT6plex [N-Term]; 2xPhospho [S3(99.5); T/S]	2.2232e-08	7.97536e-05	1	3	3	8	Q62656	Q62656 [1682-1703]	Q62656 2xPhospho [S1684(99.5); T/S]	0	2909.55	Q62656	Receptor-type tyrosine-protein phosphatase zeta [OS=Rattus norvegicus]	Ptprz1	0.0296338	-0.348146	-0.669965	-0.78611	0.1673	0.2473	0.0431	0.0312	0.579906	0.597468	0.609867	1	0.950593	0.746779	1.072e-05	3.473e-10	5.3
[K].ENSGTGSTVR.[K]	1xTMT6plex [N-Term]; 1xPhospho [S/T]	0.017403	0.00145239	1	1	1	1	P0C6C0	P0C6C0 [965-974]		0	1316.6	P0C6C0	A-kinase anchor protein SPHKAP [OS=Rattus norvegicus]	Sphkap	1.31695	0.052479	-0.668921	-1.16846	2.58503	0.6179	0.0433	0.0077	0.353752	0.401384	1	0.795133	0.638153	0.661794	0.0005672	0.005475	2.37
[R].SHSSSQFR.[Y]	1xTMT6plex [N-Term]; 1xPhospho [S3(100)]	0.0226472	0.00188966	1	2	3	9	Q80W83	Q80W83 [44-51]	Q80W83 1xPhospho [S46(100)]	0	1244.56	Q80W83	Serine/threonine-protein phosphatase 2A 56 kDa regulatory subunit beta isoform [OS=Rattus norvegicus]	LOC100909468; Ppp2r5b	0.0240073	-0.0913915	-0.668756	-0.710225	0.177505	0.8698	0.0435	0.0424	0.604123	0.629049	0.639604	0.988381	1	0.938617	0.0007596	0.007045	2.26
[K].TQPVTFDEIQEVEEEGVSPMEEEK.[A]	1xTMT6plex [K24]; 1xTMT6plex [N-Term]; 2xPhospho [T1(100); S18(100)]	9.12882e-09	7.97536e-05	1	2	3	7	A8IHN8	A8IHN8 [175-198]	A8IHN8 2xPhospho [T175(100); S192(100)]	0	3397.51	A8IHN8	Uncharacterized protein C11orf96 homolog [OS=Rattus norvegicus]	RGD1564664	0.192817	-0.178824	-0.66463	-0.790305	0.0464336	0.5956	0.0443	0.0306	0.578222	0.593217	0.678044	1	0.940345	0.830722	1.072e-05	1.166e-10	7.59
[K].GDDLEEGVTSEEFDK.[F]	1xTMT6plex [K15]; 1xTMT6plex [N-Term]; 1xPhospho [S10(100)]	4.42779e-05	7.97536e-05	1	2	2	10	Q5SRX1	Q5SRX1 [448-462]	Q5SRX1 1xPhospho [S457(100)]	0	2208	Q5SRX1	TOM1-like protein 2 [OS=Mus musculus]	Tom1l2	0.154726	-0.0176915	-0.661446	-0.915125	0.00226422	0.8623	0.0452	0.0181	0.530298	0.565846	0.629906	1	0.89498	0.884072	1.072e-05	3.842e-06	3.29
[K].VLSPQKPTITLSAYQR.[K]	1xTMT6plex [K6]; 1xTMT6plex [N-Term]; 1xPhospho [S3(100)]	0.000122438	7.97536e-05	1	4	2	5	O08658	O08658 [697-712]	O08658 1xPhospho [S699(100)]	0	2340.31	O08658	Nuclear pore complex protein Nup88 [OS=Rattus norvegicus]	Nup88	0.392507	-0.2812	0.268922	0.369862	0.42412	0.355	0.0454	0.0274	0.826654	0.761805	1	0.639712	0.632252	0.520284	1.072e-05	1.336e-05	3.3
[K].GSSTPVKN.[-]	1xTMT6plex [K7]; 1xTMT6plex [N-Term]; 1xPhospho [T4(100)]	0.0143534	0.00128835	1	1	3	8	Q9WUB4	Q9WUB4 [183-190]	Q9WUB4 1xPhospho [T186(100)]	1	1327.7	Q9WUB4	Dynactin subunit 6 [OS=Mus musculus]	Dctn6	0.342585	0.172566	0.268864	0.406264	0.306713	0.28	0.0455	0.0186	0.835892	0.788627	1	0.630743	0.654539	0.737706	0.0004782	0.004544	2.36
[K].VQGSPLK.[K]	1xTMT6plex [K7]; 1xTMT6plex [N-Term]; 1xPhospho [S4(100)]	0.00844954	0.00104516	1	5	1	31	Q5QD51-1	Q5QD51-1 [497-503]	Q5QD51-1 1xPhospho [S500(100)]	0	1266.72	Q5QD51-1	A-kinase anchor protein 12 [OS=Rattus norvegicus]	Akap12	0.0185521	0.0644577	-0.660173	-0.786767	0.186352	0.5771	0.0459	0.031	0.579641	0.584821	0.59239	1	0.924176	0.966404	0.0003191	0.002634	2.67
[K].QQPLESPAHQK.[V]	1xTMT6plex [K11]; 1xTMT6plex [N-Term]; 1xPhospho [S6(100)]	0.00398698	0.000710363	1	1	1	1	A2AHC3-1	A2AHC3-1 [211-221]	A2AHC3-1 1xPhospho [S216(100)]	0	1800.94	A2AHC3-1	Calmodulin-regulated spectrin-associated protein 1 [OS=Mus musculus]	Camsap1	0.756546	-0.0116591	0.268081	0.391778	1.51145	0.8406	0.046	0.0218	0.611902	0.591912	1	0.466386	0.491537	0.487581	0.000135	0.001119	2.24
[K].EYESGDFQDFTR.[Q]	1xTMT6plex [N-Term]; 1xPhospho [S4(100)]	1.67322e-05	7.97536e-05	1	4	1	10	Q9JKC9-1	Q9JKC9-1 [994-1005]	Q9JKC9-1 1xPhospho [S997(100)]	0	1802.75	Q9JKC9-1	Synergin gamma [OS=Rattus norvegicus]	Synrg	-0.0227337	-0.0518852	-0.659799	-0.728194	0.25189	0.9883	0.0461	0.0398	0.603659	0.606296	0.596817	1	0.957863	0.924027	1.072e-05	1.165e-06	4.95
[R].RHSTSPSPSR.[S]	1xTMT6plex [N-Term]; 3xPhospho [S3(98.2); T4(98.2); S9(100)]	0.0834091	0.00587878	1	3	2	2	Q6NV83-1	Q6NV83-1 [928-937]	Q6NV83-1 3xPhospho [S930(98.2); T931(98.2); S936(100)]	1	1580.62	Q6NV83-1	U2 snRNP-associated SURP motif-containing protein [OS=Mus musculus]	U2surp	0.0280948	-0.00653674	-0.659211	-0.729994	0.17031	0.8208	0.0462	0.0392	0.589466	0.633225	0.645677	0.977707	1	0.995479	0.001975	0.02343	2.3
[K].ASPEPPDSAESALK.[L]	1xTMT6plex [K14]; 1xTMT6plex [N-Term]; 1xPhospho [S2(100)]	2.9168e-06	7.97536e-05	1	2	1	16	Q5EIC4	Q5EIC4 [533-546]	Q5EIC4 1xPhospho [S534(100)]	0	1936.97	Q5EIC4	interferon regulatory factor 2-binding protein-like [OS=Rattus norvegicus]	Irf2bpl	-0.115478	0.0389841	-0.654626	-0.888054	0.405166	0.6611	0.048	0.0196	0.540342	0.56703	0.523412	1	0.892623	0.917072	1.072e-05	1.365e-07	4.08
[K].SSIETKPDASPQLPK.[K]	2xTMT6plex [K6; K15]; 1xTMT6plex [N-Term]; 1xPhospho [S10(100)]	4.46938e-05	7.97536e-05	1	4	1	19	Q80TI0-1	Q80TI0-1 [265-279]	Q80TI0-1 1xPhospho [S274(100)]	0	2365.3	Q80TI0-1	GRAM domain-containing protein 1B [OS=Mus musculus]	Gramd1b	-0.257808	-0.0986213	-0.654137	-0.843996	0.681937	0.8468	0.0482	0.024	0.557099	0.604404	0.505497	1	0.951134	0.888288	1.072e-05	3.873e-06	4.36
[R].SGDPAPPDSPTWEAK.[K]	1xTMT6plex [K15]; 1xTMT6plex [N-Term]; 1xPhospho [S9(100)]	3.60123e-06	7.97536e-05	1	1	2	10	Q63624	Q63624 [512-526]	Q63624 1xPhospho [S520(100)]	0	2093	Q63624	Splicing factor, arginine/serine-rich 19 [OS=Rattus norvegicus]	Scaf1	-0.0562173	-0.214141	0.263958	0.337716	0.304606	0.5012	0.0489	0.037	0.945262	1	0.961783	0.74798	0.8328	0.717923	1.072e-05	1.767e-07	3.76
[K].SKSNPDFLK.[K]	2xTMT6plex [K2; K9]; 1xTMT6plex [N-Term]; 1xPhospho [S3(100)]	0.00061705	7.97536e-05	1	7	1	11	Q9ERE6	Q9ERE6 [995-1003]	Q9ERE6 1xPhospho [S997(100)]	1	1803	Q9ERE6	Myosin phosphatase Rho-interacting protein [OS=Rattus norvegicus]	Mprip	-0.0209309	-0.10812	0.263883	0.618364	0.248644	0.8116	0.0491	0.0029	1	0.811423	0.799736	0.651409	0.675788	0.626994	1.072e-05	0.0001002	3.12
[R].QRSPLSDYMNLDFSSPK.[S]	1xTMT6plex [K17]; 1xTMT6plex [N-Term]; 2xPhospho [S3(100); S15(99.2)]	4.5325e-05	7.97536e-05	1	1	1	2	P81122	P81122 [963-979]	P81122 2xPhospho [S965(100); S977(99.2)]	1	2603.2	P81122	Insulin receptor substrate 2 [OS=Mus musculus]	Irs2	0.274038	0.0763854	-0.651557	-0.797913	0.169668	0.5353	0.0492	0.0297	0.575181	0.540054	0.653027	1	0.848351	0.894478	1.072e-05	3.942e-06	3.7
