# Supplementary material for: Divalent Metal Transporter 1 Knock-Down Modulates IL-1β Mediated Pancreatic Beta-Cell Pro-Apoptotic Signaling Pathways through the Autophagic Machinery
Source: Int J Mol Sci. 2021 Jul 27;22(15):8013. doi: 10.3390/ijms22158013 (PMC8348373; doi:10.3390/ijms22158013)
Supplement: Supplementary file 1 [file ijms-22-08013-s001.zip › Table S2.xlsx]

## Sheet: S2_Cover
Table S2. The list of signaling pathways of significantly regulated proteins in both CON/ CON-IL and SC/SC-IL.
Divalent Metal Transporter 1 knock-down modulates IL-1β mediated pancreatic beta-cell pro-apoptotic signaling pathways through the autophagic machinery
Taewook Kang1,2, Honggang Huang1, Thomas Mandrup-Poulsen3, Martin R. Larsen1,*
1 Protein research group, Department of Biochemistry and Molecular Biology, University of Southern Denmark, 5230 Odense M, Denmark.
2 The Danish Diabetes Academy, Odense, Denmark
3 Immuno-endocrinology Laboratory, Department of Biomedical Sciences, University of Copenhagen, 2200 Copenhagen N, Denmark.
*Corresponding author: Prof. Dr. Martin R. Larsen:
Department of Biochemistry and Molecular Biology, the University of Southern Denmark, Denmark. Tel.: 45-60-111872; E-mail: mrl@bmb.sdu.dk

## Sheet: S2
Enrichment analysis report
Enrichment by Pathway Maps					All controls_paired_Prot_Min_S/S+				All controls_paired_Prot_Max_C/C+				All controls_paired_Phospho_Min_S/S+				All controls_paired_Phospho_Max_C/C+
#	Maps	Total	min(pValue)	Min FDR	p-value	FDR	In Data	Network Objects from Active Data	p-value	FDR	In Data	Network Objects from Active Data	p-value	FDR	In Data	Network Objects from Active Data	p-value	FDR	In Data	Network Objects from Active Data
1	Immune response_IL-1 signaling pathway	82	6.62419e-13	6.9819e-10	7.20967e-12	3.97974e-09	15	JNK(MAPK8-10), NF-kB p50/p65, NF-kB2 (p100), ICAM1, RelA (p65 NF-kB subunit), IL-1 beta, p38alpha (MAPK14), NF-kB2 (p52), I-kB, NF-kB, iNOS, IRAK1, NF-kB1 (p105), IP10, NF-kB1 (p50)	6.62419e-13	6.9819e-10	16	NF-kB p50/p65, NF-kB2 (p100), ICAM1, CD44, RelA (p65 NF-kB subunit), IL-1 beta, Sequestosome 1(p62), NF-kB2 (p52), I-kB, NF-kB, iNOS, IRAK1, NF-kB1 (p105), IP10, PI3K reg class IA (p85), NF-kB1 (p50)	0.000330236	0.0147888	7	ZFP36(Tristetraprolin), NF-kB2 (p100), RelA (p65 NF-kB subunit), KHSRP, NF-kB2 (p52), NF-kB, iNOS	0.000341031	0.00473127	7	ZFP36(Tristetraprolin), NF-kB2 (p100), RelA (p65 NF-kB subunit), KHSRP, NF-kB2 (p52), NF-kB, iNOS
2	Signal transduction_NF-kB activation pathways	51	2.06906e-12	1.40086e-09	2.06906e-12	2.28424e-09	13	NF-kB p50/p65, NF-kB2 (p100), MyD88, RelA (p65 NF-kB subunit), IL-1 beta, NF-kB2 (p52), I-kB, NF-kB, IRAK1, RelB (NF-kB subunit), TAB2, NF-kB1 (p105), NF-kB1 (p50)	2.65818e-12	1.40086e-09	13	NF-kB p50/p65, NF-kB2 (p100), MyD88, RelA (p65 NF-kB subunit), IL-1 beta, NF-kB2 (p52), I-kB, NF-kB, IRAK1, TRAF2, RelB (NF-kB subunit), NF-kB1 (p105), NF-kB1 (p50)	0.00880734	0.0895762	4	NF-kB2 (p100), RelA (p65 NF-kB subunit), NF-kB2 (p52), NF-kB	0.00131264	0.0100605	5	NF-kB2 (p100), RelA (p65 NF-kB subunit), NF-kB2 (p52), NF-kB, TRAF3
3	Gamma-secretase proteolytic targets	76	1.26761e-11	1.30564e-08	0.00192172	0.0135999	6	NOTCH1 (NICD), NOTCH1 (NEXT), NGFR (ICD), NOTCH1 receptor, NGFR(TNFRSF16), NGFR (CTF)	0.000359441	0.00505134	7	CD44, CD44 soluble, CD44 (ICD), NGFR (ICD), NGFR(TNFRSF16), CD44 (EXT), NGFR (CTF)	1.26761e-11	1.30564e-08	14	APP-C59 (AICD), DLL1 (IC), Amyloid beta 40, alphaAPPs, APP-C99, NGFR (ICD), DLL1 (TMIC), APP-C83 (CTF), DLL1, NGFR(TNFRSF16), Amyloid beta 42, APP, NGFR (CTF), ADAM17	0.00137005	0.0104276	6	NOTCH1 (NICD), NOTCH1 (NEXT), NGFR (ICD), NOTCH1 receptor, NGFR(TNFRSF16), NGFR (CTF)
4	Apoptosis and survival_NGF activation of NF-kB	40	5.41324e-11	1.90185e-08	3.16804e-07	1.66549e-05	8	MyD88, RIPK2, I-kB, NF-kB, iNOS, IRAK1, NGFR(TNFRSF16), TrkA	5.41324e-11	1.90185e-08	11	MyD88, RIPK2, Sequestosome 1(p62), I-kB, NF-kB, iNOS, IRAK1, Neuromodulin, NGFR(TNFRSF16), PI3K reg class IA, TrkA	0.000413826	0.0163939	5	RIPK2, NF-kB, iNOS, Neuromodulin, NGFR(TNFRSF16)	3.87936e-05	0.00111889	6	RIPK2, NF-kB, iNOS, Shc, Neuromodulin, NGFR(TNFRSF16)
5	Immune response_HSP60 and HSP70/ TLR signaling pathway	54	8.68034e-11	1.91662e-08	8.68034e-11	1.91662e-08	12	IRAK1/2, JNK(MAPK8-10), p38 MAPK, ICAM1, MyD88, MHC class I, IL-1 beta, I-kB, NF-kB, iNOS, TAB2, NF-kB1 (p105)	3.50744e-07	2.46456e-05	9	IRAK1/2, ICAM1, MyD88, MHC class I, IL-1 beta, I-kB, NF-kB, iNOS, NF-kB1 (p105)	0.0550984	0.202208	3	NF-kB, iNOS, c-Jun	0.0558106	0.122148	3	NF-kB, iNOS, c-Jun
6	PDE4 regulation of cyto/chemokine expression in inflammatory skin diseases	50	6.09017e-10	1.12059e-07	6.09017e-10	1.12059e-07	11	p38 MAPK, NF-kB p50/p50, NF-kB p50/p65, RelA (p65 NF-kB subunit), IL-1 beta, Adenylate cyclase, iNOS, CBP, MxA, IP10, NF-kB1 (p50)	1.22108e-08	1.60878e-06	10	NF-kB p50/p50, NF-kB p50/p65, RelA (p65 NF-kB subunit), IL-1 beta, Adenylate cyclase, iNOS, CBP, MxA, IP10, NF-kB1 (p50)	1.33391e-05	0.00228988	7	RelA (p65 NF-kB subunit), Adenylate cyclase, iNOS, CBP, MxA, PDE4, 14-3-3	0.000140575	0.00275125	6	RelA (p65 NF-kB subunit), Adenylate cyclase, iNOS, CBP, MxA, PDE4
7	Immune response_Role of PKR in stress-induced antiviral cell response	57	2.7085e-09	4.27169e-07	2.7085e-09	4.27169e-07	11	JNK(MAPK8-10), NF-kB p50/p65, NFKBIB, MyD88, RelA (p65 NF-kB subunit), IL-1 beta, p38alpha (MAPK14), Caspase-8, I-kB, NF-kB, TAB2	6.12602e-06	0.000215228	8	NF-kB p50/p65, NFKBIB, MyD88, RelA (p65 NF-kB subunit), IL-1 beta, I-kB, NF-kB, TRAF2	0.012932	0.103892	4	PACT, RelA (p65 NF-kB subunit), NF-kB, c-Jun	0.0131648	0.0450632	4	RelA (p65 NF-kB subunit), NF-kB, c-Jun, TRAF3
8	Signal transduction_Angiotensin II/AGTR1 signaling via Notch, Beta-catenin and NF-kB pathways	76	5.64035e-09	7.78368e-07	5.64035e-09	7.78368e-07	12	NOTCH1 (NICD), p38 MAPK, NF-kB p50/p65, NF-kB2 (p100), RelA (p65 NF-kB subunit), NCOA1 (SRC1), NOTCH1 (NEXT), NF-kB2 (p52), I-kB, NF-kB, NOTCH1 receptor, CBP	0.000359441	0.00505134	7	NF-kB p50/p65, NF-kB2 (p100), RelA (p65 NF-kB subunit), NF-kB2 (p52), I-kB, NF-kB, CBP	2.74034e-05	0.00313617	8	NF-kB2 (p100), RelA (p65 NF-kB subunit), NCOA1 (SRC1), NF-kB2 (p52), NF-kB, Connexin 43, CBP, ADAM17	2.84673e-05	0.000917652	8	NOTCH1 (NICD), NF-kB2 (p100), RelA (p65 NF-kB subunit), NOTCH1 (NEXT), NF-kB2 (p52), NF-kB, NOTCH1 receptor, CBP
9	Development_NOTCH1-mediated pathway for NF-KB activity modulation	26	1.25968e-07	9.34886e-05	0.000939483	0.00823166	4	NOTCH1 (NICD), NOTCH1 (NEXT), NF-kB, NOTCH1 receptor	0.0754275	0.194698	2	SAP30, NF-kB	0.00797755	0.0863636	3	NF-kB, DLL1, ADAM17	1.25968e-07	9.34886e-05	7	NOTCH1 (NICD), HDAC1, NOTCH1 (NEXT), NF-kB, NOTCH1 receptor, Histone H3, N-CoR
10	TNF-alpha and IL-1 beta induce hyperglycemia in obesity and type 2 diabetes in adipocytes	35	2.02799e-06	8.90625e-05	2.55582e-05	0.000470272	6	p38 MAPK, RelA (p65 NF-kB subunit), IL-1 beta, Insulin processed, NF-kB, IRAK1	2.02799e-06	8.90625e-05	7	RelA (p65 NF-kB subunit), IL-1 beta, Sequestosome 1(p62), NF-kB, IRAK1, TRAF2, Sortilin	0.0180866	0.122783	3	RelA (p65 NF-kB subunit), NF-kB, APP	0.10836	0.192172	2	RelA (p65 NF-kB subunit), NF-kB
