# Supplementary material for: Divalent Metal Transporter 1 Knock-Down Modulates IL-1β Mediated Pancreatic Beta-Cell Pro-Apoptotic Signaling Pathways through the Autophagic Machinery
Source: Int J Mol Sci. 2021 Jul 27;22(15):8013. doi: 10.3390/ijms22158013 (PMC8348373; doi:10.3390/ijms22158013)
Supplement: Supplementary file 1 [file ijms-22-08013-s001.zip › Table S3.xlsx]

## Sheet: S3_Cover
Table S3. The list of significantly regulated proteins/phosphopeptides in DMT1-KD versus SC.
Divalent Metal Transporter 1 knock-down modulates IL-1β mediated pancreatic beta-cell pro-apoptotic signaling pathways through the autophagic machinery
Taewook Kang1,2, Honggang Huang1, Thomas Mandrup-Poulsen3, Martin R. Larsen1,*
1 Protein research group, Department of Biochemistry and Molecular Biology, University of Southern Denmark, 5230 Odense M, Denmark.
2 The Danish Diabetes Academy, Odense, Denmark
3 Immuno-endocrinology Laboratory, Department of Biomedical Sciences, University of Copenhagen, 2200 Copenhagen N, Denmark.
*Corresponding author: Prof. Dr. Martin R. Larsen:
Department of Biochemistry and Molecular Biology, the University of Southern Denmark, Denmark. Tel.: 45-60-111872; E-mail: mrl@bmb.sdu.dk

## Sheet: S3-Proteome
Master Protein Accessions	Description	Gene symbols	Gene	Log2 ratio: DMT1 KD/ Scrambled	Log2 ratio: (+IL-1b) DMT1 KD/ Scrambled	Log2 ratio: Scrambled/Scrambled+ IL-1b	Log2 ratio: Control/ Control+ IL-1b	Adjusted p-value: DMT1 KD/ Scrambled	Adjusted p-value: (+IL-1b) DMT1 KD/ Scrambled	Adjusted p-value:: Scrambled/Scrambled+ IL-1b	Adjusted p-value:: Control/ Control+ IL-1b	Control	Scrambled	DMT1 KD	Control +IL-1b	Scrambled +IL-1b	DMT1 KD +IL-1b	Coverage [%]	# Peptides	# PSMs	# Unique Peptides	Score Sequest HT: Sequest HT
Q3MKQ1	Protein BEX2 [OS=Rattus norvegicus]	Bex2	Bex2	1.01548	0.229851	0.046608	0.319934	0.003	0.0961	0.6788	0.0378	0.545947	0.494665	1	0.437362	0.478939	0.561659	53	7	19	3	59.48
Q5BJR4	Protein prune homolog 2 [OS=Rattus norvegicus]	Prune2	Prune2	0.609003	0.257884	-0.233453	-0.447602	0.0265	0.0717	0.0985	0.0383	0.568072	0.65565	1	0.774721	0.770812	0.921678	15	4	7	4	23.2
Q9JLV1	BAG family molecular chaperone regulator 3 [OS=Mus musculus]	Bag3	Bag3	0.54562	0.284912	-0.148424	-0.18882	0.0432	0.0545	0.2246	0.2546	0.719388	0.685097	1	0.819981	0.759333	0.925123	29	14	67	14	214.04
Q9QX67	Death-associated protein 1 [OS=Rattus norvegicus]	Dap	Dap	-0.565558	-0.554379	-0.0802693	-0.407498	0.0422	0.0127	0.4636	0.0488	0.75393	0.869708	0.587656	1	0.919468	0.626112	49	6	105	6	266.92
P02803	Metallothionein-1 [OS=Rattus norvegicus]	Mt1a; Mt1; LOC100125598	Mt1a	1.07553	-0.518381	-0.724488	-0.725503	0.0026	0.0159	0.0079	0.0105	0.563174	0.474497	1	0.931195	0.784018	0.547366	13	1	2	1	6.01
Q8R460	Interleukin-36 gamma [OS=Mus musculus]	Il1f9	Il1f9	0.931173	-0.58055	-0.36221	-0.121431	0.005	0.0108	0.0364	0.44	0.627597	0.524432	1	0.682708	0.674101	0.450778	7	1	2	1	4.95
Q63264	Interleukin-1 beta [OS=Rattus norvegicus]	Il1b	Il1b	0.912348	-0.381245	-1.68137	-1.57809	0.0057	0.0368	0.0012	0.0017	0.334926	0.283977	0.534475	1	0.910807	0.699295	3	1	1	1	1.87
P63040	Complexin-1 [OS=Mus musculus]	Cplx1	Cplx1	0.730923	-0.334452	-0.322463	-0.240779	0.0131	0.0523	0.0462	0.1644	0.71907	0.602518	1	0.849675	0.753427	0.597532	37	6	65	1	177.06
Q78T81	Protein FAM102A [OS=Mus musculus]	Fam102a	Fam102a	0.730789	-0.457526	-0.50536	-0.245846	0.0132	0.0234	0.0168	0.1578	0.620538	0.602574	1	0.735827	0.855341	0.622888	14	4	37	4	133.54
O09015	Max-interacting protein 1 [OS=Rattus norvegicus]	Mxi1	Mxi1	0.716818	0.507468	0.562141	0.769341	0.0138	0.0043	0.0044	0.001	0.708561	0.608438	1	0.415702	0.412093	0.585812	6	1	2	1	8.42
Q80YR7	Claspin [OS=Mus musculus]	Clspn	Clspn	0.582097	0.397891	0.333768	0.219432	0.0317	0.0154	0.0236	0.1095	0.687936	0.667992	1	0.590871	0.530026	0.698352	6	7	28	7	82.45
A2APV2-1	Formin-like protein 2 [OS=Mus musculus]	Fmnl2	Fmnl2	0.5796	-0.37349	-0.332205	-0.0534387	0.0324	0.0396	0.044	0.7699	0.811775	0.669149	1	0.842408	0.842416	0.650272	4	3	5	1	18.37
P28660	Nck-associated protein 1 [OS=Mus musculus]	Nckap1	Nckap1	0.528685	-0.360841	-0.553963	-0.3477	0.049	0.0434	0.0141	0.0714	0.700064	0.681146	0.982631	0.890853	1	0.778711	32	30	66	30	206.62
P13053	Vitamin D3 receptor [OS=Rattus norvegicus]	Vdr	Vdr	-0.641881	0.29364	0.954414	0.804231	0.0319	0.0497	0.0006	0.0006	0.86825	1	0.640877	0.497218	0.516051	0.632539	4	1	1	1	4.3
Q3B7T8	centrosomal protein of 44 kDa [OS=Rattus norvegicus]	Cep44	Cep44	-0.647959	0.330947	0.317763	0.2284	0.0308	0.0319	0.0287	0.1	0.913581	0.990903	0.632377	0.779815	0.795014	1	7	1	2	1	3.74
Q62857	DNA damage-inducible transcript 3 protein [OS=Rattus norvegicus]	Ddit3	Ddit3	-0.76202	-0.380455	-0.588587	-0.795875	0.0219	0.0374	0.0119	0.0077	0.575994	0.617372	0.364046	1	0.928388	0.713183	11	2	3	2	7.7
Q4V8F3	Rhomboid-related protein 4 [OS=Rattus norvegicus]	Rhbdd1	Rhbdd1	0.81817	-0.205683	-0.128958	-0.247653	0.0084	0.1377	0.2759	0.1557	0.594022	0.567161	1	0.705267	0.620193	0.537786	5	1	1	1	2.26
Q9D9K3	Cell death regulator Aven [OS=Mus musculus]	Aven	Aven	0.754437	0.0520137	-0.15323	0.0958383	0.0116	0.7007	0.213	0.4	0.724097	0.592778	1	0.677558	0.659202	0.683402	17	4	6	4	23.65
O54786-2	Isoform ICAD-S of DNA fragmentation factor subunit alpha [OS=Mus musculus]	Dffa	Dffa	0.742915	-0.316811	-0.27802	-0.105365	0.0124	0.0594	0.0665	0.507	0.662365	0.597531	1	0.71255	0.724524	0.581679	15	3	7	1	23.3
O54786	DNA fragmentation factor subunit alpha [OS=Mus musculus]	Dffa	Dffa	0.625595	-0.164925	-0.192061	-0.00645422	0.0229	0.1954	0.1429	0.9545	0.779977	0.648153	1	0.783474	0.740446	0.660459	10	3	8	1	24.97
Q9JJG9	Nitric oxide-associated protein 1 [OS=Mus musculus]	Noa1	Noa1	0.619849	-0.115694	-0.0667137	0.0536602	0.0241	0.3156	0.5332	0.601	0.738903	0.650739	1	0.711924	0.681537	0.629017	3	2	2	2	5.94
Q9JJ48	Zinc finger CCCH domain-containing protein 8 [OS=Mus musculus]	Zc3h8	Zc3h8	0.606339	0.00985031	-0.25208	0.0280002	0.027	0.9943	0.0828	0.7461	0.69382	0.656861	1	0.680484	0.782272	0.787631	7	2	4	2	13.21
P70236	Dual specificity mitogen-activated protein kinase kinase 6 [OS=Mus musculus]	Map2k6	Map2k6	0.583599	0.615309	-0.261064	0.142542	0.0312	0.0015	0.0772	0.2513	0.63601	0.544735	0.816331	0.576176	0.65279	1	7	3	5	1	16.76
O70239	Axin-1 [OS=Rattus norvegicus]	Axin1	Axin1	0.532601	-0.212601	0.165873	0.0433833	0.0481	0.1309	0.1567	0.6622	0.759147	0.691307	1	0.736658	0.616224	0.531789	2	2	3	1	4.7
Q9D8Z2	TP53-regulated inhibitor of apoptosis 1 [OS=Mus musculus]	Triap1	Triap1	-0.557883	0.0226519	0.080216	-0.0767574	0.044	0.9114	0.4641	0.648	0.891169	1	0.679298	0.939867	0.945916	0.960885	18	1	2	1	6.75
P14841	Cystatin-C [OS=Rattus norvegicus]	Cst3	Cst3	-0.642911	-0.116118	0.0311263	0.303693	0.0316	0.3135	0.7852	0.0439	1	0.915257	0.586149	0.810176	0.895722	0.826453	31	4	23	4	77.66
P46096	Synaptotagmin-1 [OS=Mus musculus]	Syt1	Syt1	2.5804	0.436249	-0.836556	-0.901626	0.0001	0.0105	0.0052	0.0058	0.167935	0.167194	1	0.313731	0.298573	0.403993	19	8	20	4	56.61
P05942	Protein S100-A4 [OS=Rattus norvegicus]	S100a4	S100a4	1.70983	0.614999	-0.294118	-0.271803	0.0003	0.0017	0.0575	0.1281	0.315773	0.305697	1	0.381237	0.374825	0.574066	25	3	4	3	11.32
Q8CHP5-1	Partner of Y14 and mago [OS=Mus musculus]	Wibg; Pym1	Pym1	1.59501	0.240699	-0.0138721	0.213802	0.0004	0.0861	0.8756	0.1163	0.411391	0.331019	1	0.354726	0.334217	0.394899	26	6	21	6	66.65
Q3MKQ2	Protein BEX1 [OS=Rattus norvegicus]	Bex1	Bex1	1.50783	0.283917	0.129008	0.534901	0.0006	0.0549	0.2557	0.0055	0.41338	0.351641	1	0.285318	0.321561	0.3915	48	7	19	3	50.37
P18608	Non-histone chromosomal protein HMG-14 [OS=Mus musculus]	Hmgn1; LOC100044391; LOC102641809	Hmgn1	1.47977	-0.125872	-0.227654	-0.127537	0.0007	0.285	0.1039	0.4207	0.399008	0.358547	1	0.435888	0.419833	0.384755	42	3	13	3	34.76
Q8K003	Translation machinery-associated protein 7 [OS=Mus musculus]	Tma7-ps; Tma7	Tma7	1.39501	-0.0113495	-0.144604	0.193219	0.0008	0.844	0.2354	0.1437	0.450935	0.380242	1	0.394411	0.42033	0.417037	25	2	4	2	10.93
Q8K585	High mobility group protein HMG-I/HMG-Y [OS=Rattus norvegicus]	Hmga1	Hmga1	1.36503	0.0311035	-0.0722324	0.133973	0.001	0.8495	0.5029	0.272	0.426469	0.388226	1	0.388649	0.408159	0.417054	40	5	26	5	87.7
Q62764	Y-box-binding protein 3 [OS=Rattus norvegicus]	Csda; Ybx3	Ybx3	1.35809	-0.0785071	0.304811	0.312781	0.0011	0.452	0.0331	0.0403	0.372821	0.3901	1	0.300154	0.315804	0.299079	57	15	171	2	622.45
P52925	High mobility group protein B2 [OS=Rattus norvegicus]	Hmgb2; RGD1564519; Hmgb2l1	Hmgb2	1.33256	-0.198344	-0.0456017	0.297721	0.0012	0.1465	0.6643	0.0468	0.453973	0.397063	1	0.369323	0.409814	0.357174	59	19	170	13	486.81
Q3UIW5-1	RING finger protein 10 [OS=Mus musculus]	Rnf10	Rnf10	1.27684	0.444396	0.0234834	-0.185699	0.0014	0.0094	0.8415	0.2607	0.416352	0.412699	1	0.473546	0.406036	0.552511	2	1	2	1	6.9
P84102	Small EDRK-rich factor 2 [OS=Mus musculus]	Serf2	Serf2	1.24897	0.262838	0.144142	0.161434	0.0015	0.0687	0.2088	0.2059	0.499256	0.420749	1	0.446403	0.380743	0.45683	19	1	2	1	6.1
Q8CI85	Carbonic anhydrase 12 [OS=Mus musculus]	Car12	Car12	1.24823	0.00677677	-0.0347156	0.268255	0.0017	0.9719	0.7338	0.0629	0.517332	0.420963	1	0.429553	0.431216	0.433246	3	1	2	1	2.21
Q3U898	COP9 signalosome complex subunit 9 [OS=Mus musculus]	Myeov2; Cops9	Cops9	1.24375	0.240818	0.0978727	-0.0238238	0.0018	0.0859	0.3775	0.9454	0.469415	0.422272	1	0.477231	0.394575	0.466255	35	1	7	1	22.27
B4F777	High mobility group nucleosome-binding domain-containing protein 5 [OS=Rattus norvegicus]	Hmgn5; Hmgn5b; Nsbp1_predicted	Hmgn5	1.22462	-0.0666809	-0.227275	-0.339136	0.0019	0.5059	0.1041	0.077	0.486926	0.427909	1	0.615961	0.50092	0.478294	83	44	291	44	938.38
Q8K207	uncharacterized protein C1orf21 homolog [OS=Mus musculus]	1700025G04Rik	1700025G04Rik	1.19387	-0.0570592	-0.0284297	0.0961304	0.0021	0.5519	0.7748	0.3985	0.5358	0.437128	1	0.501262	0.445827	0.428539	36	4	9	4	32.12
Q64578	Sarcoplasmic/endoplasmic reticulum calcium ATPase 1 [OS=Rattus norvegicus]	Atp2a1	Atp2a1	1.19088	-0.242987	0.0429031	0.34551	0.0022	0.1011	0.7018	0.0283	0.503483	0.438035	1	0.396256	0.425201	0.359292	19	20	147	1	553.11
Q8BG79-1	CWF19-like protein 2 [OS=Mus musculus]	Cwf19l2	Cwf19l2	1.14348	-0.216754	-0.166467	0.0431635	0.0023	0.1252	0.1839	0.6633	0.510059	0.452667	1	0.495025	0.508031	0.437161	5	4	6	4	15.39
Q6P719	Membrane magnesium transporter 2 [OS=Rattus norvegicus]	Mmgt2	Mmgt2	1.09671	0.724143	0.00228465	0.0900604	0.0025	0.0008	0.9999	0.4233	0.482477	0.467583	1	0.453279	0.466843	0.771187	10	1	2	1	4.75
P18437	Non-histone chromosomal protein HMG-17 [OS=Rattus norvegicus]	Hmgn2	Hmgn2	1.0448	0.251652	0.0303353	0.197218	0.0028	0.0766	0.7912	0.1375	0.601913	0.484714	1	0.525007	0.474628	0.565078	29	3	32	1	96.94
Q5BJQ7	Transcriptional adapter 1 [OS=Rattus norvegicus]	Tada1	Tada1	1.01841	-0.114076	-0.115106	0.12007	0.0029	0.3203	0.3185	0.3141	0.589709	0.493661	1	0.542616	0.534662	0.494013	11	3	3	3	12.14
P04550	Parathymosin [OS=Rattus norvegicus]	Ptms	Ptms	1.01246	-0.0634634	-0.146225	-0.44423	0.0032	0.5225	0.2297	0.039	0.50007	0.495702	1	0.680389	0.548578	0.52497	30	3	13	3	28.56
P43136	Nuclear receptor subfamily 2 group F member 6 [OS=Mus musculus]	Nr2f6	Nr2f6	1.00546	-0.280549	-0.14667	0.0148577	0.0033	0.0749	0.2287	0.8251	0.562445	0.498112	1	0.556683	0.551416	0.453968	4	2	3	1	5.21
Q99KJ5	transcription factor 19-like protein [OS=Mus musculus]	Tcf19	Tcf19	1.00467	0.219534	-0.0211073	-0.0393342	0.0034	0.1072	0.8274	0.8527	0.606366	0.498384	1	0.623126	0.505729	0.588849	5	1	1	1	3.19
Q27W01	RNA-binding protein 8A [OS=Rattus norvegicus]	Rbm8a	Rbm8a	1.0027	0.0918532	0.00519326	0.0502887	0.0036	0.464	0.9766	0.6194	0.593272	0.499064	1	0.572948	0.497271	0.529961	63	9	185	2	740.71
Q60766	Immunity-related GTPase family M protein 1 [OS=Mus musculus]	Irgm1	Irgm1	1.0001	-0.125255	-0.426758	-0.661774	0.0037	0.2872	0.024	0.0123	0.433785	0.499964	1	0.686259	0.672056	0.61617	2	1	1	1	3.36
P02535-1	Keratin, type I cytoskeletal 10 [OS=Mus musculus]	Krt10	Krt10	0.989909	-0.428581	-0.55052	-0.352769	0.0039	0.028	0.0143	0.0698	0.589432	0.503509	1	0.75271	0.737447	0.547917	12	7	26	1	79.16
P63159	High mobility group protein B1 [OS=Rattus norvegicus]	Hmgb1; Hmg1l1	Hmgb1	0.988292	-0.358201	-0.106925	0.0113364	0.004	0.0444	0.3508	0.8458	0.533521	0.504074	1	0.529346	0.542853	0.4235	56	22	342	17	1058.02
Q9ET47	espin [OS=Mus musculus]	Espn	Espn	0.97569	0.136343	0.193528	0.0847678	0.0041	0.2801	0.112	0.4422	0.516706	0.508497	1	0.48722	0.444662	0.488735	4	4	5	4	13.91
Q924X6	Low-density lipoprotein receptor-related protein 8 [OS=Mus musculus]	Lrp8	Lrp8	0.967874	-0.379523	-0.0864864	0.16785	0.0043	0.0379	0.4338	0.193	0.573837	0.511259	1	0.510812	0.542845	0.41728	2	2	4	1	10.1
Q9ERH4-1	Nucleolar and spindle-associated protein 1 [OS=Mus musculus]	Nusap1	Nusap1	0.964451	-0.157117	0.0662777	0.256443	0.0044	0.2102	0.5447	0.0713	0.595437	0.512473	1	0.49847	0.489463	0.438958	7	3	5	3	16.78
O35723	DnaJ homolog subfamily B member 3 [OS=Mus musculus]	Dnajb3	Dnajb3	0.961088	0.10896	-0.156255	-0.00684297	0.0046	0.3828	0.2065	0.9572	0.6002	0.513669	1	0.603054	0.572428	0.617336	8	4	9	2	28.09
Q56A18-4	Isoform 4 of SWI/SNF-related matrix-associated actin-dependent regulator of chromatin subfamily E member 1 [OS=Rattus norvegicus]	Smarce1	Smarce1	0.950232	-0.0632018	0.00228288	0.240157	0.0047	0.5236	1	0.0865	0.643025	0.517549	1	0.544419	0.516731	0.494583	62	24	92	3	319.98
P41224	thyrotroph embryonic factor [OS=Rattus norvegicus]	Tef	Tef	0.934289	0.304798	-0.166952	-0.0486063	0.0048	0.044	0.1832	0.797	0.573101	0.5233	1	0.592738	0.587501	0.725707	13	3	4	3	10.19
Q05474	Ubiquitin-like protein FUBI [OS=Rattus norvegicus]	Fau	Fau	0.926338	-0.0361098	-0.342915	-0.173128	0.0051	0.6734	0.0411	0.2857	0.640262	0.526192	1	0.721896	0.667378	0.650882	26	1	3	1	13.97
Q9Z0F1	neuroendocrine secretory protein 55 [OS=Mus musculus]	Gnas	Gnas	0.923616	-0.0143377	0.430467	0.345679	0.0052	0.8232	0.011	0.0281	0.554269	0.527186	1	0.436175	0.391183	0.387315	14	4	7	4	19.86
Q80TP3	E3 ubiquitin-protein ligase UBR5 [OS=Mus musculus]	Ubr5	Ubr5	0.918368	-0.103147	0.0360224	-0.125784	0.0054	0.3537	0.7477	0.427	0.560808	0.529107	1	0.611898	0.51606	0.480451	21	42	75	1	238.58
Q9D8X2	Coiled-coil domain-containing protein 124 [OS=Mus musculus]	Ccdc124	Ccdc124	0.913264	0.196081	-0.101953	0.161689	0.0055	0.1418	0.369	0.2047	0.629146	0.530982	1	0.562443	0.569864	0.652825	58	14	45	14	158.86
Q80TR1-1	Adhesion G protein-coupled receptor L1 [OS=Mus musculus]	Lphn1; Adgrl1	Lphn1	0.908337	-0.276198	-0.151476	0.113927	0.0058	0.0789	0.2181	0.3359	0.604273	0.532799	1	0.55839	0.591782	0.488673	2	2	2	2	5.75
Q8K582	tRNA-dihydrouridine(16/17) synthase [NAD(P)(+)]-like [OS=Rattus norvegicus]	Pp3111; Dus1l	Pp3111	0.898074	-0.0589143	0.0187003	0.206904	0.0059	0.5429	0.8724	0.1239	0.655743	0.536603	1	0.568132	0.529692	0.508497	7	2	2	2	8.35
Q6R518	GPN-loop GTPase 3 [OS=Rattus norvegicus]	Gpn3	Gpn3	0.892606	-0.0547142	0.059622	0.148391	0.0061	0.5654	0.5839	0.2366	0.575692	0.53864	1	0.519421	0.516834	0.4976	12	2	4	2	16.53
Q9JL61	DNA-binding protein RFX5 [OS=Mus musculus]	Rfx5	Rfx5	0.888635	-0.173874	-0.144459	0.138271	0.0062	0.1793	0.2357	0.2619	0.669405	0.540125	1	0.608227	0.597009	0.529224	7	4	5	4	18.9
Q8R1L4	ER lumen protein-retaining receptor 3 [OS=Mus musculus]	Kdelr3	Kdelr3	0.885132	0.515595	-0.544668	-0.130899	0.0063	0.0041	0.0145	0.4087	0.571855	0.479544	0.885687	0.626168	0.699504	1	4	1	1	1	3.18
Q3UV17	Keratin, type II cytoskeletal 2 oral [OS=Mus musculus]	Krt76	Krt76	0.883974	-0.326824	-0.442867	-0.354785	0.0065	0.0552	0.0221	0.0688	0.61508	0.541873	1	0.786561	0.736569	0.587259	5	4	12	1	36.45
Q9QZS2	E3 ubiquitin-protein ligase RNF4 [OS=Mus musculus]	Rnf4	Rnf4	0.874251	0.0145316	-0.117757	0.0399956	0.0066	0.9695	0.3084	0.6808	0.666606	0.545537	1	0.64838	0.591933	0.597925	4	1	1	1	2.25
O88574	Histone deacetylase complex subunit SAP30 [OS=Mus musculus]	Sap30	Sap30	0.873014	0.0797619	-0.0263184	0.418366	0.0068	0.5287	0.7914	0.0142	0.642029	0.546005	1	0.480412	0.556057	0.587665	15	2	7	2	35.05
Q61089	Frizzled-6 [OS=Mus musculus]	Fzd6	Fzd6	0.872391	-0.407645	-0.1481	0.130468	0.0069	0.0309	0.2252	0.2804	0.627241	0.546241	1	0.573006	0.605294	0.456303	1	1	1	1	2.02
Q712U5-1	cAMP-regulated phosphoprotein 19 [OS=Rattus norvegicus]	Arpp19; LOC100360828	Arpp19	0.857189	-0.106642	0.0470159	0.23541	0.007	0.3423	0.6757	0.0919	0.678942	0.552027	1	0.576723	0.534327	0.496255	40	4	38	3	122.07
Q4KLL9	Kinesin-like protein KIF18B [OS=Rattus norvegicus]	Kif18b	Kif18b	0.853323	0.103674	0.0987975	0.37405	0.0072	0.4079	0.3727	0.0212	0.647075	0.553508	1	0.499292	0.516872	0.555383	10	4	17	4	38.07
Q925G0	RNA-binding protein 3 [OS=Rattus norvegicus]	Rbm3	Rbm3	0.851556	0.288979	-0.286597	-0.407	0.0073	0.052	0.0601	0.049	0.527199	0.554187	1	0.699027	0.675975	0.825889	72	12	77	1	248.76
Q8VIN1	Phosphatidylethanolamine-binding protein 2 [OS=Mus musculus]	Pbp2	Pbp2	0.84681	0.0995518	-0.0101855	0.20682	0.0074	0.4274	0.9025	0.124	0.693327	0.556013	1	0.60073	0.559952	0.599955	20	3	58	2	152.45
S4R1M9	Oxysterol-binding protein-related protein 10 [OS=Mus musculus]	Osbpl10	Osbpl10	0.836593	-0.193466	-0.291997	0.0116692	0.0076	0.1541	0.0581	0.8432	0.665679	0.559964	1	0.660316	0.685583	0.599544	7	4	16	3	34.67
Q8K2C8	glycerol-3-phosphate acyltransferase 4 [OS=Mus musculus]	Agpat6; Gpat4	Agpat6	0.829891	0.0183887	-0.197685	-0.075932	0.0077	0.9441	0.1349	0.6534	0.66676	0.562572	1	0.702793	0.645189	0.653465	9	4	4	4	8.03
P97613	Securin [OS=Rattus norvegicus]	Pttg1	Pttg1	0.829552	0.229599	-0.0686594	-0.0652276	0.0079	0.0968	0.5225	0.7086	0.593385	0.562704	1	0.620829	0.590131	0.691934	12	3	5	3	11.2
Q6J4I0	Protein phosphatase 1 regulatory subunit 1B [OS=Rattus norvegicus]	Ppp1r1b	Ppp1r1b	0.826939	-0.00338924	-0.169652	-0.272436	0.008	0.8982	0.1782	0.1273	0.563998	0.563724	1	0.681223	0.63407	0.632582	52	6	19	6	55.22
Q561K4	Coiled-coil domain-containing protein 32 [OS=Rattus norvegicus]	Ccdc32	Ccdc32	0.825445	0.145779	-0.317711	-0.18104	0.0081	0.2509	0.0477	0.2692	0.699006	0.564308	1	0.792464	0.703327	0.77811	17	2	3	2	10.9
Q9Z173-1	Adhesion G protein-coupled receptor L3 [OS=Rattus norvegicus]	Lphn3; Adgrl3	Lphn3	0.820447	-0.0907378	0.0488167	0.0263826	0.0083	0.4008	0.6621	0.7539	0.615612	0.566267	1	0.604457	0.547426	0.514057	2	2	2	2	7.41
P97369	Neutrophil cytosol factor 4 [OS=Mus musculus]	Ncf4	Ncf4	0.808928	-0.647915	-0.105698	-0.295294	0.0087	0.0074	0.3553	0.1083	0.597836	0.570806	1	0.733625	0.614196	0.391981	4	1	3	1	6.94
Q3U3E2	Protein FAM117B [OS=Mus musculus]	Fam117b	Fam117b	0.807289	0.445948	-0.276526	-0.268955	0.0088	0.0092	0.0673	0.131	0.656085	0.571455	1	0.79054	0.692189	0.942906	19	10	51	10	92.21
Q5M820	MORF4 family-associated protein 1 [OS=Rattus norvegicus]	Mrfap1	Mrfap1	0.805469	0.32869	0.0257142	-0.0884345	0.009	0.0327	0.8232	0.5861	0.608923	0.572176	1	0.647416	0.562068	0.705885	71	5	37	5	138.66
Q5U1X0	Transcription initiation factor TFIID subunit 11 [OS=Rattus norvegicus]	Taf11	Taf11	0.796688	-0.213182	-0.0683567	-0.139632	0.0091	0.1302	0.524	0.3781	0.610476	0.575669	1	0.672515	0.603602	0.520686	28	4	7	4	22.81
Q5U4F3	Protein FAM107B [OS=Rattus norvegicus]	Fam107b	Fam107b	0.796558	0.293701	0.20785	0.0958916	0.0092	0.0495	0.0934	0.3999	0.579907	0.575721	1	0.542615	0.498475	0.611021	60	10	21	10	69.55
Q8R331	zinc finger HIT domain-containing protein 1 [OS=Mus musculus]	Znhit1	Znhit1	0.796506	-0.41913	-0.218172	-0.244079	0.0094	0.0292	0.1123	0.1603	0.556253	0.575742	1	0.658791	0.669737	0.50088	15	1	1	1	3.52
P26645	Myristoylated alanine-rich C-kinase substrate [OS=Mus musculus]	Marcks	Marcks	0.794925	-0.156017	-0.0646349	-0.149129	0.0095	0.2127	0.5451	0.3523	0.649125	0.576373	1	0.719814	0.602783	0.540997	27	8	116	1	315.21
P50411	Protein phosphatase inhibitor 2 [OS=Rattus norvegicus]	Ppp1r2	Ppp1r2	0.792319	-0.167365	-0.0211126	-0.132728	0.0097	0.192	0.8273	0.403	0.63267	0.577415	1	0.693637	0.585927	0.521749	60	12	70	11	242.58
Q91X84	CREB-regulated transcription coactivator 3 [OS=Mus musculus]	Crtc3	Crtc3	0.787884	0.022018	-0.123758	0.20402	0.0098	0.9168	0.2892	0.1286	0.698599	0.579193	1	0.606473	0.631071	0.640776	9	6	10	6	26.33
P63216	Guanine nucleotide-binding protein G(I)/G(S)/G(O) subunit gamma-3 [OS=Mus musculus]	Gng3	Gng3	0.787372	-0.202646	-0.0123204	0.403902	0.0099	0.1415	0.8872	0.0168	0.694104	0.579398	1	0.524612	0.584368	0.507789	23	1	1	1	4.25
Q3U2K0-1	Protein FAM193B [OS=Mus musculus]	Fam193b	Fam193b	0.776078	0.10943	-0.0384508	0.391645	0.0101	0.3811	0.7088	0.019	0.724571	0.583952	1	0.552312	0.599725	0.646984	8	4	5	4	11.03
Q9JM80	Phosphoprotein associated with glycosphingolipid-enriched microdomains 1 [OS=Rattus norvegicus]	Cbp; Pag1	Cbp	0.775914	0.0758334	-0.563685	-0.709588	0.0102	0.5474	0.0135	0.011	0.611495	0.568871	0.974063	1	0.840813	0.886192	24	7	33	7	81.7
Q52KG5	Kinesin-like protein KIF26A [OS=Mus musculus]	Kif26a	Kif26a	0.770811	0.232226	-0.711024	-0.171421	0.0103	0.0935	0.0081	0.2912	0.639107	0.52006	0.887341	0.719741	0.85132	1	1	1	1	1	5.54
Q3UHU5	Microtubule cross-linking factor 1 [OS=Mus musculus]	Mtcl1	Mtcl1	0.767025	-0.056086	0.00358264	0.0417235	0.0105	0.557	0.9901	0.6708	0.667386	0.587628	1	0.648362	0.586171	0.56382	5	7	30	7	83.84
Q5XIB5	Coiled-coil domain-containing protein 86 [OS=Rattus norvegicus]	Ccdc86	Ccdc86	0.76516	0.100391	-0.142962	-0.059614	0.0106	0.4237	0.2394	0.7371	0.639293	0.588388	1	0.666262	0.649681	0.696499	50	19	87	19	297.86
Q62241	U1 small nuclear ribonucleoprotein C [OS=Mus musculus]	Snrpc	Snrpc	0.764651	0.117091	-0.0598512	0.281871	0.0108	0.3487	0.5688	0.0557	0.723444	0.588596	1	0.595049	0.613528	0.665399	29	4	23	4	83.74
Q8K4E0-1	Alstrom syndrome protein 1 homolog [OS=Mus musculus]	Alms1	Alms1	0.764512	0.104305	0.0210698	0.151474	0.0109	0.4048	0.8579	0.229	0.64618	0.588653	1	0.581776	0.580118	0.623614	0	1	1	1	4.38
Q8BGY2	Eukaryotic translation initiation factor 5A-2 [OS=Mus musculus]	Eif5a2	Eif5a2	0.763332	0.0724552	-0.0394828	0.0645139	0.011	0.5677	0.7022	0.54	0.653192	0.589134	1	0.624626	0.60548	0.636665	37	7	306	2	1019.66
P09528	Ferritin heavy chain [OS=Mus musculus]	Fth1	Fth1	0.758861	0.134571	-0.384561	-0.388093	0.0112	0.287	0.0317	0.0554	0.632357	0.590963	1	0.827542	0.77148	0.846905	41	8	35	1	107.51
P06302	Prothymosin alpha [OS=Rattus norvegicus]	Ptma; LOC100359583	Ptma	0.758587	-0.0471833	0.0296033	-0.414921	0.0113	0.6086	0.7957	0.0466	0.540131	0.591075	1	0.720117	0.57907	0.560438	23	6	111	6	397.58
Q6MG07	Proline-rich protein 3 [OS=Rattus norvegicus]	Prr3	Prr3	0.757401	-0.208162	-0.0570547	0.137292	0.0114	0.1352	0.5866	0.2641	0.674218	0.591561	1	0.613015	0.615425	0.532736	19	3	3	3	9.76
Q8BRH3	Rho GTPase-activating protein 19 [OS=Mus musculus]	Arhgap19	Arhgap19	0.754145	-0.0236797	0.250588	0.419854	0.0117	0.7582	0.0559	0.0139	0.70803	0.592898	1	0.529253	0.498363	0.490249	2	1	1	1	4.66
Q8BGN5	NIPA-like protein 3 [OS=Mus musculus]	Nipal3	Nipal3	0.747927	0.0424998	0.221997	-0.19049	0.0119	0.7702	0.0804	0.2509	0.510026	0.595459	1	0.582017	0.510533	0.525797	5	1	1	1	4.06
Q925H1	Zinc finger transcription factor Trps1 [OS=Mus musculus]	Trps1	Trps1	0.747485	-0.171029	-0.0104767	0.460503	0.012	0.184	0.9003	0.0099	0.731848	0.595641	1	0.531858	0.599982	0.53291	6	5	18	5	48.64
Q80X44-1	Zinc finger and BTB domain-containing protein 24 [OS=Mus musculus]	Zbtb24	Zbtb24	0.746473	0.0537527	-0.210487	0.0847569	0.0121	0.6887	0.1192	0.4423	0.715977	0.596059	1	0.675126	0.689687	0.715869	1	1	1	1	2.32
Q9WV78	Plasmalemma vesicle-associated protein [OS=Rattus norvegicus]	Plvap	Plvap	0.744719	-0.292151	-0.153376	-0.22835	0.0123	0.0702	0.2124	0.1836	0.606548	0.596784	1	0.710568	0.663725	0.542053	4	2	4	1	11.14
P58468	protein FAM207A [OS=Mus musculus]	1810008A18Rik; Fam207a	Fam207a	0.74141	-0.134359	0.121367	0.202237	0.0126	0.2636	0.28	0.1306	0.656241	0.598155	1	0.570406	0.549893	0.500994	10	1	1	1	5.14
P0C5Y8	Alsin [OS=Rattus norvegicus]	Als2	Als2	0.737517	-0.0662867	0.0168376	-0.0385508	0.0127	0.5083	0.8859	0.859	0.668869	0.599771	1	0.686983	0.592812	0.56619	2	4	19	4	39.54
Q6AYF1	Target of rapamycin complex 2 subunit MAPKAP1 [OS=Rattus norvegicus]	Mapkap1	Mapkap1	0.732651	0.117839	-0.15165	-0.162605	0.013	0.3452	0.2177	0.3137	0.739349	0.601797	1	0.827558	0.6685	0.725394	4	2	2	2	5.64
Q91WJ7-1	SPATS2-like protein [OS=Mus musculus]	Spats2l	Spats2l	0.729025	-0.317784	-0.220269	0.139472	0.0134	0.0589	0.1098	0.2594	0.754127	0.603312	1	0.684635	0.702828	0.56388	6	3	4	2	12.22
Q9JIL5	Tubby-related protein 4 [OS=Mus musculus]	Tulp4	Tulp4	0.720424	-0.161278	-0.278729	-0.0670364	0.0135	0.2019	0.0657	0.699	0.716394	0.606919	1	0.750467	0.736269	0.658396	2	1	1	1	0
Q8C735-1	Protein lin-9 homolog [OS=Mus musculus]	Lin9	Lin9	0.719896	-0.321529	-0.0139225	0.0465521	0.0137	0.0575	0.8754	0.6411	0.620173	0.607141	1	0.600481	0.613028	0.490558	6	3	4	3	5.06
P63055	calmodulin regulator protein PCP4 [OS=Rattus norvegicus]	Pcp4	Pcp4	0.715911	-0.181365	0.0585752	-0.0551476	0.0139	0.1708	0.5908	0.7612	0.690755	0.608821	1	0.717671	0.584597	0.515538	44	3	4	3	16.47
Q3UQS2	leucine-rich single-pass membrane protein 1 [OS=Mus musculus]	Gm889; Lsmem1	Lsmem1	0.708151	-0.22808	-0.0724168	0.264843	0.0141	0.1126	0.5018	0.0647	0.724588	0.612104	1	0.603067	0.643613	0.549498	5	1	2	1	5.37
Q3T1J8	protein RTF2 homolog [OS=Rattus norvegicus]	Rtfdc1	Rtfdc1	0.707182	-0.0630432	-0.142097	0.234711	0.0143	0.5246	0.2415	0.0927	0.758546	0.612515	1	0.644655	0.675915	0.647015	17	5	10	5	33.58
Q61026	Nuclear receptor coactivator 2 [OS=Mus musculus]	Ncoa2	Ncoa2	0.707179	0.0114304	0.0410562	0.339902	0.0145	0.9912	0.7143	0.0299	0.751085	0.612516	1	0.593428	0.595331	0.600067	12	15	26	1	99.68
Q9D3R3-1	Centrosomal protein of 72 kDa [OS=Mus musculus]	Cep72	Cep72	0.700233	0.076409	0.184425	0.217917	0.0148	0.5447	0.124	0.111	0.617661	0.615473	1	0.531069	0.541616	0.571075	1	1	2	1	4.49
D4ABB8	Probable phospholipid-transporting ATPase IIB [OS=Rattus norvegicus]	Atp9b	Atp9b	0.69884	0.0394451	-0.00789716	0.148353	0.0149	0.7931	0.9194	0.2367	0.698758	0.616067	1	0.630476	0.619449	0.636619	9	10	22	6	56.25
Q8C551	RAD51-associated protein 1 [OS=Mus musculus]	Rad51ap1	Rad51ap1	0.697569	0.0630217	-0.034633	0.0431525	0.015	0.6279	0.7349	0.6634	0.681714	0.61661	1	0.661625	0.631591	0.659793	6	2	2	2	5.51
Q62924	A-kinase anchor protein 11 [OS=Rattus norvegicus]	Akap11	Akap11	0.691743	0.16557	0.0575691	0.118001	0.0152	0.199	0.5994	0.3199	0.725733	0.619105	1	0.668736	0.594887	0.667231	2	1	2	1	9.26
Q5M9G6	Smad nuclear interacting protein 1 [OS=Rattus norvegicus]	Snip1; LOC100912429; NEWGENE_1359268	Snip1	0.691506	0.00436215	-0.113342	0.188018	0.0153	0.957	0.3258	0.153	0.748565	0.619207	1	0.657099	0.669815	0.671844	50	18	31	18	96.26
Q9CQZ0	ORM1-like protein 2 [OS=Mus musculus]	Ormdl2	Ormdl2	0.690232	0.47098	-0.0484808	-0.124831	0.0156	0.0065	0.6428	0.4302	0.659887	0.619754	1	0.719527	0.640935	0.888368	7	1	1	1	4.11
Q924A2-2	Isoform 2 of Protein capicua homolog [OS=Mus musculus]	Cic	Cic	0.689572	-0.234346	-0.231159	-0.256539	0.0159	0.1069	0.1008	0.1441	0.705043	0.620038	1	0.84225	0.727787	0.61867	11	11	16	1	51.88
Q9Z2K1	Keratin, type I cytoskeletal 16 [OS=Mus musculus]	Krt16	Krt16	0.687822	-0.331513	-0.60973	-0.423445	0.016	0.0534	0.0109	0.0434	0.671399	0.62079	1	0.900431	0.94731	0.752829	3	2	12	0	28.23
P51432	1-phosphatidylinositol 4,5-bisphosphate phosphodiesterase beta-3 [OS=Mus musculus]	Plcb3	Plcb3	0.687606	-0.380721	-0.15271	0.160598	0.0161	0.0372	0.2143	0.2074	0.711307	0.620883	1	0.636374	0.690208	0.530117	17	19	24	1	79.26
P70618-2	Isoform 2 of Mitogen-activated protein kinase 14 [OS=Rattus norvegicus]	Mapk14	Mapk14	0.684654	0.0972371	-0.336031	-0.242408	0.0163	0.4383	0.0432	0.1623	0.61799	0.622155	1	0.731061	0.785333	0.840089	48	13	31	2	125.73
Q8R080	G2 and S phase-expressed protein 1 [OS=Mus musculus]	Gtse1	Gtse1	0.6841	0.576791	-0.145513	-0.2072	0.0164	0.0023	0.2326	0.2183	0.627809	0.606129	0.973866	0.724772	0.670453	1	4	2	4	2	10.95
Q5DTT3	Protein FAM208B [OS=Mus musculus]	BC016423; Fam208b	Fam208b	0.683985	-0.145017	0.437834	0.502107	0.0166	0.2366	0.0102	0.0072	0.70521	0.622444	1	0.497931	0.459514	0.41557	0	1	1	1	2.36
Q9DAP7	Histone chaperone ASF1B [OS=Mus musculus]	Asf1b	Asf1b	0.682756	-0.122982	-0.0033398	-0.00432376	0.0168	0.2945	0.9545	0.9423	0.660251	0.622974	1	0.662233	0.624418	0.573395	11	2	8	1	25.63
B5DF11	AN1-type zinc finger protein 5 [OS=Rattus norvegicus]	Zfand5	Zfand5	0.681387	0.22484	0.0558676	-0.223254	0.017	0.1017	0.6105	0.1917	0.554215	0.623565	1	0.64697	0.59988	0.701048	33	5	13	4	48.62
Q5PQK8	Transforming growth factor beta regulator 1 [OS=Rattus norvegicus]	Tbrg1	Tbrg1	0.680634	-0.0638356	-0.0278903	0.116133	0.0171	0.5194	0.7786	0.3272	0.684403	0.623891	1	0.631469	0.636069	0.608539	1	1	1	1	1.74
P17702	60S ribosomal protein L28 [OS=Rattus norvegicus]	Rpl28	Rpl28	0.679216	-0.355294	0.183036	0.222353	0.0172	0.0461	0.1254	0.1065	0.550803	0.624505	1	0.47213	0.550093	0.430014	42	8	57	8	148.18
Q6PEV3	WAS/WASL-interacting protein family member 2 [OS=Mus musculus]	Wipf2	Wipf2	0.675476	-0.127818	-0.101604	0.366967	0.0174	0.2786	0.3708	0.0228	0.773141	0.626125	1	0.599502	0.671811	0.614852	15	6	7	6	17.39
Q8K1M4-1	Zinc finger protein GLIS1 [OS=Mus musculus]	Glis1	Glis1	0.674746	-0.235181	0.159409	0.0970965	0.0175	0.1063	0.1712	0.3945	0.586412	0.626443	1	0.548244	0.560911	0.476538	1	1	1	1	1.63
Q6AYK9	Chromodomain Y-like protein [OS=Rattus norvegicus]	Cdyl	Cdyl	0.674717	-0.132543	0.0116447	0.218963	0.0177	0.2679	0.9252	0.1102	0.745543	0.626455	1	0.640558	0.621419	0.566872	9	5	5	5	17.38
Q9JJ19	Na(+)/H(+) exchange regulatory cofactor NHE-RF1 [OS=Rattus norvegicus]	Slc9a3r1	Slc9a3r1	0.670994	0.0622112	0.0827022	-0.0265243	0.0179	0.6323	0.4517	0.9302	0.657933	0.628074	1	0.670141	0.593082	0.619216	82	31	186	31	626.55
Q9CWU4	UPF0690 protein C1orf52 homolog [OS=Mus musculus]	2410004B18Rik	2410004B18Rik	0.668872	-0.0891369	-0.116468	-0.158635	0.0181	0.4076	0.3131	0.3241	0.674594	0.628998	1	0.753002	0.681883	0.641028	38	7	24	7	74.5
Q9WUK2-2	Isoform Short of Eukaryotic translation initiation factor 4H [OS=Mus musculus]	Eif4h	Eif4h	0.668578	0.324862	-0.0178109	-0.0957919	0.0182	0.0339	0.8519	0.5491	0.619748	0.629127	1	0.662295	0.636942	0.797798	69	17	138	1	458.65
Q6NZQ6-1	Zinc finger protein 740 [OS=Mus musculus]	Zfp740	Zfp740	0.667547	0.0543813	0.0545224	0.232531	0.0183	0.6841	0.6199	0.0957	0.721555	0.629576	1	0.614145	0.606227	0.629515	5	1	1	1	3.87
P26051	CD44 antigen [OS=Rattus norvegicus]	Cd44	Cd44	0.666196	-0.452432	-0.0700897	-0.408325	0.0185	0.0247	0.5143	0.0483	0.557385	0.630166	1	0.73973	0.661537	0.483458	4	2	3	2	9.6
Q6GQV7	Erythroid differentiation-related factor 1 [OS=Mus musculus]	2700050L05Rik; Edrf1	Edrf1	0.664218	-0.0940663	-0.0886629	0.119789	0.0186	0.3884	0.4244	0.3148	0.746527	0.631031	1	0.687045	0.671028	0.628672	3	4	4	4	4.61
Q505I4	UPF0235 protein C15orf40 homolog [OS=Rattus norvegicus]	RGD1305713; LOC100363116	RGD1305713	0.664044	0.107659	-0.00844295	-0.128292	0.0188	0.3895	0.915	0.4183	0.674553	0.631107	1	0.737286	0.634811	0.683995	29	3	10	3	32.72
Q60990	RNA-binding motif protein, Y chromosome, family 1 member B [OS=Mus musculus]	Gm3376	Gm3376	0.658861	-0.300201	-0.256246	0.0222358	0.019	0.0669	0.0808	0.7796	0.790134	0.633378	1	0.778049	0.756486	0.614372	2	1	1	1	3.43
Q5U2Z0	Zinc finger protein 367 [OS=Rattus norvegicus]	Zfp367	Zfp367	0.656539	-0.0294256	-0.0672809	0.144436	0.0192	0.7168	0.5298	0.2469	0.698733	0.634399	1	0.632167	0.664685	0.651265	15	2	17	2	77.58
Q5XIN3	TRAF3-interacting protein 1 [OS=Rattus norvegicus]	Traf3ip1	Traf3ip1	0.656261	-0.269238	-0.10934	0.336603	0.0193	0.0825	0.3429	0.0316	0.792352	0.634521	1	0.627466	0.68448	0.567952	5	3	15	3	49.86
Q7TPM1-2	Isoform 2 of Protein PRRC2B [OS=Mus musculus]	Prrc2b	Prrc2b	0.656038	0.0980437	-0.279942	0.0687808	0.0194	0.4341	0.0648	0.5194	0.677807	0.634619	1	0.646251	0.77052	0.824704	11	7	16	1	52.7
Q80U40	RIMS-binding protein 2 [OS=Mus musculus]	Rimbp2	Rimbp2	0.653206	0.101904	0.0169488	0.264742	0.0196	0.4154	0.8848	0.065	0.756504	0.635866	1	0.629675	0.628439	0.674434	12	9	10	1	32.44
Q64337-2	Isoform 2 of Sequestosome-1 [OS=Mus musculus]	Sqstm1	Sqstm1	0.651725	-0.31152	-0.244086	-0.463307	0.0197	0.0623	0.0863	0.0342	0.566766	0.636519	1	0.7814	0.753856	0.607451	29	6	22	1	95.91
Q8BVP5	casein kinase I isoform gamma-2 [OS=Mus musculus]	Csnk1g2	Csnk1g2	0.651025	-0.316639	-0.197102	0.127787	0.0199	0.0596	0.1357	0.2895	0.759833	0.636828	1	0.695426	0.730055	0.586189	23	10	15	1	47.97
Q66L44	Voltage-dependent calcium channel beta subunit-associated regulatory protein [OS=Mus musculus]	Dos; Cbarp	Dos	0.649823	0.0700164	-0.362526	-0.19395	0.02	0.5828	0.036	0.2444	0.770954	0.637359	1	0.881887	0.819436	0.860185	13	7	18	7	51.9
Q71HP2	Protein BHLHb9 [OS=Rattus norvegicus]	Bhlhb9	Bhlhb9	0.644907	-0.0868728	-0.176474	-0.157138	0.0201	0.4166	0.1668	0.328	0.726892	0.639534	1	0.810537	0.722749	0.680512	10	4	4	4	11.22
P09450	transcription factor jun-B [OS=Mus musculus]	Junb	Junb	0.643159	-0.214944	-0.357851	-0.480491	0.0204	0.1274	0.0375	0.0312	0.646686	0.640309	1	0.902269	0.820567	0.706984	9	2	3	1	9.9
Q68FW2	Cell division cycle-associated protein 3 [OS=Rattus norvegicus]	Cdca3	Cdca3	0.642966	0.217148	0.0842495	0.102499	0.0206	0.1106	0.4428	0.3731	0.64846	0.640395	1	0.603988	0.604069	0.702189	38	10	28	10	89.59
P08082	clathrin light chain B [OS=Rattus norvegicus]	Cltb	Cltb	0.642877	0.00374085	-0.113523	-0.212547	0.0207	0.9526	0.3248	0.2092	0.685287	0.640435	1	0.794064	0.692865	0.694664	38	11	121	1	378.88
Q9CTH6	rRNA-processing protein FCF1 homolog [OS=Mus musculus]	Fcf1	Fcf1	0.640069	0.00492828	-0.259895	-0.323509	0.0208	0.9597	0.0781	0.0863	0.683738	0.641682	1	0.855609	0.768345	0.770974	11	2	3	2	4.73
O54834	Rho GTPase-activating protein 6 [OS=Mus musculus]	Arhgap6	Arhgap6	0.638769	-0.347704	-0.23393	-0.436053	0.021	0.0487	0.0977	0.0407	0.660353	0.642261	1	0.893391	0.755321	0.593556	1	1	1	1	2.54
P41243	Megakaryocyte-associated tyrosine-protein kinase [OS=Rattus norvegicus]	Matk	Matk	0.637278	-0.0798566	0.117841	0.199193	0.0211	0.4458	0.2916	0.1343	0.726664	0.642925	1	0.632951	0.592498	0.560593	8	3	5	2	11.56
Q69ZF8	E3 ubiquitin-protein ligase MSL2 [OS=Mus musculus]	Msl2	Msl2	0.635893	-0.133473	0.004537	0.319116	0.0212	0.265	0.9817	0.0382	0.720869	0.643542	1	0.57782	0.641522	0.584833	4	2	2	2	6.68
Q8BHG9	CGG triplet repeat-binding protein 1 [OS=Mus musculus]	Cggbp1	Cggbp1	0.635727	0.113914	0.0185414	0.268524	0.0214	0.3622	0.8738	0.0628	0.75912	0.643617	1	0.630197	0.635398	0.687602	35	8	17	8	61.52
P48725-1	Pericentrin [OS=Mus musculus]	Pcnt	Pcnt	0.634006	-0.0848685	0.0600608	0.241725	0.0215	0.4261	0.5808	0.0854	0.730549	0.644384	1	0.61785	0.618109	0.582797	3	9	12	9	32.96
Q6PGH2	Jupiter microtubule associated homolog 2 [OS=Mus musculus]	Hn1l; Jpt2	Hn1l	0.633596	0.112276	-0.180666	-0.203724	0.0217	0.3691	0.1607	0.224	0.760747	0.644568	1	0.876127	0.730558	0.789684	43	8	64	1	190.65
Q9WU62-1	Inner centromere protein [OS=Mus musculus]	Incenp	Incenp	0.632797	-0.0645692	-0.0460346	0.341689	0.0218	0.5146	0.661	0.0295	0.78037	0.644925	1	0.615803	0.665836	0.636693	8	9	15	9	47.67
Q91Z58	Uncharacterized protein C6orf132 homolog [OS=Mus musculus]	AI661453	AI661453	0.629948	-0.158182	-0.0329518	0.103064	0.0221	0.2083	0.7433	0.3717	0.739109	0.6462	1	0.68815	0.661129	0.592473	4	5	31	5	75.14
O88943-1	Potassium voltage-gated channel subfamily KQT member 2 [OS=Rattus norvegicus]	Kcnq2	Kcnq2	0.629404	0.167907	0.0693562	0.0185575	0.0222	0.1937	0.5252	0.8012	0.680726	0.646443	1	0.672026	0.616101	0.692145	8	5	14	5	39.65
Q99L90	Microspherule protein 1 [OS=Mus musculus]	Mcrs1	Mcrs1	0.629002	-0.0697608	-0.141673	-0.00361432	0.0223	0.4903	0.2426	0.9382	0.762192	0.646624	1	0.764103	0.713344	0.679672	14	4	24	4	76.56
Q8CD94	protein lin-52 homolog [OS=Mus musculus]	Lin52; Gm7020	Lin52	0.628236	-0.0732358	0.082909	-0.0853816	0.0226	0.4743	0.4506	0.6022	0.692083	0.646967	1	0.734278	0.610835	0.580601	21	1	3	1	13.19
P62870	Elongin-B [OS=Rattus norvegicus]	Tceb2; Elob	Tceb2	0.625099	0.081405	0.0982204	0.0170117	0.023	0.5177	0.3753	0.8121	0.654186	0.648375	1	0.646517	0.605702	0.640862	91	11	101	11	320.15
Q9D818-1	Suppressor APC domain-containing protein 2 [OS=Mus musculus]	2010317E24Rik; Sapcd2	Sapcd2	0.624159	0.022694	0.0348957	0.0251825	0.0232	0.9112	0.757	0.7622	0.664433	0.648798	1	0.652936	0.633293	0.643334	12	4	8	4	29.12
Q9JJN6	beta-catenin-interacting protein 1 [OS=Mus musculus]	Ctnnbip1	Ctnnbip1	0.623667	0.190712	0.0291891	0.091173	0.0233	0.151	0.7985	0.4189	0.73254	0.649019	1	0.687679	0.63602	0.725907	30	2	5	2	19.72
Q6A085	zinc finger protein 629 [OS=Mus musculus]	Zfp629	Zfp629	0.622911	-0.199815	-0.0996159	0.166782	0.0234	0.1447	0.3796	0.1952	0.79058	0.649359	1	0.70427	0.695781	0.60579	7	6	12	5	37.42
Q2YDU3-1	OTU domain-containing protein 5 [OS=Rattus norvegicus]	Otud5	Otud5	0.622049	-0.0415611	0.0209902	-0.115122	0.0237	0.6414	0.8586	0.4658	0.678786	0.649748	1	0.735171	0.640363	0.622178	18	6	16	6	38.28
Q9JJ11	Transforming acidic coiled-coil-containing protein 3 [OS=Mus musculus]	Tacc3	Tacc3	0.620832	0.265278	0.178097	0.0853627	0.024	0.0673	0.1343	0.4403	0.65489	0.650296	1	0.617265	0.574776	0.690804	6	5	14	5	41.07
Q6JHU9	CREB-binding protein [OS=Rattus norvegicus]	Crebbp	Crebbp	0.615705	-0.119472	-0.0312174	0.127821	0.0247	0.3028	0.7561	0.2892	0.81178	0.652611	1	0.742951	0.666886	0.613885	7	18	26	5	73.92
B5DF93	Protein PAT1 homolog 1 [OS=Rattus norvegicus]	Patl1	Patl1	0.612662	-0.133372	-0.0832787	0.107326	0.0248	0.2657	0.4498	0.3577	0.770399	0.653989	1	0.715167	0.692851	0.631671	27	14	19	7	68.32
Q8BFY7	Protein PIMREG [OS=Mus musculus]	Fam64a; Pimreg	Pimreg	0.612196	-0.0281421	-0.178262	0.136649	0.025	0.7252	0.164	0.2657	0.769697	0.6542	1	0.700139	0.740241	0.725941	4	1	1	1	2.79
Q5FVP5	WD repeat-containing protein 89 [OS=Rattus norvegicus]	Wdr89	Wdr89	0.612115	-0.471429	-0.203652	-0.112773	0.0251	0.0214	0.1262	0.4772	0.690721	0.654237	1	0.74688	0.753426	0.543408	11	3	5	3	16.72
Q5XIM5	Protein CDV3 homolog [OS=Rattus norvegicus]	Cdv3	Cdv3	0.61102	-0.00254162	-0.139543	-0.0823771	0.0255	0.9047	0.2476	0.6174	0.710515	0.654733	1	0.752266	0.721226	0.719956	81	17	117	17	393
Q9CQW7-1	Apoptogenic protein 1, mitochondrial [OS=Mus musculus]	2810002N01Rik; Apopt1	Apopt1	0.689988	-0.126042	-0.0227488	0.363666	0.0157	0.2839	0.8134	0.0236	0.714226	0.619859	1	0.555088	0.629711	0.57703	11	2	2	2	6.21
Q6P6L0	Filamin A-interacting protein 1-like [OS=Mus musculus]	Filip1l	Filip1l	0.609971	-0.425345	-0.266221	-0.385687	0.0258	0.0286	0.0726	0.0566	0.61575	0.65521	1	0.804466	0.787991	0.586786	1	1	1	1	0
Q63347	26S proteasome regulatory subunit 7 [OS=Rattus norvegicus]	Psmc2	Psmc2	0.609778	0.289382	0.175975	-0.115206	0.0259	0.0516	0.1382	0.4654	0.567354	0.655298	1	0.614518	0.580049	0.708888	71	28	214	27	740.64
Q4QY64	ATPase family AAA domain-containing protein 5 [OS=Mus musculus]	Atad5	Atad5	0.609578	-0.0390442	0.0964385	0.0860163	0.0261	0.657	0.3847	0.4381	0.73311	0.655388	1	0.690678	0.61301	0.596643	1	2	2	2	6.37
Q8R123-1	FAD synthase [OS=Mus musculus]	Flad1	Flad1	0.609574	-0.534636	-0.093053	0.122249	0.0262	0.0143	0.4051	0.3059	0.708496	0.65539	1	0.650934	0.699056	0.482581	7	2	3	2	9.68
Q6RUT8-1	Coiled-coil domain-containing protein 154 [OS=Mus musculus]	Ccdc154	Ccdc154	0.60905	0.0237245	-0.0391278	-0.110131	0.0263	0.9018	0.7051	0.4874	0.684891	0.655628	1	0.73922	0.673653	0.684823	2	1	1	1	2.05
Q6P3E0	Thymocyte nuclear protein 1 [OS=Rattus norvegicus]	Thyn1	Thyn1	0.607644	-0.0291156	-0.0876044	0.254628	0.0268	0.7196	0.4286	0.0728	0.732059	0.656267	1	0.613614	0.697353	0.68342	12	3	4	3	9.46
Q7TSK2	Seizure protein 6 [OS=Mus musculus]	Sez6	Sez6	0.606708	0.0109856	0.00215827	0.209692	0.0269	0.9961	0.9989	0.121	0.769604	0.656693	1	0.665493	0.655712	0.660724	2	2	2	2	7.08
Q920G9	Germ cell-less protein-like 1 [OS=Mus musculus]	Gmcl1	Gmcl1	0.605969	0.0981917	0.0990544	0.173274	0.0272	0.4331	0.3713	0.181	0.795025	0.65703	1	0.70505	0.613432	0.656637	2	1	2	1	0
P97440	Histone RNA hairpin-binding protein [OS=Mus musculus]	Slbp	Slbp	0.605558	0.108825	-0.10704	-0.0498121	0.0273	0.3836	0.3502	0.7898	0.722003	0.657217	1	0.747367	0.707834	0.763292	22	9	14	9	43.1
Q6AXW0	Borealin [OS=Rattus norvegicus]	Cdca8	Cdca8	0.605439	-0.0103964	0.158387	0.419101	0.0274	0.8498	0.1732	0.0141	0.757511	0.657271	1	0.566535	0.588932	0.584704	47	9	16	8	55.48
Q8CFC9	Leucine zipper putative tumor suppressor 1 [OS=Rattus norvegicus]	Lzts1	Lzts1	0.60529	0.202208	-0.0282347	0.0138687	0.0276	0.1334	0.7756	0.8308	0.757097	0.657339	1	0.749853	0.670331	0.771187	2	1	1	1	3.64
P16261	Graves disease carrier protein [OS=Rattus norvegicus]	Slc25a16	Slc25a16	0.604984	-0.165738	0.00594823	0.123533	0.0277	0.1948	0.9713	0.3018	0.709288	0.657479	1	0.651081	0.654773	0.583713	15	5	7	5	19.66
Q5M9I5	Cytochrome b-c1 complex subunit 6, mitochondrial [OS=Rattus norvegicus]	Uqcrh	Uqcrh	0.64469	-0.452108	-0.292569	-0.513009	0.0203	0.0248	0.0579	0.0255	0.664206	0.63963	1	0.947837	0.783432	0.572668	64	5	26	5	104.58
Q2KHI9-2	Isoform 2 of DNA helicase MCM9 [OS=Mus musculus]	Mcm9	Mcm9	0.600483	-0.469734	-0.205163	-0.0329756	0.0283	0.0215	0.1247	0.8919	0.698027	0.659533	1	0.714165	0.76032	0.549026	1	1	2	1	0
P0CD96	Overexpressed in colon carcinoma 1 protein homolog [OS=Rattus norvegicus]	OCC-1	OCC-1	0.598725	-0.0141209	0.373395	0.286397	0.0284	0.8261	0.0171	0.0528	0.721343	0.660337	1	0.591463	0.509756	0.504791	54	2	7	2	23.44
Q6F6B3	Protein TANC1 [OS=Rattus norvegicus]	Tanc1	Tanc1	0.598052	-0.0763879	-0.224681	-0.442283	0.0286	0.4615	0.1055	0.0396	0.616451	0.660646	1	0.837604	0.771977	0.732165	4	3	10	3	32.01
Q9CQE2	Transmembrane protein 223 [OS=Mus musculus]	Tmem223	Tmem223	0.597504	-0.160446	0.21923	0.0676589	0.0287	0.2036	0.0821	0.525	0.633507	0.660897	1	0.604483	0.567726	0.507972	13	3	5	3	14.64
P19246	Neurofilament heavy polypeptide [OS=Mus musculus]	Nefh	Nefh	0.597431	-0.0886091	-0.066493	-0.460647	0.0288	0.4098	0.5342	0.0348	0.624741	0.66093	1	0.859742	0.692105	0.650875	11	13	30	1	91.65
P58242	acid sphingomyelinase-like phosphodiesterase 3B [OS=Mus musculus]	Smpdl3b	Smpdl3b	0.593968	0.100515	0.00917952	0.0202385	0.0292	0.4233	0.9448	0.7912	0.659527	0.662518	1	0.65034	0.658316	0.705818	2	1	1	1	3.61
Q9CR41-1	Huntingtin-interacting protein K [OS=Mus musculus]	2310003F16Rik; Hypk	Hypk	0.593778	-0.0181124	-0.0763624	-0.204063	0.0294	0.7978	0.4807	0.2233	0.692728	0.662605	1	0.797979	0.698622	0.689906	53	9	76	9	288.23
Q568Y7	Noelin-2 [OS=Rattus norvegicus]	Olfm2	Olfm2	0.592032	-0.167284	0.109251	0.36639	0.0295	0.1921	0.3259	0.0229	0.805762	0.663408	1	0.625046	0.615025	0.547691	4	1	1	1	2.77
Q8BJ73-1	R-spondin-4 [OS=Mus musculus]	Rspo4	Rspo4	0.590891	0.0362815	0.371073	0.368966	0.0297	0.8152	0.0172	0.0223	0.697733	0.663933	1	0.540281	0.513358	0.526432	3	1	2	1	3.67
Q8CF90	Transcription factor MafA [OS=Mus musculus]	Mafa	Mafa	0.590885	0.202687	0.165404	0.237637	0.0298	0.1327	0.1583	0.0891	0.714798	0.663936	1	0.606244	0.592017	0.681317	19	8	31	8	90.95
Q9QX47-2	Isoform 2 of Protein SON [OS=Mus musculus]	Son	Son	0.589239	0.128223	-0.306007	-0.382601	0.0301	0.3079	0.0534	0.0581	0.653839	0.664694	1	0.852404	0.821748	0.898127	15	27	84	1	266.39
Q69ZL1	FYVE, RhoGEF and PH domain-containing protein 6 [OS=Mus musculus]	Fgd6	Fgd6	0.588472	0.0728171	-0.454101	-0.515599	0.0302	0.5658	0.0215	0.0248	0.699503	0.647835	0.974119	1	0.887488	0.933432	4	5	5	5	15.98
Q62315	Protein Jumonji [OS=Mus musculus]	Jarid2	Jarid2	0.588433	0.114121	0.526447	0.202421	0.0303	0.3604	0.0054	0.1299	0.628437	0.665065	1	0.546169	0.46173	0.499737	3	2	4	2	2.78
Q63518	Myosin-binding protein C, slow-type [OS=Rattus norvegicus]	Mybpc1	Mybpc1	0.587687	-0.0397188	-0.00699174	-0.0747146	0.0305	0.652	0.9259	0.6607	0.766315	0.665409	1	0.807047	0.668641	0.650484	1	1	1	1	2.15
A4L691	PIN2/TERF1-interacting telomerase inhibitor 1 [OS=Rattus norvegicus]	Pinx1	Pinx1	0.58657	-0.249626	-0.370116	0.00734572	0.0306	0.0948	0.0348	0.8721	0.77342	0.665924	1	0.769492	0.860678	0.723929	10	2	3	2	4.11
Q8BLH7	HIRA-interacting protein 3 [OS=Mus musculus]	Hirip3	Hirip3	0.583928	-0.521401	-0.146457	-0.282971	0.0309	0.0153	0.2291	0.1181	0.724976	0.667145	1	0.882077	0.738428	0.514459	11	8	15	8	32.67
B2RYR0	E3 ubiquitin-protein ligase RNF168 [OS=Rattus norvegicus]	Rnf168	Rnf168	0.583772	-0.00147071	0.0527784	0.12573	0.031	0.9135	0.6316	0.2954	0.741846	0.667217	1	0.679932	0.643249	0.642594	3	2	3	2	8.62
Q99K74-1	Mediator of RNA polymerase II transcription subunit 24 [OS=Mus musculus]	Med24	Med24	0.583443	-0.329438	0.0850921	-0.0853816	0.0313	0.0541	0.4372	0.6023	0.63448	0.667369	1	0.673163	0.629145	0.500703	18	13	20	1	62.9
Q66H99	Nucleolar protein 10 [OS=Rattus norvegicus]	Nol10	Nol10	0.581001	-0.12723	-0.123295	0.102147	0.032	0.2807	0.2921	0.3743	0.807503	0.6685	1	0.752307	0.728143	0.666679	19	13	19	13	64.5
Q9DBA6	Peroxisomal leader peptide-processing protease [OS=Mus musculus]	Tysnd1	Tysnd1	0.579682	-0.0120379	-0.129131	0.0220978	0.0323	0.8403	0.2748	0.7801	0.764985	0.669111	1	0.753357	0.731763	0.725682	6	2	2	2	5.24
Q8BGH4	Receptor expression-enhancing protein 1 [OS=Mus musculus]	Reep1	Reep1	0.578461	-0.293745	-0.167624	-0.0283506	0.0326	0.0694	0.1818	0.919	0.755015	0.669678	1	0.769998	0.752187	0.61362	12	3	3	3	8.89
Q07139	Protein ECT2 [OS=Mus musculus]	Ect2	Ect2	0.576961	0.105363	0.109025	0.244588	0.0328	0.3997	0.3268	0.0818	0.732371	0.670375	1	0.618163	0.621581	0.668675	9	7	9	7	27.48
Q149G0	UPF0561 protein C2orf68 homolog [OS=Mus musculus]	0610030E20Rik	0610030E20Rik	0.575717	0.0136685	-0.0170304	-0.0961326	0.0332	0.9761	0.8564	0.5472	0.673181	0.670953	1	0.719566	0.67892	0.685383	4	1	2	1	6.15
P54282-1	Voltage-dependent P/Q-type calcium channel subunit alpha-1A [OS=Rattus norvegicus]	Cacna1a	Cacna1a	0.575414	-0.233928	-0.123723	0.0601705	0.0334	0.1073	0.2895	0.5644	0.756702	0.671094	1	0.725792	0.731186	0.621739	4	9	18	1	28.44
Q9JL04	Formin-2 [OS=Mus musculus]	Fmn2	Fmn2	0.574553	0.0140847	-0.112142	-0.185964	0.0335	0.9737	0.3316	0.2603	0.706437	0.671494	1	0.803626	0.725773	0.732893	2	2	2	2	5.84
Q91ZM2-4	Isoform 4 of SH2B adapter protein 1 [OS=Mus musculus]	Sh2b1	Sh2b1	0.57431	0.0489486	0.0415211	0.0237245	0.0337	0.72	0.7108	0.7706	0.747186	0.671607	1	0.735	0.652554	0.675074	7	4	5	1	15.54
Q9D162	Coiled-coil domain-containing protein 167 [OS=Mus musculus]	Ccdc167	Ccdc167	0.573762	-0.461933	-0.12795	0.181111	0.0339	0.0228	0.2786	0.165	0.787158	0.671863	1	0.694292	0.734171	0.533018	9	1	3	1	5.79
Q8BWD8	Cyclin-dependent kinase 19 [OS=Mus musculus]	Cdk19	Cdk19	0.573405	0.0543701	0.105857	0.100657	0.0341	0.6843	0.3428	0.3797	0.686436	0.672029	1	0.640176	0.624485	0.648468	16	7	7	5	22.75
Q8BW86-1	Rho guanine nucleotide exchange factor 33 [OS=Mus musculus]	Arhgef33	Arhgef33	0.573365	-0.222481	-0.246433	-0.0540484	0.0342	0.1182	0.085	0.7669	0.738222	0.672048	1	0.766403	0.79723	0.683298	2	1	2	1	4.76
P41739	Aryl hydrocarbon receptor nuclear translocator [OS=Rattus norvegicus]	Arnt	Arnt	0.573158	-0.273801	0.365392	0.0970965	0.0343	0.0801	0.0182	0.3943	0.576596	0.672144	1	0.539067	0.521757	0.431565	3	2	2	2	2.83
Q5SWP3	NAC-alpha domain-containing protein 1 [OS=Mus musculus]	Nacad	Nacad	0.572734	0.197286	0.000230042	-0.0841897	0.0345	0.1401	0.9843	0.6066	0.749385	0.672341	1	0.794417	0.672234	0.770743	1	1	1	1	3.42
Q6P6Q2	keratin, type II cytoskeletal 5 [OS=Rattus norvegicus]	Krt5	Krt5	0.572588	-0.168323	0.00604996	-0.311095	0.0346	0.1902	0.9705	0.0966	0.609587	0.67241	1	0.756283	0.669596	0.595858	14	13	42	6	126.05
O08699	15-hydroxyprostaglandin dehydrogenase [NAD(+)] [OS=Rattus norvegicus]	Hpgd	Hpgd	0.572273	0.0992091	0.572483	0.394571	0.0348	0.4292	0.0043	0.0189	0.641853	0.672556	1	0.488268	0.452266	0.484461	18	4	6	4	19.46
Q6A098	Selenocysteine insertion sequence-binding protein 2-like [OS=Mus musculus]	Secisbp2l	Secisbp2l	0.571588	0.259836	-0.0125259	0.0700899	0.0349	0.0709	0.8854	0.5131	0.813933	0.672876	1	0.775335	0.678743	0.812688	1	1	2	1	5.6
Q6RVG2-1	Electroneutral sodium bicarbonate exchanger 1 [OS=Rattus norvegicus]	Slc4a8	Slc4a8	0.571574	0.0306973	0.0290712	-0.0295473	0.035	0.8531	0.7999	0.9116	0.66767	0.672882	1	0.681486	0.659459	0.673641	7	4	4	3	16.31
Q9WUB7	Chloride channel protein ClC-Ka [OS=Mus musculus]	Clcnka	Clcnka	0.571414	-0.356561	-0.18983	-0.203394	0.0352	0.0452	0.1455	0.225	0.789841	0.672957	1	0.909427	0.767594	0.59951	1	1	3	1	8.14
O09126	Semaphorin-4D [OS=Mus musculus]	Sema4d	Sema4d	0.570933	-0.0315362	-0.0868514	0.0815901	0.0353	0.7052	0.4327	0.4579	0.781071	0.673181	1	0.738124	0.714952	0.699494	9	7	10	7	30.77
Q5M951	UPF0688 protein C1orf174 homolog [OS=Rattus norvegicus]	RGD1304567	RGD1304567	0.570628	0.151276	0.100332	-0.0922767	0.0354	0.2349	0.3643	0.5668	0.613092	0.673324	1	0.653587	0.628088	0.697524	28	2	6	2	23.86
Q91Y13	Protocadherin alpha-7 [OS=Mus musculus]	Pcdha7	Pcdha7	0.570476	-0.341349	-0.10689	0.0635569	0.0356	0.0498	0.351	0.5455	0.724676	0.673394	1	0.693444	0.725181	0.572388	4	2	5	1	17.74
Q80TK0	Uncharacterized protein KIAA1107 [OS=Mus musculus]	A830010M20Rik	A830010M20Rik	0.570458	0.0374477	0.00387558	0.10718	0.0357	0.8063	0.9874	0.3582	0.714042	0.673403	1	0.662917	0.671597	0.689257	8	9	22	9	62.95
Q8BRV5	Uncharacterized protein KIAA1671 [OS=Mus musculus]	2900026A02Rik	2900026A02Rik	0.569613	-0.0347294	-0.259261	-0.262934	0.0359	0.6847	0.079	0.1364	0.722497	0.673798	1	0.866935	0.806445	0.787264	4	1	1	1	2.79
Q7TS68	Putative methyltransferase NSUN6 [OS=Mus musculus]	Nsun6	Nsun6	0.569284	-0.288784	-0.0236864	0.0172596	0.036	0.0714	0.8066	0.8106	0.756254	0.673951	1	0.747261	0.685108	0.560823	4	2	2	2	6.77
Q9ESG9	Membrane-associated tyrosine- and threonine-specific cdc2-inhibitory kinase [OS=Mus musculus]	Pkmyt1	Pkmyt1	0.568443	-0.0978834	0.146399	0.0441434	0.0364	0.3726	0.2022	0.6572	0.691835	0.674344	1	0.670987	0.609272	0.569305	8	2	2	2	5.45
Q9JIS1-9	Isoform 9 of Regulating synaptic membrane exocytosis protein 2 [OS=Rattus norvegicus]	Rims2	Rims2	0.567572	-0.185685	-0.0585046	0.182983	0.0366	0.1647	0.5774	0.1618	0.695451	0.674752	1	0.612609	0.702677	0.617815	21	30	101	28	257.15
Q9CYN2	Signal peptidase complex subunit 2 [OS=Mus musculus]	Spcs2	Spcs2	0.567529	0.0636077	-0.00127211	0.122523	0.0367	0.6241	0.9726	0.3051	0.758861	0.674772	1	0.697074	0.675367	0.70581	53	13	69	13	230.78
O89090	Transcription factor Sp1 [OS=Mus musculus]	Sp1	Sp1	0.56728	-0.173778	-0.00957698	-0.102315	0.0368	0.1794	0.9077	0.5201	0.694598	0.674888	1	0.745647	0.679383	0.602285	9	4	22	2	58.94
D3ZVK1	DNA helicase MCM8 [OS=Rattus norvegicus]	Mcm8	Mcm8	0.567113	-0.115264	-0.272434	-0.0205864	0.037	0.3166	0.0691	0.9629	0.834106	0.674966	1	0.846094	0.815254	0.752653	4	3	4	2	7.34
P59241	Aurora kinase A [OS=Rattus norvegicus]	Aurka	Aurka	0.566118	-0.0659662	-0.18116	0.0380437	0.0372	0.5095	0.1599	0.6909	0.773408	0.675432	1	0.75328	0.765801	0.731574	16	4	7	4	15.88
Q9CQZ7	DNA-directed RNA polymerase III subunit RPC10 [OS=Mus musculus]	Polr3k	Polr3k	0.56514	-0.0339807	0.0307987	-0.118432	0.0374	0.6899	0.7873	0.4521	0.607223	0.67589	1	0.659173	0.661614	0.646212	10	1	1	1	4.04
B0BN28	Spindle and kinetochore-associated protein 1 [OS=Rattus norvegicus]	Ska1	Ska1	0.564058	0.0999841	0.16828	0.314496	0.0375	0.4258	0.1524	0.0399	0.743387	0.676397	1	0.597781	0.601928	0.645123	2	1	1	1	2.61
Q66HC7	transcription factor SPT20 homolog [OS=Rattus norvegicus]	Fam48a; Supt20; Supt20h	Fam48a	0.56384	-0.0801336	-0.055848	0.14258	0.0377	0.445	0.5946	0.251	0.779049	0.676499	1	0.705739	0.703201	0.665207	11	4	4	4	13.93
P47856	glutamine--fructose-6-phosphate aminotransferase [isomerizing] 1 [OS=Mus musculus]	Gfpt1	Gfpt1	0.563837	-0.0223787	-0.008053	0.01148	0.0378	0.769	0.9181	0.8447	0.733354	0.6765	1	0.727541	0.680287	0.669816	56	36	173	36	575.69
Q9D115	Zinc finger protein 706 [OS=Mus musculus]	Zfp706	Zfp706	0.563695	-0.0173944	0.137993	0.614036	0.0379	0.803	0.2265	0.0036	0.816108	0.676567	1	0.533217	0.614852	0.607484	16	2	7	2	13.96
Q9CQ13	Coordinator of PRMT5 and differentiation stimulator [OS=Mus musculus]	2410022L05Rik; Coprs	2410022L05Rik	0.563206	-0.254116	-0.227674	-0.154733	0.0381	0.0924	0.1036	0.3368	0.659766	0.676796	1	0.734462	0.792492	0.664505	8	1	1	1	2.83
Q3TAA7	Serine/threonine-protein kinase 11-interacting protein [OS=Mus musculus]	Stk11ip	Stk11ip	0.561415	-0.186502	0.236562	0.0283606	0.0383	0.1629	0.0666	0.7441	0.676931	0.677637	1	0.663754	0.575155	0.505408	1	1	1	1	4.37
Q9D1C1	Ubiquitin-conjugating enzyme E2 C [OS=Mus musculus]	Ube2c	Ube2c	0.561284	0.139494	0.0413913	-0.0111575	0.0385	0.2708	0.7121	0.9803	0.65678	0.677699	1	0.661879	0.658531	0.725385	36	5	16	5	53.38
P48379	DNA-binding protein RFX2 [OS=Mus musculus]	Rfx2	Rfx2	0.560214	-0.228633	0.108738	0.122423	0.0388	0.1117	0.3277	0.3052	0.761044	0.678201	1	0.699128	0.628963	0.536784	11	6	10	2	21.91
Q62688	Inactive phospholipase C-like protein 1 [OS=Rattus norvegicus]	Plcl1	Plcl1	0.559994	-0.000334529	-0.0718931	-0.0165317	0.0389	0.9229	0.5048	0.9858	0.765386	0.678305	1	0.774207	0.712963	0.712798	5	5	6	5	16.92
B4F7A7	Centrosomal protein of 57 kDa [OS=Rattus norvegicus]	Cep57	Cep57	0.559882	-0.158034	-0.119938	0.0500488	0.039	0.2086	0.3022	0.6212	0.734323	0.678358	1	0.709285	0.737164	0.660679	4	2	2	1	6.89
Q91UZ5	inositol monophosphatase 2 [OS=Mus musculus]	Impa2	Impa2	0.559148	-0.0369998	0.0166175	0.000559281	0.0393	0.668	0.8884	0.9127	0.663688	0.678703	1	0.66343	0.67093	0.653942	16	4	7	4	24.86
P62322	U6 snRNA-associated Sm-like protein LSm5 [OS=Mus musculus]	Lsm5; LOC100044729; LOC102641341	Lsm5	0.558281	0.141511	0.0297832	-0.225687	0.0394	0.2646	0.7946	0.1877	0.711049	0.679111	1	0.831454	0.665235	0.733794	65	3	33	3	106.44
Q0P5V2	Sine oculis-binding protein homolog [OS=Mus musculus]	Sobp	Sobp	0.558206	0.0170107	0.0938979	0.137825	0.0396	0.9538	0.3943	0.2626	0.700623	0.679146	1	0.636788	0.636352	0.643899	5	3	3	3	5.72
Q921J4	ubiquitin-conjugating enzyme E2 S [OS=Mus musculus]	Ube2s	Ube2s	0.558059	0.173459	-0.0067014	0.212833	0.0397	0.1801	0.9279	0.1174	0.751054	0.679215	1	0.64804	0.682378	0.769558	24	5	8	5	28.83
P97411-1	Islet cell autoantigen 1 [OS=Mus musculus]	Ica1	Ica1	0.556327	-0.317256	-0.0629756	0.319546	0.0401	0.0592	0.5524	0.0381	0.787565	0.680031	1	0.631093	0.710373	0.570142	37	17	35	1	110.83
Q922G2	Protein FAM76A [OS=Mus musculus]	Fam76a	Fam76a	0.554479	0.063958	0.0465652	0.33265	0.0408	0.6219	0.6793	0.0327	0.84708	0.680903	1	0.672647	0.659277	0.689161	6	2	3	2	7.14
Q9DB42	Zinc finger protein 593 [OS=Mus musculus]	Zfp593	Zfp593	0.554327	0.0463379	-0.164003	0.0626871	0.041	0.7401	0.1894	0.5498	0.81121	0.680975	1	0.776716	0.762958	0.787862	25	3	7	3	14.84
Q9Z2C8-1	Y-box-binding protein 2 [OS=Mus musculus]	Ybx2	Ybx2	0.554319	-0.026178	-0.0496952	0.189004	0.0411	0.7408	0.6346	0.1516	0.768649	0.680978	1	0.674267	0.704844	0.69217	50	14	165	10	578.25
Q8K182	Complement component C8 alpha chain [OS=Mus musculus]	C8a	C8a	0.553999	0.107448	0.0711697	0.248736	0.0412	0.3901	0.5139	0.0788	0.841722	0.681129	1	0.708422	0.648344	0.698474	2	1	1	1	3.36
Q66JQ7	kinetochore scaffold 1 [OS=Mus musculus]	Casc5; Knl1	Casc5	0.553876	-0.0502227	0.105575	-0.00165973	0.0414	0.5908	0.344	0.9276	0.673302	0.681188	1	0.674077	0.633119	0.611458	1	1	1	1	3.62
P97832	heart- and neural crest derivatives-expressed protein 1 [OS=Rattus norvegicus]	Hand1	Hand1	0.553516	-0.101404	-0.0592532	0.0246659	0.0415	0.3592	0.5726	0.7655	0.703493	0.681358	1	0.691568	0.709925	0.661739	3	1	1	1	2.06
Q9D975	sulfiredoxin-1 [OS=Mus musculus]	Srxn1	Srxn1	0.551946	0.411342	0.122722	-0.0677517	0.0417	0.0131	0.2746	0.6953	0.657479	0.6821	1	0.689092	0.626477	0.833165	7	1	1	1	2.47
Q4QR88	TIMELESS-interacting protein [OS=Rattus norvegicus]	Tipin	Tipin	0.550413	0.00134511	0.146937	0.211283	0.0418	0.936	0.201	0.1194	0.811926	0.682825	1	0.701317	0.616704	0.617279	15	5	8	5	27.63
A2A7S8-2	Isoform 2 of Uncharacterized protein KIAA1522 [OS=Mus musculus]	C77080	C77080	0.549945	-0.0736455	-0.241829	-0.0544734	0.0419	0.4731	0.0877	0.7648	0.821765	0.683046	1	0.853387	0.807695	0.7675	17	17	134	2	381.46
Q6PDY2	2-aminoethanethiol dioxygenase [OS=Mus musculus]	Ado	Ado	0.54781	-0.0266139	0.058019	-0.104788	0.0423	0.739	0.5954	0.5098	0.621727	0.684058	1	0.668566	0.657094	0.645083	28	5	8	5	23.71
P51830	Adenylate cyclase type 9 [OS=Mus musculus]	Adcy9	Adcy9	0.547508	-0.255865	-0.137626	-0.167881	0.0425	0.0912	0.2531	0.2992	0.720525	0.684201	1	0.809443	0.752685	0.630362	4	5	5	5	15.36
Q9WVS8-1	Mitogen-activated protein kinase 7 [OS=Mus musculus]	Mapk7	Mapk7	0.546819	-0.131748	-0.188549	-0.123815	0.0426	0.2698	0.1477	0.4334	0.746307	0.684528	1	0.813185	0.780099	0.712016	8	5	7	5	27.79
A2A3V1	A-kinase anchor protein 17B [OS=Mus musculus]	Akap17b	Akap17b	0.546493	-0.428239	-0.2824	0.0334596	0.0428	0.0281	0.0632	0.7157	0.773846	0.684683	1	0.756105	0.832722	0.618853	2	1	1	1	4.11
A2AWP8-1	Rho guanine nucleotide exchange factor 10-like protein [OS=Mus musculus]	Arhgef10l	Arhgef10l	0.545534	-0.0504611	-0.261934	-0.303978	0.0433	0.5892	0.0766	0.1017	0.77172	0.685138	1	0.952722	0.821539	0.7933	1	1	1	1	3.8
Q8K4B0	Metastasis-associated protein MTA1 [OS=Mus musculus]	Mta1	Mta1	0.54497	0.0434461	0.0701417	0.127222	0.0434	0.7625	0.5206	0.2919	0.828441	0.685406	1	0.758514	0.652879	0.67284	50	31	92	3	332.58
Q63199	Tumor necrosis factor receptor superfamily member 6 [OS=Rattus norvegicus]	Fas	Fas	0.544943	0.23039	-0.609311	-0.725854	0.0436	0.0952	0.0112	0.0103	0.537151	0.558759	0.815209	0.888382	0.852405	1	5	1	1	1	4.41
Q9Z248-1	Zinc finger protein AEBP2 [OS=Mus musculus]	Aebp2	Aebp2	0.544887	0.00701476	0.102818	-0.00544967	0.0437	0.9741	0.3546	0.9492	0.648926	0.685445	1	0.651382	0.638295	0.641406	11	4	34	4	93.71
A2RSJ4	UHRF1-binding protein 1-like [OS=Mus musculus]	Uhrf1bp1l	Uhrf1bp1l	0.543136	-0.0202092	-0.112629	-0.199175	0.0443	0.7851	0.3286	0.233	0.756679	0.686278	1	0.868699	0.742001	0.73168	3	4	7	4	12.3
Q8C827	zinc finger protein 62 [OS=Mus musculus]	Zfp62	Zfp62	0.542787	-0.0517179	-0.156384	0.209066	0.0444	0.5821	0.2061	0.1219	0.816072	0.686443	1	0.705982	0.765034	0.738095	4	4	4	4	14.14
Q7TPM1-1	Protein PRRC2B [OS=Mus musculus]	Prrc2b	Prrc2b	0.542513	-0.00663372	-0.276764	-0.0301555	0.0446	0.8759	0.0672	0.9095	0.767292	0.686574	1	0.783499	0.831767	0.827951	17	21	48	13	166.07
Q8K382	DENN domain-containing protein 1A [OS=Mus musculus]	Dennd1a	Dennd1a	0.542368	-0.0194508	-0.0812339	-0.168248	0.0447	0.7909	0.46	0.2982	0.745218	0.686643	1	0.837396	0.726415	0.716687	9	6	8	6	25.19
Q8R2N0	Thyroid transcription factor 1-associated protein 26 [OS=Mus musculus]	Ccdc59	Ccdc59	0.542333	-0.161802	0.031468	0.232631	0.0448	0.2012	0.7821	0.0956	0.769725	0.686659	1	0.655098	0.671844	0.600567	3	1	1	1	2.76
Q5XIJ1	embryonic stem cell-specific 5-hydroxymethylcytosine-binding protein [OS=Rattus norvegicus]	LOC500251; Hmces	LOC500251	0.54221	-0.0247012	-0.139529	0.208636	0.0451	0.7502	0.2477	0.1228	0.80999	0.686718	1	0.700929	0.756451	0.74361	7	2	2	2	6.4
Q3KR73	KAT8 regulatory NSL complex subunit 3 [OS=Rattus norvegicus]	Kansl3	Kansl3	0.542139	-0.136384	-0.137276	0.00308978	0.0452	0.2571	0.2539	0.8988	0.802644	0.686752	1	0.800927	0.755308	0.687177	7	4	22	4	52.08
Q8R0L9	Transcriptional adapter 3 [OS=Mus musculus]	Tada3	Tada3	0.540974	0.0461352	-0.080757	0.271423	0.0455	0.7418	0.4618	0.0612	0.82936	0.687307	1	0.687126	0.726877	0.750497	12	5	6	5	15.14
P85118	Probable N-acetyltransferase CML2 [OS=Rattus norvegicus]	Cml2; LOC100910829	Cml2	0.540461	-0.0699156	-0.0786754	-0.0469735	0.0458	0.4897	0.471	0.8072	0.819115	0.687551	1	0.846224	0.726087	0.691739	7	4	10	4	26.21
Q63041	Alpha-1-macroglobulin [OS=Rattus norvegicus]	Pzp	Pzp	0.539583	0.117696	0.0699243	0.0470609	0.0461	0.3458	0.5222	0.6378	0.678187	0.68797	1	0.656421	0.655421	0.711132	2	3	12	3	41.13
Q8K0W9	DPH3 homolog [OS=Mus musculus]	Dph3	Dph3	0.539369	-0.349469	-0.151559	-0.251717	0.0463	0.0483	0.2179	0.1505	0.669827	0.688072	1	0.797511	0.764289	0.59987	20	1	1	1	3.08
Q5I034	uncharacterized protein C12orf43 homolog [OS=Rattus norvegicus]	RGD1311899	RGD1311899	0.538492	-0.05605	-0.0888526	-0.26378	0.0466	0.5572	0.4236	0.1356	0.720101	0.68849	1	0.864568	0.732226	0.704324	59	17	98	17	393.58
Q8K013	GTP-binding protein 10 [OS=Mus musculus]	Gtpbp10	Gtpbp10	0.538356	-0.170133	-0.160023	0.127059	0.0468	0.1861	0.1979	0.2923	0.791172	0.688555	1	0.724473	0.769326	0.683747	9	3	4	2	10.63
P09634	Homeobox protein Hox-A7 [OS=Rattus norvegicus]	Hoxa9; Hoxa7	Hoxa9	0.537993	-0.0449931	-0.468893	-0.21099	0.0469	0.6222	0.0194	0.2117	0.745575	0.688729	1	0.86299	0.953233	0.923963	8	1	2	1	6.91
Q9EPV8	ubiquitin-like protein 5 [OS=Mus musculus]	Ubl5	Ubl5	0.537353	-0.132436	-0.00214252	0.17103	0.047	0.2683	0.9655	0.1861	0.723767	0.689034	1	0.642856	0.690058	0.629533	51	5	12	5	33.86
Q64LC9	RNA-binding protein 4B [OS=Rattus norvegicus]	Rbm4b	Rbm4b	0.536092	0.0821459	-0.017004	0.106509	0.0473	0.5131	0.8568	0.3604	0.796781	0.689636	1	0.740077	0.697813	0.738699	61	18	58	4	211.16
Q9D5K4-1	S100P-binding protein [OS=Mus musculus]	S100pbp	S100pbp	0.53564	-0.0156785	-0.109613	-0.131964	0.0474	0.816	0.3418	0.4058	0.750152	0.689852	1	0.822005	0.744309	0.736264	6	2	3	2	10.9
O54879	High mobility group protein B3 [OS=Mus musculus]	Hmgb3	Hmgb3	0.53424	-0.0591663	-0.0262796	0.354567	0.0479	0.5415	0.792	0.0258	0.773799	0.690522	1	0.605192	0.703216	0.67496	37	8	34	6	108.72
Q6P1G2	Lysine-specific demethylase 2B [OS=Mus musculus]	Kdm2b	Kdm2b	0.531749	-0.239331	0.05906	0.0995673	0.0483	0.1032	0.5874	0.3826	0.734411	0.691716	1	0.685435	0.66397	0.562475	7	9	15	9	38.82
Q9QXV0	ProSAAS [OS=Mus musculus]	Pcsk1n	Pcsk1n	0.529864	-0.0302676	0.132104	0.0541077	0.0486	0.7121	0.2457	0.5983	0.746553	0.69262	1	0.719073	0.632016	0.618894	32	7	48	7	171.29
Q9JMC1	Phosphatidylinositol 4,5-bisphosphate 5-phosphatase A [OS=Rattus norvegicus]	Inpp5j	Inpp5j	0.527647	-0.101399	-0.0304309	-0.0975026	0.0492	0.3593	0.7612	0.5407	0.696282	0.693685	1	0.744965	0.708473	0.660387	12	8	35	8	75.82
Q99KX1	Myeloid leukemia factor 2 [OS=Mus musculus]	Mlf2	Mlf2	0.527294	0.169885	0.09199	-0.0304009	0.0494	0.1891	0.4033	0.9084	0.643304	0.693855	1	0.657004	0.650994	0.732348	40	8	18	8	58.74
Q63364	E3 ubiquitin-protein ligase Praja-2 [OS=Rattus norvegicus]	Pja2	Pja2	0.526835	0.30006	0.158496	0.157345	0.0495	0.0473	0.1731	0.2145	0.725449	0.694076	1	0.650491	0.621863	0.765636	21	9	21	8	90.15
Q811C2	Cysteine protease ATG4C [OS=Mus musculus]	Atg4c	Atg4c	0.526488	-0.192901	0.0773104	-0.269084	0.0497	0.1549	0.4777	0.1309	0.669359	0.694243	1	0.806606	0.658019	0.575665	2	1	1	1	3.68
Q80WE4	Kinesin-like protein KIF20B [OS=Mus musculus]	Kif20b	Kif20b	0.525111	-0.0418819	0.087461	0.173237	0.0499	0.6392	0.4263	0.1811	0.780133	0.694905	1	0.691861	0.65403	0.635316	14	21	33	21	97.53
Q8R2R6	Mitochondrial ribosome-associated GTPase 1 [OS=Mus musculus]	Mtg1	Mtg1	-0.530742	0.197159	-0.0296214	0.40128	0.0484	0.1404	0.7668	0.0175	0.994998	0.85454	0.591511	0.753399	0.872266	1	3	1	1	1	4.27
Q99J25	rRNA methyltransferase 1, mitochondrial [OS=Mus musculus]	Mrm1	Mrm1	-0.65985	0.0139512	-0.138901	0.301411	0.0299	0.9742	0.2492	0.0455	1	0.853276	0.540076	0.811459	0.939514	0.948643	3	1	1	1	3.62
Q9CQL6	39S ribosomal protein L35, mitochondrial [OS=Mus musculus]	Mrpl35	Mrpl35	0.813873	0.220273	-0.295811	-0.0996962	0.0086	0.1065	0.0568	0.5312	0.651612	0.568853	1	0.698234	0.698309	0.813498	4	1	4	1	7.61
Q99N91	39S ribosomal protein L34, mitochondrial [OS=Mus musculus]	Mrpl34	Mrpl34	0.733633	-0.25336	-0.159476	0.0367569	0.0128	0.0928	0.1993	0.6982	0.715162	0.601387	1	0.697171	0.671678	0.563498	11	1	1	1	2.82
O08600	endonuclease G, mitochondrial [OS=Mus musculus]	Endog	Endog	0.663782	0.424153	-0.0239862	-0.0179395	0.0189	0.0116	0.8051	0.9788	0.646514	0.631221	1	0.654603	0.641804	0.861162	11	3	5	3	13.28
Q99KB8	Hydroxyacylglutathione hydrolase, mitochondrial [OS=Mus musculus]	Hagh	Hagh	0.628836	0.0183006	-0.0477656	0.132474	0.0225	0.9444	0.6463	0.2756	0.714977	0.646698	1	0.652249	0.668468	0.677001	33	9	46	2	147.31
P0DJE0	Protein PET100 homolog, mitochondrial [OS=Mus musculus]	2900053A13Rik; Pet100	Pet100	0.622891	0.117696	-0.265688	-0.0693068	0.0236	0.3459	0.073	0.6872	0.725441	0.649368	1	0.761142	0.780677	0.847035	26	2	2	2	0
Q5XFW2	Mitochondrial mRNA pseudouridine synthase TRUB2 [OS=Rattus norvegicus]	Trub2	Trub2	0.620965	-0.106798	-0.239177	-0.242727	0.0239	0.3417	0.0914	0.1621	0.68267	0.650236	1	0.807753	0.767486	0.712723	2	1	1	1	2.57
Q8CIW5	Twinkle protein, mitochondrial [OS=Mus musculus]	Peo1; Twnk	Peo1	0.617749	-0.255471	-0.134166	-0.108093	0.0243	0.0917	0.2632	0.4968	0.723908	0.651687	1	0.78023	0.715199	0.599132	1	1	1	1	2.88
Q9Z2I0	mitochondrial proton/calcium exchanger protein [OS=Mus musculus]	Letm1	Letm1	0.616536	-0.169481	-0.19048	-0.139376	0.0246	0.1874	0.1446	0.3794	0.715112	0.652235	1	0.787645	0.744294	0.661798	40	27	143	1	569.99
B0K035	Mitochondrial fission regulator 2 [OS=Rattus norvegicus]	LOC100911069; Mtfr2	Mtfr2	0.610254	0.281267	0.262952	0.236689	0.0257	0.0566	0.0487	0.0906	0.613702	0.655081	1	0.520843	0.545933	0.663451	8	2	4	2	2.28
Q91ZW1	Transcription factor A, mitochondrial [OS=Rattus norvegicus]	Tfam	Tfam	0.601847	0.13345	-0.133212	0.222332	0.028	0.2909	0.2654	0.1066	0.821292	0.65891	1	0.703994	0.722648	0.792682	50	15	89	15	264.85
Q9D1I5	Methylmalonyl-CoA epimerase, mitochondrial [OS=Mus musculus]	Mcee	Mcee	0.574269	0.0165344	-0.0258502	-0.00487799	0.0338	0.9572	0.7942	0.9457	0.690011	0.671626	1	0.692348	0.683769	0.691651	19	3	6	3	18.58
D3ZY68	Glutamyl-tRNA(Gln) amidotransferase subunit C, mitochondrial [OS=Rattus norvegicus]	Gatc	Gatc	0.568672	0.168059	-0.10987	-0.238597	0.0363	0.1932	0.3404	0.1681	0.703137	0.674237	1	0.829593	0.72759	0.817481	57	5	12	5	54.17
Q9CQN3	Mitochondrial import receptor subunit TOM6 homolog [OS=Mus musculus]	Tomm6	Tomm6	0.566987	0.0592746	-0.0321949	0.212641	0.0371	0.6501	0.7487	0.1177	0.800875	0.675025	1	0.69112	0.690258	0.719209	32	2	5	2	11.26
P11960	2-oxoisovalerate dehydrogenase subunit alpha, mitochondrial [OS=Rattus norvegicus]	Bckdha	Bckdha	0.536479	-0.0256689	-0.0444355	-0.108534	0.0472	0.744	0.673	0.4949	0.688043	0.689452	1	0.741802	0.711017	0.698479	62	20	45	20	173.09
P49134	Integrin beta-1 [OS=Rattus norvegicus]	Itgb1	Itgb1	-0.518214	-0.27715	-0.0853936	0.121843	0.0498	0.0783	0.4381	0.3076	1	0.919812	0.642246	0.919013	0.9759	0.805331	38	24	84	1	307.09
B2RZ37	Receptor expression-enhancing protein 5 [OS=Rattus norvegicus]	Reep5	Reep5	-0.524314	0.327622	0.182164	0.0370929	0.0491	0.0328	0.127	0.6963	0.876163	0.904093	0.628606	0.853923	0.796849	1	24	5	25	2	80.56
Q91WG5	5'-AMP-activated protein kinase subunit gamma-2 [OS=Mus musculus]	Prkag2	Prkag2	-0.526839	0.134386	-0.153517	0.179969	0.0488	0.2874	0.212	0.1677	0.952238	0.819092	0.56851	0.840561	0.911057	1	4	3	8	1	23.58
Q8BXJ2-1	Transcriptional-regulating factor 1 [OS=Mus musculus]	Trerf1	Trerf1	-0.527233	0.0479944	-0.167545	-0.0134738	0.0487	0.7266	0.1819	0.9943	0.83038	0.861224	0.59759	0.838172	0.96728	1	10	6	28	5	104.78
O08962	Potassium voltage-gated channel subfamily H member 2 [OS=Rattus norvegicus]	Kcnh2	Kcnh2	-0.533825	0.0413387	0.0195839	0.381216	0.048	0.7792	0.8668	0.0204	1	0.890771	0.615275	0.76779	0.878761	0.904305	6	4	5	4	16.39
Q8K215	LYR motif-containing protein 4 [OS=Mus musculus]	Lyrm4	Lyrm4	-0.537902	-0.0875367	-0.0239388	0.407856	0.0477	0.4141	0.8057	0.0157	1	0.84974	0.585277	0.753743	0.863958	0.813095	16	2	2	2	6.33
Q4FZF3	Probable ATP-dependent RNA helicase ddx49 [OS=Mus musculus]	Ddx49	Ddx49	-0.538654	0.492758	0.029305	-0.00303423	0.0476	0.0051	0.7978	0.935	0.754584	0.725248	0.49927	0.756173	0.710665	1	4	2	2	2	6.28
Q9DBF1-2	Isoform 2 of Alpha-aminoadipic semialdehyde dehydrogenase [OS=Mus musculus]	Aldh7a1	Aldh7a1	-0.545994	0.183611	-0.0244809	0.310944	0.0465	0.1636	0.8028	0.0412	0.955523	0.865681	0.592922	0.770261	0.880496	1	33	12	94	1	340.77
Q61097-1	kinase suppressor of Ras 1 [OS=Mus musculus]	Ksr1	Ksr1	-0.547741	0.172494	-0.0843145	-0.0248274	0.0462	0.1823	0.4448	0.9393	0.860715	0.836937	0.572541	0.875655	0.887307	1	6	4	15	4	38.96
Q8BXA7	PH domain leucine-rich repeat-containing protein phosphatase 2 [OS=Mus musculus]	Phlpp2	Phlpp2	-0.54899	0.237619	0.264434	0.128795	0.0459	0.0886	0.047	0.2855	0.912028	1	0.683498	0.834136	0.832526	0.981585	1	1	1	1	3.37
Q32KJ2	Arylsulfatase K [OS=Rattus norvegicus]	Arsk	Arsk	-0.550094	0.140729	0.253813	-0.0698953	0.0457	0.2673	0.0546	0.685	0.859634	1	0.682976	0.902306	0.838677	0.92461	6	4	4	4	7.93
P52633	Signal transducer and transcription activator 6 [OS=Mus musculus]	Stat6	Stat6	-0.5527	0.161106	0.0659458	-0.108316	0.0454	0.209	0.5465	0.4954	0.796066	0.936169	0.638226	0.858135	0.894339	1	5	5	6	5	17.42
P07808	Pro-neuropeptide Y [OS=Rattus norvegicus]	Npy; LOC100912228	Npy	-0.553744	0.0328051	0.64963	0.754414	0.045	0.8393	0.0028	0.0011	0.962513	1	0.68125	0.570565	0.637444	0.652104	30	4	5	4	14.42
Q5FVF9	Biotinidase [OS=Rattus norvegicus]	Btd	Btd	-0.55642	0.150799	0.325732	0.189138	0.0441	0.2372	0.0258	0.1514	1	0.993258	0.675403	0.87713	0.792515	0.879837	5	2	2	2	7.71
P97865	peroxisomal targeting signal 2 receptor [OS=Mus musculus]	Pex7	Pex7	-0.558041	0.215385	0.24462	-0.054325	0.0439	0.112	0.0592	0.7659	0.914283	1	0.679224	0.949367	0.844038	0.97994	5	1	1	1	3.99
Q8R104-1	NAD-dependent protein deacetylase sirtuin-3 [OS=Mus musculus]	Sirt3	Sirt3	-0.561346	0.198127	0.110827	-0.0737849	0.043	0.1383	0.3183	0.6654	0.906191	0.941283	0.637879	0.953742	0.871682	1	3	1	1	1	3.95
Q00558	Factor VIII intron 22 protein [OS=Mus musculus]	F8a	F8a	-0.561726	0.270317	0.257475	0.115316	0.0429	0.0646	0.0523	0.3297	0.899502	0.991138	0.671488	0.830402	0.829137	1	4	1	1	1	6.24
Q8R0A2	Zinc finger and BTB domain-containing protein 44 [OS=Mus musculus]	Zbtb44	Zbtb44	-0.569108	-0.0127906	0.0401001	-0.0649175	0.0421	0.836	0.721	0.7105	0.934632	1	0.674034	0.977648	0.972587	0.964003	6	2	7	2	21.13
Q62433	Protein NDRG1 [OS=Mus musculus]	Ndrg1	Ndrg1	-0.580106	-0.204936	-0.129851	-0.0326299	0.0407	0.1393	0.2738	0.8938	0.925178	0.913926	0.611338	0.946341	1	0.867577	66	20	204	1	751.17
O88587-1	Catechol O-methyltransferase [OS=Mus musculus]	Comt	Comt	-0.580371	0.181752	0.0840641	0.284052	0.0406	0.1669	0.444	0.0539	0.938937	0.93453	0.625006	0.771131	0.881632	1	41	9	110	1	377.61
Q9D6Y9	1,4-alpha-glucan-branching enzyme [OS=Mus musculus]	Gbe1	Gbe1	-0.580549	0.127015	0.115876	-0.0331792	0.0404	0.3131	0.299	0.8895	0.896999	0.992309	0.663567	0.917867	0.915724	1	23	10	15	10	49.73
Q3UHK8	Trinucleotide repeat-containing gene 6A protein [OS=Mus musculus]	Tnrc6a	Tnrc6a	-0.5838	0.312532	-0.102643	-0.201998	0.0403	0.0404	0.3657	0.2279	0.755564	0.749929	0.500355	0.869118	0.805227	1	2	3	3	2	8.19
Q9DAR7	M7GpppX diphosphatase [OS=Mus musculus]	Dcps	Dcps	-0.585312	-0.13509	-0.0406327	0.0428326	0.04	0.2614	0.6949	0.6651	1	0.865486	0.576851	0.970747	0.890209	0.810636	52	20	107	1	354.78
Q5SSI6	U3 small nucleolar RNA-associated protein 18 homolog [OS=Mus musculus]	Utp18	Utp18	-0.587485	0.0507591	0.0253931	0.200664	0.0399	0.7092	0.8263	0.132	0.9263	0.982571	0.653903	0.806021	0.965428	1	4	2	5	2	20.52
Q8BHA3-1	putative D-tyrosyl-tRNA(Tyr) deacylase 2 [OS=Mus musculus]	6530401N04Rik; Dtd2	6530401N04Rik	-0.590681	0.191307	0.0937273	0.030398	0.0392	0.1498	0.3948	0.731	0.813441	0.934599	0.620602	0.796481	0.875812	1	14	2	2	2	5.42
Q8R0V5	indoleamine 2,3-dioxygenase 2 [OS=Mus musculus]	Ido2	Ido2	-0.593678	-0.14459	-0.0794549	-0.0164672	0.0386	0.2385	0.4676	0.9863	0.988651	0.942746	0.624712	1	0.996124	0.90113	2	1	4	1	9.14
Q9CW46	Ribonucleoprotein PTB-binding 1 [OS=Mus musculus]	Raver1; Raver1-fdx1l; Gm38431	Raver1	-0.596607	0.044023	-0.136727	-0.00582118	0.0382	0.757	0.2556	0.9506	0.959744	0.882244	0.583435	0.963624	0.969946	1	39	15	54	1	234.64
Q9Z172-1	Small ubiquitin-related modifier 3 [OS=Mus musculus]	Sumo3	Sumo3	-0.612061	-0.0391756	0.189275	0.0763977	0.0361	0.6557	0.1164	0.4834	0.913885	1	0.654261	0.86675	0.877046	0.853551	29	4	45	1	142.31
P48004-2	Isoform RC6-IS of Proteasome subunit alpha type-7 [OS=Rattus norvegicus]	Psma7	Psma7	-0.6291	-0.172487	-0.170187	0.0870241	0.0331	0.1818	0.177	0.435	0.981391	0.888728	0.574633	0.923944	1	0.887312	73	21	156	2	509.14
P07323	Gamma-enolase [OS=Rattus norvegicus]	Eno2; LOC100911625	Eno2	-0.629499	-0.00660161	-0.107571	-0.11909	0.033	0.876	0.3483	0.4495	0.883571	0.928149	0.599956	0.959602	1	0.995435	80	25	618	3	2604.28
Q05175	Brain acid soluble protein 1 [OS=Rattus norvegicus]	Basp1	Basp1	-0.638944	-0.413156	-0.179485	-0.320969	0.0321	0.0298	0.1617	0.0881	0.800532	0.808712	0.519341	1	0.91585	0.687784	75	15	373	9	1356.62
Q9CQK1	Zinc finger HIT domain-containing protein 3 [OS=Mus musculus]	Znhit3	Znhit3	-0.643422	0.0971253	0.267927	-0.0370185	0.0314	0.439	0.0458	0.868	0.83998	1	0.640193	0.861812	0.830512	0.888349	8	1	2	1	2.6
P38647	Stress-70 protein, mitochondrial [OS=Mus musculus]	Hspa9	Hspa9	-0.633232	-0.0557771	-0.0649042	-0.0898387	0.0327	0.5593	0.5436	0.5785	0.939628	0.939936	0.606005	1	0.983188	0.945901	67	46	1070	1	3952.62
Q9DB98	Leukocyte receptor cluster member 1 homolog [OS=Mus musculus]	Leng1	Leng1	-0.671467	0.120554	0.206748	-0.15506	0.0291	0.3353	0.095	0.3357	0.884268	1	0.627868	0.984604	0.866488	0.942005	3	1	1	1	2.97
Q8C208-1	Zinc finger protein Eos [OS=Mus musculus]	Ikzf4	Ikzf4	-0.677052	0.223433	0.1611	-0.107675	0.029	0.103	0.1676	0.4979	0.879316	0.957714	0.598995	0.947454	0.856525	1	19	6	22	6	43.03
O88737	Protein bassoon [OS=Mus musculus]	Bsn	Bsn	-0.688554	0.290545	0.16054	0.103849	0.0281	0.051	0.1691	0.369	0.934889	0.913828	0.567008	0.869958	0.817593	1	9	26	120	3	411.78
Q3U3I9	Zinc finger protein 865 [OS=Mus musculus]	Zfp865	Zfp865	-0.697378	0.228414	0.0535189	0.125952	0.0279	0.0982	0.6261	0.2945	0.855582	0.885832	0.546286	0.784055	0.853573	1	3	3	3	3	9.74
Q9ET20	Secretory carrier-associated membrane protein 4 [OS=Rattus norvegicus]	Scamp4	Scamp4	-0.704239	-0.0677792	0.00433968	-0.0277708	0.0266	0.5004	0.9837	0.9228	0.926007	1	0.613766	0.944005	0.996996	0.95124	5	1	5	1	19.05
Q8BGQ7	Alanine--tRNA ligase, cytoplasmic [OS=Mus musculus]	Aars	Aars	-0.712584	0.190699	-0.0616835	0.0662145	0.0254	0.1512	0.5585	0.5314	0.945532	0.839509	0.51229	0.903117	0.876181	1	43	33	153	1	563.72
Q924W6	Tripartite motif-containing protein 66 [OS=Mus musculus]	Trim66	Trim66	-0.713032	0.0952009	0.0409652	-0.131051	0.0252	0.4466	0.7149	0.4081	0.913166	0.930655	0.567734	1	0.904601	0.966307	3	2	2	2	7.11
Q9WTP2	Protein sprouty homolog 4 [OS=Mus musculus]	Spry4	Spry4	-0.728509	0.329995	0.00890539	0.100438	0.0244	0.0321	0.9466	0.3803	0.869809	0.800465	0.483103	0.811314	0.795539	1	5	1	1	1	3.42
P08644-2	Isoform 2B of GTPase KRas [OS=Rattus norvegicus]	Kras	Kras	-0.750509	0.00386572	-0.0287889	0.302051	0.0228	0.9534	0.7727	0.0451	1	0.886575	0.526975	0.811098	0.904445	0.906871	70	10	51	1	203.14
Q80X73	Protein pelota homolog [OS=Mus musculus]	Pelo	Pelo	-0.885136	0.755294	-0.385053	-0.667901	0.0178	0.0007	0.0316	0.012	0.445323	0.45365	0.245623	0.707511	0.592426	1	36	14	30	14	114
Q61072	disintegrin and metalloproteinase domain-containing protein 9 [OS=Mus musculus]	Adam9	Adam9	-0.911521	0.331719	-0.0370852	-0.129236	0.0167	0.0314	0.7182	0.4134	0.7916	0.774424	0.411703	0.865784	0.794589	1	2	1	1	1	3.45
Q5SQF8	Histone deacetylase complex subunit SAP30L [OS=Mus musculus]	Sap30l	Sap30l	-0.933933	-0.0100956	-0.0521588	0.256841	0.0154	0.8527	0.6189	0.0712	1	0.955054	0.499903	0.836919	0.990215	0.98331	5	1	2	1	2.86
P08082-2	Isoform Non-brain of Clathrin light chain B [OS=Rattus norvegicus]	Cltb	Cltb	-0.985287	-0.13313	0.0704783	-0.227063	0.0146	0.2668	0.5181	0.1858	0.854372	0.985007	0.497552	1	0.938044	0.855356	35	11	154	1	449
O35874	neutral amino acid transporter A [OS=Mus musculus]	Slc1a4	Slc1a4	-0.98784	0.195048	-0.0584542	0.137283	0.0142	0.1433	0.5778	0.2643	0.927933	0.838858	0.422979	0.843704	0.873544	1	5	3	7	3	20.33

## Sheet: S3-Phosphoproteome
Annotated Sequence	Modifications	Qvality PEP	Qvality q-value	# Protein Groups	# Proteins	# Isoforms	# PSMs	Master Protein Accessions	Positions in Master Proteins	Modifications in Master Proteins	# Missed Cleavages	Theo. MH+ [Da]	Accession	Description	Gene symbols	Log2 ratio: DMT1 KD/ Scrambled	Log2 ratio: (+IL-1b) DMT1 KD/ Scrambled	Log2 ratio: Scrambled/Scrambled+ IL-1b	Log2 ratio: Control/ Control+ IL-1b	Adjusted p-value: DMT1 KD/ Scrambled	Adjusted p-value: (+IL-1b) DMT1 KD/ Scrambled	Adjusted p-value:: Scrambled/Scrambled+ IL-1b	Adjusted p-value:: Control/ Control+ IL-1b	Control	Scrambled	DMT1 KD	Control +IL-1b	Scrambled +IL-1b	DMT1 KD +IL-1b	Percolator q-Value (by Search Engine): Sequest HT	Percolator PEP (by Search Engine): Sequest HT	XCorr (by Search Engine): Sequest HT
[K].GNAEGSSDEEGKLVIDEPAK.[E]	2xTMT6plex [K12; K20]; 1xTMT6plex [N-Term]; 2xPhospho [S6(100); S7(100)]	2.2682e-05	7.97536e-05	1	1	1	1	Q8VHK7	Q8VHK7 [127-146]	Q8VHK7 2xPhospho [S132(100); S133(100)]	1	2892.39	Q8VHK7	hepatoma-derived growth factor [OS=Rattus norvegicus]	Hdgf	3.17638	-0.245753	-0.319231	-0.382503	0.0001	0.4284	0.3407	0.2481	0.124213	0.110615	1	0.161925	0.13801	0.116394	1.072e-05	1.69e-06	6.29
[K].TSFDENDSEELEDKDSK.[S]	2xTMT6plex [K14; K17]; 1xTMT6plex [N-Term]; 1xPhospho [S8(100)]	3.42038e-06	7.97536e-05	1	2	1	2	B2GUV7	B2GUV7 [107-123]	B2GUV7 1xPhospho [S114(100)]	1	2755.28	B2GUV7	Eukaryotic translation initiation factor 5B [OS=Rattus norvegicus]	Eif5b	2.8022	-0.162995	0.252733	0.00182539	0.0002	0.6408	0.055	0.6056	0.140312	0.143369	1	0.140135	0.12033	0.107475	1.072e-05	1.656e-07	3.89
[K].DKDISPSVTK.[K]	2xTMT6plex [K2; K10]; 1xTMT6plex [N-Term]; 1xPhospho [S5(100)]	0.0897156	0.00636892	1	1	1	1	Q8CCI5	Q8CCI5 [95-104]	Q8CCI5 1xPhospho [S99(100)]	1	1857.03	Q8CCI5	RING1 and YY1-binding protein [OS=Mus musculus]	Rybp	2.29504	0.0181954	0.0235413	-0.000921207	0.0003	0.7309	0.4169	0.6163	0.243221	0.203763	1	0.243376	0.200465	0.203009	0.002095	0.02515	1.7
[K].KLEKEEEEGISQESSEEEQ.[-]	2xTMT6plex [K1; K4]; 1xTMT6plex [N-Term]; 3xPhospho [S11(100); S14(100); S15(100)]	0.00069318	7.97536e-05	1	4	1	1	Q8K585	Q8K585 [89-107]	Q8K585 3xPhospho [S99(100); S102(100); S103(100)]	2	3164.38	Q8K585	High mobility group protein HMG-I/HMG-Y [OS=Rattus norvegicus]	Hmga1	2.10674	-0.413962	-0.185819	-0.117682	0.0004	0.1749	0.7425	0.9447	0.257442	0.232171	1	0.279322	0.264085	0.198212	1.072e-05	0.0001163	3.15
[K].APRGDVTAEEAAGASPAK.[A]	1xTMT6plex [K18]; 1xTMT6plex [N-Term]; 1xPhospho [S15(100)]	0.00013947	7.97536e-05	2	2	1	1	Q9EPH2; P28667	Q9EPH2 [8-25]; P28667 [8-25]	Q9EPH2 1xPhospho [S22(100)]; P28667 1xPhospho [S22(100)]	1	2236.14	Q9EPH2	MARCKS-related protein [OS=Rattus norvegicus]	LOC100911158; LOC100911122; Marcksl1	1.98532	-0.213241	-0.521531	-0.46097	0.0005	0.5029	0.0975	0.1566	0.311012	0.252557	1	0.428097	0.362539	0.312725	1.072e-05	1.568e-05	3.3
[K].REFDRHSGSDR.[S]	1xTMT6plex [N-Term]; 1xPhospho [S7(100)]	0.0653646	0.00522331	2	6	1	1	Q6AXS5-2; Q6AXS5	Q6AXS5-2 [191-201]; Q6AXS5 [191-201]	Q6AXS5-2 1xPhospho [S197(100)]; Q6AXS5 1xPhospho [S197(100)]	2	1670.76	Q6AXS5-2	Isoform 2 of Plasminogen activator inhibitor 1 RNA-binding protein [OS=Rattus norvegicus]	Serbp1	1.92789	0.550585	-0.195048	0.127728	0.0006	0.011	0.707	0.2509	0.310214	0.262813	1	0.28393	0.300859	0.440661	0.002155	0.02941	3.51
[K].KEEEKDDEGEAETEEEVK.[E]	3xTMT6plex [K1; K5; K18]; 1xTMT6plex [N-Term]; 1xPhospho [T13(100)]	2.64397e-08	7.97536e-05	1	1	1	1	B4F777	B4F777 [193-210]	B4F777 1xPhospho [T205(100)]	2	3119.53	B4F777	High mobility group nucleosome-binding domain-containing protein 5 [OS=Rattus norvegicus]	Hmgn5; Hmgn5b; Nsbp1_predicted	1.89248	0.234064	-0.569722	-0.172727	0.0007	0.1728	0.0732	0.7482	0.327251	0.269344	1	0.368873	0.39977	0.470187	1.072e-05	4.292e-10	5.78
[K].EPSEVPTPK.[R]	1xTMT6plex [K9]; 1xTMT6plex [N-Term]; 1xPhospho [T7(100)]	0.00366257	0.000710363	1	4	1	3	Q8K585	Q8K585 [47-55]	Q8K585 1xPhospho [T53(100)]	0	1521.8	Q8K585	High mobility group protein HMG-I/HMG-Y [OS=Rattus norvegicus]	Hmga1	1.84599	0.208496	-0.0179496	-0.300094	0.0008	0.212	0.5714	0.3944	0.282639	0.278165	1	0.347992	0.281648	0.325439	0.000135	0.00101	2.44
[K].SKSQEEPKDTFEHDPSESIDEFNK.[S]	3xTMT6plex [K2; K8; K24]; 1xTMT6plex [N-Term]; 1xPhospho [S3(100)]	0.000188587	7.97536e-05	1	3	1	1	Q8K019-1	Q8K019-1 [181-204]	Q8K019-1 1xPhospho [S183(100)]	2	3819.88	Q8K019-1	Bcl-2-associated transcription factor 1 [OS=Mus musculus]	Bclaf1	1.71973	0.207883	0.261782	0.3711	0.0009	0.2133	0.05	0.0271	0.335266	0.303605	1	0.259225	0.253224	0.292471	1.072e-05	2.283e-05	4.7
[K].AEPASPDSPKGSSETETEPPVTLASGPAPAR.[C]	1xTMT6plex [K10]; 1xTMT6plex [N-Term]; 3xPhospho [S5(99.9); S/T]	2.35472e-05	7.97536e-05	1	1	1	2	Q5QJV7	Q5QJV7 [15-45]	Q5QJV7 3xPhospho [S19(99.9); S/T]	1	3731.69	Q5QJV7	Steroid hormone receptor ERR1 [OS=Rattus norvegicus]	Esrra	1.68963	-0.0686011	-0.136426	-0.386189	0.001	0.9514	0.9421	0.243	0.30195	0.310006	1	0.39463	0.340752	0.324928	1.072e-05	1.763e-06	3.85
[K].EEEKDDEGEAETEEEVK.[E]	2xTMT6plex [K4; K17]; 1xTMT6plex [N-Term]; 1xPhospho [T12(100)]	2.21574e-05	7.97536e-05	1	1	1	2	B4F777	B4F777 [194-210]	B4F777 1xPhospho [T205(100)]	1	2762.27	B4F777	High mobility group nucleosome-binding domain-containing protein 5 [OS=Rattus norvegicus]	Hmgn5; Hmgn5b; Nsbp1_predicted	1.61051	0.198605	-0.276831	-0.228228	0.0011	0.2297	0.4396	0.5764	0.342684	0.327482	1	0.401419	0.396755	0.455311	1.072e-05	1.642e-06	3.41
[R].ASQSPVR.[A]	1xTMT6plex [N-Term]; 1xPhospho [S2(100)]	0.131482	0.00957627	1	2	1	1	P34821-1	P34821-1 [251-257]	P34821-1 1xPhospho [S252(100)]	0	1053.53	P34821-1	Bone morphogenetic protein 8A [OS=Mus musculus]	Bmp8a	1.58178	1.30654	0.0658416	0.116615	0.0012	0.0001	0.3004	0.2743	0.367854	0.334069	1	0.33929	0.319166	0.78945	0.002947	0.03642	2.01
[K].TDRGTDDSPK.[N]	1xTMT6plex [K10]; 1xTMT6plex [N-Term]; 1xPhospho [S8(100)]	0.0873038	0.0065116	1	2	1	2	Q8R0A5	Q8R0A5 [113-122]	Q8R0A5 1xPhospho [S120(100)]	1	1629.79	Q8R0A5	transcription elongation factor A protein-like 3 [OS=Mus musculus]	Tceal3	1.53292	-0.401539	-0.318129	-0.338623	0.0012	0.187	0.3433	0.317	0.425486	0.345578	1	0.538048	0.430836	0.326165	0.002738	0.04092	2.19
[K].QPSVSPGTALVGSQK.[E]	1xTMT6plex [K15]; 1xTMT6plex [N-Term]; 1xPhospho [S5(98.8)]	0.00229526	0.000525785	1	1	1	1	Q8K585	Q8K585 [32-46]	Q8K585 1xPhospho [S36(98.8)]	0	1994.07	Q8K585	High mobility group protein HMG-I/HMG-Y [OS=Rattus norvegicus]	Hmga1	1.53043	0.0327654	-0.113981	-0.230432	0.0013	0.6816	0.9658	0.57	0.349401	0.346173	1	0.409912	0.374632	0.383238	8.648e-05	0.0005584	2.33
[K].IGSLDNITHVPGGGNKK.[I]	2xTMT6plex [K16; K17]; 1xTMT6plex [N-Term]; 1xPhospho [S3(100)]	0.00155695	0.000403121	3	14	1	4	P19332-1; P19332-6; P19332-3	P19332-1 [665-681]; P19332-6 [287-303]; P19332-3 [316-332]	P19332-1 1xPhospho [S667(100)]; P19332-6 1xPhospho [S289(100)]; P19332-3 1xPhospho [S318(100)]	1	2474.37	P19332-1	Microtubule-associated protein tau [OS=Rattus norvegicus]	Mapt	1.49792	0.333499	-0.0857292	0.0880554	0.0014	0.0696	0.8415	0.3419	0.38498	0.354064	1	0.362185	0.375742	0.473459	6.241e-05	0.0003358	2.93
[K].AADITTPK.[A]	1xTMT6plex [K8]; 1xTMT6plex [N-Term]; 1xPhospho [T6(100)]	0.0150115	0.00128835	1	2	2	6	Q812D1-1	Q812D1-1 [136-143]	Q812D1-1 1xPhospho [T141(100)]	0	1354.74	Q812D1-1	PC4 and SFRS1-interacting protein [OS=Rattus norvegicus]	Psip1	1.47707	0.350256	0.274192	0.763042	0.0015	0.0596	0.0426	0.0008	0.443693	0.359217	1	0.261447	0.297042	0.378665	0.0004989	0.004741	2.68
[R].GMDGASENSSAGKSPK.[A]	2xTMT6plex [K13; K16]; 1xTMT6plex [N-Term]; 1xPhospho [S14(100)]	0.00100336	7.97536e-05	1	1	1	1	Q5M947	Q5M947 [216-231]	Q5M947 1xPhospho [S229(100)]	1	2290.14	Q5M947	RRP15-like protein [OS=Rattus norvegicus]	Rrp15	1.45442	-0.316986	-0.374011	0.0839561	0.0016	0.2939	0.2441	0.3527	0.445615	0.364903	1	0.420423	0.472896	0.379615	1.072e-05	0.000188	2.75
[K].KHPDASVNFSEFSK.[K]	2xTMT6plex [K1; K14]; 1xTMT6plex [N-Term]; 1xPhospho [S6(100)]	3.00335e-05	7.97536e-05	1	1	1	2	P63159	P63159 [30-43]	P63159 1xPhospho [S35(100)]	1	2360.23	P63159	High mobility group protein B1 [OS=Rattus norvegicus]	Hmgb1; Hmg1l1	1.44561	-0.4908	-0.297852	-0.0930555	0.0017	0.1176	0.3867	0.9575	0.411954	0.367137	1	0.439401	0.451326	0.321178	1.072e-05	2.379e-06	4.78
[K].AKASGAAK.[K]	2xTMT6plex [K2; K8]; 1xTMT6plex [N-Term]; 1xPhospho [S4(100)]	0.0850838	0.00613323	1	2	1	1	P43275	P43275 [126-133]	P43275 1xPhospho [S129(100)]	1	1470.86	P43275	Histone H1.1 [OS=Mus musculus]	Hist1h1a	1.41367	0.372918	0.152083	0.20552	0.0018	0.0491	0.1429	0.1278	0.409074	0.375356	1	0.35476	0.337801	0.437442	0.002005	0.02391	1.7
[K].ENSAAPSPIRPHSTSPAKEEQK.[S]	2xTMT6plex [K18; K22]; 1xTMT6plex [N-Term]; 4xPhospho [S3(100); S7(100); S/T]	0.0144338	0.00128835	1	1	1	1	Q920Q0	Q920Q0 [110-131]	Q920Q0 4xPhospho [S112(100); S116(100); S/T]	1	3368.53	Q920Q0	Paralemmin-1 [OS=Rattus norvegicus]	Palm	1.39913	0.248873	-0.178679	-0.0659641	0.0019	0.1513	0.7707	0.8501	0.386558	0.379159	1	0.404642	0.42915	0.509949	0.0004918	0.004574	2.3
[R].SHSPSSPERNNK.[S]	1xTMT6plex [K12]; 1xTMT6plex [N-Term]; 1xPhospho [S]	0.0081945	0.00104516	1	3	1	1	Q8BTI8	Q8BTI8 [1453-1464]		1	1877.93	Q8BTI8	serine/arginine repetitive matrix protein 2 [OS=Mus musculus]	Srrm2	1.39845	0.378373	0.117545	0.164722	0.002	0.0459	0.1956	0.1842	0.441785	0.379337	1	0.394117	0.349656	0.454509	0.0003191	0.002557	2.05
[K].ALFKPPEDSQDDESDSDAEEEQTTKR.[R]	2xTMT6plex [K4; K25]; 1xTMT6plex [N-Term]; 2xPhospho [S14(100); S16(100)]	0.00103875	7.97536e-05	1	1	1	1	Q8BKT7	Q8BKT7 [299-324]	Q8BKT7 2xPhospho [S312(100); S314(100)]	1	3814.72	Q8BKT7	THO complex subunit 5 homolog [OS=Mus musculus]	Thoc5	1.39373	-0.305739	0.148518	0.178058	0.0021	0.3132	0.1485	0.1632	0.391134	0.380581	1	0.345721	0.343351	0.27778	1.072e-05	0.0001966	2.81
[K].EKTPSPKEEDEEAESPPEK.[K]	3xTMT6plex [K2; K7; K19]; 1xTMT6plex [N-Term]; 2xPhospho [T3(100); S5(100)]	0.118057	0.00902484	1	2	1	1	Q9EPJ0	Q9EPJ0 [200-218]	Q9EPJ0 2xPhospho [T202(100); S204(100)]	2	3232.57	Q9EPJ0	Nuclear ubiquitous casein and cyclin-dependent kinase substrate 1 [OS=Rattus norvegicus]	Nucks1	1.37308	-0.388979	-0.803497	-1.05153	0.0022	0.2006	0.0233	0.0111	0.390655	0.386066	1	0.809724	0.673811	0.514569	0.00378	0.05867	4.14
[R].AMEGIPTQDSQPEDRSPELSRR.[R]	1xOxidation [M2]; 1xTMT6plex [N-Term]; 1xPhospho [S20(98.8)]	0.0015309	0.000322997	1	1	1	1	Q99MM4	Q99MM4 [400-421]	Q99MM4 1xPhospho [S419(98.8)]	2	2824.31	Q99MM4	TRAF-type zinc finger domain-containing protein 1 [OS=Rattus norvegicus]	Trafd1	1.35577	0.167664	-0.11245	-0.151615	0.0023	0.2913	0.9593	0.8196	0.428241	0.390725	1	0.475695	0.422398	0.474454	5.222e-05	0.0003274	2.89
[R].SGDKPTRTPSK.[S]	2xTMT6plex [K4; K11]; 1xTMT6plex [N-Term]; 1xPhospho [T/S]	0.0208445	0.00178361	1	1	3	3	O35964	O35964 [291-301]		1	1941.08	O35964	Endophilin-A2 [OS=Rattus norvegicus]	Sh3gl1	1.35547	0.271188	-0.0361431	0.149598	0.0024	0.1246	0.6381	0.2095	0.456921	0.390809	1	0.411915	0.400723	0.483593	0.0006981	0.006537	2
[R].RTPQPVSIKPPPSEVVSRGSS.[-]	1xTMT6plex [K9]; 1xTMT6plex [N-Term]; 1xPhospho [S/T]	6.61728e-05	7.97536e-05	1	1	1	1	Q8K3X0	Q8K3X0 [679-699]		2	2743.49	Q8K3X0	Protein CASC3 [OS=Rattus norvegicus]	Casc3	1.32117	0.251889	-0.22599	-0.0358725	0.0025	0.1476	0.5999	0.7392	0.487134	0.400209	1	0.499399	0.468077	0.55737	1.072e-05	6.269e-06	4.43
[K].ENSGTGSTVR.[K]	1xTMT6plex [N-Term]; 1xPhospho [S/T]	0.017403	0.00145239	1	1	1	1	P0C6C0	P0C6C0 [965-974]		0	1316.6	P0C6C0	A-kinase anchor protein SPHKAP [OS=Rattus norvegicus]	Sphkap	1.31695	0.052479	-0.668921	-1.16846	0.0026	0.6179	0.0433	0.0077	0.353752	0.401384	1	0.795133	0.638153	0.661794	0.0005672	0.005475	2.37
[R].AQPLEDLDGFQELFQTPAGANDSVTVEESAK.[M]	1xTMT6plex [K31]; 1xTMT6plex [N-Term]; 1xPhospho [T/S]	1.54995e-08	7.97536e-05	1	1	1	5	E9PVX6	E9PVX6 [1320-1350]		0	3844.86	E9PVX6	Proliferation marker protein Ki-67 [OS=Mus musculus]	Mki67	1.31318	0.2885	-0.18556	0.207298	0.0027	0.1085	0.7433	0.1253	0.502044	0.402433	1	0.434849	0.45767	0.558985	1.072e-05	2.23e-10	5.6
[K].EDNSEGEEILEEVGGDPEEEDDHHMEFCR.[V]	1xCarbamidomethyl [C28]; 1xOxidation [M25]; 1xTMT6plex [N-Term]; 1xPhospho [S4(100)]	2.18694e-07	7.97536e-05	1	1	1	6	Q6PDQ2	Q6PDQ2 [418-446]	Q6PDQ2 1xPhospho [S421(100)]	0	3757.46	Q6PDQ2	Chromodomain-helicase-DNA-binding protein 4 [OS=Mus musculus]	Chd4	1.31155	0.441396	-0.879712	-0.789114	0.0028	0.0273	0.0157	0.0307	0.465407	0.400227	0.993396	0.804229	0.736422	1	1.072e-05	5.72e-09	5.95
[K].DCKEEENKSSSEGGDAGNDTR.[N]	1xCarbamidomethyl [C2]; 2xTMT6plex [K3; K8]; 1xTMT6plex [N-Term]; 3xPhospho [S9(100); S10(100); S11(97.2)]	0.00206483	0.00046153	1	3	1	1	Q923W4	Q923W4 [169-189]	Q923W4 3xPhospho [S177(100); S178(100); S179(97.2)]	2	3212.31	Q923W4	Hepatoma-derived growth factor-related protein 3 [OS=Rattus norvegicus]	Hdgfrp3; Hdgfl3	1.30331	-0.882261	0.0917718	0.157965	0.0029	0.0207	0.2433	0.1944	0.439258	0.405197	1	0.393702	0.380224	0.206278	6.971e-05	0.0004857	3.36
[R].GTDDSPKNSQEDLQDR.[H]	1xTMT6plex [K7]; 1xTMT6plex [N-Term]; 1xPhospho [S9(100)]	3.50467e-05	7.97536e-05	1	2	2	5	Q8R0A5	Q8R0A5 [116-131]	Q8R0A5 1xPhospho [S124(100)]	1	2343.09	Q8R0A5	transcription elongation factor A protein-like 3 [OS=Mus musculus]	Tceal3	1.27655	-0.498384	-0.482031	-0.456219	0.003	0.1128	0.125	0.1613	0.373983	0.412783	1	0.513082	0.576537	0.40813	1.072e-05	2.871e-06	3.19
[R].RPLSPGK.[D]	1xTMT6plex [K7]; 1xTMT6plex [N-Term]; 1xPhospho [S4(100)]	0.0576393	0.00447911	1	2	1	9	Q00900	Q00900 [2106-2112]	Q00900 1xPhospho [S2109(100)]	0	1292.75	Q00900	Human immunodeficiency virus type I enhancer-binding protein 2 homolog [OS=Rattus norvegicus]	Hivep2	1.26589	-0.12395	-1.27852	-0.940772	0.0031	0.7579	0.0044	0.0161	0.475508	0.412217	0.991285	0.912765	1	0.917671	0.001579	0.01669	1.91
[R].SVSSGSGTLVSTV.[-]	1xTMT6plex [N-Term]; 1xPhospho [S6(99.9)]	0.0791034	0.00579816	1	3	1	1	Q6GMN2-2	Q6GMN2-2 [510-522]	Q6GMN2-2 1xPhospho [S515(99.9)]	0	1489.73	Q6GMN2-2	Isoform 2 of Brain-specific angiogenesis inhibitor 1-associated protein 2 [OS=Rattus norvegicus]	Baiap2	1.26348	-0.26227	-0.575121	-0.491887	0.0032	0.3932	0.0714	0.1326	0.499053	0.416537	1	0.70181	0.620559	0.517406	0.001949	0.02241	2.14
[K].IETQTQEEVRDSK.[E]	1xTMT6plex [K13]; 1xTMT6plex [N-Term]; 1xPhospho [S12(100)]	0.000336329	7.11143e-05	1	2	1	10	P10362	P10362 [259-271]	P10362 1xPhospho [S270(100)]	1	2101.06	P10362	Secretogranin-2 [OS=Rattus norvegicus]	Scg2	1.25137	-0.243961	-0.46673	-0.223305	0.0033	0.4321	0.1391	0.5896	0.514995	0.420049	1	0.601207	0.580497	0.490186	5.646e-05	0.0001887	5.84
[K].QAQDPDPRSPTLGIARTPMK.[I]	1xTMT6plex [K20]; 1xTMT6plex [N-Term]; 2xPhospho [S9(100); T]	0.00751966	0.000992769	1	3	1	2	Q68FW2	Q68FW2 [59-78]	Q68FW2 2xPhospho [S67(100); T]	2	2797.39	Q68FW2	Cell division cycle-associated protein 3 [OS=Rattus norvegicus]	Cdca3	1.24536	0.296371	0.0858976	-0.15097	0.0034	0.1017	0.2555	0.822	0.438213	0.421801	1	0.486555	0.39742	0.488053	0.0002823	0.002332	3.31
[R].VPALASPAGSLPDHVR.[R]	1xTMT6plex [N-Term]; 1xPhospho [S6(100)]	0.00012827	7.97536e-05	1	9	1	1	Q9Z330-1	Q9Z330-1 [10-25]	Q9Z330-1 1xPhospho [S15(100)]	0	1895.99	Q9Z330-1	DNA (cytosine-5)-methyltransferase 1 [OS=Rattus norvegicus]	Dnmt1	1.24463	-0.255778	0.0958284	0.0920771	0.0035	0.4053	0.2363	0.3315	0.496974	0.422016	1	0.466247	0.394895	0.330738	1.072e-05	1.42e-05	3.37
[K].VVDYSQFQESDDADEDYGRDSGPPAK.[K]	1xTMT6plex [K26]; 1xTMT6plex [N-Term]; 2xPhospho [S10(100); S21(100)]	2.97959e-09	7.97536e-05	1	2	1	3	Q9EPJ0	Q9EPJ0 [10-35]	Q9EPJ0 2xPhospho [S19(100); S30(100)]	1	3508.49	Q9EPJ0	Nuclear ubiquitous casein and cyclin-dependent kinase substrate 1 [OS=Rattus norvegicus]	Nucks1	1.22971	0.0675622	-0.256171	-0.301314	0.0035	0.566	0.5002	0.3924	0.496285	0.426404	1	0.611555	0.509256	0.533672	1.072e-05	2.966e-11	7.51
[K].ADTTTPTTSAITASRSESPPPLSEPK.[Q]	1xTMT6plex [K26]; 1xTMT6plex [N-Term]; 1xPhospho [T/S]	0.00252051	0.000525785	1	2	1	1	Q8K2F0	Q8K2F0 [245-270]		1	3180.61	Q8K2F0	bromodomain-containing protein 3 [OS=Mus musculus]	Brd3	1.22795	0.0710203	-0.206272	-0.106968	0.0036	0.5534	0.6686	0.9871	0.489078	0.426924	1	0.526719	0.492544	0.517397	8.648e-05	0.0006298	2.71
[K].SGERSGYSSPGSPGTPGSR.[S]	1xTMT6plex [N-Term]; 2xPhospho [S8(98.3); S9(98.3)]	9.95051e-06	7.97536e-05	3	14	2	2	P19332-1; P19332-6; P19332-3	P19332-1 [502-520]; P19332-6 [124-142]; P19332-3 [153-171]	P19332-1 2xPhospho [S509(98.3); S510(98.3)]; P19332-6 2xPhospho [S131(98.3); S132(98.3)]; P19332-3 2xPhospho [S160(98.3); S161(98.3)]	1	2211.93	P19332-1	Microtubule-associated protein tau [OS=Rattus norvegicus]	Mapt	1.22771	0.132953	-0.503044	-0.312559	0.0037	0.3727	0.1101	0.3663	0.466939	0.426994	1	0.579895	0.605137	0.663554	1.072e-05	6.148e-07	5.12
[R].QRLFSQGQDVSDK.[V]	1xTMT6plex [K13]; 1xTMT6plex [N-Term]; 1xPhospho [S5(100)]	0.00645073	0.000874552	1	3	1	1	O35889-1	O35889-1 [1800-1812]	O35889-1 1xPhospho [S1804(100)]	1	2046.04	O35889-1	Afadin [OS=Rattus norvegicus]	Mllt4; Afdn	1.21064	-0.155791	-0.218103	-0.0853816	0.0038	0.6613	0.6256	0.9228	0.429985	0.432078	1	0.4562	0.502595	0.451149	0.0002535	0.001965	2.06
[K].AEDGAAPSPSSETPKK.[K]	2xTMT6plex [K15; K16]; 1xTMT6plex [N-Term]; 2xPhospho [S8(100); T13(100)]	0.0201924	0.00207142	2	2	2	6	P26645; P30009	P26645 [131-146]; P30009 [131-146]	P26645 2xPhospho [S138(100); T143(100)]; P30009 2xPhospho [S138(100); T143(100)]	1	2419.18	P26645	Myristoylated alanine-rich C-kinase substrate [OS=Mus musculus]	Marcks	1.20451	0.330759	-0.226195	-0.217832	0.0039	0.0708	0.5988	0.606	0.517073	0.433917	1	0.601348	0.507573	0.638362	0.0007398	0.007768	1.86
[R].YSSVSNIYSDHR.[Y]	1xTMT6plex [N-Term]; 1xPhospho [S3(99.4)]	0.000981808	7.97536e-05	1	2	2	5	O88737	O88737 [2066-2077]	O88737 1xPhospho [S2068(99.4)]	0	1736.78	O88737	Protein bassoon [OS=Mus musculus]	Bsn	1.20049	-0.0901339	-0.291582	-0.0912106	0.004	0.8751	0.4011	0.9499	0.525659	0.435127	1	0.559966	0.532588	0.500332	1.072e-05	0.0001827	3.74
[K].EAASPVVQEASPELSPEERR.[V]	1xTMT6plex [N-Term]; 1xPhospho [S4(100)]	0.000283161	7.97536e-05	1	1	2	2	Q5I0E3	Q5I0E3 [38-57]	Q5I0E3 1xPhospho [S41(100)]	1	2490.21	Q5I0E3	uncharacterized protein C7orf50 homolog [OS=Rattus norvegicus]	LOC498154	1.19204	-0.221129	-0.164722	-0.108518	0.0041	0.4851	0.8237	0.981	0.48522	0.437682	1	0.523125	0.49062	0.4209	1.072e-05	3.774e-05	2.39
[R].TSSIATALNTSGAGGSRPAQAVRASNPDLR.[R]	1xTMT6plex [N-Term]; 1xPhospho [S/T]	0.00175185	0.00046153	1	2	1	1	Q9JM52	Q9JM52 [675-704]		1	3235.64	Q9JM52	Misshapen-like kinase 1 [OS=Mus musculus]	Mink1	1.18441	-0.548559	-0.37772	-0.14329	0.0042	0.0872	0.239	0.848	0.499951	0.440005	1	0.552157	0.571692	0.390868	6.971e-05	0.0003915	2.21
[K].TGASEAVPSEGKGELEHSQQEEDGEEAMAGPPQGLFPGGK.[G]	1xOxidation [M28]; 2xTMT6plex [K12; K40]; 1xTMT6plex [N-Term]; 2xPhospho [S4(100); S18(100)]	1.62042e-07	7.97536e-05	1	1	2	9	P10354	P10354 [295-334]	P10354 2xPhospho [S298(100); S312(100)]	1	4901.25	P10354	Chromogranin-A [OS=Rattus norvegicus]	Chga	1.18315	-0.309342	-0.64372	-0.465354	0.0043	0.3079	0.0517	0.1528	0.532086	0.440389	1	0.734628	0.688043	0.555257	1.072e-05	3.948e-09	7.33
[R].TRSWESSSPVDRPELEAASPTTR.[S]	1xTMT6plex [N-Term]; 1xPhospho [S3(97.4)]	0.0137005	0.00136356	1	2	1	1	Q80YV2	Q80YV2 [351-373]	Q80YV2 1xPhospho [S353(97.4)]	1	2868.37	Q80YV2	Nuclear-interacting partner of ALK [OS=Mus musculus]	Zc3hc1	1.17862	-0.25323	-0.0241556	0.00175103	0.0044	0.411	0.5934	0.6061	0.460377	0.441773	1	0.459818	0.449232	0.376912	0.000491	0.004797	3.32
[R].HRSTSPSPSRLK.[E]	1xTMT6plex [K12]; 1xTMT6plex [N-Term]; 3xPhospho [S3(98.6); S5(98.6); S7(98.6)]	0.126424	0.00925296	1	2	2	2	Q8K194-1	Q8K194-1 [57-68]	Q8K194-1 3xPhospho [S59(98.6); S61(98.6); S63(98.6)]	2	2050.96	Q8K194-1	U4/U6.U5 small nuclear ribonucleoprotein 27 kDa protein [OS=Mus musculus]	Snrnp27	1.16393	-0.465734	-0.457899	-0.256005	0.0045	0.1342	0.1471	0.5014	0.556207	0.446295	1	0.664205	0.613004	0.443877	0.002841	0.03502	1.84
[K].QSFTMVADTPENLR.[L]	1xTMT6plex [N-Term]; 1xPhospho [T9(100)]	4.74939e-05	7.97536e-05	1	2	1	3	Q99MZ8	Q99MZ8 [60-73]	Q99MZ8 1xPhospho [T68(100)]	0	1917.9	Q99MZ8	LIM and SH3 domain protein 1 [OS=Rattus norvegicus]	Lasp1	1.15735	-0.203907	-0.506647	-0.0823153	0.0046	0.5251	0.1074	0.9114	0.552868	0.448336	1	0.58533	0.63697	0.553015	1.072e-05	4.166e-06	3.51
[K].SGHAWSGTVNQEDKSPTWGEPQKPK.[S]	3xTMT6plex [K14; K23; K25]; 1xTMT6plex [N-Term]; 1xPhospho [S15(96.1)]	0.0106897	0.00120429	1	1	1	1	Q3UHC0	Q3UHC0 [554-578]	Q3UHC0 1xPhospho [S568(96.1)]	1	3747.93	Q3UHC0	Trinucleotide repeat-containing gene 6C protein [OS=Mus musculus]	Tnrc6c	1.14702	-0.00491202	-0.532308	-0.302973	0.0047	0.8151	0.0913	0.3876	0.548664	0.451556	1	0.676879	0.653059	0.650839	0.0004042	0.003373	2.36
[R].GSGGGQGSTNYGK.[S]	1xTMT6plex [K13]; 1xTMT6plex [N-Term]; 1xPhospho [S2(100)]	0.000364083	7.11143e-05	1	1	1	3	Q99020	Q99020 [259-271]	Q99020 1xPhospho [S260(100)]	0	1707.81	Q99020	Heterogeneous nuclear ribonucleoprotein A/B [OS=Mus musculus]	Hnrnpab	1.14677	0.469365	0.0801591	0.314928	0.0048	0.02	0.2679	0.0459	0.496794	0.451637	1	0.399369	0.427227	0.591496	5.781e-05	0.0001991	5.14
[R].QDTSRMSTSQNSIPFEHHGK.[-]	1xTMT6plex [K20]; 1xTMT6plex [N-Term]; 3xPhospho [S7(97.4); S9(97.6); S12(99.9)]	0.00254213	0.000525785	1	1	1	1	Q9DC28-2	Q9DC28-2 [390-409]	Q9DC28-2 3xPhospho [S396(97.4); S398(97.6); S401(99.9)]	1	2985.28	Q9DC28-2	isoform 2 of casein kinase i isoform delta [OS=Mus musculus]	Csnk1d	1.14204	-0.103804	-0.0333096	-0.0477673	0.0049	0.8263	0.6277	0.7833	0.547865	0.453117	1	0.566309	0.463701	0.431509	8.648e-05	0.000637	3.35
[R].NYQQNYQNSESGEK.[N]	1xTMT6plex [K14]; 1xTMT6plex [N-Term]; 2xPhospho [S9(100); S11(100)]	1.24001e-05	7.97536e-05	1	1	1	1	P62960	P62960 [155-168]	P62960 2xPhospho [S163(100); S165(100)]	0	2306.97	P62960	Nuclease-sensitive element-binding protein 1 [OS=Mus musculus]	Ybx1	1.14015	-0.112964	-0.50746	-0.156162	0.005	0.7962	0.1066	0.8029	0.563896	0.453712	1	0.628359	0.644972	0.596397	1.072e-05	8.056e-07	4.1
[K].LSSNCSGVEGDVTDEDEGAEMSQR.[M]	1xCarbamidomethyl [C5]; 1xOxidation [M21]; 1xTMT6plex [N-Term]; 1xPhospho [T13(100)]	9.08615e-09	7.97536e-05	1	1	1	6	Q8K394	Q8K394 [573-596]	Q8K394 1xPhospho [T585(100)]	0	2897.17	Q8K394	inactive phospholipase C-like protein 2 [OS=Mus musculus]	Plcl2	1.14008	-0.27158	-0.409384	-0.427983	0.0051	0.3724	0.1974	0.1902	0.466195	0.453736	1	0.627196	0.602615	0.499213	1.072e-05	1.16e-10	4.44
[K].HDSGAADLER.[V]	1xTMT6plex [N-Term]; 1xPhospho [S3(100)]	0.000639591	7.97536e-05	1	2	1	5	Q9CR41-1	Q9CR41-1 [36-45]	Q9CR41-1 1xPhospho [S38(100)]	0	1379.62	Q9CR41-1	Huntingtin-interacting protein K [OS=Mus musculus]	2310003F16Rik; Hypk	1.13804	-0.282452	-0.760359	-0.666461	0.0052	0.3526	0.0276	0.053	0.492642	0.454376	1	0.781909	0.769672	0.632819	1.072e-05	0.0001053	2.98
[K].QDAGFGSPQR.[Q]	1xTMT6plex [N-Term]; 1xPhospho [S7(100)]	0.000715138	7.97536e-05	1	1	1	5	Q5XIB5	Q5XIB5 [75-84]	Q5XIB5 1xPhospho [S81(100)]	0	1371.63	Q5XIB5	Coiled-coil domain-containing protein 86 [OS=Rattus norvegicus]	Ccdc86	1.13761	0.101322	-0.196428	-0.326834	0.0053	0.4633	0.7017	0.3397	0.442518	0.454512	1	0.555032	0.520807	0.558698	1.072e-05	0.000121	3.46
[K].DSTSQHDDDNISTTSGFSSR.[A]	1xTMT6plex [N-Term]; 1xPhospho [S/T]	2.67183e-05	7.97536e-05	1	1	2	6	P49791	P49791 [172-191]		0	2466.03	P49791	Nuclear pore complex protein Nup153 [OS=Rattus norvegicus]	Nup153	1.12552	-0.670007	-0.837451	-0.506845	0.0054	0.048	0.0199	0.1219	0.520923	0.458336	1	0.740199	0.818996	0.514742	1.072e-05	2.066e-06	3.29
[K].ALVPTPGKK.[G]	2xTMT6plex [K8; K9]; 1xTMT6plex [N-Term]; 1xPhospho [T5(100)]	0.0450436	0.00328791	1	2	1	2	P13383	P13383 [117-125]	P13383 1xPhospho [T121(100)]	1	1678.03	P13383	Nucleolin [OS=Rattus norvegicus]	Ncl	1.12459	0.622948	0.398427	0.278672	0.0055	0.0048	0.0118	0.0628	0.445368	0.458633	1	0.367139	0.347958	0.535862	0.001281	0.01331	2.21
[R].GSGGFGSTGKN.[-]	1xTMT6plex [K10]; 1xTMT6plex [N-Term]; 1xPhospho [S7(100)]	0.0260033	0.00232722	1	1	2	2	P70583	P70583 [195-205]	P70583 1xPhospho [S201(100)]	1	1506.74	P70583	Deoxyuridine 5'-triphosphate nucleotidohydrolase [OS=Rattus norvegicus]	Dut	1.12151	0.378889	-0.209218	0.195247	0.0056	0.0455	0.6581	0.1394	0.557344	0.459613	1	0.486798	0.531341	0.690924	0.0008724	0.00804	1.53
[R].GTDDSPKNSQEDLQDR.[H]	1xTMT6plex [K7]; 1xTMT6plex [N-Term]; 2xPhospho [S5(100); S9(100)]	0.0705056	0.0055514	1	2	1	1	Q8R0A5	Q8R0A5 [116-131]	Q8R0A5 2xPhospho [S120(100); S124(100)]	1	2423.05	Q8R0A5	transcription elongation factor A protein-like 3 [OS=Mus musculus]	Tceal3	1.11561	-0.827308	-0.0641051	-0.204189	0.0057	0.0257	0.7531	0.6478	0.449429	0.461497	1	0.51776	0.482466	0.271908	0.00229	0.03217	3.56
[K].GNPDDSFLDDDGEDGNGVTMTEK.[N]	1xTMT6plex [K23]; 1xTMT6plex [N-Term]; 1xPhospho [S6(100)]	0.00281582	0.000270467	1	1	1	1	O35314	O35314 [535-557]	O35314 1xPhospho [S540(100)]	0	2966.27	O35314	Secretogranin-1 [OS=Rattus norvegicus]	Chgb	1.11133	-0.2594	-0.410584	-0.25094	0.0058	0.3981	0.196	0.5145	0.555123	0.462866	1	0.660586	0.615253	0.514004	0.0001619	0.0009488	3.31
[R].RHSHSHSPMSTR.[R]	1xTMT6plex [N-Term]; 1xPhospho [S/T]	0.0178391	0.00178288	1	1	1	2	P62996-1	P62996-1 [93-104]		1	1728.8	P62996-1	transformer-2 protein homolog beta [OS=Mus musculus]	Tra2b	1.09943	-0.455771	-0.511938	-0.256517	0.0059	0.1412	0.1036	0.4997	0.514141	0.4667	1	0.614188	0.665497	0.485228	0.0006399	0.00663	3.01
[K].SVPHFSEEEKEPE.[-]	1xTMT6plex [K10]; 1xTMT6plex [N-Term]; 1xPhospho [S6(100)]	0.00688659	0.00072221	1	1	1	1	P27682	P27682 [198-210]	P27682 1xPhospho [S203(100)]	1	2081.98	P27682	Neuroendocrine protein 7B2 [OS=Rattus norvegicus]	Scg5	1.095	-0.237368	0.110531	-0.0895332	0.0059	0.448	0.2075	0.9417	0.461832	0.468136	1	0.491401	0.433609	0.367827	0.0002882	0.002181	3.12
[K].RQPPSSSEDSDEELQR.[C]	1xTMT6plex [N-Term]; 1xPhospho [S10(100)]	3.32621e-08	7.97536e-05	1	2	1	14	Q5I034	Q5I034 [165-180]	Q5I034 1xPhospho [S174(100)]	1	2168.97	Q5I034	uncharacterized protein C12orf43 homolog [OS=Rattus norvegicus]	RGD1311899	1.08075	0.25422	-0.18817	0.0366495	0.006	0.1447	0.7335	0.4919	0.562774	0.472783	1	0.548657	0.53865	0.642443	1.072e-05	5.67e-10	5.99
[R].QSPDHPTVGAGMLHITENGPTEVDYSPSDIQDSSLSHK.[I]	1xOxidation [M12]; 1xTMT6plex [K38]; 1xTMT6plex [N-Term]; 1xPhospho [S2(100)]	1.13803e-14	7.97536e-05	1	1	2	18	P15205	P15205 [1656-1693]	P15205 1xPhospho [S1657(100)]	0	4601.15	P15205	microtubule-associated protein 1B [OS=Rattus norvegicus]	Map1b	1.06789	-0.0842256	-0.387928	-0.450938	0.0061	0.8966	0.2245	0.1663	0.533136	0.477016	1	0.728759	0.624181	0.588784	1.072e-05	6.816e-18	8.94
[K].HIKEEPLSEEEPCTSTAVPSPEKK.[K]	1xCarbamidomethyl [C13]; 3xTMT6plex [K3; K23; K24]; 1xTMT6plex [N-Term]; 2xPhospho [S8(100); S20(100)]	0.000718328	7.97536e-05	1	2	1	3	Q9QZ86	Q9QZ86 [500-523]	Q9QZ86 2xPhospho [S507(100); S519(100)]	2	3798.91	Q9QZ86	Nucleolar protein 58 [OS=Rattus norvegicus]	Nop58	1.06723	-0.172464	-0.102023	0.150159	0.0062	0.6158	0.9109	0.2085	0.564685	0.477233	1	0.508867	0.512204	0.454491	1.072e-05	0.000122	4.65
[K].RTADSSSSEDEEEYVVEK.[V]	1xTMT6plex [K18]; 1xTMT6plex [N-Term]; 1xPhospho [S/T/Y]	0.0172983	0.0017343	1	1	1	2	Q61686	Q61686 [7-24]		1	2598.19	Q61686	chromobox protein homolog 5 [OS=Mus musculus]	Cbx5	1.06546	-0.523707	-0.28216	0.0352481	0.0063	0.1003	0.4244	0.4969	0.550627	0.477819	1	0.537337	0.581035	0.404158	0.0006302	0.0064	5.05
[K].KDKDDQEWESTSPPKPTVYISGVIAR.[G]	3xTMT6plex [K1; K3; K15]; 1xTMT6plex [N-Term]; 1xPhospho [S10(97.9)]	6.13937e-05	5.91125e-05	1	1	2	4	Q9QX67	Q9QX67 [40-65]	Q9QX67 1xPhospho [S49(97.9)]	2	3943.1	Q9QX67	Death-associated protein 1 [OS=Rattus norvegicus]	Dap	1.06224	-0.274356	-0.253513	-0.0632251	0.0064	0.3677	0.5112	0.8392	0.566769	0.478887	1	0.59216	0.570884	0.472018	5.611e-05	5.633e-05	7.03
[K].TNEDDVNKQSPVRK.[N]	2xTMT6plex [K8; K14]; 1xTMT6plex [N-Term]; 1xPhospho [S10(100)]	0.0219116	0.0021917	1	1	1	3	Q5RKH3	Q5RKH3 [121-134]	Q5RKH3 1xPhospho [S130(100)]	2	2397.27	Q5RKH3	uncharacterized protein KIAA1143 homolog [OS=Rattus norvegicus]	RGD1311745	1.06054	-0.597041	-0.222551	-0.443126	0.0065	0.0668	0.611	0.1757	0.494345	0.479451	1	0.672085	0.559421	0.369838	0.0007968	0.00856	2.83
[K].LYTDDEDDVYK.[T]	1xTMT6plex [K11]; 1xTMT6plex [N-Term]; 1xPhospho [Y10(100)]	0.0236569	0.00234747	1	2	2	3	P10362	P10362 [227-237]	P10362 1xPhospho [Y236(100)]	0	1913.88	P10362	Secretogranin-2 [OS=Rattus norvegicus]	Scg2	1.06001	-0.19182	-0.380054	-0.451671	0.0066	0.5584	0.236	0.1657	0.486592	0.47963	1	0.665475	0.624186	0.546475	0.0008386	0.009401	2.34
[K].ASGYQSSQKK.[S]	2xTMT6plex [K9; K10]; 1xTMT6plex [N-Term]; 1xPhospho [S7(99.1)]	0.00623496	0.000874552	1	2	2	4	Q8VHK7	Q8VHK7 [97-106]	Q8VHK7 1xPhospho [S103(99.1)]	1	1851	Q8VHK7	hepatoma-derived growth factor [OS=Rattus norvegicus]	Hdgf	1.05987	0.169872	-0.177786	-0.0937938	0.0067	0.2861	0.7744	0.9602	0.496418	0.479676	1	0.529764	0.542584	0.610384	0.0002374	0.001898	2.51
[K].LQSADASPR.[R]	1xTMT6plex [N-Term]; 1xPhospho [S7(100)]	0.00420879	0.000769263	1	3	1	1	Q9Z0F1	Q9Z0F1 [175-183]	Q9Z0F1 1xPhospho [S181(100)]	0	1253.61	Q9Z0F1	neuroendocrine secretory protein 55 [OS=Mus musculus]	Gnas	1.05673	-0.195504	0.28587	0.491778	0.0068	0.547	0.0381	0.0085	0.570547	0.480721	1	0.405744	0.39431	0.344338	0.000151	0.0012	2.2
[K].QSPQSASLTFGEGTESPSAQSCQQAK.[E]	1xCarbamidomethyl [C22]; 1xTMT6plex [K26]; 1xTMT6plex [N-Term]; 1xPhospho [S7(100)]	3.53539e-10	7.97536e-05	1	1	5	8	F1LYQ8	F1LYQ8 [388-413]	F1LYQ8 1xPhospho [S394(100)]	0	3249.51	F1LYQ8	FERM, RhoGEF and pleckstrin domain-containing protein 1 [OS=Rattus norvegicus]	Farp1	1.04487	-0.105076	-0.0240624	-0.157137	0.0069	0.8222	0.593	0.7996	0.487416	0.484687	1	0.543505	0.492839	0.45822	1.072e-05	2.174e-12	6.85
[R].QEFDTMEDQAGDYTMLQDQEGDMDHGLK.[EA]	1xTMT6plex [K28]; 1xTMT6plex [N-Term]; 1xPhospho [Y/T]	2.0581e-11	7.97536e-05	3	8	1	3	P19332-1; P19332-6; P19332-3	P19332-1 [6-33]; P19332-6 [6-33]; P19332-3 [6-33]		0	3785.61	P19332-1	Microtubule-associated protein tau [OS=Rattus norvegicus]	Mapt	1.04147	0.283244	-0.0483727	0.119058	0.007	0.1131	0.6871	0.2689	0.595241	0.485834	1	0.548091	0.502399	0.611384	1.072e-05	6.646e-14	5.94
[R].INSTATPDQDREK.[I]	1xTMT6plex [K13]; 1xTMT6plex [N-Term]; 1xPhospho [T6(100)]	0.00141883	0.000243324	2	3	1	1	O54988-1; O08815	O54988-1 [1090-1102]; O08815 [1060-1072]	O54988-1 1xPhospho [T1095(100)]; O08815 1xPhospho [T1065(100)]	1	2013.01	O54988-1	STE20-like serine/threonine-protein kinase [OS=Mus musculus]	Slk	1.03963	0.347571	0.117782	0.439588	0.0071	0.0612	0.1956	0.0136	0.603585	0.486451	1	0.445051	0.448315	0.570443	3.16e-05	0.0002962	2.31
[R].GSGGGQGSTNYGK.[S]	1xTMT6plex [K13]; 1xTMT6plex [N-Term]; 1xPhospho [S2(100)]	7.35833e-07	7.97536e-05	1	1	2	12	Q99020	Q99020 [259-271]	Q99020 1xPhospho [S260(100)]	0	1707.81	Q99020	Heterogeneous nuclear ribonucleoprotein A/B [OS=Mus musculus]	Hnrnpab	1.0364	0.803877	0.23106	0.0179797	0.0072	0.0009	0.0656	0.5524	0.45187	0.487543	1	0.446274	0.415391	0.725184	1.072e-05	2.532e-08	5.18
[K].TSASPPLEKSGDEGSEDEAASGED.[-]	1xTMT6plex [K9]; 1xTMT6plex [N-Term]; 4xPhospho [S4(99.9); S10(100); S15(100); S21(100)]	0.000171091	7.97536e-05	1	1	1	7	Q9EPJ0	Q9EPJ0 [220-243]	Q9EPJ0 4xPhospho [S223(99.9); S229(100); S234(100); S240(100)]	1	3143.17	Q9EPJ0	Nuclear ubiquitous casein and cyclin-dependent kinase substrate 1 [OS=Rattus norvegicus]	Nucks1	1.03576	-0.184881	-0.381354	-0.269655	0.0073	0.5786	0.2344	0.4637	0.573036	0.487759	1	0.690806	0.635337	0.55892	1.072e-05	2.029e-05	5.08
[K].EEHGGLIRSPR.[H]	1xTMT6plex [N-Term]; 1xPhospho [S9(100)]	0.00082682	0.000153226	1	1	1	11	P26369	P26369 [71-81]	P26369 1xPhospho [S79(100)]	1	1559.79	P26369	Splicing factor U2AF 65 kDa subunit [OS=Mus musculus]	U2af2	1.03217	0.116721	-0.397517	-0.13591	0.0074	0.4171	0.2119	0.8757	0.503333	0.488974	1	0.553055	0.644096	0.698372	0.0001064	0.0003646	4.16
[R].GREPGAYPALDSRQEK.[R]	1xTMT6plex [K16]; 1xTMT6plex [N-Term]; 1xPhospho [S12(100)]	0.000350788	7.11143e-05	1	1	1	4	O35314	O35314 [418-433]	O35314 1xPhospho [S429(100)]	2	2312.18	O35314	Secretogranin-1 [OS=Rattus norvegicus]	Chgb	1.02851	-0.192891	-0.483457	-0.443666	0.0075	0.5551	0.1242	0.1753	0.601037	0.490215	1	0.817443	0.685365	0.599592	5.646e-05	0.0001946	4.47
[K].TQVEASEESALNHLQGAGGAEPR.[G]	1xTMT6plex [N-Term]; 1xPhospho [S6(100)]	9.36281e-06	7.97536e-05	1	3	1	1	Q5M820	Q5M820 [69-91]	Q5M820 1xPhospho [S74(100)]	0	2660.25	Q5M820	MORF4 family-associated protein 1 [OS=Rattus norvegicus]	Mrfap1	1.02788	-0.239828	-0.413067	-0.23033	0.0076	0.4406	0.1933	0.5703	0.601174	0.49043	1	0.705239	0.653015	0.553003	1.072e-05	5.7e-07	4.09
[R].GGPGGAGGAGFPREPSPAQAGPGAAK.[G]	1xTMT6plex [K26]; 1xTMT6plex [N-Term]; 1xPhospho [S16(100)]	1.05309e-05	3.88506e-05	1	1	1	5	Q8CF90	Q8CF90 [327-352]	Q8CF90 1xPhospho [S342(100)]	1	2757.39	Q8CF90	Transcription factor MafA [OS=Mus musculus]	Mafa	1.02662	0.30147	0.170582	0.18235	0.0077	0.096	0.1184	0.1562	0.518353	0.49086	1	0.456807	0.436121	0.537476	1.413e-05	1.115e-05	4.86
[K].THPMMSDEEDDDDEEEAAPR.[R]	1xOxidation [M]; 1xTMT6plex [N-Term]; 1xPhospho [S6(100)]	2.16158e-08	7.97536e-05	1	1	2	18	Q4G059	Q4G059 [108-127]	Q4G059 1xPhospho [S113(100)]	0	2643.99	Q4G059	cell division cycle-associated 7-like protein [OS=Rattus norvegicus]	Cdca7l	1.02575	0.0981256	-0.0421085	0.0980646	0.0078	0.472	0.6633	0.3164	0.569495	0.491156	1	0.532071	0.505702	0.541295	1.072e-05	3.35e-10	5.34
[K].EVPSKEEQSPVK.[A]	2xTMT6plex [K5; K12]; 1xTMT6plex [N-Term]; 1xPhospho [S9(100)]	0.015872	0.0015485	1	1	1	2	P15205	P15205 [605-616]	P15205 1xPhospho [S613(100)]	1	2124.16	P15205	microtubule-associated protein 1B [OS=Rattus norvegicus]	Map1b	1.01975	-0.0874717	0.107409	0.255334	0.0079	0.8858	0.2135	0.0785	0.498746	0.493201	1	0.417846	0.457816	0.430883	0.0005599	0.005743	2.73
[R].NLNPSENEASGNDSIKLSAK.[K]	2xTMT6plex [K16; K20]; 1xTMT6plex [N-Term]; 1xPhospho [S18(100)]	0.061954	0.00461728	1	1	2	3	Q4V8G7	Q4V8G7 [101-120]	Q4V8G7 1xPhospho [S118(100)]	1	2855.48	Q4V8G7	Centromere protein U [OS=Rattus norvegicus]	Mlf1ip; Cenpu	1.01527	-0.152576	-0.0673618	0.0282135	0.008	0.671	0.7661	0.5184	0.585397	0.494735	1	0.57406	0.518382	0.466359	0.001658	0.01782	2.24
[R].QDHPSSMGVYGQESGGFSGPGENR.[S]	1xTMT6plex [N-Term]; 1xPhospho [S/Y]	0.0153536	0.00128835	1	1	1	2	Q61545	Q61545 [269-292]		0	2789.18	Q61545	RNA-binding protein EWS [OS=Mus musculus]	Ewsr1	1.01404	-0.377139	-0.0104767	-0.110598	0.0081	0.2132	0.5412	0.9725	0.523546	0.495157	1	0.56526	0.498766	0.384031	0.0005047	0.004848	2.22
[K].LGSTAPQVLNTSSPAQQAENEAK.[A]	1xTMT6plex [K23]; 1xTMT6plex [N-Term]; 1xPhospho [S/T]	5.48291e-05	5.91125e-05	1	3	1	1	O35987	O35987 [260-282]		0	2879.46	O35987	NSFL1 cofactor p47 [OS=Rattus norvegicus]	Nsfl1c	1.01079	-0.0898009	-0.160968	0.0239282	0.0082	0.8766	0.8386	0.5319	0.560319	0.496276	1	0.551103	0.554855	0.52137	5.325e-05	5.125e-05	4.61
[K].VDYESQSTDTQNFSSESK.[R]	1xTMT6plex [K18]; 1xTMT6plex [N-Term]; 2xPhospho [S5(98.5); S14(98.5)]	8.6869e-06	7.97536e-05	1	2	4	6	P15473	P15473 [189-206]	P15473 2xPhospho [S193(98.5); S202(98.5)]	0	2670.13	P15473	Insulin-like growth factor-binding protein 3 [OS=Rattus norvegicus]	Igfbp3	1.00928	0.686918	-0.0228138	0.0996503	0.0082	0.0025	0.5889	0.3126	0.509162	0.496796	1	0.47518	0.504714	0.812509	1.072e-05	5.209e-07	4.58
[K].ALQADSPHSSSGMSEVHSPGEHSGQSQGPPTPPTTPK.[T]	1xTMT6plex [K37]; 1xTMT6plex [N-Term]; 1xPhospho [T31(98.9)]	5.67399e-08	7.97536e-05	1	1	2	2	Q04887	Q04887 [206-242]	Q04887 1xPhospho [T236(98.9)]	0	4245.99	Q04887	transcription factor SOX-9 [OS=Mus musculus]	Sox9	1.00787	-0.447109	0.199184	0.206928	0.0083	0.1465	0.0887	0.1257	0.564412	0.497281	1	0.488996	0.433153	0.317723	1.072e-05	1.094e-09	4.69
[K].SKPIPIMPASPQK.[G]	1xOxidation [M7]; 2xTMT6plex [K2; K13]; 1xTMT6plex [N-Term]; 1xPhospho [S10(100)]	0.000513433	8.90393e-05	3	10	1	2	O35303-4; O35303-2; O35303-5	O35303-4 [619-631]; O35303-2 [587-599]; O35303-5 [615-627]	O35303-4 1xPhospho [S628(100)]; O35303-2 1xPhospho [S596(100)]; O35303-5 1xPhospho [S624(100)]	0	2177.24	O35303-4	Isoform 4 of Dynamin-1-like protein [OS=Rattus norvegicus]	Dnm1l	1.00362	-0.145062	-0.136019	-0.0920402	0.0084	0.6937	0.9433	0.9527	0.601952	0.498748	1	0.641607	0.548058	0.495631	6.605e-05	0.000256	3.27
[K].DTNPEDGVVISEHGEDEMDMESEKEEEKPK.[A]	3xTMT6plex [K24; K28; K30]; 1xTMT6plex [N-Term]; 2xPhospho [S11(100); S22(100)]	0.000149539	7.97536e-05	1	2	1	1	P58501-1	P58501-1 [172-201]	P58501-1 2xPhospho [S182(100); S193(100)]	1	4509.04	P58501-1	PAX3- and PAX7-binding protein 1 [OS=Mus musculus]	Gcfc1; Paxbp1	0.990325	-0.0747555	-0.282101	-0.117027	0.0085	0.9309	0.4247	0.9476	0.57136	0.503365	1	0.619639	0.612073	0.581165	1.072e-05	1.714e-05	4.69
[R].TASEGDGGAAGGAGTAGGRPMSVAGSPLSPGPVRAPLSR.[S]	1xOxidation [M21]; 1xTMT6plex [N-Term]; 1xPhospho [S38(99.9)]	1.60142e-06	7.97536e-05	1	1	1	3	P81122	P81122 [360-398]	P81122 1xPhospho [S397(99.9)]	1	3801.85	P81122	Insulin receptor substrate 2 [OS=Mus musculus]	Irs2	0.989364	-0.0363839	0.0542002	0.306256	0.0086	0.9339	0.3319	0.0504	0.610932	0.5037	1	0.494084	0.485128	0.473046	1.072e-05	6.538e-08	3.89
[K].VLGNPKSDEMNVK.[V]	2xTMT6plex [K6; K13]; 1xTMT6plex [N-Term]; 1xPhospho [S7(100)]	0.000696277	7.97536e-05	1	3	1	1	Q60605	Q60605 [51-63]	Q60605 1xPhospho [S57(100)]	1	2198.19	Q60605	Myosin light polypeptide 6 [OS=Mus musculus]	Myl6	0.988875	0.108439	-0.497372	-0.140877	0.0087	0.4412	0.1135	0.8575	0.624712	0.50387	1	0.688792	0.711284	0.766807	1.072e-05	0.0001172	2.53
[K].EISDDEAEEEKGEK.[E]	2xTMT6plex [K11; K14]; 1xTMT6plex [N-Term]; 1xPhospho [S3(100)]	0.00324247	0.000282499	1	1	1	6	P34058	P34058 [224-237]	P34058 1xPhospho [S226(100)]	1	2375.15	P34058	Heat shock protein HSP 90-beta [OS=Rattus norvegicus]	Hsp90ab1	0.987217	0.526194	0.155755	0.448785	0.0088	0.0132	0.1378	0.0126	0.544328	0.50445	1	0.398807	0.452826	0.652126	0.0001669	0.001071	5.51
[K].QSTETMVSGQTSDKPSRDPETPQSSGSK.[R]	2xTMT6plex [K14; K28]; 1xTMT6plex [N-Term]; 1xPhospho [T21(98)]	2.05773e-07	7.97536e-05	1	1	3	4	Q68FW2	Q68FW2 [163-190]	Q68FW2 1xPhospho [T183(98)]	1	3719.8	Q68FW2	Cell division cycle-associated protein 3 [OS=Rattus norvegicus]	Cdca3	0.979139	0.128528	0.0629462	0.256724	0.0089	0.3857	0.3082	0.0774	0.528936	0.507282	1	0.442712	0.485625	0.530875	1.072e-05	5.3e-09	4.61
[R].VVSHDDSLSPSSSTLSTLELDAAEK.[D]	1xTMT6plex [K25]; 1xTMT6plex [N-Term]; 1xPhospho [S/T]	0.000579406	7.97536e-05	1	1	1	5	P59759	P59759 [529-553]		0	3126.55	P59759	MKL/myocardin-like protein 2 [OS=Mus musculus]	Mkl2	0.974856	0.26684	-0.336345	-0.343299	0.009	0.1304	0.306	0.3086	0.565018	0.508791	1	0.716812	0.642376	0.772887	1.072e-05	9.273e-05	3.61
[K].SHSANDSEEFFREDDGGADLHNATNLR.[S]	1xTMT6plex [N-Term]; 1xPhospho [S3(100)]	0.0351143	0.0031714	1	1	1	1	Q4G008	Q4G008 [322-348]	Q4G008 1xPhospho [S324(100)]	1	3313.43	Q4G008	uncharacterized protein KIAA0930 homolog [OS=Rattus norvegicus]	RGD1304694	0.971017	-0.12395	-0.179176	-0.10187	0.0091	0.758	0.769	0.9917	0.602715	0.510146	1	0.646811	0.577606	0.530053	0.001247	0.01492	4.53
[R].TVSLGAGAKDELHIVEAEAMNYEGSPIK.[V]	2xTMT6plex [K9; K28]; 1xTMT6plex [N-Term]; 1xPhospho [S25(100)]	7.94336e-05	5.91125e-05	1	3	1	1	P13084	P13084 [46-73]	P13084 1xPhospho [S70(100)]	1	3696.92	P13084	Nucleophosmin [OS=Rattus norvegicus]	Npm1	0.970979	0.21328	0.361077	0.581789	0.0092	0.2056	0.0176	0.0039	0.527592	0.51016	1	0.352503	0.397202	0.460484	5.611e-05	6.871e-05	6.85
[K].AAEFPDFYDSEEQMGPHQEAEDEK.[D]	1xTMT6plex [K24]; 1xTMT6plex [N-Term]; 2xPhospho [Y8(100); S10(100)]	6.41587e-05	5.91125e-05	1	1	1	4	O35314	O35314 [615-638]	O35314 2xPhospho [Y622(100); S624(100)]	0	3417.39	O35314	Secretogranin-1 [OS=Rattus norvegicus]	Chgb	0.967862	-0.350441	-0.102068	-0.517739	0.0093	0.2442	0.9113	0.1149	0.466345	0.511263	1	0.66767	0.548744	0.430404	5.611e-05	5.842e-05	5.38
[R].AAKYSETDLDK.[V]	2xTMT6plex [K3; K11]; 1xTMT6plex [N-Term]; 1xPhospho [S5(100)]	0.00759556	0.000992769	1	2	1	1	Q5DTT2-1	Q5DTT2-1 [279-289]	Q5DTT2-1 1xPhospho [S283(100)]	1	2008.06	Q5DTT2-1	PH and SEC7 domain-containing protein 1 [OS=Mus musculus]	Psd	0.965438	0.326174	-0.117791	0.0541383	0.0094	0.0749	0.9815	0.4364	0.591044	0.512123	1	0.569276	0.55569	0.69666	0.0002986	0.002355	2.62
[K].RRSPSPKPTK.[V]	2xTMT6plex [K7; K10]; 1xTMT6plex [N-Term]; 2xPhospho [S3(100); S5(100)]	0.0100838	0.00114947	1	3	2	11	Q6AYK1	Q6AYK1 [153-162]	Q6AYK1 2xPhospho [S155(100); S157(100)]	2	2001.1	Q6AYK1	RNA-binding protein with serine-rich domain 1 [OS=Rattus norvegicus]	Rnps1	-1.84815	-0.299255	0.547364	0.532371	0.0095	0.3238	0.0035	0.0061	1	0.970525	0.269562	0.691418	0.6641	0.539696	0.0003853	0.003171	2.89
[K].QPGFPQPSPSDDPSLSPRQDPAHTAPP.[-]	1xTMT6plex [N-Term]; 1xPhospho [S/T]	0.00135427	0.000161714	1	1	2	4	Q99MC0	Q99MC0 [121-147]		1	3132.46	Q99MC0	Protein phosphatase 1 regulatory subunit 14A [OS=Rattus norvegicus]	Ppp1r14a	0.964282	-0.148198	-0.330225	-0.0838981	0.0096	0.6848	0.3189	0.9185	0.603402	0.512533	1	0.639532	0.644362	0.581457	2.12e-05	0.0002779	2.24
[K].AEKGSEEEEAVPDGPVAEYRR.[E]	1xTMT6plex [K3]; 1xTMT6plex [N-Term]; 1xPhospho [S5(100)]	0.0141152	0.00128835	1	1	1	2	Q5XIB2	Q5XIB2 [339-359]	Q5XIB2 1xPhospho [S343(100)]	2	2856.38	Q5XIB2	Peptidyl-prolyl cis-trans isomerase CWC27 homolog [OS=Rattus norvegicus]	Cwc27	0.963281	-0.109409	-0.212166	-0.138209	0.0097	0.8068	0.647	0.8682	0.587695	0.512889	1	0.646781	0.594144	0.550753	0.0004638	0.004461	3.12
[K].VVGGRENGSDTLPSSPGSGDQTLPDHAPF.[-]	1xTMT6plex [N-Term]; 1xPhospho [S/T]	0.000705649	7.97536e-05	1	1	1	2	Q6PCT3	Q6PCT3 [192-220]		1	3203.48	Q6PCT3	Tumor protein D54 [OS=Rattus norvegicus]	Tpd52l2	0.963204	-0.131896	-0.244632	-0.167206	0.0098	0.7323	0.5395	0.7635	0.633289	0.512917	1	0.711109	0.607699	0.554605	1.072e-05	0.0001189	3.26
[K].HIDDTSQMDLFHRDSDDDQVEEQLDETEAK.[W]	1xOxidation [M8]; 1xTMT6plex [K30]; 1xTMT6plex [N-Term]; 1xPhospho [S15(100)]	1.69402e-06	7.97536e-05	1	1	2	5	Q80YR7	Q80YR7 [1119-1148]	Q80YR7 1xPhospho [S1133(100)]	1	4115.81	Q80YR7	Claspin [OS=Mus musculus]	Clspn	0.957017	0.997437	0.443469	0.176393	0.0099	0.0004	0.0082	0.1651	0.437326	0.515121	1	0.386995	0.378802	0.756259	1.072e-05	7.012e-08	3.84
[R].LGSVTHVTTFSHASPGNR.[G]	1xTMT6plex [N-Term]; 1xPhospho [S/T]	0.00116673	7.97536e-05	1	4	1	1	Q921U8	Q921U8 [519-536]		0	2177.07	Q921U8	Smoothelin [OS=Mus musculus]	Smtn	0.956476	0.0914725	0.00798526	0.224102	0.01	0.4913	0.4709	0.1074	0.606774	0.515314	1	0.519476	0.51247	0.546015	1.072e-05	0.0002281	3.01
[K].VASDTEDTDRATSK.[K]	1xTMT6plex [K14]; 1xTMT6plex [N-Term]; 1xPhospho [S3(100)]	0.022619	0.00222198	1	1	1	1	Q62901	Q62901 [653-666]	Q62901 1xPhospho [S655(100)]	1	2033.98	Q62901	Arginine-glutamic acid dipeptide repeats protein [OS=Rattus norvegicus]	Rere	0.955935	0.238219	0.0906058	-0.043003	0.0101	0.1666	0.2458	0.7624	0.568262	0.515508	1	0.585455	0.484128	0.571046	0.0008167	0.00891	3.53
[K].FFGVISSGK.[K]	1xTMT6plex [K9]; 1xTMT6plex [N-Term]; 1xPhospho [S7(99.4)]	0.0127782	0.00125084	1	2	1	1	P35601-1	P35601-1 [6-14]	P35601-1 1xPhospho [S12(99.4)]	0	1479.8	P35601-1	Replication factor C subunit 1 [OS=Mus musculus]	Rfc1	0.955277	0.0486594	0.00101737	0.319672	0.0102	0.6294	0.4952	0.0434	0.56305	0.515743	1	0.451145	0.515379	0.533058	0.0004524	0.004045	1.51
[K].ANVTPQSSSELRPTTTAALGSGQEAK.[K]	1xTMT6plex [K26]; 1xTMT6plex [N-Term]; 3xPhospho [T4(100); S/T]	5.38807e-05	7.97536e-05	1	3	1	2	Q9QW07-3	Q9QW07-3 [883-908]	Q9QW07-3 3xPhospho [T886(100); S/T]	0	3299.54	Q9QW07-3	Isoform C of 1-phosphatidylinositol 4,5-bisphosphate phosphodiesterase beta-4 [OS=Rattus norvegicus]	Plcb4	0.951567	0.00527659	-0.377508	-0.0920556	0.0103	0.7778	0.2391	0.9528	0.616434	0.51707	1	0.657049	0.671724	0.674186	1.072e-05	4.87e-06	3.85
[K].QQEEEEEEERLSREWEDK.[R]	1xTMT6plex [K18]; 1xTMT6plex [N-Term]; 1xPhospho [S12(100)]	0.000352649	7.11143e-05	1	1	1	11	P10354	P10354 [342-359]	P10354 1xPhospho [S353(100)]	2	2916.33	P10354	Chromogranin-A [OS=Rattus norvegicus]	Chga	0.950326	-0.196397	0.0740594	0.113094	0.0104	0.544	0.281	0.2829	0.618179	0.517516	1	0.57157	0.49162	0.42905	5.646e-05	0.000195	3.14
[K].LQVPTPEEMSNLTPESSPELAKK.[S]	2xTMT6plex [K22; K23]; 1xTMT6plex [N-Term]; 3xPhospho [S16(100); S17(100); S/T]	0.0340882	0.00261652	1	4	1	1	Q69Z98-2	Q69Z98-2 [498-520]	Q69Z98-2 3xPhospho [S513(100); S514(100); S/T]	1	3452.67	Q69Z98-2	Isoform 2 of Serine/threonine-protein kinase BRSK2 [OS=Mus musculus]	Brsk2	0.94743	0.149707	-0.0907123	0.162199	0.0105	0.3328	0.8639	0.1881	0.640817	0.518555	1	0.572674	0.552207	0.612588	0.001092	0.01034	2.16
[K].EFAPSDEELDSYRHGEEWDPQK.[A]	1xTMT6plex [K22]; 1xTMT6plex [N-Term]; 1xPhospho [S5(100)]	0.0208445	0.00178361	1	1	1	2	Q7TNE3	Q7TNE3 [110-131]	Q7TNE3 1xPhospho [S114(100)]	1	3202.44	Q7TNE3	Sperm-associated antigen 7 [OS=Mus musculus]	Spag7	0.946912	0.086758	-0.44303	-0.138233	0.0105	0.5047	0.1615	0.8681	0.625488	0.518742	1	0.688386	0.705207	0.748916	0.000691	0.006522	2.14
[K].AAATPESQEPQAK.[G]	1xTMT6plex [K13]; 1xTMT6plex [N-Term]; 1xPhospho [T4(100)]	0.0124997	0.00123286	1	2	1	2	Q9EPH2	Q9EPH2 [145-157]	Q9EPH2 1xPhospho [T148(100)]	0	1865.94	Q9EPH2	MARCKS-related protein [OS=Rattus norvegicus]	LOC100911158; LOC100911122; Marcksl1	0.942708	-0.876896	-0.437342	-0.683283	0.0106	0.0215	0.1664	0.0488	0.546599	0.520255	1	0.877723	0.704482	0.383617	0.0004533	0.004303	2.69
[K].RGETPTK.[R]	1xTMT6plex [K7]; 1xTMT6plex [N-Term]; 1xPhospho [T4(99.2)]	0.0343018	0.00261652	1	2	1	6	E9PVX6	E9PVX6 [489-495]	E9PVX6 1xPhospho [T492(99.2)]	1	1326.72	E9PVX6	Proliferation marker protein Ki-67 [OS=Mus musculus]	Mki67	0.939942	0.0758114	0.201042	0.391846	0.0107	0.5373	0.0869	0.0217	0.522595	0.521254	1	0.398297	0.45345	0.477916	0.001092	0.01037	2.45
[K].TPEGRASPALGSGPDGSGDSLEMSSLDR.[A]	1xOxidation [M23]; 1xTMT6plex [N-Term]; 1xPhospho [S7(97.6)]	1.25168e-05	7.97536e-05	1	1	2	3	Q75Q39	Q75Q39 [88-115]	Q75Q39 1xPhospho [S94(97.6)]	1	3071.38	Q75Q39	Mitochondrial import receptor subunit TOM70 [OS=Rattus norvegicus]	Tomm70a; Tomm70	0.937615	0.357385	0.197675	0.128214	0.0108	0.056	0.0902	0.2506	0.585237	0.522095	1	0.53547	0.455244	0.583213	1.072e-05	8.128e-07	5.25
[R].GWRPSSREDSVEAR.[GS]	1xTMT6plex [N-Term]; 1xPhospho [S10(100)]	0.0944086	0.00703814	1	2	2	3	P10354	P10354 [408-421]	P10354 1xPhospho [S417(100)]	1	1940.92	P10354	Chromogranin-A [OS=Rattus norvegicus]	Chga	0.935935	-0.170394	0.236391	-0.122327	0.0109	0.6206	0.0624	0.9275	0.460565	0.522704	1	0.501319	0.443705	0.394277	0.002946	0.04465	2.96
[R].VITEEEK.[N]	1xTMT6plex [K7]; 1xTMT6plex [N-Term]; 1xPhospho [T3(100)]	0.0295596	0.0024765	1	1	1	1	P47963	P47963 [168-174]	P47963 1xPhospho [T170(100)]	0	1385.73	P47963	60S ribosomal protein L13 [OS=Mus musculus]	Rpl13	0.935738	-0.418478	-0.751413	-0.493662	0.011	0.1718	0.029	0.1309	0.588468	0.522775	1	0.828572	0.880061	0.658473	0.0009984	0.009039	2.45
[K].RKAEDSDSEPEPEDNVR.[L]	1xTMT6plex [K2]; 1xTMT6plex [N-Term]; 2xPhospho [S6(100); S8(100)]	0.034862	0.00316175	1	2	1	3	Q9DBR1	Q9DBR1 [494-510]	Q9DBR1 2xPhospho [S499(100); S501(100)]	2	2591.14	Q9DBR1	5'-3' exoribonuclease 2 [OS=Mus musculus]	Xrn2	0.934374	-0.219153	-0.101462	-0.086569	0.0111	0.4899	0.909	0.9304	0.649764	0.523269	1	0.689946	0.561395	0.482277	0.001237	0.01486	5.1
[K].SSPAAKPGSTPSRPSSAK.[R]	2xTMT6plex [K6; K18]; 1xTMT6plex [N-Term]; 2xPhospho [S9(92.3); T10(92.3)]	0.00871396	0.00109238	1	1	2	2	Q3B8Q0	Q3B8Q0 [207-224]	Q3B8Q0 2xPhospho [S215(92.3); T216(92.3)]	0	2560.31	Q3B8Q0	Microtubule-associated protein RP/EB family member 2 [OS=Rattus norvegicus]	Mapre2	0.934361	0.126617	0.381161	0.238127	0.0112	0.3912	0.0147	0.0933	0.548991	0.523274	1	0.465459	0.40178	0.438636	0.0003256	0.002724	3.38
[K].QLPAASGPRPASRLSNPQK.[S]	1xTMT6plex [K19]; 1xTMT6plex [N-Term]; 1xPhospho [S]	0.006514	0.000874552	1	1	1	2	P59241	P59241 [72-90]		1	2513.38	P59241	Aurora kinase A [OS=Rattus norvegicus]	Aurka	0.933424	-0.200286	0.0391148	-0.0103111	0.0113	0.5343	0.3721	0.6482	0.624211	0.523614	1	0.628688	0.509609	0.443552	0.0002535	0.001987	2.17
[K].SPMVEQAVQTSSVDNLNAK.[K]	1xTMT6plex [K19]; 1xTMT6plex [N-Term]; 1xPhospho [S/T]	1.38496e-06	7.97536e-05	1	1	1	1	Q8CGC4	Q8CGC4 [154-172]		0	2556.28	Q8CGC4	protein LSM14 homolog B [OS=Mus musculus]	Lsm14b	0.933075	-0.0932896	-0.129628	-0.231098	0.0114	0.863	0.9728	0.5676	0.497434	0.523741	1	0.583853	0.572978	0.5371	1.072e-05	5.467e-08	3.97
[R].RAASVAAATTSPTPR.[T]	1xTMT6plex [N-Term]; 1xPhospho [T/S]	1.63171e-06	7.97536e-05	1	1	3	6	A1L1J6	A1L1J6 [193-207]		1	1765.92	A1L1J6	Zinc finger protein 652 [OS=Rattus norvegicus]	Zfp652	0.931338	-0.421688	-0.0379935	-0.00974712	0.0115	0.1684	0.6459	0.647	0.611822	0.524372	1	0.61597	0.538365	0.401916	1.072e-05	6.707e-08	4.76
[K].DSFSQESSPSSPSDLAK.[L]	1xTMT6plex [K17]; 1xTMT6plex [N-Term]; 1xPhospho [S11(99)]	2.56455e-07	7.97536e-05	2	5	2	9	Q9QYX7-1; Q9JKS6	Q9QYX7-1 [1331-1347]; Q9JKS6 [1343-1359]	Q9QYX7-1 1xPhospho [S1341(99)]; Q9JKS6 1xPhospho [S1353(99)]	0	2307.08	Q9QYX7-1	Protein piccolo [OS=Mus musculus]	Pclo	0.930699	0.0383981	-0.365839	-0.314628	0.0116	0.6628	0.2561	0.3625	0.577959	0.524604	1	0.718802	0.676021	0.694255	1.072e-05	6.946e-09	4.81
[R].SSSASSPPKK.[E]	2xTMT6plex [K9; K10]; 1xTMT6plex [N-Term]; 1xPhospho [S6(99.3)]	0.00181187	0.00046153	1	4	3	77	Q00566-2	Q00566-2 [383-392]	Q00566-2 1xPhospho [S388(99.3)]	1	1742.97	Q00566-2	Isoform B of Methyl-CpG-binding protein 2 [OS=Rattus norvegicus]	Mecp2	0.930275	0.126821	-0.262611	0.0656452	0.0117	0.3905	0.4813	0.4032	0.629679	0.524758	1	0.601669	0.629525	0.687369	6.971e-05	0.0004102	2.07
[R].YGLLTNTEEHEEMASQDSEEETVFETR.[N]	1xOxidation [M13]; 1xTMT6plex [N-Term]; 2xPhospho [S15(100); S18(100)]	9.19359e-10	7.97536e-05	1	1	1	1	Q9DAZ5	Q9DAZ5 [79-105]	Q9DAZ5 2xPhospho [S93(100); S96(100)]	0	3579.46	Q9DAZ5	Uncharacterized membrane protein C19orf24 homolog [OS=Mus musculus]	1600002K03Rik	0.92789	-0.396832	-0.446371	-0.384763	0.0118	0.1928	0.1577	0.245	0.549428	0.525626	1	0.717358	0.716223	0.543989	1.072e-05	6.985e-12	6.82
[K].ALGRRSESPFEGK.[N]	1xTMT6plex [K13]; 1xTMT6plex [N-Term]; 2xPhospho [S6(100); S8(100)]	0.0416115	0.00350151	1	1	1	1	P15205	P15205 [1412-1424]	P15205 2xPhospho [S1417(100); S1419(100)]	2	2052.01	P15205	microtubule-associated protein 1B [OS=Rattus norvegicus]	Map1b	0.926455	0.00763159	-0.224778	-0.0931319	0.0119	0.7696	0.6038	0.9578	0.642869	0.52615	1	0.685738	0.614857	0.618119	0.001436	0.01803	3.26
[K].RVSSTPETPLTK.[R]	1xTMT6plex [K12]; 1xTMT6plex [N-Term]; 2xPhospho [T8(100); S/T]	0.00358227	0.000710363	1	2	1	1	O89043	O89043 [123-134]	O89043 2xPhospho [T130(100); S/T]	1	1933.98	O89043	DNA polymerase alpha subunit B [OS=Rattus norvegicus]	Pola2	0.924111	0.0318975	-0.197764	0.149008	0.012	0.6864	0.6966	0.2107	0.620606	0.527005	1	0.559706	0.604433	0.617945	0.0001283	0.000983	2.99
[K].VGDTSLDPNDFDFTVTGRGSPSR.[R]	1xTMT6plex [N-Term]; 1xPhospho [T14(97.3)]	0.000114714	7.97536e-05	1	4	2	2	Q00566-2	Q00566-2 [173-195]	Q00566-2 1xPhospho [T186(97.3)]	1	2749.27	Q00566-2	Isoform B of Methyl-CpG-binding protein 2 [OS=Rattus norvegicus]	Mecp2	0.923637	-0.28514	-0.375658	-0.119053	0.0121	0.3475	0.2416	0.9392	0.631169	0.527178	1	0.685464	0.683978	0.561315	1.072e-05	1.236e-05	3.26
[K].ATSPSTLVSTGSSSRSPSTTLPK.[R]	1xTMT6plex [K23]; 1xTMT6plex [N-Term]; 2xPhospho [S5(99.9); T/S]	0.00242564	0.000525785	1	2	2	2	Q5M7W5-1	Q5M7W5-1 [784-806]	Q5M7W5-1 2xPhospho [S788(99.9); T/S]	1	2867.42	Q5M7W5-1	Microtubule-associated protein 4 [OS=Rattus norvegicus]	Map4	0.922556	0.0705347	-0.0191675	0.10106	0.0122	0.5553	0.5759	0.3092	0.623456	0.527574	1	0.581278	0.53463	0.561418	8.648e-05	0.0005995	3.71
[R].RQSFTSLALRK.[R]	1xTMT6plex [K11]; 1xTMT6plex [N-Term]; 1xPhospho [S3(100)]	0.0215965	0.00183926	1	1	1	1	O70511	O70511 [1456-1466]	O70511 1xPhospho [S1458(100)]	2	1845.05	O70511	Ankyrin-3 [OS=Rattus norvegicus]	Ank3	0.922483	-0.00856911	-0.0316238	0.401945	0.0123	0.8275	0.6212	0.0195	0.603587	0.5276	1	0.456817	0.539293	0.536099	0.0007107	0.00676	2.97
[R].SGSGNFGGGR.[G]	1xTMT6plex [N-Term]; 1xPhospho [S3(100)]	0.00128701	7.97536e-05	1	3	1	4	P04256	P04256 [197-206]	P04256 1xPhospho [S199(100)]	0	1204.53	P04256	Heterogeneous nuclear ribonucleoprotein A1 [OS=Rattus norvegicus]	Hnrnpa1	0.922193	0.585081	-0.246774	0.146919	0.0124	0.0069	0.5319	0.215	0.636812	0.527706	1	0.575154	0.62615	0.939303	1.072e-05	0.0002607	3.08
[R].NLLEDDSDEEEDFFLRGPSGPR.[F]	1xTMT6plex [N-Term]; 1xPhospho [S7(100)]	0.00325172	0.000655236	1	1	1	1	O70480	O70480 [24-45]	O70480 1xPhospho [S30(100)]	1	2846.27	O70480	Vesicle-associated membrane protein 4 [OS=Mus musculus]	Vamp4	0.918321	0.0143551	-0.222309	-0.0701952	0.0125	0.7431	0.6116	0.8678	0.526225	0.529124	1	0.552462	0.617276	0.623449	0.0001204	0.0008731	1.92
[K].SGTLKSPPK.[G]	2xTMT6plex [K5; K9]; 1xTMT6plex [N-Term]; 1xPhospho [T/S]	0.0909121	0.00647099	2	9	2	2	Q9ES28-1; O55043	Q9ES28-1 [231-239]; O55043 [74-82]		1	1681.99	Q9ES28-1	Rho guanine nucleotide exchange factor 7 [OS=Mus musculus]	Arhgef7	0.916398	0.0675308	0.363873	0.844079	0.0126	0.5661	0.0169	0.0003	0.659058	0.52983	1	0.367139	0.411718	0.431448	0.002137	0.02556	1.5
[K].VLGRSPLTILQDDNSPGTLTLR.[Q]	1xTMT6plex [N-Term]; 2xPhospho [S5(100); S/T]	5.94342e-05	7.97536e-05	1	2	1	1	Q68FW2	Q68FW2 [200-221]	Q68FW2 2xPhospho [S204(100); S/T]	1	2755.4	Q68FW2	Cell division cycle-associated protein 3 [OS=Rattus norvegicus]	Cdca3	0.914826	0.267844	0.0661175	-0.0933966	0.0127	0.1293	0.2999	0.9591	0.492972	0.530408	1	0.525941	0.506648	0.610008	1.072e-05	5.517e-06	4.77
[K].NYLNYDEEGDQGR.[W]	1xTMT6plex [N-Term]; 1xPhospho [Y5(100)]	0.00345435	0.000310608	1	1	2	12	O35314	O35314 [465-477]	O35314 1xPhospho [Y469(100)]	0	1881.79	O35314	Secretogranin-1 [OS=Rattus norvegicus]	Chgb	-1.53085	-0.897369	0.16034	-0.354307	0.0128	0.0195	0.1316	0.2906	0.782246	0.92112	0.318774	1	0.824231	0.442501	0.0001726	0.001133	2.58
[K].ESESPEK.[G]	1xTMT6plex [K7]; 1xTMT6plex [N-Term]; 1xPhospho [S4(100)]	0.021469	0.00178361	1	1	1	10	Q925T0	Q925T0 [151-157]	Q925T0 1xPhospho [S154(100)]	0	1343.65	Q925T0	DnaJ homolog subfamily C member 12 [OS=Rattus norvegicus]	Dnajc12	0.912483	0.751676	0.119713	-0.302288	0.0129	0.0012	0.1923	0.3899	0.482309	0.53127	1	0.594735	0.488965	0.823294	0.0007107	0.006727	2.37
[K].ENSEGEK.[R]	1xTMT6plex [K7]; 1xTMT6plex [N-Term]; 1xPhospho [S3(100)]	0.00827849	0.00104516	1	2	1	8	O55035	O55035 [654-660]	O55035 1xPhospho [S656(100)]	0	1330.63	O55035	peptidyl-prolyl cis-trans isomerase g [OS=Rattus norvegicus]	Ppig	-1.50327	-0.546612	0.168518	0.114926	0.0129	0.0878	0.1209	0.2788	0.98852	1	0.352754	0.912829	0.889756	0.60915	0.0003191	0.002586	2.85
[R].QPEPHPGSLQLHQDLGLDSPAGQTESNPESPQR.[E]	1xTMT6plex [N-Term]; 1xPhospho [S30(100)]	4.54462e-05	5.91125e-05	1	1	1	1	Q5XIB5	Q5XIB5 [85-117]	Q5XIB5 1xPhospho [S114(100)]	0	3855.81	Q5XIB5	Coiled-coil domain-containing protein 86 [OS=Rattus norvegicus]	Ccdc86	0.903668	0.064847	0.175752	-0.0231662	0.013	0.576	0.1126	0.6945	0.512901	0.534526	1	0.521203	0.473219	0.494975	4.518e-05	4.342e-05	4.35
[K].GVQAGNSDTEGGQPGRK.[R]	1xTMT6plex [K17]; 1xTMT6plex [N-Term]; 1xPhospho [S7(100)]	0.00174666	0.000170064	1	4	1	2	Q9JIX8-4	Q9JIX8-4 [792-808]	Q9JIX8-4 1xPhospho [S798(100)]	1	2196.08	Q9JIX8-4	Isoform 4 of Apoptotic chromatin condensation inducer in the nucleus [OS=Mus musculus]	Acin1	0.902932	-0.389206	-0.155812	-0.0455513	0.0131	0.2002	0.8601	0.7737	0.592057	0.534799	1	0.611049	0.595792	0.454917	0.0001248	0.000646	3.44
[R].HYEDGYPGGSDNYGSLSR.[V]	1xTMT6plex [N-Term]; 1xPhospho [S15(100)]	0.00119687	0.000160309	2	3	1	4	P30999-1; P30999-3	P30999-1 [216-233]; P30999-3 [216-233]	P30999-1 1xPhospho [S230(100)]; P30999-3 1xPhospho [S230(100)]	0	2282.96	P30999-1	Catenin delta-1 [OS=Mus musculus]	Ctnnd1	0.900433	-0.175391	-0.235417	-0.193394	0.0132	0.6071	0.5709	0.6825	0.597743	0.535726	1	0.683489	0.630682	0.558486	0.0001209	0.0004814	3.98
[R].GRESDEDTEDASETDLAK.[H]	1xTMT6plex [K18]; 1xTMT6plex [N-Term]; 1xPhospho [S4(100)]	7.87602e-08	7.97536e-05	1	1	3	8	Q8BR65	Q8BR65 [42-59]	Q8BR65 1xPhospho [S45(100)]	1	2506.12	Q8BR65	Sin3 histone deacetylase corepressor complex component SDS3 [OS=Mus musculus]	Suds3	0.899198	0.306314	-0.487076	-0.120571	0.0133	0.0915	0.1212	0.9329	0.657195	0.536185	1	0.714479	0.751517	0.929284	1.072e-05	1.632e-09	6
[K].QSTETMVSGQTSDKPSRDPETPQSSGSK.[R]	1xOxidation [M6]; 2xTMT6plex [K14; K28]; 1xTMT6plex [N-Term]; 1xPhospho [T21(98.9)]	8.6869e-06	7.97536e-05	1	1	2	2	Q68FW2	Q68FW2 [163-190]	Q68FW2 1xPhospho [T183(98.9)]	1	3735.8	Q68FW2	Cell division cycle-associated protein 3 [OS=Rattus norvegicus]	Cdca3	0.899135	0.301799	0.234612	0.342634	0.0134	0.0955	0.0637	0.036	0.56056	0.536208	1	0.442058	0.45573	0.56177	1.072e-05	5.209e-07	4.47
[K].MKDTDSEEEIREAFR.[V]	1xTMT6plex [K2]; 1xTMT6plex [N-Term]; 1xPhospho [T4(100)]	3.99499e-05	7.97536e-05	1	3	1	4	P62204	P62204 [77-91]	P62204 1xPhospho [T80(100)]	2	2394.14	P62204	Calmodulin [OS=Mus musculus]	Calm3; Calm1; Calm2	0.898068	-0.0708534	-0.348471	-0.268535	0.0135	0.9435	0.2844	0.4664	0.63515	0.536605	1	0.765091	0.683211	0.650468	1.072e-05	3.382e-06	4.26
[K].SQSSGSSATHPISVPGAR.[R]	1xTMT6plex [N-Term]; 1xPhospho [S1(100)]	0.00762545	0.000795509	1	1	1	2	P81122	P81122 [303-320]	P81122 1xPhospho [S303(100)]	0	2034.98	P81122	Insulin receptor substrate 2 [OS=Mus musculus]	Irs2	0.894937	-0.427482	-0.0690941	0.0256498	0.0136	0.1636	0.7737	0.5263	0.578016	0.537771	1	0.567831	0.564153	0.41948	0.0003042	0.002428	3.56
[K].SETMVNAQQTPLGTPK.[E]	1xOxidation [M4]; 1xTMT6plex [K16]; 1xTMT6plex [N-Term]; 2xPhospho [T10(100); T14(100)]	2.24929e-07	7.97536e-05	1	1	1	23	Q920Q0	Q920Q0 [132-147]	Q920Q0 2xPhospho [T141(100); T145(100)]	0	2336.1	Q920Q0	Paralemmin-1 [OS=Rattus norvegicus]	Palm	0.89481	0.151736	-0.212458	-0.274635	0.0137	0.3286	0.6456	0.4525	0.630148	0.537818	1	0.762283	0.623149	0.692259	1.072e-05	5.929e-09	4.94
[K].GEDQGSQRMDFK.[D]	1xTMT6plex [K12]; 1xTMT6plex [N-Term]; 1xPhospho [S6(100)]	0.00827849	0.00104516	1	1	1	1	P60570	P60570 [389-400]	P60570 1xPhospho [S394(100)]	1	1935.9	P60570	Pannexin-1 [OS=Rattus norvegicus]	Panx1	0.889425	0.234195	-0.270147	-0.344067	0.0138	0.1725	0.4595	0.3072	0.545927	0.539829	1	0.692962	0.650997	0.765735	0.0003191	0.002577	1.71
[R].SQSESSDEVTELDLSHGKK.[D]	2xTMT6plex [K18; K19]; 1xTMT6plex [N-Term]; 1xPhospho [S3(100)]	2.55257e-07	7.97536e-05	1	3	1	2	Q7TPS5	Q7TPS5 [657-675]	Q7TPS5 1xPhospho [S659(100)]	1	2843.43	Q7TPS5	C2 domain-containing protein 5 [OS=Mus musculus]	5730419I09Rik; C2cd5	0.887383	-0.423974	-0.288001	0.00736495	0.0139	0.1663	0.41	0.5868	0.636812	0.540594	1	0.63357	0.660037	0.49197	1.072e-05	6.906e-09	5.43
[R].DNLAQQSFNMEQANYTIQSLK.[D]	1xOxidation [M10]; 1xTMT6plex [K21]; 1xTMT6plex [N-Term]; 1xPhospho [S19(100)]	0.000161075	7.97536e-05	1	1	1	2	Q4QQV8	Q4QQV8 [80-100]	Q4QQV8 1xPhospho [S98(100)]	0	2997.44	Q4QQV8	Charged multivesicular body protein 5 [OS=Rattus norvegicus]	Chmp5	0.886822	0.0720003	-0.0623824	0.106218	0.014	0.5501	0.7446	0.2971	0.575761	0.540804	1	0.534894	0.564701	0.593599	1.072e-05	1.877e-05	3.37
[K].SGNLPAK.[R]	1xTMT6plex [K7]; 1xTMT6plex [N-Term]; 1xPhospho [S1(100)]	0.00515374	0.000816232	1	2	1	9	E9PVX6	E9PVX6 [561-567]	E9PVX6 1xPhospho [S561(100)]	0	1224.68	E9PVX6	Proliferation marker protein Ki-67 [OS=Mus musculus]	Mki67	0.886361	0.572726	-0.0629756	-0.00769974	0.0141	0.0088	0.7478	0.6387	0.55052	0.540977	1	0.553466	0.565114	0.840512	0.000183	0.001526	2.76
[R].KDAEGTEEGGEEDDDDEEMDPQTIDSLIELSTK.[L]	2xTMT6plex [K1; K33]; 1xTMT6plex [N-Term]; 1xPhospho [T6(100)]	1.55723e-08	7.97536e-05	1	1	1	1	P20156	P20156 [433-465]	P20156 1xPhospho [T438(100)]	1	4407.99	P20156	Neurosecretory protein VGF [OS=Rattus norvegicus]	Vgf	0.885034	-0.269827	-0.507167	-0.676846	0.0142	0.3755	0.1069	0.0508	0.587888	0.541475	1	0.939822	0.769575	0.6383	1.072e-05	2.243e-10	5.31
[K].THSREQSSQESGEETR.[R]	1xTMT6plex [N-Term]; 1xPhospho [S3(100)]	3.19167e-05	7.97536e-05	1	2	3	6	O35314	O35314 [226-241]	O35314 1xPhospho [S228(100)]	1	2156.94	O35314	Secretogranin-1 [OS=Rattus norvegicus]	Chgb	0.884146	-0.327401	-0.664086	-0.48411	0.0143	0.2772	0.0445	0.1377	0.66162	0.541808	1	0.925422	0.85853	0.684224	1.072e-05	2.561e-06	4.52
[K].EELNENQSTPKK.[E]	2xTMT6plex [K11; K12]; 1xTMT6plex [N-Term]; 1xPhospho [T9(99.1)]	0.0020217	0.00046153	2	2	2	2	Q5F2E8; O88664	Q5F2E8 [568-579]; O88664 [568-579]	Q5F2E8 1xPhospho [T576(99.1)]; O88664 1xPhospho [T576(99.1)]	1	2184.15	Q5F2E8	Serine/threonine-protein kinase TAO1 [OS=Mus musculus]	Taok1	0.882066	0.17654	0.104874	0.363658	0.0144	0.2707	0.218	0.0296	0.595716	0.54259	1	0.462985	0.504547	0.570224	6.971e-05	0.0004733	2.91
[K].TSPVVAPTSEPSSPLHTQLLK.[D]	1xTMT6plex [K21]; 1xTMT6plex [N-Term]; 2xPhospho [S12(97.9); S13(99.8)]	1.71285e-05	7.97536e-05	1	2	3	3	Q91Z67	Q91Z67 [982-1002]	Q91Z67 2xPhospho [S993(97.9); S994(99.8)]	0	2807.44	Q91Z67	SLIT-ROBO Rho GTPase-activating protein 2 [OS=Mus musculus]	Srgap2	0.880248	-0.356003	-0.212734	-0.151524	0.0145	0.2379	0.6448	0.82	0.605124	0.543274	1	0.672137	0.62959	0.491916	1.072e-05	1.198e-06	4.29
[K].SPHLPAPTGLFDDDDNDSDEDDNFFMPSSSKPSK.[T]	2xTMT6plex [K31; K34]; 1xTMT6plex [N-Term]; 1xPhospho [S18(98.6)]	5.2147e-05	7.97536e-05	1	1	2	2	Q80X08	Q80X08 [431-464]	Q80X08 1xPhospho [S448(98.6)]	0	4492.04	Q80X08	WASH complex subunit 2 [OS=Rattus norvegicus]	Fam21c; Washc2c	0.877538	-0.0460651	-0.0278033	0.317641	0.0146	0.9684	0.6067	0.0449	0.5816	0.544296	1	0.466665	0.554887	0.537449	1.072e-05	4.691e-06	4.08
[R].WSWGSPLHGSSSIHSGDPDRR.[S]	1xTMT6plex [N-Term]; 1xPhospho [S5(100)]	0.0253815	0.00210445	1	2	1	1	O88735	O88735 [160-180]	O88735 1xPhospho [S164(100)]	1	2630.21	O88735	Ensconsin [OS=Mus musculus]	Map7; Mtap7	0.877464	-0.358965	-0.466612	-0.266711	0.0147	0.2351	0.1393	0.4725	0.596868	0.544323	1	0.718069	0.752179	0.586492	0.0008309	0.007833	3.36
[K].NITGSSPVADFSAIK.[E]	1xTMT6plex [K15]; 1xTMT6plex [N-Term]; 1xPhospho [S/T]	0.000754305	7.97536e-05	1	1	2	3	P42567-1	P42567-1 [319-333]		0	2045.07	P42567-1	epidermal growth factor receptor substrate 15 [OS=Mus musculus]	Eps15	0.876275	0.0942957	-0.442592	-0.443978	0.0148	0.4829	0.1619	0.1745	0.649632	0.544772	1	0.883727	0.740369	0.790377	1.072e-05	0.00013	2.74
[R].SGYSSPGSPGTPGSR.[S]	1xTMT6plex [N-Term]; 4xPhospho [S4(100); S5(100); S8(100); S14(97.7)]	0.0175033	0.00145239	3	14	2	2	P19332-1; P19332-6; P19332-3	P19332-1 [506-520]; P19332-6 [128-142]; P19332-3 [157-171]	P19332-1 4xPhospho [S509(100); S510(100); S513(100); S519(97.7)]; P19332-6 4xPhospho [S131(100); S132(100); S135(100); S141(97.7)]; P19332-3 4xPhospho [S160(100); S161(100); S164(100); S170(97.7)]	0	1942.66	P19332-1	Microtubule-associated protein tau [OS=Rattus norvegicus]	Mapt	0.875429	-0.193397	-0.274804	-0.344453	0.0149	0.5535	0.4452	0.3064	0.632812	0.545092	1	0.803462	0.659468	0.576734	0.0005737	0.005521	2.38
[R].RPSTPK.[K]	1xTMT6plex [K6]; 1xTMT6plex [N-Term]; 1xPhospho [S3(100)]	0.0745275	0.00524085	1	2	1	2	E9PVX6	E9PVX6 [631-636]	E9PVX6 1xPhospho [S633(100)]	0	1223.69	E9PVX6	Proliferation marker protein Ki-67 [OS=Mus musculus]	Mki67	0.873753	-0.261855	-0.458553	-0.611642	0.015	0.3944	0.1462	0.0679	0.577657	0.545726	1	0.882658	0.749916	0.625441	0.001834	0.02114	1.82
[R].VQAMQISEKEDDDNEK.[R]	2xTMT6plex [K9; K16]; 1xTMT6plex [N-Term]; 1xPhospho [S7(100)]	5.94342e-05	7.97536e-05	1	3	1	2	Q5XIM5	Q5XIM5 [125-140]	Q5XIM5 1xPhospho [S131(100)]	1	2646.29	Q5XIM5	Protein CDV3 homolog [OS=Rattus norvegicus]	Cdv3	0.873302	0.0681929	-0.340791	-0.106853	0.0151	0.5632	0.2975	0.9873	0.664639	0.545896	1	0.715734	0.691351	0.724814	1.072e-05	5.502e-06	3.3
[K].KPLPDHVSIVEPKDEILPTTPISEQK.[G]	3xTMT6plex [K1; K13; K26]; 1xTMT6plex [N-Term]; 1xPhospho [T20(100)]	0.000135112	5.91125e-05	1	1	2	6	P62909	P62909 [202-227]	P62909 1xPhospho [T221(100)]	1	3907.2	P62909	40S ribosomal protein S3 [OS=Rattus norvegicus]	Rps3	0.872455	-0.169147	-0.355798	-0.13568	0.0152	0.6241	0.2728	0.8769	0.644824	0.546217	1	0.70841	0.69899	0.621659	5.611e-05	9.955e-05	3.98
[R].HMSESPNRK.[VI]	1xOxidation [M2]; 1xTMT6plex [K9]; 1xTMT6plex [N-Term]; 1xPhospho [S5(100)]	0.112326	0.00790655	1	2	1	1	O55035	O55035 [409-417]	O55035 1xPhospho [S413(100)]	1	1639.8	O55035	peptidyl-prolyl cis-trans isomerase g [OS=Rattus norvegicus]	Ppig	-1.32643	-0.189337	-0.0889603	0.193154	0.0152	0.5656	0.8561	0.1421	1	0.918339	0.366192	0.874691	0.976749	0.856617	0.002515	0.03116	1.85
[K].SPHVTAPGSASK.[G]	1xTMT6plex [K12]; 1xTMT6plex [N-Term]; 1xPhospho [S9(100)]	4.28271e-06	7.97536e-05	1	2	2	7	Q9ERH4-1	Q9ERH4-1 [290-301]	Q9ERH4-1 1xPhospho [S298(100)]	0	1676.88	Q9ERH4-1	Nucleolar and spindle-associated protein 1 [OS=Mus musculus]	Nusap1	0.87056	0.723759	0.0387396	0.073817	0.0153	0.0015	0.3734	0.3796	0.49824	0.546935	1	0.473388	0.532444	0.87932	1.072e-05	2.18e-07	4.75
[K].GSGIFDESTPVQTR.[Q]	1xTMT6plex [N-Term]; 1xPhospho [T9(99)]	1.88977e-05	7.97536e-05	1	2	3	10	Q5BK20	Q5BK20 [68-81]	Q5BK20 1xPhospho [T76(99)]	0	1802.85	Q5BK20	Jupiter microtubule associated homolog 2 [OS=Rattus norvegicus]	Hn1l; Jpt2	0.870401	0.178218	-0.143848	-0.203528	0.0154	0.2672	0.9093	0.6497	0.627876	0.546995	1	0.723005	0.604346	0.683809	1.072e-05	1.35e-06	3.89
[R].MLPHAPGVQMQAIPEDAIPEESGDEDEEDPDKR.[I]	1xOxidation [M]; 1xTMT6plex [K32]; 1xTMT6plex [N-Term]; 1xPhospho [S22(100)]	5.20318e-09	7.97536e-05	1	2	2	13	Q4QQW4	Q4QQW4 [372-404]	Q4QQW4 1xPhospho [S393(100)]	1	4199.92	Q4QQW4	histone deacetylase 1 [OS=Rattus norvegicus]	Hdac1	0.869995	0.198215	-0.10843	0.355745	0.0155	0.2304	0.9406	0.0315	0.658452	0.547149	1	0.514558	0.589856	0.676729	1.072e-05	5.858e-11	5.66
[K].KGPSTPYTK.[S]	2xTMT6plex [K1; K9]; 1xTMT6plex [N-Term]; 1xPhospho [T5(100)]	0.00657801	0.000930136	1	2	1	1	Q6PDG5-1	Q6PDG5-1 [318-326]	Q6PDG5-1 1xPhospho [T322(100)]	1	1745.98	Q6PDG5-1	SWI/SNF complex subunit SMARCC2 [OS=Mus musculus]	Smarcc2	0.869571	0.125631	0.395662	0.382519	0.0156	0.3943	0.0124	0.0241	0.489022	0.54731	1	0.375127	0.416032	0.453885	0.0002594	0.002014	2.52
[K].RTADSSSSEDEEEYVVEK.[V]	1xTMT6plex [K18]; 1xTMT6plex [N-Term]; 2xPhospho [S7(98.9); S8(100)]	7.94732e-06	7.97536e-05	1	1	1	1	Q61686	Q61686 [7-24]	Q61686 2xPhospho [S13(98.9); S14(100)]	1	2678.15	Q61686	chromobox protein homolog 5 [OS=Mus musculus]	Cbx5	0.868653	-0.404454	-0.120792	-0.143441	0.0157	0.1834	0.9937	0.8473	0.527649	0.547658	1	0.582808	0.595485	0.449902	1.072e-05	4.666e-07	4.35
[K].DPAHGGASSEMSSNHQ.[-]	1xOxidation [M11]; 1xTMT6plex [N-Term]; 1xPhospho [S8(100)]	1.69402e-06	7.97536e-05	1	3	2	54	P01346	P01346 [165-180]	P01346 1xPhospho [S172(100)]	0	1936.77	P01346	Insulin-like growth factor II [OS=Rattus norvegicus]	Igf2	0.868014	0.0701675	-0.225634	-0.244079	0.0158	0.5566	0.6014	0.532	0.588392	0.547901	1	0.696854	0.640655	0.672584	1.072e-05	7.028e-08	3.69
[R].DNLAQQSFNMEQANYTIQSLK.[D]	1xTMT6plex [K21]; 1xTMT6plex [N-Term]; 1xPhospho [S7(100)]	5.14105e-06	7.97536e-05	1	1	2	2	Q4QQV8	Q4QQV8 [80-100]	Q4QQV8 1xPhospho [S86(100)]	0	2981.45	Q4QQV8	Charged multivesicular body protein 5 [OS=Rattus norvegicus]	Chmp5	0.867869	0.597518	0.0701417	0.0698967	0.0159	0.0062	0.2895	0.3923	0.662345	0.547955	1	0.63102	0.521952	0.789771	1.072e-05	2.74e-07	4.21
[R].SASESAGSSGTA.[-]	1xTMT6plex [N-Term]; 1xPhospho [S3(100)]	0.0178084	0.00145239	1	1	1	4	Q8BGH4	Q8BGH4 [190-201]	Q8BGH4 1xPhospho [S192(100)]	0	1320.55	Q8BGH4	Receptor expression-enhancing protein 1 [OS=Mus musculus]	Reep1	0.866107	-0.354347	-0.234252	0.0339174	0.016	0.2397	0.5746	0.5007	0.644988	0.548625	1	0.630002	0.645346	0.504805	0.0005808	0.005625	2.27
[R].SRSSPSTDHYSQEVPVEPNR.[Q]	1xTMT6plex [N-Term]; 2xPhospho [S4(97.1); S/T/Y]	4.76985e-06	7.97536e-05	2	2	1	1	A2ALU4; Q7TP36	A2ALU4 [957-976]; Q7TP36 [828-847]	A2ALU4 2xPhospho [S960(97.1); S/T/Y]; Q7TP36 2xPhospho [S831(97.1); S/T/Y]	1	2661.15	A2ALU4	Protein Shroom2 [OS=Mus musculus]	Shroom2	0.865254	-0.221855	-0.503442	-0.439019	0.0161	0.483	0.1094	0.1799	0.616707	0.54895	1	0.836059	0.778186	0.667265	1.072e-05	2.495e-07	4.85
[R].DLFSLDSEGPSPASPPLR.[S]	1xTMT6plex [N-Term]; 2xPhospho [S11(98.2); S14(100)]	0.000239865	7.97536e-05	1	1	2	2	Q5M865	Q5M865 [223-240]	Q5M865 2xPhospho [S233(98.2); S236(100)]	0	2274.03	Q5M865	PAXIP1-associated glutamate-rich protein 1 [OS=Rattus norvegicus]	RGD1305592; Pagr1	0.864968	0.174623	-0.242881	-0.359557	0.0162	0.2758	0.5445	0.2822	0.589132	0.549058	1	0.755874	0.64973	0.733331	1.072e-05	3.082e-05	3.53
[K].TPPGSGEPPKSGER.[S]	1xTMT6plex [K10]; 1xTMT6plex [N-Term]; 1xPhospho [S11(100)]	0.11685	0.00834196	3	14	1	1	P19332-1; P19332-6; P19332-3	P19332-1 [492-505]; P19332-6 [114-127]; P19332-3 [143-156]	P19332-1 1xPhospho [S502(100)]; P19332-6 1xPhospho [S124(100)]; P19332-3 1xPhospho [S153(100)]	1	1933.98	P19332-1	Microtubule-associated protein tau [OS=Rattus norvegicus]	Mapt	0.864717	0.109143	-0.180031	-0.0464103	0.0163	0.4392	0.7657	0.7777	0.649769	0.549154	1	0.671011	0.622141	0.671033	0.00261	0.03237	3.3
[K].DWILPSDYDHAEAEAR.[H]	1xTMT6plex [N-Term]; 1xPhospho [S6(100)]	0.00777126	0.000795509	2	2	1	2	O35783; O35887	O35783 [256-271]; O35887 [256-271]	O35783 1xPhospho [S261(100)]; O35887 1xPhospho [S261(100)]	0	2196.98	O35783	Calumenin [OS=Rattus norvegicus]	Calu	0.864487	0.257859	-0.607248	-0.726928	0.0164	0.1413	0.0608	0.0402	0.553082	0.549006	0.99957	0.915412	0.836328	1	0.0003091	0.00248	2.55
[K].DSGSDLSHRPK.[R]	1xTMT6plex [K11]; 1xTMT6plex [N-Term]; 1xPhospho [S2(100)]	0.00866922	0.00109238	1	7	2	8	Q810T5-1	Q810T5-1 [162-172]	Q810T5-1 1xPhospho [S163(100)]	0	1736.87	Q810T5-1	Histone acetyltransferase KAT7 [OS=Rattus norvegicus]	Kat7	0.861375	-0.0482844	-0.403711	-0.307351	0.0165	0.9751	0.203	0.3779	0.677885	0.550428	1	0.838837	0.728164	0.704197	0.0003256	0.002707	3.22
[K].SRWDETPASQMGGSTPVLTPGK.[T]	1xTMT6plex [K22]; 1xTMT6plex [N-Term]; 1xPhospho [S/T]	7.80257e-08	7.97536e-05	1	1	1	3	Q99NB9	Q99NB9 [336-357]		1	2840.41	Q99NB9	splicing factor 3B subunit 1 [OS=Mus musculus]	Sf3b1	0.861182	-0.18728	-0.0822184	0.0189551	0.0166	0.5726	0.8266	0.5489	0.597363	0.550501	1	0.589566	0.582785	0.511837	1.072e-05	1.619e-09	4.93
[K].SMLQTPPDQNLSGSKSPCPQK.[S]	1xCarbamidomethyl [C18]; 2xTMT6plex [K15; K21]; 1xTMT6plex [N-Term]; 2xPhospho [T5(100); S16(98.9)]	0.000175106	7.97536e-05	1	3	1	1	Q8BTI8	Q8BTI8 [969-989]	Q8BTI8 2xPhospho [T973(100); S984(98.9)]	1	3147.52	Q8BTI8	serine/arginine repetitive matrix protein 2 [OS=Mus musculus]	Srrm2	0.860697	-0.537481	-0.234177	-0.00318793	0.0167	0.0918	0.5749	0.6241	0.559044	0.550687	1	0.560281	0.647737	0.446273	1.072e-05	2.084e-05	4.4
[R].GSPHSEGGKRSPEPSK.[T]	2xTMT6plex [K9; K16]; 1xTMT6plex [N-Term]; 1xPhospho [S11(100)]	6.22757e-05	7.97536e-05	1	2	2	10	Q9WU42-1	Q9WU42-1 [2151-2166]	Q9WU42-1 1xPhospho [S2161(100)]	2	2404.26	Q9WU42-1	Nuclear receptor corepressor 2 [OS=Mus musculus]	Ncor2	0.860208	0.0905044	-0.139	0.0764449	0.0168	0.4945	0.9304	0.3724	0.662102	0.550873	1	0.627932	0.606589	0.645861	1.072e-05	5.83e-06	3.82
[K].THSREQSSQESGEETRR.[Q]	1xTMT6plex [N-Term]; 1xPhospho [S7(97.7)]	0.000332562	7.97536e-05	1	2	2	2	O35314	O35314 [226-242]	O35314 1xPhospho [S232(97.7)]	2	2313.04	O35314	Secretogranin-1 [OS=Rattus norvegicus]	Chgb	0.85972	-0.274978	-0.567288	-0.400411	0.0169	0.3659	0.0742	0.2238	0.687291	0.551059	1	0.907144	0.816524	0.674827	1.072e-05	4.623e-05	3.67
[K].VNSEPSSPQGGK.[Q]	1xTMT6plex [K12]; 1xTMT6plex [N-Term]; 1xPhospho [S7(99.2)]	0.00112739	7.97536e-05	1	1	2	4	D4A4D7	D4A4D7 [425-436]	D4A4D7 1xPhospho [S431(99.2)]	0	1724.86	D4A4D7	Transcription factor E2F7 [OS=Rattus norvegicus]	E2f7	0.858425	0.128247	-0.502437	-0.306169	0.017	0.3863	0.1104	0.3807	0.561443	0.551554	1	0.69418	0.781334	0.853971	1.072e-05	0.0002189	2.29
[K].DTMTAQNTGVSTLYRNSYGAPAEDIK.[Q]	1xOxidation [M3]; 1xTMT6plex [K26]; 1xTMT6plex [N-Term]; 1xPhospho [S17(100)]	2.40713e-06	7.97536e-05	1	2	2	2	O35927	O35927 [1133-1158]	O35927 1xPhospho [S1149(100)]	1	3357.61	O35927	Catenin delta-2 [OS=Mus musculus]	Ctnnd2	0.858425	-0.140644	-0.481138	-0.154204	0.0171	0.7084	0.1257	0.8095	0.603606	0.551554	1	0.671697	0.769884	0.698372	1.072e-05	1.079e-07	4.56
[K].EENQTGPTTTPSDTQDLDMK.[K]	1xTMT6plex [K20]; 1xTMT6plex [N-Term]; 2xPhospho [T9(97.3); S12(100)]	1.92242e-06	7.97536e-05	1	3	1	2	Q920Q0	Q920Q0 [354-373]	Q920Q0 2xPhospho [T362(97.3); S365(100)]	0	2826.22	Q920Q0	Paralemmin-1 [OS=Rattus norvegicus]	Palm	0.857282	0.00362326	-0.259539	-0.409604	0.0172	0.7847	0.4906	0.2122	0.611329	0.551992	1	0.812041	0.660787	0.662449	1.072e-05	8.173e-08	5.12
[K].FLQDHGSDSFLAEHK.[L]	1xTMT6plex [K15]; 1xTMT6plex [N-Term]; 1xPhospho [S9(100)]	1.0604e-06	7.97536e-05	1	1	2	10	Q62446	Q62446 [28-42]	Q62446 1xPhospho [S36(100)]	0	2269.11	Q62446	peptidyl-prolyl cis-trans isomerase FKBP3 [OS=Mus musculus]	Fkbp3	0.857233	0.0609435	-0.348748	-0.119501	0.0173	0.5883	0.2835	0.937	0.640209	0.55201	1	0.695497	0.70296	0.733292	1.072e-05	3.955e-08	4.61
[K].EAGTDAVPASTQEQDQAQGSSSPEPAGSPSEGEGVSTWESFK.[R]	1xTMT6plex [K42]; 1xTMT6plex [N-Term]; 3xPhospho [S/T]	0.0611449	0.00456774	1	3	1	2	Q5QD51-1	Q5QD51-1 [709-750]		0	4921.07	Q5QD51-1	A-kinase anchor protein 12 [OS=Rattus norvegicus]	Akap12	0.856863	-0.163148	-0.552491	-0.656538	0.0174	0.6402	0.0812	0.0551	0.568613	0.552152	1	0.896302	0.809795	0.723207	0.001633	0.01759	2.39
[R].QNALLFAEEEDGEAGAEDKRSQEEAPGHR.[R]	1xTMT6plex [K19]; 1xTMT6plex [N-Term]; 1xPhospho [S21(100)]	0.000115373	5.91125e-05	1	1	1	4	P20156	P20156 [403-431]	P20156 1xPhospho [S423(100)]	2	3721.75	P20156	Neurosecretory protein VGF [OS=Rattus norvegicus]	Vgf	0.853913	-0.182145	-0.644628	-0.514774	0.0175	0.5867	0.0512	0.1164	0.587174	0.553282	1	0.838937	0.864966	0.762373	5.611e-05	8.95e-05	4.45
[K].QKEDVEGVGTSDGEGAAGLSSDPK.[S]	2xTMT6plex [K2; K24]; 1xTMT6plex [N-Term]; 1xPhospho [T/S]	0.000954897	0.000160309	1	2	1	2	Q6YDN7	Q6YDN7 [32-55]		1	3100.53	Q6YDN7	Anaphase-promoting complex subunit CDC26 [OS=Rattus norvegicus]	Cdc26	0.853395	-0.322199	-0.158063	-0.100525	0.0176	0.2858	0.8517	0.986	0.576112	0.553481	1	0.617686	0.617567	0.493961	0.0001126	0.0004056	4.8
[K].RNSSPRSPTNSSEIFTPAHEENVR.[F]	1xTMT6plex [N-Term]; 3xPhospho [S3(99.9); S4(96.7); S/T]	7.09721e-05	7.97536e-05	1	1	1	1	B0BN72	B0BN72 [15-38]	B0BN72 3xPhospho [S17(99.9); S18(96.7); S/T]	2	3181.37	B0BN72	Mapk-regulated corepressor-interacting protein 1 [OS=Rattus norvegicus]	Fam195b; Mcrip1	0.852571	-0.0483175	0.0493082	-0.103084	0.0176	0.9754	0.3445	0.9972	0.604733	0.553797	1	0.649523	0.535189	0.517562	1.072e-05	6.835e-06	4.1
[R].GEGAQDEEEGGASSDATEGHDEDDEIYEGEYQGIPR.[A]	1xTMT6plex [N-Term]; 3xPhospho [S13(100); S14(100); T17(100)]	9.72437e-08	7.97536e-05	1	2	1	1	Q9JIS5	Q9JIS5 [68-103]	Q9JIS5 3xPhospho [S80(100); S81(100); T84(100)]	0	4310.6	Q9JIS5	Synaptic vesicle glycoprotein 2A [OS=Mus musculus]	Sv2a	0.848625	-0.335076	-0.268739	-0.423906	0.0177	0.2656	0.4634	0.1946	0.588903	0.555314	1	0.790046	0.669017	0.530358	1.072e-05	2.116e-09	6.38
[K].SPATSPISSNSHRSLDGLSR.[T]	1xTMT6plex [N-Term]; 1xPhospho [S14(100)]	0.000802527	7.97536e-05	1	3	1	1	O88738	O88738 [580-599]	O88738 1xPhospho [S593(100)]	1	2378.17	O88738	Baculoviral IAP repeat-containing protein 6 [OS=Mus musculus]	Birc6	0.848555	-0.178122	-0.321118	-0.329307	0.0178	0.5976	0.3361	0.3345	0.677037	0.555341	1	0.850637	0.693786	0.613205	1.072e-05	0.0001408	2.14
[K].YAEISSDEDNDSDEAFESSRK.[R]	1xTMT6plex [K21]; 1xTMT6plex [N-Term]; 2xPhospho [S5(100); S6(100)]	1.25835e-09	7.97536e-05	1	2	1	1	Q6KCD5-1	Q6KCD5-1 [1079-1099]	Q6KCD5-1 2xPhospho [S1083(100); S1084(100)]	1	3012.24	Q6KCD5-1	Nipped-B-like protein [OS=Mus musculus]	Nipbl	0.848025	-0.114681	-0.172689	-0.00533256	0.0179	0.791	0.7935	0.6325	0.663311	0.555545	1	0.665767	0.626186	0.578337	1.072e-05	1.029e-11	6.52
[K].AELVVIEDSVTPREPAPLNGSAAELPATK.[E]	1xTMT6plex [K29]; 1xTMT6plex [N-Term]; 1xPhospho [S21(100)]	1.75871e-06	7.97536e-05	1	1	2	3	Q920Q0	Q920Q0 [325-353]	Q920Q0 1xPhospho [S345(100)]	1	3512.87	Q920Q0	Paralemmin-1 [OS=Rattus norvegicus]	Palm	0.847895	0.221202	-0.420428	-0.166	0.018	0.192	0.1837	0.7686	0.672	0.555595	1	0.753946	0.743566	0.866778	1.072e-05	7.362e-08	3.32
[K].RSESPPAELPSLR.[R]	1xTMT6plex [N-Term]; 1xPhospho [S]	2.73211e-08	7.97536e-05	1	3	3	26	G5E870	G5E870 [309-321]		1	1747.89	G5E870	E3 ubiquitin-protein ligase TRIP12 [OS=Mus musculus]	Trip12	0.845309	-0.264456	-0.269551	-0.0793038	0.0181	0.3879	0.461	0.8993	0.62054	0.556592	1	0.655605	0.670934	0.558561	1.072e-05	4.469e-10	5.6
[K].SKSEEAHAEDSVMDHHFR.[K]	1xTMT6plex [K2]; 1xTMT6plex [N-Term]; 1xPhospho [S3(98.9)]	0.0110608	0.00104882	2	5	3	5	Q6AXS5-2; Q6AXS5	Q6AXS5-2 [312-329]; Q6AXS5 [327-344]	Q6AXS5-2 1xPhospho [S314(98.9)]; Q6AXS5 1xPhospho [S329(98.9)]	1	2650.21	Q6AXS5-2	Isoform 2 of Plasminogen activator inhibitor 1 RNA-binding protein [OS=Rattus norvegicus]	Serbp1	0.845234	-0.14622	0.229252	0.361238	0.0182	0.6902	0.0667	0.0303	0.692717	0.556621	1	0.539277	0.47484	0.429073	0.0003928	0.003708	6.05
[K].AAGDASQEPK.[R]	1xTMT6plex [K10]; 1xTMT6plex [N-Term]; 1xPhospho [S6(100)]	0.0386547	0.00287859	1	1	1	1	B4F777	B4F777 [6-15]	B4F777 1xPhospho [S11(100)]	0	1511.75	B4F777	High mobility group nucleosome-binding domain-containing protein 5 [OS=Rattus norvegicus]	Hmgn5; Hmgn5b; Nsbp1_predicted	0.844573	0.166675	-0.149907	0.187637	0.0183	0.293	0.885	0.149	0.680353	0.556876	1	0.597379	0.617852	0.69352	0.001165	0.01155	1.66
[K].ENNVSQPASSSSSSSSSNNGSSSPTK.[T]	1xTMT6plex [K26]; 1xTMT6plex [N-Term]; 1xPhospho [S23(98.8)]	0.000948868	0.000160309	1	1	1	2	Q62445	Q62445 [112-137]	Q62445 1xPhospho [S134(98.8)]	0	3052.37	Q62445	Transcription factor Sp4 [OS=Mus musculus]	Sp4	0.844022	0.0496699	-0.120511	0.146877	0.0184	0.6257	0.9928	0.2152	0.613209	0.557088	1	0.553853	0.605622	0.626836	0.0001126	0.0004043	2.75
[R].AAQPSVTASPQTEEFFDLIASSQSR.[R]	1xTMT6plex [N-Term]; 1xPhospho [S9(100)]	3.95609e-10	7.97536e-05	1	4	2	14	Q9R080-1	Q9R080-1 [535-559]	Q9R080-1 1xPhospho [S543(100)]	0	2976.42	Q9R080-1	G-protein-signaling modulator 1 [OS=Rattus norvegicus]	Gpsm1	0.842102	-0.158806	-0.364404	-0.416259	0.0185	0.653	0.2585	0.2032	0.575882	0.55783	1	0.768493	0.718123	0.64327	1.072e-05	2.492e-12	6.03
[R].RTNSDSALHQSTMTPTQAESFTGGPQDAHQK.[R]	1xTMT6plex [K31]; 1xTMT6plex [N-Term]; 1xPhospho [T2(98.9)]	5.75214e-05	5.91125e-05	1	1	1	3	Q157S1	Q157S1 [148-178]	Q157S1 1xPhospho [T149(98.9)]	1	3866.82	Q157S1	CREB-regulated transcription coactivator 1 [OS=Rattus norvegicus]	Crtc1	0.841977	-0.0366428	-0.234214	-0.175154	0.0186	0.9346	0.5747	0.7393	0.643507	0.557878	1	0.726574	0.656213	0.639756	5.611e-05	5.34e-05	7.12
[K].STSAPQMSPGSSDNQSSSPQPAQQK.[L]	1xTMT6plex [K25]; 1xTMT6plex [N-Term]; 3xPhospho [S8(100); S/T]	1.0775e-05	7.97536e-05	1	5	2	4	Q80X50	Q80X50 [480-504]	Q80X50 3xPhospho [S487(100); S/T]	0	3230.35	Q80X50	Ubiquitin-associated protein 2-like [OS=Mus musculus]	Ubap2l	0.841229	0.0321795	-0.338835	-0.381036	0.0187	0.686	0.3013	0.25	0.637984	0.558168	1	0.830832	0.705934	0.721857	1.072e-05	6.786e-07	3.56
[R].VRNMSPDEIK.[I]	1xTMT6plex [K10]; 1xTMT6plex [N-Term]; 1xPhospho [S5(100)]	0.0615481	0.00456774	1	1	1	1	Q02614	Q02614 [109-118]	Q02614 1xPhospho [S113(100)]	1	1726.9	Q02614	SAP30-binding protein [OS=Mus musculus]	Sap30bp	0.8412	0.163004	-0.192893	-0.0632587	0.0188	0.3021	0.7138	0.8394	0.661042	0.558179	1	0.690672	0.638028	0.714347	0.001639	0.0177	2.69
[K].SKSPPKVPIVIQDDSLPTGPPPQIR.[I]	2xTMT6plex [K2; K6]; 1xTMT6plex [N-Term]; 1xPhospho [S3(99.2)]	5.1768e-05	5.91125e-05	1	3	2	8	Q6NXN1-1	Q6NXN1-1 [37-61]	Q6NXN1-1 1xPhospho [S39(99.2)]	2	3433.94	Q6NXN1-1	SUZ domain-containing protein 1 [OS=Mus musculus]	Szrd1	0.837921	0.0191995	-0.159303	0.0585009	0.0189	0.7262	0.8453	0.4224	0.682232	0.559449	1	0.655121	0.624763	0.633133	4.518e-05	4.875e-05	6.11
[K].RSRSPFASTR.[R]	1xTMT6plex [N-Term]; 1xPhospho [S4(98.3)]	0.0130622	0.00128835	1	4	2	3	O55176	O55176 [29-38]	O55176 1xPhospho [S32(98.3)]	2	1473.75	O55176	E3 ubiquitin-protein ligase Praja-1 [OS=Mus musculus]	Pja1	0.837871	0.111108	-0.135327	0.0766943	0.019	0.4337	0.9466	0.3716	0.697109	0.559469	1	0.661018	0.614488	0.663682	0.0004581	0.004133	2.59
[K].SVEAAAELSAK.[D]	1xTMT6plex [K11]; 1xTMT6plex [N-Term]; 1xPhospho [S1(100)]	3.92784e-07	7.97536e-05	1	2	1	4	P04550	P04550 [5-15]	P04550 1xPhospho [S5(100)]	0	1613.86	P04550	Parathymosin [OS=Rattus norvegicus]	Ptms	0.837707	0.0611986	-0.302149	-0.462081	0.0191	0.5875	0.3784	0.1557	0.58856	0.559532	1	0.810758	0.689892	0.719786	1.072e-05	1.17e-08	4.95
[R].GSPHLLGAGDNSTSDRK.[S]	1xTMT6plex [K17]; 1xTMT6plex [N-Term]; 1xPhospho [S2(100)]	6.37467e-05	7.97536e-05	1	1	1	2	Q8VC31	Q8VC31 [134-150]	Q8VC31 1xPhospho [S135(100)]	1	2250.13	Q8VC31	coiled-coil domain-containing protein 9 [OS=Mus musculus]	Ccdc9	0.837557	0.111962	-0.231951	-0.215839	0.0192	0.431	0.5813	0.6129	0.608905	0.55959	1	0.70717	0.657195	0.710229	1.072e-05	5.995e-06	3.51
[R].SAPGGGNK.[V]	1xTMT6plex [K8]; 1xTMT6plex [N-Term]; 1xPhospho [S1(100)]	0.001298	7.97536e-05	2	3	1	3	Q61937; P13084	Q61937 [143-150]; P13084 [143-150]	Q61937 1xPhospho [S143(100)]; P13084 1xPhospho [S143(100)]	0	1225.63	Q61937	Nucleophosmin [OS=Mus musculus]	Npm1	0.837108	0.446433	0.300235	0.147619	0.0193	0.0253	0.0326	0.2139	0.541327	0.559765	1	0.488677	0.454596	0.619463	1.072e-05	0.0002634	2.98
[K].KGNAEGSSDEEGK.[L]	2xTMT6plex [K1; K13]; 1xTMT6plex [N-Term]; 1xPhospho [S8(99.2)]	0.00378367	0.000334627	1	1	2	3	Q8VHK7	Q8VHK7 [126-138]	Q8VHK7 1xPhospho [S133(99.2)]	1	2075.03	Q8VHK7	hepatoma-derived growth factor [OS=Rattus norvegicus]	Hdgf	0.836054	0.134239	0.0060114	-0.109392	0.0194	0.3692	0.478	0.9774	0.62911	0.560174	1	0.678667	0.557844	0.612242	0.000177	0.001224	4.18
[K].KYVISDEEEEEDD.[-]	1xTMT6plex [K1]; 1xTMT6plex [N-Term]; 1xPhospho [S5(100)]	0.00363021	0.000710363	1	2	1	19	Q641X2	Q641X2 [666-678]	Q641X2 1xPhospho [S670(100)]	1	2137.95	Q641X2	RNA polymerase-associated protein LEO1 [OS=Rattus norvegicus]	Leo1	-1.17039	-0.501058	0.209499	0.181791	0.0195	0.1115	0.0801	0.1573	0.97341	1	0.444301	0.858166	0.864838	0.611084	0.000135	0.001	2.53
[R].LSESVVNR.[M]	1xTMT6plex [N-Term]; 1xPhospho [S4(100)]	0.00946793	0.00109238	1	2	1	3	D4A7N1	D4A7N1 [30-37]	D4A7N1 1xPhospho [S33(100)]	0	1212.62	D4A7N1	MICOS complex subunit mic25 [OS=Rattus norvegicus]	Chchd6	0.835302	0.515427	-0.321392	-0.0588207	0.0196	0.0142	0.3358	0.824	0.594873	0.559877	0.998949	0.619628	0.699586	1	0.000362	0.002981	2.82
[R].RPSPEPGAGDNR.[L]	1xTMT6plex [N-Term]; 1xPhospho [S3(100)]	0.000453738	7.97536e-05	1	1	1	11	Q9EQ60	Q9EQ60 [539-550]	Q9EQ60 1xPhospho [S541(100)]	0	1561.73	Q9EQ60	voltage-dependent T-type calcium channel subunit alpha-1H [OS=Rattus norvegicus]	Cacna1h	0.833826	0.32546	-0.425348	0.00275883	0.0197	0.0755	0.1789	0.6027	0.693704	0.561039	1	0.692379	0.753418	0.94408	1.072e-05	6.828e-05	4.17
[K].KEESEESDDDMGFGLFD.[-]	1xOxidation [M11]; 1xTMT6plex [K1]; 1xTMT6plex [N-Term]; 1xPhospho [S7(100)]	0.000537629	0.000105585	1	2	1	1	P02401	P02401 [99-115]	P02401 1xPhospho [S105(100)]	1	2504.05	P02401	60S acidic ribosomal protein P2 [OS=Rattus norvegicus]	Rplp2; LOC100911575	0.833667	-0.112024	-0.398477	-0.0884479	0.0198	0.7989	0.2107	0.9373	0.660599	0.561101	1	0.702366	0.739596	0.68434	7.384e-05	0.0002644	3.91
[KR].AEMADSNRSPR.[S]	1xTMT6plex [N-Term]; 1xPhospho [S9(100)]	0.0168779	0.0016274	2	9	3	4	Q9Z330-1; P13864	Q9Z330-1 [117-127]; P13864 [117-127]	Q9Z330-1 1xPhospho [S125(100)]; P13864 1xPhospho [S125(100)]	1	1542.69	Q9Z330-1	DNA (cytosine-5)-methyltransferase 1 [OS=Rattus norvegicus]	Dnmt1	0.833329	0.00886649	0.0363316	0.239199	0.0199	0.765	0.3809	0.0921	0.69455	0.561233	1	0.588433	0.547276	0.550649	0.0005996	0.006221	3.96
[K].QPAGSGQKPQSR.[K]	1xTMT6plex [K8]; 1xTMT6plex [N-Term]; 1xPhospho [S5(100)]	0.00667544	0.000930136	1	1	1	1	P41777	P41777 [417-428]	P41777 1xPhospho [S421(100)]	0	1778.93	P41777	nucleolar and coiled-body phosphoprotein 1 [OS=Rattus norvegicus]	Nolc1	0.831789	-0.707443	0.0368944	0.0570939	0.0199	0.0404	0.3791	0.427	0.557142	0.561832	1	0.535524	0.547646	0.335381	0.0002594	0.002046	2.67
[K].SANDSTVHSPFTK.[R]	1xTMT6plex [K13]; 1xTMT6plex [N-Term]; 1xPhospho [S/T]	0.00293767	0.000270467	2	5	1	1	Q80X50-5; Q80X50	Q80X50-5 [433-445]; Q80X50 [428-440]		0	1928.95	Q80X50-5	Isoform 5 of Ubiquitin-associated protein 2-like [OS=Mus musculus]	Ubap2l	0.831681	-0.0304467	-0.103486	0.238963	0.02	0.9093	0.9185	0.0925	0.687973	0.561874	1	0.582957	0.603659	0.591053	0.0001619	0.0009818	3.29
[K].ESEPQAAADATEVK.[E]	1xTMT6plex [K14]; 1xTMT6plex [N-Term]; 1xPhospho [T11(100)]	6.22947e-06	7.97536e-05	2	2	1	3	Q05175; Q91XV3	Q05175 [39-52]; Q91XV3 [39-52]	Q05175 1xPhospho [T49(100)]; Q91XV3 1xPhospho [T49(100)]	0	1983.97	Q05175	Brain acid soluble protein 1 [OS=Rattus norvegicus]	Basp1	0.831661	-0.310554	-0.0723699	-0.0550079	0.0201	0.3049	0.786	0.8085	0.682976	0.561882	1	0.70952	0.590786	0.47637	1.072e-05	3.455e-07	3.54
[K].SASNYSQLGTFAPVWDVFK.[T]	1xTMT6plex [K19]; 1xTMT6plex [N-Term]; 3xPhospho [S1(93.5); S6(90.6); T10(90.6)]	0.0735478	0.00514193	1	1	1	1	D3ZYR1	D3ZYR1 [59-77]	D3ZYR1 3xPhospho [S59(93.5); S64(90.6); T68(90.6)]	0	2815.26	D3ZYR1	F-BAR domain only protein 2 [OS=Rattus norvegicus]	Fcho2	0.831416	-0.280953	0.00529059	-0.222885	0.0202	0.3557	0.4807	0.5915	0.538819	0.561977	1	0.628837	0.55992	0.460841	0.001816	0.02094	1.78
[K].SDISPLTPRESSPTYSPGFSDSTSGAK.[E]	1xTMT6plex [K27]; 1xTMT6plex [N-Term]; 2xPhospho [S4(95.6); S/T/Y]	0.00604846	0.000618119	1	1	1	2	P15205	P15205 [1773-1799]	P15205 2xPhospho [S1776(95.6); S/T/Y]	1	3389.56	P15205	microtubule-associated protein 1B [OS=Rattus norvegicus]	Map1b	0.830493	0.0530018	-0.169619	-0.115153	0.0203	0.6165	0.8041	0.9557	0.663867	0.562337	1	0.719027	0.632495	0.656164	0.0002629	0.001911	4.29
[R].DLEMSQK.[V]	1xTMT6plex [K7]; 1xTMT6plex [N-Term]; 1xPhospho [S5(100)]	0.032031	0.00257124	1	1	1	1	Q9CPY3	Q9CPY3 [135-141]	Q9CPY3 1xPhospho [S139(100)]	0	1388.69	Q9CPY3	Sororin [OS=Mus musculus]	Cdca5	0.830209	0.331271	0.169108	0.0216138	0.0204	0.0706	0.1199	0.5384	0.498614	0.562448	1	0.491199	0.500237	0.629359	0.001055	0.00976	2.54
[K].IREVRPSPSK.[T]	1xTMT6plex [K10]; 1xTMT6plex [N-Term]; 1xPhospho [S7(100)]	0.00170815	0.00046153	1	2	1	3	Q62315	Q62315 [325-334]	Q62315 1xPhospho [S331(100)]	1	1706.97	Q62315	Protein Jumonji [OS=Mus musculus]	Jarid2	0.829846	-0.131046	-0.0287305	-0.116607	0.0205	0.7346	0.61	0.95	0.63393	0.562589	1	0.687295	0.573905	0.524072	6.971e-05	0.0003781	2.78
[K].GATAVPQRRSEEDSAVPVAK.[A]	1xTMT6plex [K20]; 1xTMT6plex [N-Term]; 1xPhospho [S10(100)]	0.000705649	7.97536e-05	1	1	1	2	Q5PQQ2	Q5PQQ2 [591-610]	Q5PQQ2 1xPhospho [S600(100)]	2	2606.37	Q5PQQ2	WW domain-binding protein 11 [OS=Rattus norvegicus]	Wbp11; LOC100910115; Wbp11l1	0.829232	-0.251009	-0.349994	0.0565004	0.0206	0.4162	0.2819	0.4292	0.670294	0.562829	1	0.64455	0.717356	0.602801	1.072e-05	0.0001192	2.57
[R].MAPTPIPTRSPSDSSTASTPITEQIER.[A]	1xTMT6plex [N-Term]; 1xPhospho [S10(100)]	4.09797e-05	5.91125e-05	1	2	1	2	Q07266-2	Q07266-2 [328-354]	Q07266-2 1xPhospho [S337(100)]	1	3179.55	Q07266-2	Isoform E1 of Drebrin [OS=Rattus norvegicus]	Dbn1	0.828232	0.0744493	-0.635658	-0.32387	0.0207	0.5408	0.0536	0.3452	0.603047	0.563219	1	0.754823	0.875043	0.921385	4.518e-05	3.946e-05	7.09
[K].DLHDDDEDEEMSETADADSMNIEESNQGSTAGDHLQHK.[S]	1xOxidation [M]; 1xTMT6plex [K38]; 1xTMT6plex [N-Term]; 1xPhospho [S12(98.3)]	4.48991e-12	7.97536e-05	1	1	3	5	P50411	P50411 [164-201]	P50411 1xPhospho [S175(98.3)]	0	4769.96	P50411	Protein phosphatase inhibitor 2 [OS=Rattus norvegicus]	Ppp1r2	0.828232	-0.241307	-0.223589	-0.185863	0.0208	0.4378	0.608	0.7067	0.641987	0.563219	1	0.730258	0.657634	0.556344	1.072e-05	1.035e-14	7.53
[R].ATSGGMSESSSGFSK.[H]	1xTMT6plex [K15]; 1xTMT6plex [N-Term]; 1xPhospho [S3(98.2)]	0.000611534	7.97536e-05	1	3	1	1	Q91ZN7	Q91ZN7 [278-292]	Q91ZN7 1xPhospho [S280(98.2)]	0	1957.9	Q91ZN7	Serine/threonine-protein kinase Chk1 [OS=Rattus norvegicus]	Chek1	0.827448	0.115384	-0.52306	-0.594395	0.0209	0.4209	0.0965	0.0747	0.513319	0.563525	1	0.775029	0.809786	0.877212	1.072e-05	9.899e-05	2.4
[R].QFLLQQASSLNSPGNNDSK.[Q]	1xTMT6plex [K19]; 1xTMT6plex [N-Term]; 1xPhospho [S12(98.3)]	5.86314e-08	7.97536e-05	1	3	2	11	Q9DBY0	Q9DBY0 [81-99]	Q9DBY0 1xPhospho [S92(98.3)]	0	2586.3	Q9DBY0	Forkhead box protein P4 [OS=Mus musculus]	Foxp4	0.826597	0.0820786	-0.368685	-0.0252327	0.021	0.5178	0.2523	0.7028	0.69638	0.563858	1	0.708667	0.728039	0.77066	1.072e-05	1.141e-09	4.85
[K].TAEQNPMEPEGAGEGSPGETEK.[E]	1xOxidation [M7]; 1xTMT6plex [K22]; 1xTMT6plex [N-Term]; 1xPhospho [S16(100)]	3.0424e-06	7.97536e-05	1	1	1	11	Q3MHT4	Q3MHT4 [726-747]	Q3MHT4 1xPhospho [S741(100)]	0	2799.24	Q3MHT4	Speckle targeted PIP5K1A-regulated poly(A) polymerase [OS=Rattus norvegicus]	Tut1	0.826284	-0.523455	-0.366779	-0.00793747	0.0211	0.1006	0.2548	0.6397	0.655105	0.56398	1	0.658719	0.727236	0.50594	1.072e-05	1.439e-07	5.1
[K].DTESSPGSSPPSLTPK.[L]	1xTMT6plex [K16]; 1xTMT6plex [N-Term]; 1xPhospho [T14(100)]	0.000159586	7.97536e-05	1	4	2	2	P00520-1	P00520-1 [799-814]	P00520-1 1xPhospho [T812(100)]	0	2125.05	P00520-1	Tyrosine-protein kinase ABL1 [OS=Mus musculus]	Abl1	0.825011	-0.0434017	-0.0357603	-0.301788	0.0212	0.9584	0.6373	0.3917	0.532174	0.564478	1	0.655995	0.578644	0.561496	1.072e-05	1.856e-05	3.17
[R].NTTSDLQK.[A]	1xTMT6plex [K8]; 1xTMT6plex [N-Term]; 1xPhospho [T3(98.8)]	0.070687	0.00509165	1	1	1	1	Q923W4	Q923W4 [190-197]	Q923W4 1xPhospho [T192(98.8)]	0	1444.74	Q923W4	Hepatoma-derived growth factor-related protein 3 [OS=Rattus norvegicus]	Hdgfrp3; Hdgfl3	0.824039	-0.248539	0.0542753	0.0768424	0.0213	0.421	0.3317	0.3712	0.598791	0.564858	1	0.567732	0.544003	0.457913	0.001789	0.02013	1.81
[R].GLASPDRSGGMGSASEMLAALAVESAGVK.[V]	1xTMT6plex [K29]; 1xTMT6plex [N-Term]; 1xPhospho [S4(99.1)]	5.09503e-05	5.91125e-05	1	3	1	1	Q5QD51-1	Q5QD51-1 [1568-1596]	Q5QD51-1 1xPhospho [S1571(99.1)]	1	3257.63	Q5QD51-1	A-kinase anchor protein 12 [OS=Rattus norvegicus]	Akap12	0.822853	0.0586537	-0.510319	-0.628356	0.0214	0.5958	0.1046	0.0621	0.550075	0.565323	1	0.850308	0.805227	0.838638	4.518e-05	4.807e-05	6.57
[R].RISFSTSDVSKLSPVK.[T]	2xTMT6plex [K11; K16]; 1xTMT6plex [N-Term]; 2xPhospho [S3(98.6); S13(98.6)]	0.000611534	7.97536e-05	1	1	1	1	Q63358	Q63358 [1325-1340]	Q63358 2xPhospho [S1327(98.6); S1337(98.6)]	2	2598.39	Q63358	Unconventional myosin-IXb [OS=Rattus norvegicus]	Myo9b	0.822626	0.00407738	-0.26203	-0.114014	0.0215	0.7834	0.4824	0.9601	0.558894	0.565412	1	0.604855	0.678022	0.679941	1.072e-05	9.93e-05	4.19
[K].DVSDERLSPAKSPSLSPSPPSPIEK.[T]	2xTMT6plex [K11; K25]; 1xTMT6plex [N-Term]; 3xPhospho [S8(98.5); S12(100); S16(97)]	7.55085e-08	7.97536e-05	2	2	5	13	P14873; P15205	P14873 [1240-1264]; P15205 [1236-1260]	P14873 3xPhospho [S1247(98.5); S1251(100); S1255(97)]; P15205 3xPhospho [S1243(98.5); S1247(100); S1251(97)]	2	3547.73	P14873	microtubule-associated protein 1B [OS=Mus musculus]	Map1b; Mtap1b	0.821596	0.198684	-0.624899	-0.275244	0.0216	0.2293	0.0565	0.4508	0.673432	0.565037	0.998624	0.814986	0.871345	1	1.072e-05	1.553e-09	6.97
[R].TYSSSGSSGGSHPSSR.[S]	1xTMT6plex [N-Term]; 1xPhospho [S3(98.5)]	1.06538e-06	7.97536e-05	1	1	2	6	P62484	P62484 [234-249]	P62484 1xPhospho [S236(98.5)]	0	1849.79	P62484	abl interactor 2 [OS=Mus musculus]	Abi2	-1.11416	-0.192441	0.20412	0.00549284	0.0217	0.5563	0.0844	0.593	0.975015	1	0.461959	0.97131	0.868068	0.759667	1.072e-05	3.965e-08	4.1
[R].SPSSPIHEEDEEK.[L]	1xTMT6plex [K13]; 1xTMT6plex [N-Term]; 1xPhospho [S4(100)]	0.00185824	0.00046153	1	1	1	1	Q5XIQ4	Q5XIQ4 [436-448]	Q5XIQ4 1xPhospho [S439(100)]	0	2021.95	Q5XIQ4	E3 ubiquitin-protein ligase MGRN1 [OS=Rattus norvegicus]	Mgrn1	0.819399	0.0447339	0.224437	-0.299585	0.0218	0.6424	0.0691	0.3962	0.473443	0.566678	1	0.58271	0.485036	0.500311	6.971e-05	0.0004234	2.52
[K].LQNSDDEEREQGSDDEK.[L]	1xTMT6plex [K17]; 1xTMT6plex [N-Term]; 2xPhospho [S4(100); S13(100)]	7.16377e-05	7.97536e-05	1	1	1	15	Q641X2	Q641X2 [170-186]	Q641X2 2xPhospho [S173(100); S182(100)]	1	2612.08	Q641X2	RNA polymerase-associated protein LEO1 [OS=Rattus norvegicus]	Leo1	-1.10522	-0.811259	0.184628	-0.326684	0.0219	0.0278	0.1027	0.3398	0.797367	0.911317	0.423609	1	0.801846	0.45696	1.072e-05	6.917e-06	5.12
[R].VPSPDHR.[R]	1xTMT6plex [N-Term]; 1xPhospho [S3(100)]	0.089202	0.00665395	1	1	1	3	Q4FK66-1	Q4FK66-1 [207-213]	Q4FK66-1 1xPhospho [S209(100)]	0	1116.54	Q4FK66-1	Pre-mRNA-splicing factor 38A [OS=Mus musculus]	Prpf38a	-1.10492	0.186986	0.360657	0.0881547	0.022	0.2512	0.0177	0.3418	0.874369	1	0.464927	0.822541	0.77881	0.886584	0.002796	0.04181	2.13
[R].SEESQEK.[E]	1xTMT6plex [K7]; 1xTMT6plex [N-Term]; 1xPhospho [S4(100)]	0.0142735	0.00128835	1	1	2	25	O35314	O35314 [372-378]	O35314 1xPhospho [S375(100)]	0	1374.66	O35314	Secretogranin-1 [OS=Rattus norvegicus]	Chgb	0.818495	-0.672211	-0.326726	-0.0197932	0.0221	0.0473	0.3252	0.6829	0.692319	0.567033	1	0.701883	0.711153	0.44628	0.0004782	0.004516	2.17
[K].ENQRSPVR.[V]	1xTMT6plex [N-Term]; 1xPhospho [S5(100)]	0.01328	0.00128835	1	2	1	29	O55035	O55035 [391-398]	O55035 1xPhospho [S395(100)]	1	1294.65	O55035	peptidyl-prolyl cis-trans isomerase g [OS=Rattus norvegicus]	Ppig	-1.09585	-0.839296	-0.014563	-0.115538	0.0222	0.0243	0.5572	0.9539	0.90577	0.989956	0.46316	0.981292	1	0.558916	0.0004581	0.004213	1.98
[K].KADIDQSPVSK.[T]	2xTMT6plex [K1; K11]; 1xTMT6plex [N-Term]; 1xPhospho [S7(100)]	1.72606e-06	7.97536e-05	1	1	1	71	O55035	O55035 [679-689]	O55035 1xPhospho [S685(100)]	1	1955.08	O55035	peptidyl-prolyl cis-trans isomerase g [OS=Rattus norvegicus]	Ppig	-1.1026	-0.73316	0.0280797	0.076456	0.0222	0.0372	0.4038	0.3723	0.951993	1	0.465677	0.902856	0.980725	0.589989	1.072e-05	7.199e-08	5.08
[K].LEQDDETSEK.[S]	1xTMT6plex [K10]; 1xTMT6plex [N-Term]; 1xPhospho [S8(99.3)]	0.000171091	7.97536e-05	1	3	3	6	Q8C827	Q8C827 [78-87]	Q8C827 1xPhospho [S85(99.3)]	0	1731.81	Q8C827	zinc finger protein 62 [OS=Mus musculus]	Zfp62	0.816411	-0.254015	0.27346	0.227184	0.0223	0.4093	0.043	0.103	0.620702	0.567853	1	0.530266	0.469803	0.393958	1.072e-05	2.019e-05	3.85
[R].RESINDR.[A]	1xTMT6plex [N-Term]; 1xPhospho [S3(100)]	0.00737054	0.000992769	1	1	1	2	Q9Z277	Q9Z277 [187-193]	Q9Z277 1xPhospho [S189(100)]	1	1198.58	Q9Z277	Tyrosine-protein kinase BAZ1B [OS=Mus musculus]	Baz1b	-1.09039	-0.345962	-0.0739344	-0.00358747	0.0224	0.2514	0.7932	0.6255	0.997516	0.927961	0.435802	1	0.976757	0.768496	0.0002748	0.002278	2.57
[KR].AEMADSNRSPR.[S]	1xOxidation [M3]; 1xTMT6plex [N-Term]; 1xPhospho [S]	0.0170081	0.00145239	1	9	3	17	Q9Z330-1	Q9Z330-1 [117-127]		1	1558.69	Q9Z330-1	DNA (cytosine-5)-methyltransferase 1 [OS=Rattus norvegicus]	Dnmt1	0.814253	0.369098	-0.157306	0.122327	0.0225	0.051	0.8546	0.2613	0.685737	0.568703	1	0.62999	0.634219	0.819122	0.0005456	0.005358	2.28
[K].FPDRLADDEGDSDSESVGQSR.[G]	1xTMT6plex [N-Term]; 3xPhospho [S12(100); S14(100); S16(100)]	1.381e-05	7.97536e-05	1	2	1	1	Q9Z277	Q9Z277 [1453-1473]	Q9Z277 3xPhospho [S1464(100); S1466(100); S1468(100)]	1	2751.04	Q9Z277	Tyrosine-protein kinase BAZ1B [OS=Mus musculus]	Baz1b	0.814122	-0.17918	-0.439186	-0.25829	0.0226	0.5945	0.1651	0.4954	0.684431	0.568754	1	0.818621	0.77114	0.681074	1.072e-05	9.202e-07	5.31
[R].GQPASPTAHMVSHSHSPSVVS.[-]	1xTMT6plex [N-Term]; 2xPhospho [S5(97.7); S/T]	0.036984	0.00271684	1	1	2	3	Q80V24	Q80V24 [267-287]	Q80V24 2xPhospho [S271(97.7); S/T]	0	2489.09	Q80V24	Transcription cofactor vestigial-like protein 4 [OS=Mus musculus]	Vgll4	0.81406	-0.501264	-0.0162519	-0.068595	0.0227	0.1114	0.5646	0.8609	0.516539	0.568779	1	0.541692	0.575223	0.406387	0.001134	0.01115	2.08
[K].STGGTPPDSSLVTYELHSRPEQDK.[F]	1xTMT6plex [K24]; 1xTMT6plex [N-Term]; 1xPhospho [T5(100)]	0.000152613	5.91125e-05	1	1	1	1	Q6AYH5	Q6AYH5 [195-218]	Q6AYH5 1xPhospho [T199(100)]	0	3139.53	Q6AYH5	dynactin subunit 2 [OS=Rattus norvegicus]	Dctn2	0.813589	-0.52909	0.0573405	-0.363766	0.0228	0.0967	0.3229	0.2752	0.478455	0.568965	1	0.615666	0.546794	0.378924	5.611e-05	0.0001085	4.73
[K].VAVVRTPPKSPSASK.[S]	2xTMT6plex [K9; K15]; 1xTMT6plex [N-Term]; 2xPhospho [T6(100); S10(98.5)]	0.114257	0.00875999	6	14	1	2	P19332-4; P10637-3; P19332-1; P19332-6; P19332-3; P10637-1	P19332-4 [283-297]; P10637-3 [157-171]; P19332-1 [537-551]; P19332-6 [159-173]; P19332-3 [188-202]; P10637-1 [518-532]	P19332-4 2xPhospho [T288(100); S292(98.5)]; P10637-3 2xPhospho [T162(100); S166(98.5)]; P19332-1 2xPhospho [T542(100); S546(98.5)]; P19332-6 2xPhospho [T164(100); S168(98.5)]; P19332-3 2xPhospho [T193(100); S197(98.5)]; P10637-1 2xPhospho [T523(100); S527(98.5)]	2	2371.31	P19332-4	Isoform Tau-D of Microtubule-associated protein tau [OS=Rattus norvegicus]	Mapt	0.811344	0.0536322	-0.107325	-0.0975179	0.0229	0.6148	0.9352	0.9745	0.589815	0.569851	1	0.631061	0.61386	0.637109	0.00363	0.056	1.98
[R].AGSLESDGCPK.[E]	1xCarbamidomethyl [C9]; 1xTMT6plex [K11]; 1xTMT6plex [N-Term]; 1xPhospho [S3(100)]	0.000210751	7.97536e-05	1	2	1	9	Q00566-2	Q00566-2 [447-457]	Q00566-2 1xPhospho [S449(100)]	0	1658.79	Q00566-2	Isoform B of Methyl-CpG-binding protein 2 [OS=Rattus norvegicus]	Mecp2	0.810027	0.00119376	-0.416654	-0.101779	0.023	0.7939	0.1885	0.9914	0.634058	0.570371	1	0.680405	0.761348	0.761978	1.072e-05	2.614e-05	3.48
[R].AADSGERPLATSPPGTVK.[S]	1xTMT6plex [K18]; 1xTMT6plex [N-Term]; 1xPhospho [S12(98.9)]	1.0775e-05	7.97536e-05	1	3	2	5	O88286	O88286 [1539-1556]	O88286 1xPhospho [S1550(98.9)]	0	2292.2	O88286	Protein Wiz [OS=Mus musculus]	Wiz	0.808051	-0.165931	-0.0302035	0.483116	0.0231	0.6323	0.6155	0.0094	0.6903	0.571153	1	0.493862	0.583236	0.519869	1.072e-05	6.789e-07	3.12
[R].SRSVSGASTGLSSSPLSSPR.[S]	1xTMT6plex [N-Term]; 2xPhospho [S3(99.5); S/T]	0.053993	0.00412092	1	2	1	1	B2DD29	B2DD29 [430-449]	B2DD29 2xPhospho [S432(99.5); S/T]	1	2309.07	B2DD29	Serine/threonine-protein kinase BRSK1 [OS=Rattus norvegicus]	Brsk1	0.807735	0.100123	-0.00661546	-0.151079	0.0232	0.4665	0.527	0.8214	0.636531	0.571278	1	0.706804	0.573903	0.615147	0.00148	0.0157	3.52
[K].QNSDDEDRPQVSDEEK.[M]	1xTMT6plex [K16]; 1xTMT6plex [N-Term]; 1xPhospho [S3(100)]	2.52594e-05	7.97536e-05	1	1	1	5	Q641X2	Q641X2 [239-254]	Q641X2 1xPhospho [S241(100)]	0	2429.09	Q641X2	RNA polymerase-associated protein LEO1 [OS=Rattus norvegicus]	Leo1	-1.0613	-0.0685873	0.45931	0.0909258	0.0233	0.9515	0.0072	0.3353	0.904096	1	0.479201	0.848873	0.727334	0.693565	1.072e-05	1.928e-06	4.02
[K].LDFTGNSTGHK.[R]	1xTMT6plex [K11]; 1xTMT6plex [N-Term]; 2xPhospho [S7(100); T8(100)]	0.00418977	0.000769263	1	1	1	6	E9PVX6	E9PVX6 [1300-1310]	E9PVX6 2xPhospho [S1306(100); T1307(100)]	0	1794.82	E9PVX6	Proliferation marker protein Ki-67 [OS=Mus musculus]	Mki67	0.806191	0.235097	-0.0383199	0.0779061	0.0234	0.1711	0.6474	0.3675	0.652608	0.57189	1	0.618301	0.587283	0.691224	0.000151	0.001194	3.5
[R].SSPETLISDLLMRESTENAPR.[T]	1xTMT6plex [N-Term]; 1xPhospho [S/T]	0.00167583	0.000170064	1	1	1	1	P07808	P07808 [69-89]		1	2655.29	P07808	Pro-neuropeptide Y [OS=Rattus norvegicus]	Npy; LOC100912228	0.804345	-0.0816411	-0.177445	0.115666	0.0235	0.9052	0.7762	0.2766	0.658645	0.572622	1	0.6079	0.647566	0.611939	0.0001248	0.0006256	4.45
[R].LSYAGGRPPSYAGSPVHHAAER.[L]	1xTMT6plex [N-Term]; 2xPhospho [S2(100); S14(100)]	0.0299257	0.00252435	1	5	1	1	Q9QXY2-1	Q9QXY2-1 [365-386]	Q9QXY2-1 2xPhospho [S366(100); S378(100)]	0	2669.22	Q9QXY2-1	SRC kinase signaling inhibitor 1 [OS=Rattus norvegicus]	Srcin1	0.804166	-0.174387	-0.369014	-0.424183	0.0236	0.61	0.2515	0.1942	0.621412	0.572693	1	0.833819	0.739616	0.655406	0.001012	0.009141	2.75
[K].TDHGAEIVYKSPVVSGDTSPR.[H]	1xTMT6plex [K10]; 1xTMT6plex [N-Term]; 2xPhospho [S11(100); S15(100)]	7.2555e-05	5.91125e-05	6	14	2	6	P19332-4; P10637-3; P19332-1; P19332-6; P19332-3; P10637-1	P19332-4 [443-463]; P10637-3 [286-306]; P19332-1 [697-717]; P19332-6 [319-339]; P19332-3 [348-368]; P10637-1 [678-698]	P19332-4 2xPhospho [S453(100); S457(100)]; P10637-3 2xPhospho [S296(100); S300(100)]; P19332-1 2xPhospho [S707(100); S711(100)]; P19332-6 2xPhospho [S329(100); S333(100)]; P19332-3 2xPhospho [S358(100); S362(100)]; P10637-1 2xPhospho [S688(100); S692(100)]	1	2833.36	P19332-4	Isoform Tau-D of Microtubule-associated protein tau [OS=Rattus norvegicus]	Mapt	0.803141	0.219534	-0.159937	-0.142686	0.0237	0.195	0.8426	0.8503	0.611321	0.5731	1	0.674873	0.64029	0.745526	5.611e-05	6.421e-05	5.05
[K].LASDDRPSPPRGLVAAYSGESDSEEEQERGGPER.[E]	1xTMT6plex [N-Term]; 3xPhospho [S8(99.9); S21(96); S23(99.9)]	4.83902e-05	7.97536e-05	2	4	1	1	Q99KG3; P70501	Q99KG3 [716-749]; P70501 [638-671]	Q99KG3 3xPhospho [S723(99.9); S736(96); S738(99.9)]; P70501 3xPhospho [S645(99.9); S658(96); S660(99.9)]	2	4112.75	Q99KG3	RNA-binding protein 10 [OS=Mus musculus]	Rbm10	0.802775	-0.338214	-0.228946	0.22999	0.0238	0.2613	0.5909	0.101	0.687076	0.573245	1	0.585829	0.671831	0.531432	1.072e-05	4.269e-06	3.77
[K].SGERSGYSSPGSPGTPGSR.[S]	1xTMT6plex [N-Term]; 2xPhospho [S/Y/T]	0.00620893	0.00065888	6	14	1	1	P19332-4; P10637-3; P19332-1; P19332-6; P19332-3; P10637-1	P19332-4 [248-266]; P10637-3 [122-140]; P19332-1 [502-520]; P19332-6 [124-142]; P19332-3 [153-171]; P10637-1 [483-501]		1	2211.93	P19332-4	Isoform Tau-D of Microtubule-associated protein tau [OS=Rattus norvegicus]	Mapt	0.80201	0.331029	-0.120571	-0.432003	0.0239	0.0707	0.9931	0.1862	0.54069	0.573549	1	0.729447	0.623543	0.784361	0.0002689	0.001964	2.89
[R].DGGASPRSPAR.[W]	1xTMT6plex [N-Term]; 1xPhospho [S8(100)]	0.00159011	0.00046153	1	1	1	11	P97440	P97440 [16-26]	P97440 1xPhospho [S23(100)]	1	1379.66	P97440	Histone RNA hairpin-binding protein [OS=Mus musculus]	Slbp	0.801496	-0.390533	-0.100044	-0.201089	0.024	0.1985	0.9025	0.6591	0.626454	0.573754	1	0.72015	0.614953	0.469115	6.971e-05	0.0003449	2.48
[R].SVDALDDINRPGSTESGR.[S]	1xTMT6plex [N-Term]; 1xPhospho [T14(99.2)]	8.64963e-08	7.97536e-05	1	6	2	15	Q9WU74-1	Q9WU74-1 [436-453]	Q9WU74-1 1xPhospho [T449(99.2)]	0	2198.03	Q9WU74-1	Lipolysis-stimulated lipoprotein receptor [OS=Rattus norvegicus]	Lsr	0.801326	-0.428552	-0.801461	-0.812724	0.0241	0.1619	0.0234	0.0275	0.569306	0.519532	0.90539	1	0.905474	0.672774	1.072e-05	1.828e-09	6.31
[R].RPSTNDHSLDEGVGLVHSNTATEHIPSPAK.[K]	1xTMT6plex [K30]; 1xTMT6plex [N-Term]; 1xPhospho [S27(100)]	6.67589e-06	3.88506e-05	1	1	1	7	P17425	P17425 [469-498]	P17425 1xPhospho [S495(100)]	0	3704.84	P17425	hydroxymethylglutaryl-CoA synthase, cytoplasmic [OS=Rattus norvegicus]	Hmgcs1	0.799599	0.41586	0.0683617	-0.124524	0.0242	0.0344	0.2948	0.9167	0.597552	0.574509	1	0.651421	0.547921	0.730978	1.413e-05	7.365e-06	6.32
[K].ETQTPLATHQSEEDEEDEEMVEPK.[VI]	1xOxidation [M20]; 1xTMT6plex [K24]; 1xTMT6plex [N-Term]; 1xPhospho [S11(100)]	2.47613e-08	7.97536e-05	2	5	3	31	O88485; Q63100	O88485 [152-175]; Q63100 [167-190]	O88485 1xPhospho [S162(100)]; Q63100 1xPhospho [S177(100)]	0	3355.48	O88485	cytoplasmic dynein 1 intermediate chain 1 [OS=Mus musculus]	Dync1i1	0.799378	-0.258206	-0.0242399	0.127708	0.0243	0.4011	0.5936	0.251	0.606542	0.574597	1	0.555158	0.584332	0.488576	1.072e-05	3.965e-10	4.9
[K].ALEEEEMEQVGQAEHLEEEHDPSPEEQDREWR.[D]	1xTMT6plex [N-Term]; 1xPhospho [S23(100)]	5.7274e-08	7.97536e-05	1	1	1	2	Q5BJK8	Q5BJK8 [306-337]	Q5BJK8 1xPhospho [S328(100)]	1	4199.8	Q5BJK8	Golgi integral membrane protein 4 [OS=Rattus norvegicus]	Golim4	0.799201	-0.0101457	-0.464403	-0.250968	0.0244	0.833	0.1404	0.5141	0.716616	0.574668	1	0.852776	0.792895	0.787339	1.072e-05	1.109e-09	4.39
[K].NADLHSGTELTLDNSMTPPSDPALPLETK.[V]	1xTMT6plex [K29]; 1xTMT6plex [N-Term]; 1xPhospho [T8(98.5)]	0.00101211	7.97536e-05	1	2	2	2	Q5M7W5-1	Q5M7W5-1 [530-558]	Q5M7W5-1 1xPhospho [T537(98.5)]	0	3602.77	Q5M7W5-1	Microtubule-associated protein 4 [OS=Rattus norvegicus]	Map4	0.798567	-0.0584677	-0.0673618	0.0897051	0.0245	0.9879	0.7662	0.3382	0.658231	0.57492	1	0.618549	0.6024	0.578475	1.072e-05	0.0001902	2.71
[R].TSSISGPLSPAYTGQVPYNYNQLEGR.[F]	1xTMT6plex [N-Term]; 1xPhospho [S3(96.6)]	0.000593579	0.000105585	1	1	1	1	Q62261-2	Q62261-2 [6-31]	Q62261-2 1xPhospho [S8(96.6)]	0	3108.49	Q62261-2	Isoform 2 of Spectrin beta chain, non-erythrocytic 1 [OS=Mus musculus]	Spnb2; Sptbn1	0.79758	-0.48487	-0.232076	-0.16356	0.0246	0.1203	0.581	0.7782	0.677927	0.575313	1	0.75931	0.675719	0.482843	8.188e-05	0.0002848	6.37
[K].IEDVGSDEEDDSGK.[D]	1xTMT6plex [K14]; 1xTMT6plex [N-Term]; 2xPhospho [S6(100); S12(100)]	0.0578248	0.00455896	1	1	1	2	P34058	P34058 [250-263]	P34058 2xPhospho [S255(100); S261(100)]	0	2112.87	P34058	Heat shock protein HSP 90-beta [OS=Rattus norvegicus]	Hsp90ab1	-1.02633	0.0172542	0.0718511	-0.41815	0.0246	0.7339	0.2868	0.2013	0.748384	0.886742	0.435352	1	0.843661	0.853811	0.001918	0.02587	1.3
[K].AYHEQLTVAEITNACFEPANQMVK.[C]	1xCarbamidomethyl [C15]; 1xTMT6plex [K24]; 1xTMT6plex [N-Term]; 1xPhospho [T/Y]	8.35787e-05	5.91125e-05	1	2	2	4	Q6AYZ1	Q6AYZ1 [281-304]		0	3302.6	Q6AYZ1	Tubulin alpha-1C chain [OS=Rattus norvegicus]	Tuba1c; LOC100909441	0.796662	-0.237465	-0.461014	-0.0473303	0.0247	0.4476	0.1437	0.7811	0.710896	0.575679	1	0.734605	0.792428	0.672165	5.611e-05	7.131e-05	4.05
[K].SPSPPPDGSPAATPEIR.[V]	1xTMT6plex [N-Term]; 3xPhospho [S1(100); S3(100); S9(100)]	0.00718904	0.000930136	1	7	1	1	O08839	O08839 [296-312]	O08839 3xPhospho [S296(100); S298(100); S304(100)]	0	2144.89	O08839	Myc box-dependent-interacting protein 1 [OS=Rattus norvegicus]	Bin1	0.795999	-0.198253	-0.640016	-0.410491	0.0248	0.539	0.0528	0.211	0.674513	0.575944	1	0.89652	0.897521	0.782284	0.0002665	0.002222	3.32
[R].RSSDPALTGLSTSVSDNNFSSEEPSRK.[N]	1xTMT6plex [K27]; 1xTMT6plex [N-Term]; 1xPhospho [S3(99.2)]	5.51818e-14	7.97536e-05	1	7	2	8	Q9Z340-1	Q9Z340-1 [142-168]	Q9Z340-1 1xPhospho [S144(99.2)]	2	3406.65	Q9Z340-1	Partitioning defective 3 homolog [OS=Rattus norvegicus]	Pard3	0.794811	0.0279078	-0.166818	-0.0217229	0.0249	0.6994	0.8151	0.6898	0.676318	0.576419	1	0.686579	0.647076	0.659715	1.072e-05	4.701e-17	9.54
[K].RHHGTPTSAK.[K]	1xTMT6plex [K10]; 1xTMT6plex [N-Term]; 1xPhospho [T5(100)]	0.0081209	0.000821202	1	1	1	1	Q91Z96-1	Q91Z96-1 [977-986]	Q91Z96-1 1xPhospho [T981(100)]	1	1629.86	Q91Z96-1	BMP-2-inducible protein kinase [OS=Mus musculus]	Bmp2k	-1.01493	-0.293969	0.23965	0.199819	0.025	0.3329	0.0609	0.1348	0.954657	1	0.494851	0.831182	0.846951	0.690819	0.0003145	0.002612	2.57
[K].DVSDERLSPAKSPSLSPSPPSPIEK.[T]	2xTMT6plex [K11; K25]; 1xTMT6plex [N-Term]; 2xPhospho [S8(100); S12(98.6)]	3.22629e-07	7.97536e-05	2	2	1	2	P14873; P15205	P14873 [1240-1264]; P15205 [1236-1260]	P14873 2xPhospho [S1247(100); S1251(98.6)]; P15205 2xPhospho [S1243(100); S1247(98.6)]	2	3467.77	P14873	microtubule-associated protein 1B [OS=Mus musculus]	Map1b; Mtap1b	0.794157	0.280739	-0.471921	-0.101615	0.0251	0.1153	0.1338	0.9908	0.626668	0.57668	1	0.672398	0.79983	0.971647	1.072e-05	9.177e-09	5.36
[K].QERLSPEPVAHR.[R]	1xTMT6plex [N-Term]; 1xPhospho [S5(100)]	0.00522566	0.000470313	1	2	1	1	Q5M9G6	Q5M9G6 [29-40]	Q5M9G6 1xPhospho [S33(100)]	1	1727.88	Q5M9G6	Smad nuclear interacting protein 1 [OS=Rattus norvegicus]	Snip1; LOC100912429; NEWGENE_1359268	0.791886	-0.0790639	0.00271381	-0.00432622	0.0252	0.9151	0.4899	0.6288	0.656352	0.577588	1	0.658323	0.576503	0.545759	0.0002277	0.001654	3.17
[R].QASQAGPGPR.[T]	1xTMT6plex [N-Term]; 1xPhospho [S3(100)]	0.00170815	0.00046153	1	5	1	5	P09951-2	P09951-2 [601-610]	P09951-2 1xPhospho [S603(100)]	0	1277.62	P09951-2	Isoform IB of Synapsin-1 [OS=Rattus norvegicus]	Syn1	-1.00145	0.0247177	0.295331	0.043367	0.0253	0.7108	0.0349	0.4688	0.851446	1	0.499498	0.826233	0.814885	0.828967	6.971e-05	0.0003797	3.16
[R].HHSSPK.[R]	1xTMT6plex [K6]; 1xTMT6plex [N-Term]; 1xPhospho [S4(100)]	0.0776869	0.00597461	1	2	1	1	Q3SWS9	Q3SWS9 [256-261]	Q3SWS9 1xPhospho [S259(100)]	0	1230.64	Q3SWS9	Janus kinase and microtubule-interacting protein 1 [OS=Rattus norvegicus]	Jakmip1	0.789829	0.444802	-0.00428311	0.234928	0.0254	0.0259	0.5187	0.0971	0.702174	0.578413	1	0.596657	0.580133	0.789634	0.00248	0.03576	1.46
[K].AKEEQELQDIQSR.[S]	1xTMT6plex [K2]; 1xTMT6plex [N-Term]; 1xPhospho [S12(100)]	0.000141429	7.97536e-05	1	3	1	3	P35803	P35803 [307-319]	P35803 1xPhospho [S318(100)]	1	2112.07	P35803	Neuronal membrane glycoprotein M6-b [OS=Mus musculus]	Gpm6b	0.789478	-0.370995	-0.330396	-0.489424	0.0255	0.2215	0.3183	0.1346	0.549329	0.578553	1	0.771194	0.727449	0.562499	1.072e-05	1.599e-05	3.74
[R].GAATPGQK.[G]	1xTMT6plex [K8]; 1xTMT6plex [N-Term]; 1xPhospho [T4(100)]	0.0732006	0.0057575	4	8	1	2	P19332-4; P19332-1; P19332-6; P19332-3	P19332-4 [213-220]; P19332-1 [467-474]; P19332-6 [89-96]; P19332-3 [118-125]	P19332-4 1xPhospho [T216(100)]; P19332-1 1xPhospho [T470(100)]; P19332-6 1xPhospho [T92(100)]; P19332-3 1xPhospho [T121(100)]	0	1267.68	P19332-4	Isoform Tau-D of Microtubule-associated protein tau [OS=Rattus norvegicus]	Mapt	-0.997291	-0.769686	-0.144492	-0.270705	0.0256	0.0324	0.9063	0.4609	0.828915	0.816341	0.408938	1	0.902336	0.529261	0.002363	0.03341	1.3
[K].RRVSGPDPKPGSNCSSAQSVLSEVSSVPTNGMAK.[N]	1xCarbamidomethyl [C14]; 2xTMT6plex [K9; K34]; 1xTMT6plex [N-Term]; 1xPhospho [S4(100)]	0.00908443	0.000932327	1	1	1	1	Q5U300	Q5U300 [10-43]	Q5U300 1xPhospho [S13(100)]	2	4254.16	Q5U300	Ubiquitin-like modifier-activating enzyme 1 [OS=Rattus norvegicus]	Uba1	0.78891	-0.325866	-0.263645	-0.121301	0.0257	0.2797	0.4781	0.9306	0.607957	0.578781	1	0.661284	0.694832	0.55435	0.0003412	0.002962	3.39
[K].REAAANTNRPSPGGHER.[K]	1xTMT6plex [N-Term]; 1xPhospho [S11(100)]	4.29348e-07	7.97536e-05	1	2	2	8	O54842	O54842 [48-64]	O54842 1xPhospho [S58(100)]	1	2129.02	O54842	Nuclear protein 1 [OS=Rattus norvegicus]	Nupr1	-0.995515	-0.382974	0.272005	-0.0649898	0.0258	0.208	0.0441	0.8457	0.841232	1	0.501557	0.879994	0.828168	0.635085	1.072e-05	1.308e-08	4.29
[R].AHSRDSSDSADGRATPSENLVPSSAR.[V]	1xTMT6plex [N-Term]; 2xPhospho [S6(96.1); S9(97.9)]	0.0223792	0.00188966	1	3	1	1	Q5XI29	Q5XI29 [180-205]	Q5XI29 2xPhospho [S185(96.1); S188(97.9)]	2	3059.34	Q5XI29	Cleavage and polyadenylation specificity factor subunit 7 [OS=Rattus norvegicus]	Cpsf7	0.788646	-0.0605452	-0.1378	-0.248356	0.0259	0.9801	0.9358	0.521	0.544849	0.578887	1	0.6472	0.636907	0.610731	0.0007527	0.006962	2.52
[K].VQPEIEELDPSPSMPGQQVLDK.[H]	1xTMT6plex [K22]; 1xTMT6plex [N-Term]; 1xPhospho [S]	0.00281778	0.000587017	1	1	1	1	P47861	P47861 [85-106]		0	2974.49	P47861	Synaptotagmin-5 [OS=Rattus norvegicus]	Syt5	0.78749	-0.0884916	-0.494643	-0.491702	0.026	0.8814	0.1151	0.1327	0.618996	0.579351	1	0.870372	0.81629	0.767725	0.0001035	0.0007294	2.35
[K].HIPAALPVSGTLSSSNPDLLQSHHR.[I]	1xTMT6plex [N-Term]; 1xPhospho [S/T]	0.000251344	7.11143e-05	1	2	1	2	F1M386	F1M386 [571-595]		0	2943.5	F1M386	rap guanine nucleotide exchange factor 2 [OS=Rattus norvegicus]	Rapgef2	0.787363	-0.346202	-0.085537	0.0399276	0.0261	0.2513	0.8409	0.48	0.675141	0.579402	1	0.656713	0.614794	0.483629	5.646e-05	0.0001532	4.3
[K].EKPQALVTSAATPPPAGSGIK.[R]	2xTMT6plex [K2; K21]; 1xTMT6plex [N-Term]; 1xPhospho [T12(100)]	1.31969e-05	3.88506e-05	1	1	3	3	Q75UQ2	Q75UQ2 [195-215]	Q75UQ2 1xPhospho [T206(100)]	0	2787.56	Q75UQ2	Craniofacial development protein 1 [OS=Rattus norvegicus]	Cfdp1	0.787239	-0.124258	-0.285548	-0.12491	0.0262	0.7569	0.4158	0.9144	0.706152	0.579452	1	0.770016	0.706278	0.647993	1.413e-05	1.367e-05	6.79
[R].YSIVSSEEDGMK.[L]	1xTMT6plex [K12]; 1xTMT6plex [N-Term]; 1xPhospho [S5(98.9)]	0.00840639	0.00104516	1	2	1	1	Q64273	Q64273 [9-20]	Q64273 1xPhospho [S13(98.9)]	0	1882.89	Q64273	Inward rectifier potassium channel 2 [OS=Rattus norvegicus]	Kcnj2	0.786339	0.0348682	-1.22655	-1.21381	0.0263	0.6756	0.0053	0.0068	0.431128	0.369992	0.638123	1	0.865806	0.886987	0.0003191	0.002622	2.55
[K].AQLEPVASPAK.[K]	1xTMT6plex [K11]; 1xTMT6plex [N-Term]; 1xPhospho [S8(100)]	0.0176207	0.0017343	2	20	1	1	P30427-4; Q9QXS1-1	P30427-4 [1302-1312]; Q9QXS1-1 [1436-1446]	P30427-4 1xPhospho [S1309(100)]; Q9QXS1-1 1xPhospho [S1443(100)]	0	1648.91	P30427-4	Isoform 4 of Plectin [OS=Rattus norvegicus]		0.786217	0.0733764	0.0451177	0.156677	0.0264	0.5445	0.3566	0.1967	0.632191	0.579863	1	0.567131	0.562009	0.591333	0.000632	0.006522	3.27
[K].LQNNDSAGK.[A]	1xTMT6plex [K9]; 1xTMT6plex [N-Term]; 1xPhospho [S6(100)]	0.0234732	0.00193691	1	1	1	2	Q8VE97	Q8VE97 [278-286]	Q8VE97 1xPhospho [S283(100)]	0	1484.75	Q8VE97	Serine/arginine-rich splicing factor 4 [OS=Mus musculus]	Srsf4	0.785981	-0.973465	-0.579725	-0.175579	0.0265	0.0162	0.0698	0.7384	0.67326	0.579957	1	0.760392	0.866784	0.441437	0.0007858	0.007284	1.92
[K].QSTETMVSGQTSDKPSRDPETPQSSGSK.[R]	2xTMT6plex [K14; K28]; 1xTMT6plex [N-Term]; 2xPhospho [T21(97.4); S24(97.3)]	2.0052e-06	7.97536e-05	1	1	1	2	Q68FW2	Q68FW2 [163-190]	Q68FW2 2xPhospho [T183(97.4); S186(97.3)]	1	3799.77	Q68FW2	Cell division cycle-associated protein 3 [OS=Rattus norvegicus]	Cdca3	0.78461	0.0724012	0.109331	-0.00571442	0.0266	0.5487	0.2103	0.6332	0.621509	0.580509	1	0.623975	0.538142	0.565838	1.072e-05	8.603e-08	5.43
[R].EALRVSEPK.[IA]	1xTMT6plex [K9]; 1xTMT6plex [N-Term]; 1xPhospho [S6(100)]	0.0674936	0.00479553	2	3	1	2	Q6PGB8; Q91ZW3	Q6PGB8 [757-765]; Q91ZW3 [749-757]	Q6PGB8 1xPhospho [S762(100)]; Q91ZW3 1xPhospho [S754(100)]	1	1566.87	Q6PGB8	Probable global transcription activator SNF2L1 [OS=Mus musculus]	Smarca1	0.784337	-0.371253	-0.129903	-0.0127778	0.0267	0.2213	0.9716	0.659	0.555165	0.580619	1	0.560104	0.635325	0.491176	0.001701	0.01931	1.84
[R].AQSLPPSPENAELQAIPGSQTR.[L]	1xTMT6plex [N-Term]; 2xPhospho [S3(100); S7(100)]	0.040153	0.00292753	1	2	1	1	Q32NY4-1	Q32NY4-1 [661-682]	Q32NY4-1 2xPhospho [S663(100); S667(100)]	0	2680.26	Q32NY4-1	Metal transporter CNNM3 [OS=Mus musculus]	Cnnm3	0.783322	-0.419422	-0.203822	-0.171111	0.0268	0.1701	0.6767	0.752	0.601989	0.581027	1	0.677795	0.669196	0.500374	0.001202	0.01196	2.34
[K].LAMDTYNGPPPGPGPGPALPAHSSPGLPTTTLSPSK.[V]	1xTMT6plex [K36]; 1xTMT6plex [N-Term]; 1xPhospho [S33(100)]	4.04862e-06	7.97536e-05	1	2	1	1	P15257	P15257 [281-316]	P15257 1xPhospho [S313(100)]	0	4019.04	P15257	Hepatocyte nuclear factor 1-alpha [OS=Rattus norvegicus]	Hnf1a	0.781862	-0.00550947	-0.633873	-0.525423	0.0269	0.818	0.0542	0.1094	0.621657	0.581616	1	0.894786	0.902508	0.899068	1.072e-05	2.042e-07	6.61
[K].QDAGFGSPQRQPEPHPGSLQLHQDLGLDSPAGQTESNPESPQR.[E]	1xTMT6plex [N-Term]; 1xPhospho [S7(100)]	1.81758e-08	7.97536e-05	1	1	2	3	Q5XIB5	Q5XIB5 [75-117]	Q5XIB5 1xPhospho [S81(100)]	1	4899.29	Q5XIB5	Coiled-coil domain-containing protein 86 [OS=Rattus norvegicus]	Ccdc86	0.781625	-0.063309	-0.623755	-0.332692	0.0269	0.9721	0.0568	0.3274	0.650149	0.581711	1	0.818772	0.896348	0.857864	1.072e-05	2.716e-10	7.03
[K].AASSANLLLR.[S]	1xTMT6plex [N-Term]; 1xPhospho [S]	0.000443531	7.97536e-05	1	1	1	1	Q8VC03	Q8VC03 [175-184]		0	1324.72	Q8VC03	Echinoderm microtubule-associated protein-like 3 [OS=Mus musculus]	Eml3	-0.970841	-0.306498	0.27229	0.0879754	0.027	0.3119	0.0439	0.342	0.888641	1	0.510208	0.836071	0.828004	0.669526	1.072e-05	6.613e-05	3.51
[K].RSLTSSDDAESSEPERK.[R]	1xTMT6plex [K17]; 1xTMT6plex [N-Term]; 1xPhospho [S/T]	1.37455e-05	7.97536e-05	1	3	2	10	E9Q6J5	E9Q6J5 [2887-2903]		2	2432.17	E9Q6J5	Biorientation of chromosomes in cell division protein 1-like 1 [OS=Mus musculus]	Bod1l	0.780917	-0.159074	-0.320926	-0.274944	0.0271	0.6526	0.3365	0.4514	0.646069	0.581997	1	0.781709	0.726991	0.651093	1.072e-05	9.13e-07	3.78
[R].RQETENKYETDLSK.[D]	2xTMT6plex [K7; K14]; 1xTMT6plex [N-Term]; 1xPhospho [T4(100)]	0.000503685	7.97536e-05	1	7	1	1	Q9QX74-2	Q9QX74-2 [896-909]	Q9QX74-2 1xPhospho [T899(100)]	2	2508.3	Q9QX74-2	Isoform 2 of SH3 and multiple ankyrin repeat domains protein 2 [OS=Rattus norvegicus]	Shank2	0.780017	-0.337908	0.295469	0.272912	0.0272	0.2615	0.0348	0.0665	0.54304	0.58236	1	0.449446	0.474511	0.375427	1.072e-05	7.769e-05	2.82
[K].EESTGPSPTHTSELAAMEVQSK.[R]	1xOxidation [M17]; 1xTMT6plex [K22]; 1xTMT6plex [N-Term]; 1xPhospho [S7(100)]	7.67521e-07	7.97536e-05	1	1	2	13	Q4V896	Q4V896 [222-243]	Q4V896 1xPhospho [S228(100)]	0	2870.35	Q4V896	sorting nexin-15 [OS=Rattus norvegicus]	Snx15	0.779961	0.0565713	-0.330075	-0.302863	0.0273	0.6038	0.3193	0.3881	0.594653	0.582383	1	0.733558	0.732101	0.761379	1.072e-05	2.661e-08	5.62
[R].HASSSPESLKPTPAPGSR.[R]	1xTMT6plex [K10]; 1xTMT6plex [N-Term]; 2xPhospho [S3(100); S/T]	0.0275179	0.00257677	1	3	1	1	Q8BTI8	Q8BTI8 [431-448]	Q8BTI8 2xPhospho [S433(100); S/T]	0	2424.17	Q8BTI8	serine/arginine repetitive matrix protein 2 [OS=Mus musculus]	Srrm2	0.779841	-0.257493	-0.426665	-0.237228	0.0274	0.4027	0.1775	0.5518	0.714313	0.582431	1	0.841979	0.782859	0.654893	0.0009672	0.01131	2.68
[R].SSGRNSPSAASTSSNDSK.[A]	1xTMT6plex [K18]; 1xTMT6plex [N-Term]; 1xPhospho [S6(100)]	0.00185921	0.000170064	1	2	1	1	Q62901	Q62901 [607-624]	Q62901 1xPhospho [S612(100)]	1	2278.07	Q62901	Arginine-glutamic acid dipeptide repeats protein [OS=Rattus norvegicus]	Rere	0.778684	-0.100818	0.0306134	0.118093	0.0275	0.8365	0.3948	0.2715	0.657655	0.582898	1	0.605967	0.57066	0.532143	0.0001248	0.0006777	2.38
[K].SLAEAKSPEK.[A]	2xTMT6plex [K6; K10]; 1xTMT6plex [N-Term]; 1xPhospho [S7(100)]	0.00503474	0.000816232	1	1	1	4	P16884	P16884 [776-785]	P16884 1xPhospho [S782(100)]	1	1827.02	P16884	Neurofilament heavy polypeptide [OS=Rattus norvegicus]	Nefh	0.777908	-0.0563099	-0.136524	0.0487945	0.0276	0.9966	0.9415	0.4527	0.679293	0.583212	1	0.656702	0.641098	0.616557	0.0001745	0.00148	2.45
[K].ASPSESEK.[E]	1xTMT6plex [K8]; 1xTMT6plex [N-Term]; 1xPhospho [S2(100)]	0.0801584	0.00584381	1	1	1	1	P31257	P31257 [225-232]	P31257 1xPhospho [S226(100)]	0	1372.68	P31257	Homeobox protein Hox-C10 [OS=Mus musculus]	Hoxc10	0.777505	0.0986717	-0.165033	-0.430198	0.0277	0.4703	0.8223	0.1882	0.569054	0.583375	1	0.766754	0.654075	0.700375	0.001955	0.02259	1.94
[K].GIYVTRVSEGGPAEIAGLQIGDK.[I]	1xTMT6plex [K23]; 1xTMT6plex [N-Term]; 1xPhospho [T/S/Y]	0.0379287	0.00277048	1	1	1	1	Q9DBG9	Q9DBG9 [54-76]		1	2868.53	Q9DBG9	Tax1-binding protein 3 [OS=Mus musculus]	Tax1bp3	0.777505	-0.0246485	-0.169324	-0.166911	0.0278	0.8902	0.8052	0.7645	0.645824	0.583375	1	0.725036	0.656023	0.64491	0.001152	0.01135	2.98
[K].TRSPVEK.[E]	1xTMT6plex [K7]; 1xTMT6plex [N-Term]; 1xPhospho [S3(100)]	0.00722491	0.000930136	1	2	2	19	O55035	O55035 [712-718]	O55035 1xPhospho [S714(100)]	1	1354.75	O55035	peptidyl-prolyl cis-trans isomerase g [OS=Rattus norvegicus]	Ppig	-0.954487	-0.827431	0.103122	0.057226	0.0279	0.0256	0.2213	0.4269	0.911197	1	0.516025	0.87576	0.931016	0.524657	0.0002665	0.00223	3.06
[K].QNSDDEDRPQVSDEEK.[M]	1xTMT6plex [K16]; 1xTMT6plex [N-Term]; 2xPhospho [S3(100); S12(100)]	0.000994691	7.97536e-05	1	1	1	8	Q641X2	Q641X2 [239-254]	Q641X2 2xPhospho [S241(100); S250(100)]	0	2509.05	Q641X2	RNA polymerase-associated protein LEO1 [OS=Rattus norvegicus]	Leo1	-0.948911	-0.889176	0.197694	-0.205446	0.028	0.0199	0.0901	0.6436	0.867271	0.997001	0.51647	1	0.869329	0.46937	1.072e-05	0.0001851	4.49
[R].LRASDSPVHR.[R]	1xTMT6plex [N-Term]; 1xPhospho [S6(100)]	7.33289e-05	7.97536e-05	1	2	1	2	Q66H88	Q66H88 [56-65]	Q66H88 1xPhospho [S61(100)]	1	1446.74	Q66H88	Phospholipid phosphatase 6 [OS=Rattus norvegicus]	Ppapdc2; Plpp6	0.773531	0.112078	0.12887	0.163208	0.0281	0.4307	0.1765	0.1864	0.711473	0.584984	1	0.635372	0.534996	0.578215	1.072e-05	7.127e-06	4.32
[K].SPVVSGDTSPR.[H]	1xTMT6plex [N-Term]; 1xPhospho [S9(98.9)]	0.0386181	0.00338219	6	14	3	9	P19332-4; P10637-3; P19332-1; P19332-6; P19332-3; P10637-1	P19332-4 [453-463]; P10637-3 [296-306]; P19332-1 [707-717]; P19332-6 [329-339]; P19332-3 [358-368]; P10637-1 [688-698]	P19332-4 1xPhospho [S461(98.9)]; P10637-3 1xPhospho [S304(98.9)]; P19332-1 1xPhospho [S715(98.9)]; P19332-6 1xPhospho [S337(98.9)]; P19332-3 1xPhospho [S366(98.9)]; P10637-1 1xPhospho [S696(98.9)]	0	1410.68	P19332-4	Isoform Tau-D of Microtubule-associated protein tau [OS=Rattus norvegicus]	Mapt	0.77332	0.109092	-0.18817	-0.348875	0.0282	0.4395	0.7336	0.2983	0.506496	0.585069	1	0.645057	0.66658	0.718939	0.001346	0.01658	1.79
[R].WWQQEEQLEPEESREEVSFPDR.[Q]	1xTMT6plex [N-Term]; 1xPhospho [S13(100)]	4.13976e-05	5.91125e-05	1	1	3	20	O35314	O35314 [478-499]	O35314 1xPhospho [S490(100)]	1	3142.4	O35314	Secretogranin-1 [OS=Rattus norvegicus]	Chgb	-0.943259	-0.278258	0.312082	-0.137942	0.0283	0.3607	0.0296	0.8686	0.859094	1	0.520057	0.945291	0.805479	0.664186	4.518e-05	3.983e-05	6.16
[R].HQQGKVTVK.[Y]	2xTMT6plex [K5; K9]; 1xTMT6plex [N-Term]; 1xPhospho [T7(100)]	0.000754305	7.97536e-05	1	2	1	1	Q8R4R9	Q8R4R9 [66-74]	Q8R4R9 1xPhospho [T72(100)]	1	1792.04	Q8R4R9	Protein phosphatase 1 regulatory subunit 14C [OS=Rattus norvegicus]	Ppp1r14c	0.772452	-0.0596612	-0.65873	-0.634584	0.0284	0.9834	0.0463	0.0604	0.644126	0.561479	0.959102	1	0.886402	0.850494	1.072e-05	0.0001299	3.28
[K].AVPATPPRTGSPLTVATGNDQAATEAK.[I]	1xTMT6plex [K27]; 1xTMT6plex [N-Term]; 1xPhospho [T5(100)]	0.00510575	0.000816232	1	1	1	1	P0DJJ3	P0DJJ3 [255-281]	P0DJJ3 1xPhospho [T259(100)]	1	3159.65	P0DJJ3	SH3-containing GRB2-like protein 3-interacting protein 1 [OS=Rattus norvegicus]	Sgip1	0.770811	-0.0947586	-0.417464	-0.820761	0.0285	0.8583	0.1874	0.0266	0.523086	0.586088	1	0.923946	0.782766	0.733005	0.0001745	0.001507	2.15
[R].ILVNSASAQK.[R]	1xTMT6plex [K10]; 1xTMT6plex [N-Term]; 1xPhospho [S7(100)]	0.00418977	0.000769263	1	1	2	2	Q99JD4	Q99JD4 [489-498]	Q99JD4 1xPhospho [S495(100)]	0	1568.88	Q99JD4	CLIP-associating protein 2 [OS=Rattus norvegicus]	Clasp2	0.770706	-0.213178	-0.204903	-0.00830534	0.0286	0.5031	0.6726	0.641	0.589224	0.586131	1	0.592626	0.675579	0.582778	0.000151	0.001191	2.13
[R].QSLALPLSTK.[E]	1xTMT6plex [K10]; 1xTMT6plex [N-Term]; 1xPhospho [S2(100)]	0.000275447	7.97536e-05	1	3	1	4	Q7TPK1	Q7TPK1 [75-84]	Q7TPK1 1xPhospho [S76(100)]	0	1595.92	Q7TPK1	E3 ubiquitin-protein ligase UHRF1 [OS=Rattus norvegicus]	Uhrf1	0.77067	0.189105	0.157605	0.26649	0.0287	0.2452	0.135	0.0712	0.569507	0.586145	1	0.473454	0.525486	0.599084	1.072e-05	3.641e-05	3.23
[K].EPVRADSPVPTEQLPR.[T]	1xTMT6plex [N-Term]; 1xPhospho [S7(100)]	2.81645e-07	7.97536e-05	1	1	1	11	Q7TN02	Q7TN02 [429-444]	Q7TN02 1xPhospho [S435(100)]	1	2100.07	Q7TN02	Mediator of RNA polymerase II transcription subunit 26 [OS=Mus musculus]	Med26	0.770534	-0.368548	-0.304594	-0.0511929	0.0288	0.2247	0.372	0.7945	0.639099	0.586201	1	0.662184	0.724	0.560782	1.072e-05	7.801e-09	4.8
[K].SEQPEEVLSSEEETAGVEHVK.[S]	1xTMT6plex [K21]; 1xTMT6plex [N-Term]; 2xPhospho [S9(100); S10(100)]	8.70532e-06	3.88506e-05	1	1	2	5	Q63475	Q63475 [416-436]	Q63475 2xPhospho [S424(100); S425(100)]	0	2931.33	Q63475	Receptor-type tyrosine-protein phosphatase N2 [OS=Rattus norvegicus]	Ptprn2	0.769544	-0.509062	-0.339783	-0.0954821	0.0289	0.1076	0.2996	0.9674	0.730038	0.586603	1	0.779989	0.742385	0.521658	1.413e-05	9.366e-06	6.19
[K].EAINNVDTSSSDFTILQEMEEASLEPENEK.[I]	1xTMT6plex [K30]; 1xTMT6plex [N-Term]; 1xPhospho [S/T]	7.04592e-05	5.91125e-05	1	1	2	3	O88453	O88453 [186-215]		0	3907.81	O88453	Scaffold attachment factor B1 [OS=Rattus norvegicus]	Safb	-0.930212	-0.0815913	0.0132056	0.00710344	0.029	0.9055	0.4519	0.5874	0.967674	1	0.524781	0.962921	0.990888	0.936404	5.611e-05	6.286e-05	6.17
[R].DLTHSDSESSLHTSDR.[Q]	1xTMT6plex [N-Term]; 1xPhospho [S5(100)]	6.59165e-08	7.97536e-05	1	1	3	21	P84903	P84903 [515-530]	P84903 1xPhospho [S519(100)]	0	2095.91	P84903	stromal interaction molecule 1 [OS=Rattus norvegicus]	Stim1	0.768619	-0.0167074	-0.032428	-0.0896537	0.0291	0.8586	0.6238	0.9423	0.643674	0.586979	1	0.684943	0.600322	0.59341	1.072e-05	1.311e-09	5.11
[R].DLISLDSIDNHSSTGGQSDQGYGSK.[D]	1xTMT6plex [K25]; 1xTMT6plex [N-Term]; 1xPhospho [S/T/Y]	2.63766e-07	7.97536e-05	1	1	4	16	A6H8H2-2	A6H8H2-2 [946-970]		0	3119.46	A6H8H2-2	Isoform 2 of DENN domain-containing protein 4C [OS=Mus musculus]	Dennd4c	0.768277	-0.0938374	-0.309195	-0.350311	0.0292	0.8613	0.3619	0.2963	0.659815	0.587118	1	0.841156	0.727449	0.681639	1.072e-05	7.186e-09	3.57
[K].TLDVKSPEAK.[T]	2xTMT6plex [K5; K10]; 1xTMT6plex [N-Term]; 1xPhospho [S6(100)]	0.0636061	0.00471789	1	1	1	1	P16884	P16884 [822-831]	P16884 1xPhospho [S827(100)]	1	1855.05	P16884	Neurofilament heavy polypeptide [OS=Rattus norvegicus]	Nefh	0.765433	-0.438679	-0.478021	-0.324648	0.0293	0.1532	0.1283	0.3437	0.617931	0.588277	1	0.773871	0.819371	0.60454	0.001675	0.01829	1.77
[R].TAAPSPDRR.[D]	1xTMT6plex [N-Term]; 1xPhospho [S5(100)]	0.0845219	0.0060305	1	2	1	3	Q9JKA9	Q9JKA9 [830-838]	Q9JKA9 1xPhospho [S834(100)]	1	1279.64	Q9JKA9	Potassium/sodium hyperpolarization-activated cyclic nucleotide-gated channel 2 [OS=Rattus norvegicus]	Hcn2	0.764312	0.120761	-0.111856	-0.0136306	0.0293	0.406	0.9557	0.6623	0.567055	0.588734	1	0.572438	0.636197	0.691742	0.001999	0.02383	1.89
[R].RKISDDEWADNPR.[S]	1xTMT6plex [K2]; 1xTMT6plex [N-Term]; 1xPhospho [S4(100)]	4.03253e-05	7.97536e-05	1	1	1	3	Q66H16	Q66H16 [68-80]	Q66H16 1xPhospho [S71(100)]	2	2140.06	Q66H16	Fibrous sheath-interacting protein 1 [OS=Rattus norvegicus]	Fsip1	0.764188	0.0712829	-0.390199	-0.0412683	0.0294	0.5526	0.2212	0.7565	0.728867	0.588785	1	0.750017	0.771646	0.81073	1.072e-05	3.419e-06	3.64
[K].GYSSLDQSPDEKPLVALDTDSDDDFDMSR.[Y]	1xOxidation [M27]; 1xTMT6plex [K12]; 1xTMT6plex [N-Term]; 2xPhospho [T19(99.9); S21(99.9)]	0.000248886	7.97536e-05	1	1	1	2	Q9D772	Q9D772 [67-95]	Q9D772 2xPhospho [T85(99.9); S87(99.9)]	0	3852.65	Q9D772	Protein FAM219A [OS=Mus musculus]	2310028H24Rik; Fam219a	0.76409	-0.207001	-0.00919017	0.225612	0.0295	0.5172	0.5361	0.1051	0.613958	0.588825	1	0.525077	0.592587	0.51338	1.072e-05	3.217e-05	3.16
[K].SHEETDSTK.[E]	1xTMT6plex [K9]; 1xTMT6plex [N-Term]; 1xPhospho [S1(100)]	0.0300641	0.00279762	1	1	1	9	P47868	P47868 [365-373]	P47868 1xPhospho [S365(100)]	0	1571.74	P47868	Secretogranin-3 [OS=Rattus norvegicus]	Scg3	-0.909115	-0.18498	-0.253717	-0.289665	0.0296	0.5785	0.5101	0.4173	0.818092	0.776548	0.413521	1	0.925858	0.814442	0.001063	0.01254	4.05
[K].VNGDASPAAAEPGAK.[E]	1xTMT6plex [K15]; 1xTMT6plex [N-Term]; 1xPhospho [S6(100)]	7.12095e-07	7.97536e-05	1	2	1	8	P30009	P30009 [41-55]	P30009 1xPhospho [S46(100)]	0	1892.95	P30009	Myristoylated alanine-rich C-kinase substrate [OS=Rattus norvegicus]	Marcks	0.762467	-0.0700942	-0.366523	-0.373753	0.0297	0.9471	0.2552	0.2588	0.597838	0.589487	1	0.77463	0.759992	0.72395	1.072e-05	2.421e-08	4.79
[K].ENSAAPSPIRPHSTSPAK.[E]	1xTMT6plex [K18]; 1xTMT6plex [N-Term]; 3xPhospho [S3(100); S7(100); S/T]	0.00145528	0.000243324	1	1	2	5	Q920Q0	Q920Q0 [110-127]	Q920Q0 3xPhospho [S112(100); S116(100); S/T]	0	2545.17	Q920Q0	Paralemmin-1 [OS=Rattus norvegicus]	Palm	0.761888	0.665236	-0.0579758	-0.341846	0.0298	0.003	0.7259	0.3108	0.593655	0.589724	1	0.752385	0.613905	0.973548	3.16e-05	0.0003071	3.42
[R].QESDEDSDSDQPSRK.[R]	1xTMT6plex [K15]; 1xTMT6plex [N-Term]; 1xPhospho [S7(99.1)]	0.00456872	0.000769263	1	2	1	3	Q62018-1	Q62018-1 [1077-1091]	Q62018-1 1xPhospho [S1083(99.1)]	1	2261	Q62018-1	RNA polymerase-associated protein CTR9 homolog [OS=Mus musculus]	Ctr9	0.761358	0.568009	-0.00682025	-0.0116036	0.0299	0.0094	0.5279	0.6537	0.638529	0.589941	1	0.643685	0.592736	0.878718	0.000159	0.001324	1.72
[K].EQMGEAMSDGWEVEEDK.[E]	1xOxidation [M]; 1xTMT6plex [K17]; 1xTMT6plex [N-Term]; 1xPhospho [S8(100)]	0.0113997	0.00125084	1	2	2	2	Q9WUJ3	Q9WUJ3 [1063-1079]	Q9WUJ3 1xPhospho [S1070(100)]	0	2524.07	Q9WUJ3	Myomegalin [OS=Rattus norvegicus]	Pde4dip	-0.900566	0.00805781	-0.0694928	0.121069	0.03	0.7678	0.7756	0.2641	0.910459	0.947665	0.507642	0.837173	0.99443	1	0.0004185	0.003613	1.98
[R].GKDSQSPRSAPSSQGR.[G]	1xTMT6plex [K2]; 1xTMT6plex [N-Term]; 4xPhospho [S4(100); S6(100); S9(100); S12(97.8)]	0.0157047	0.00134777	1	1	2	2	Q80WV7	Q80WV7 [357-372]	Q80WV7 4xPhospho [S360(100); S362(100); S365(100); S368(97.8)]	2	2423	Q80WV7	Serine/arginine repetitive matrix protein 3 [OS=Mus musculus]	Srrm3	-0.900566	-1.01208	0.0852486	-0.135567	0.0301	0.0143	0.2568	0.8773	0.872766	1	0.535676	0.958755	0.942622	0.467383	0.0005268	0.004966	2.8
[R].MGPARPPSHLSGSQSSLGSETGAGATDPQGGTLPRPEPR.[V]	1xTMT6plex [N-Term]; 4xPhospho [S11(100); S13(97.7); S16(97.7); S19(95.3)]	0.00350395	0.000710363	1	1	2	2	O54880	O54880 [251-289]	O54880 4xPhospho [S261(100); S263(97.7); S266(97.7); S269(95.3)]	0	4389.9	O54880	Rab effector Noc2 [OS=Rattus norvegicus]	Rph3al	0.759741	-0.525313	-0.459985	-0.299657	0.0302	0.0994	0.1447	0.3958	0.633516	0.590602	1	0.779764	0.81239	0.564455	0.0001283	0.0009567	2.8
[R].TVSSPIPYTPSPSSSRPISPGLSYASHTVGFTPPTSLTR.[A]	4xPhospho [S3; S4; S11; S13]; 1xTMT6plex [N-Term]	3.50467e-05	7.97536e-05	1	1	1	1	D3YZP9	D3YZP9 [342-380]	D3YZP9 4xPhospho [S344; S345; S352; S354]	0	4579.08	D3YZP9	coiled-coil domain-containing protein 6 [OS=Mus musculus]	Ccdc6	0.759093	-0.243057	-0.602694	-0.513966	0.0303	0.4339	0.0618	0.1169	0.63097	0.590868	1	0.901006	0.897261	0.758144	1.072e-05	2.881e-06	4.4
[K].DSAPELNVSSSETEEDKEEAKPDGEK.[D]	3xTMT6plex [K17; K21; K26]; 1xTMT6plex [N-Term]; 4xPhospho [S9(100); S10(100); S11(100); T13(100)]	0.000677884	7.97536e-05	1	4	1	1	Q76LT8	Q76LT8 [879-904]	Q76LT8 4xPhospho [S887(100); S888(100); S889(100); T891(100)]	1	4056.77	Q76LT8	Ubiquitin carboxyl-terminal hydrolase 48 [OS=Rattus norvegicus]	Usp48	0.759028	-0.12551	-0.118352	-0.105616	0.0304	0.7526	0.9835	0.9926	0.636687	0.590894	1	0.685046	0.641412	0.587969	1.072e-05	0.0001129	2.92
[R].SRLTPTSAESSSTGTEDK.[S]	1xTMT6plex [K18]; 1xTMT6plex [N-Term]; 1xPhospho [T4(100)]	7.23911e-08	7.97536e-05	1	2	1	8	O08623-1	O08623-1 [263-280]	O08623-1 1xPhospho [T266(100)]	1	2392.16	O08623-1	sequestosome-1 [OS=Rattus norvegicus]	Sqstm1	0.758517	-0.00967275	-0.617706	-0.13709	0.0305	0.8316	0.0583	0.8721	0.716106	0.591103	1	0.787491	0.907009	0.900948	1.072e-05	1.474e-09	5.37
[R].RSTPTPELTSK.[K]	1xTMT6plex [K11]; 1xTMT6plex [N-Term]; 2xPhospho [T5(100); S/T]	0.00084241	7.97536e-05	2	7	2	6	P0DJJ3; Q8VD37-3	P0DJJ3 [178-188]; Q8VD37-3 [177-187]	P0DJJ3 2xPhospho [T182(100); S/T]; Q8VD37-3 2xPhospho [T181(100); S/T]	1	1834.91	P0DJJ3	SH3-containing GRB2-like protein 3-interacting protein 1 [OS=Rattus norvegicus]	Sgip1	0.757297	0.0629234	-0.577931	-0.310467	0.0306	0.5819	0.07	0.3713	0.702949	0.591604	1	0.871733	0.883091	0.92246	1.072e-05	0.0001498	3.26
[K].RPDDRYDTPTSK.[K]	1xTMT6plex [K12]; 1xTMT6plex [N-Term]; 1xPhospho [T8(98.3)]	0.0631888	0.00471789	1	2	1	1	E9Q5F9	E9Q5F9 [2067-2078]	E9Q5F9 1xPhospho [T2074(98.3)]	1	1988.98	E9Q5F9	Histone-lysine N-methyltransferase SETD2 [OS=Mus musculus]	Setd2	0.757192	0.119551	-0.0741335	0.103869	0.0307	0.4095	0.7937	0.3031	0.610607	0.591647	1	0.568191	0.622843	0.676655	0.001675	0.01811	1.5
[K].QQPLESPAHQK.[V]	1xTMT6plex [K11]; 1xTMT6plex [N-Term]; 1xPhospho [S6(100)]	0.00398698	0.000710363	1	1	1	1	A2AHC3-1	A2AHC3-1 [211-221]	A2AHC3-1 1xPhospho [S216(100)]	0	1800.94	A2AHC3-1	Calmodulin-regulated spectrin-associated protein 1 [OS=Mus musculus]	Camsap1	0.756546	-0.0116591	0.268081	0.391778	0.0308	0.8406	0.046	0.0218	0.611902	0.591912	1	0.466386	0.491537	0.487581	0.000135	0.001119	2.24
[R].LDLDLTSDSQPPVFK.[V]	1xTMT6plex [K15]; 1xTMT6plex [N-Term]; 1xPhospho [S9(98.7)]	4.59443e-06	7.97536e-05	1	2	3	11	O08629	O08629 [494-508]	O08629 1xPhospho [S502(98.7)]	0	2213.15	O08629	Transcription intermediary factor 1-beta [OS=Rattus norvegicus]	Trim28	-0.887742	-0.856065	-0.0853993	-0.0730508	0.0309	0.0228	0.8405	0.878	0.950626	0.78213	0.42271	1	0.829826	0.458443	1.072e-05	2.389e-07	3.89
[K].GTNVFGSLER.[G]	1xTMT6plex [N-Term]; 1xPhospho [S7(100)]	0.000300609	7.97536e-05	1	1	1	6	Q61846	Q61846 [515-524]	Q61846 1xPhospho [S521(100)]	0	1388.68	Q61846	Maternal embryonic leucine zipper kinase [OS=Mus musculus]	Melk	0.755503	0.33223	0.0594991	0.132924	0.031	0.0701	0.317	0.2411	0.674293	0.59234	1	0.614942	0.568408	0.715601	1.072e-05	4.068e-05	3.71
[R].SDSSGSTRRSWELR.[T]	1xTMT6plex [N-Term]; 1xPhospho [S/T]	0.00474007	0.000816232	1	2	1	1	O08648-1	O08648-1 [1254-1267]		2	1932.91	O08648-1	Mitogen-activated protein kinase kinase kinase 4 [OS=Mus musculus]	Map3k4	0.754864	-0.136927	-0.314417	-0.177351	0.0311	0.7175	0.3514	0.7335	0.70483	0.592602	1	0.797026	0.736907	0.670183	0.0001672	0.001384	2.67
[R].TVSPSTIRDGPSSAPATPTK.[A]	1xTMT6plex [K20]; 1xTMT6plex [N-Term]; 1xPhospho [S/T]	0.00157013	0.000403121	1	3	1	2	Q8CDG3	Q8CDG3 [744-763]		1	2508.31	Q8CDG3	Deubiquitinating protein VCIP135 [OS=Mus musculus]	Vcpip1	0.754413	-0.118157	-0.345428	-0.238022	0.0312	0.778	0.289	0.5491	0.734445	0.592787	1	0.866186	0.753153	0.693928	6.241e-05	0.0003395	2.48
[K].KLSSWDQAETPGHTPSLR.[W]	1xTMT6plex [K1]; 1xTMT6plex [N-Term]; 2xPhospho [T10(100); T14(97.7)]	0.0019464	0.00046153	1	1	1	1	Q99NB9	Q99NB9 [214-231]	Q99NB9 2xPhospho [T223(100); T227(97.7)]	1	2628.26	Q99NB9	splicing factor 3B subunit 1 [OS=Mus musculus]	Sf3b1	0.753423	-0.011368	-0.736056	-0.724218	0.0313	0.8391	0.0307	0.0404	0.605325	0.56773	0.957072	1	0.94562	0.938199	6.971e-05	0.0004498	4.16
[K].TPNITPNTK.[A]	1xTMT6plex [K9]; 1xTMT6plex [N-Term]; 1xPhospho [T5(98.6)]	0.0565186	0.00437982	1	1	1	1	Q8K298	Q8K298 [392-400]	Q8K298 1xPhospho [T396(98.6)]	0	1523.82	Q8K298	Anillin [OS=Mus musculus]	Anln	0.752955	0.354787	0.122756	0.099043	0.0314	0.0573	0.1864	0.3138	0.606027	0.593387	1	0.565818	0.544985	0.696925	0.001549	0.01637	2.49
[K].TKPMASVTNAHTASTQAAPAAVTTPTLSSNQGTPTSPVK.[K]	2xTMT6plex [K2; K39]; 1xTMT6plex [N-Term]; 1xPhospho [S36(100)]	7.17286e-12	7.97536e-05	1	3	2	3	Q10728-1	Q10728-1 [374-412]	Q10728-1 1xPhospho [S409(100)]	0	4589.39	Q10728-1	Protein phosphatase 1 regulatory subunit 12A [OS=Rattus norvegicus]	Ppp1r12a	0.75151	0.093508	0.149576	0.20024	0.0315	0.4855	0.1467	0.1344	0.675043	0.593981	1	0.587561	0.535483	0.57134	1.072e-05	1.827e-14	6.98
[R].CDSASSTPKTPDGGHSSQEIK.[S]	1xCarbamidomethyl [C1]; 2xTMT6plex [K9; K21]; 1xTMT6plex [N-Term]; 1xPhospho [S/T]	0.0243332	0.00193691	1	2	1	1	Q5SVL6-1	Q5SVL6-1 [565-585]		1	2956.43	Q5SVL6-1	Rap1 GTPase-activating protein 2 [OS=Mus musculus]	Rap1gap2	0.750669	-0.217461	-0.229419	-0.580146	0.0316	0.4934	0.5895	0.0804	0.543779	0.594328	1	0.81295	0.696768	0.599274	0.0008054	0.007535	1.88
[R].RSPSYPPPGCGK.[S]	1xCarbamidomethyl [C10]; 1xTMT6plex [K12]; 1xTMT6plex [N-Term]; 1xPhospho [S2(99.5)]	7.98462e-06	7.97536e-05	1	1	3	6	Q3UD82	Q3UD82 [288-299]	Q3UD82 1xPhospho [S289(99.5)]	1	1840.92	Q3UD82	Poly [ADP-ribose] polymerase 8 [OS=Mus musculus]	Parp8	-0.873487	-0.512091	-0.32232	-0.415957	0.0316	0.1066	0.3348	0.2036	0.749522	0.769798	0.420176	1	0.96251	0.674917	1.072e-05	4.698e-07	3.67
[K].SALSPSKSPAK.[L]	2xTMT6plex [K7; K11]; 1xTMT6plex [N-Term]; 2xPhospho [S4(100); S8(100)]	0.00448575	0.000769263	1	1	2	3	Q9ERU9	Q9ERU9 [2110-2120]	Q9ERU9 2xPhospho [S2113(100); S2117(100)]	1	1920.02	Q9ERU9	E3 SUMO-protein ligase RanBP2 [OS=Mus musculus]	Ranbp2	0.750268	0.0873167	0.218479	0.378515	0.0317	0.503	0.0731	0.0251	0.660184	0.594493	1	0.507833	0.51095	0.542829	0.000159	0.001296	2.17
[R].RHSSETFSSTTTVTPVSPSFAHNSK.[R]	1xTMT6plex [K25]; 1xTMT6plex [N-Term]; 1xPhospho [S/T]	0.000115759	5.91125e-05	1	1	1	1	P81122	P81122 [1135-1159]		1	3230.59	P81122	Insulin receptor substrate 2 [OS=Mus musculus]	Irs2	0.749626	0.283753	-0.272348	-0.129616	0.0318	0.1126	0.4522	0.8964	0.72004	0.594758	1	0.787726	0.718331	0.874466	5.611e-05	8.955e-05	5.02
[K].SLEAASEK.[Y]	1xTMT6plex [K8]; 1xTMT6plex [N-Term]; 1xPhospho [S1(100)]	0.0060568	0.000874552	1	2	1	1	P09495	P09495 [170-177]	P09495 1xPhospho [S170(100)]	0	1372.71	P09495	Tropomyosin alpha-4 chain [OS=Rattus norvegicus]	Tpm4	0.749376	0.0932284	-0.816613	-0.84062	0.0319	0.4866	0.0221	0.0245	0.558404	0.486168	0.817281	1	0.856272	0.913432	0.0002305	0.001832	2.82
[K].ADLQGSASPSK.[V]	1xTMT6plex [K11]; 1xTMT6plex [N-Term]; 1xPhospho [S8(100)]	0.0140401	0.00138619	1	3	1	2	O88588-1	O88588-1 [486-496]	O88588-1 1xPhospho [S493(100)]	0	1598.82	O88588-1	Phosphofurin acidic cluster sorting protein 1 [OS=Rattus norvegicus]	Pacs1	0.749265	0.196811	0.163039	0.0526764	0.032	0.2325	0.1276	0.4415	0.633537	0.594907	1	0.610822	0.531336	0.608997	0.00051	0.004958	2.64
[K].MQNSDDERPQVSDEDRRHSDDEEEQDQK.[S]	1xOxidation [M1]; 1xTMT6plex [K28]; 1xTMT6plex [N-Term]; 3xPhospho [S4(100); S12(100); S19(100)]	0.0565186	0.00437982	1	1	1	1	Q641X2	Q641X2 [255-282]	Q641X2 3xPhospho [S258(100); S266(100); S273(100)]	2	4131.63	Q641X2	RNA polymerase-associated protein LEO1 [OS=Rattus norvegicus]	Leo1	-0.866459	-1.19416	-0.387406	-0.893782	0.0321	0.0087	0.2256	0.0192	0.538201	0.616062	0.337905	1	0.805833	0.352181	0.001549	0.01642	1.99
[R].APLATIADQQQLHLSPLK.[R]	1xTMT6plex [K18]; 1xTMT6plex [N-Term]; 1xPhospho [S15(100)]	4.53687e-05	5.91125e-05	1	1	1	7	Q4KLN6	Q4KLN6 [6-23]	Q4KLN6 1xPhospho [S20(100)]	0	2482.38	Q4KLN6	ribonucleoside-diphosphate reductase subunit M2 [OS=Rattus norvegicus]	Rrm2	0.748451	0.13191	0.138981	0.202906	0.0322	0.3748	0.1627	0.1307	0.649569	0.595242	1	0.564345	0.540575	0.592332	4.518e-05	4.339e-05	5.02
[K].EGEEPTVYSDDEEPKDEAAR.[K]	1xTMT6plex [K15]; 1xTMT6plex [N-Term]; 1xPhospho [S9(100)]	5.95162e-05	5.91125e-05	1	1	2	7	P70580	P70580 [173-192]	P70580 1xPhospho [S181(100)]	1	2804.26	P70580	Membrane-associated progesterone receptor component 1 [OS=Rattus norvegicus]	Pgrmc1	0.747821	-0.0913667	0.153558	0.328038	0.0323	0.8701	0.1405	0.0407	0.690687	0.595502	1	0.550215	0.535375	0.50252	5.611e-05	5.496e-05	5.51
[R].MLPHAPGVQMQAIPEDAIPEESGDEDEEDPDKR.[I]	1xTMT6plex [K32]; 1xTMT6plex [N-Term]; 1xPhospho [S22(100)]	1.33111e-09	7.97536e-05	1	2	1	4	Q4QQW4	Q4QQW4 [372-404]	Q4QQW4 1xPhospho [S393(100)]	1	4183.92	Q4QQW4	histone deacetylase 1 [OS=Rattus norvegicus]	Hdac1	0.746659	0.0376687	0.0925095	0.144353	0.0324	0.6653	0.2419	0.2195	0.669648	0.595982	1	0.605887	0.558965	0.573752	1.072e-05	1.101e-11	6.29
[R].KVSADGAAK.[A]	2xTMT6plex [K1; K9]; 1xTMT6plex [N-Term]; 1xPhospho [S3(100)]	0.0030859	0.000587017	1	1	1	5	P18608	P18608 [5-13]	P18608 1xPhospho [S7(100)]	1	1613.92	P18608	Non-histone chromosomal protein HMG-14 [OS=Mus musculus]	Hmgn1; LOC100044391; LOC102641809	0.74618	-0.243556	-0.390544	-0.33436	0.0325	0.4328	0.2208	0.3244	0.610711	0.59618	1	0.769996	0.781525	0.660124	0.0001122	0.0008175	3.19
[R].GSGESASWSAESPGK.[T]	1xTMT6plex [K15]; 1xTMT6plex [N-Term]; 1xPhospho [S12(100)]	2.30259e-07	7.97536e-05	1	1	1	8	Q9EQH1	Q9EQH1 [412-426]	Q9EQH1 1xPhospho [S423(100)]	0	1974.92	Q9EQH1	GRB2-associated-binding protein 2 [OS=Rattus norvegicus]	Gab2	0.745833	0.0472918	-0.219606	0.0752166	0.0326	0.6338	0.6208	0.3763	0.646161	0.596323	1	0.613335	0.694368	0.717507	1.072e-05	6.086e-09	4.3
[R].FSDLDSASVDSDMYDLPK.[K]	1xTMT6plex [K18]; 1xTMT6plex [N-Term]; 1xPhospho [S8(100)]	0.00263062	0.000587017	1	1	1	2	Q63190	Q63190 [62-79]	Q63190 1xPhospho [S69(100)]	0	2543.17	Q63190	Emerin [OS=Rattus norvegicus]	Emd	0.745686	-0.261409	-0.161924	-0.0746552	0.0327	0.395	0.8346	0.8841	0.620118	0.596384	1	0.653052	0.667222	0.556645	9.544e-05	0.0006678	2.38
[R].RVQRPEDASGGSSPSGTSK.[S]	1xTMT6plex [K19]; 1xTMT6plex [N-Term]; 1xPhospho [S9(97.8)]	0.00415203	0.000769263	1	3	1	1	O08719	O08719 [232-250]	O08719 1xPhospho [S240(97.8)]	1	2441.22	O08719	Ena/VASP-like protein [OS=Rattus norvegicus]	Evl	0.745472	0.211698	0.372705	0.424914	0.0328	0.2081	0.0155	0.0158	0.64696	0.596473	1	0.481909	0.460676	0.533486	0.000151	0.001178	2.25
[R].SRSLSGTGR.[S]	1xTMT6plex [N-Term]; 1xPhospho [S/T]	0.134958	0.00981101	1	2	2	2	Q4G008	Q4G008 [349-357]	Q4G008 1xPhospho [S351(97.1)]	1	1229.62	Q4G008	uncharacterized protein KIAA0930 homolog [OS=Rattus norvegicus]	RGD1304694	0.743042	-0.526559	-0.384591	-0.458965	0.0329	0.0983	0.2291	0.1591	0.643282	0.597478	1	0.884227	0.780002	0.541484	0.003011	0.03716	1.35
[R].SGAASMPSSPK.[Q]	1xOxidation [M6]; 1xTMT6plex [K11]; 1xTMT6plex [N-Term]; 2xPhospho [S8(100); S9(100)]	0.0055838	0.000816232	1	2	4	6	Q8K1N2	Q8K1N2 [195-205]	Q8K1N2 2xPhospho [S202(100); S203(100)]	0	1653.74	Q8K1N2	Pleckstrin homology-like domain family B member 2 [OS=Mus musculus]	Phldb2	-0.847618	-0.481452	0.397981	0.305028	0.033	0.1227	0.0122	0.0509	0.852482	1	0.555702	0.690022	0.75892	0.543581	0.000198	0.001674	2.3
[K].TASPDDSDMPDHDLEPPR.[F]	1xTMT6plex [N-Term]; 1xPhospho [S3(100)]	1.5967e-05	7.97536e-05	1	1	1	3	Q62671	Q62671 [1295-1312]	Q62671 1xPhospho [S1297(100)]	0	2303.97	Q62671	E3 ubiquitin-protein ligase UBR5 [OS=Rattus norvegicus]	Ubr5	0.742553	0.17373	-0.182624	-0.260156	0.0331	0.2779	0.7564	0.4905	0.622309	0.597681	1	0.745282	0.678336	0.765143	1.072e-05	1.096e-06	3.71
[R].TVEIPEDEVVRTPR.[S]	1xTMT6plex [N-Term]; 1xPhospho [T12(100)]	0.0638866	0.00513101	1	4	1	1	Q9Z1W6-1	Q9Z1W6-1 [131-144]	Q9Z1W6-1 1xPhospho [T142(100)]	1	1948.99	Q9Z1W6-1	protein LYRIC [OS=Rattus norvegicus]	Mtdh	0.741349	-0.294994	-0.27641	-0.178095	0.0332	0.3314	0.4411	0.731	0.700439	0.59818	1	0.792469	0.724502	0.590524	0.002125	0.02879	3.43
[K].SGNSESK.[R]	1xTMT6plex [K7]; 1xTMT6plex [N-Term]; 1xPhospho [S]	0.0122314	0.00125084	1	2	3	4	Q5M7W5-1	Q5M7W5-1 [57-63]		0	1246.61	Q5M7W5-1	Microtubule-associated protein 4 [OS=Rattus norvegicus]	Map4	0.740747	0.257266	-0.179218	-0.0400279	0.0333	0.1417	0.7685	0.7532	0.601154	0.598429	1	0.618067	0.677584	0.809856	0.0004391	0.003871	2.34
[K].NAPPAGDEPLAETESESEAELAGFSPVVDVKK.[T]	2xTMT6plex [K31; K32]; 1xTMT6plex [N-Term]; 3xPhospho [T13(100); S15(100); S17(100)]	2.66842e-06	7.97536e-05	1	1	1	1	Q3MHU5	Q3MHU5 [262-293]	Q3MHU5 3xPhospho [T274(100); S276(100); S278(100)]	1	4210.97	Q3MHU5	Reticulophagy regulator 2 [OS=Rattus norvegicus]	Fam134a; Retreg2	0.740727	-0.382663	0.0360799	0.00149589	0.0334	0.2085	0.3819	0.6071	0.583046	0.598438	1	0.582441	0.583657	0.447677	1.072e-05	1.222e-07	4.11
[K].SLENETLNK.[E]	1xTMT6plex [K9]; 1xTMT6plex [N-Term]; 1xPhospho [S1(100)]	0.0552142	0.00438098	1	1	1	3	Q8BGD9	Q8BGD9 [445-453]	Q8BGD9 1xPhospho [S445(100)]	0	1585.82	Q8BGD9	eukaryotic translation initiation factor 4B [OS=Mus musculus]	Eif4b	-0.84086	0.189197	-0.163815	-0.53976	0.0335	0.2451	0.8275	0.1008	0.687885	0.760032	0.424334	1	0.851423	0.970732	0.001841	0.02454	3.69
[K].DILKPSPGK.[S]	2xTMT6plex [K4; K9]; 1xTMT6plex [N-Term]; 1xPhospho [S6(100)]	0.0238988	0.00193691	1	2	1	6	P31643	P31643 [16-24]	P31643 1xPhospho [S21(100)]	0	1722.02	P31643	Sodium- and chloride-dependent taurine transporter [OS=Rattus norvegicus]	Slc6a6	0.739781	0.710969	-0.278407	-0.315415	0.0336	0.0022	0.4345	0.3612	0.508422	0.503696	0.841132	0.632664	0.61091	1	0.0007914	0.007445	1.74
[K].HALGGSLEHLPR.[A]	1xTMT6plex [N-Term]; 1xPhospho [S6(100)]	2.98593e-06	7.97536e-05	1	3	1	2	Q5SP85	Q5SP85 [337-348]	Q5SP85 1xPhospho [S342(100)]	0	1595.83	Q5SP85	Coiled-coil domain-containing protein 85A [OS=Mus musculus]	Ccdc85a	0.739258	0.32928	-0.356036	-0.239415	0.0337	0.0725	0.2718	0.5446	0.713029	0.599047	1	0.841741	0.766724	0.963301	1.072e-05	1.402e-07	5.06
[R].VSSPLPSPSAMSDAANSQAAAK.[L]	1xTMT6plex [K22]; 1xTMT6plex [N-Term]; 1xPhospho [S]	0.00984351	0.000953665	1	2	1	1	Q8VHR5	Q8VHR5 [333-354]		0	2625.3	Q8VHR5	Transcriptional repressor p66-beta [OS=Mus musculus]	Gatad2b	0.739197	-0.248371	-0.181953	0.101376	0.0338	0.4212	0.7593	0.3088	0.681387	0.599073	1	0.63515	0.679599	0.572118	0.0003512	0.003235	3.75
[R].NYQQNYQNSESGEK.[N]	1xTMT6plex [K14]; 1xTMT6plex [N-Term]; 1xPhospho [S9(100)]	2.67499e-07	7.97536e-05	1	1	3	88	P62960	P62960 [155-168]	P62960 1xPhospho [S163(100)]	0	2227.01	P62960	Nuclease-sensitive element-binding protein 1 [OS=Mus musculus]	Ybx1	0.738018	-0.183581	-0.320104	-0.474029	0.0339	0.5823	0.3383	0.1455	0.59795	0.599563	1	0.830542	0.748507	0.659071	1.072e-05	7.33e-09	5.53
[K].ALSRSNEQIVSEK.[S]	1xTMT6plex [K13]; 1xTMT6plex [N-Term]; 1xPhospho [S5(99.1)]	0.0201924	0.00207142	1	2	1	1	P27321	P27321 [118-130]	P27321 1xPhospho [S122(99.1)]	1	1999.06	P27321	Calpastatin [OS=Rattus norvegicus]	Cast	0.737159	0.321357	-0.0748167	-0.16515	0.034	0.0785	0.7958	0.7717	0.669495	0.59992	1	0.750693	0.631852	0.789502	0.0007375	0.007756	4.15
[K].GTTKESSEK.[D]	2xTMT6plex [K4; K9]; 1xTMT6plex [N-Term]; 1xPhospho [S6(100)]	0.00450633	0.000769263	1	1	2	5	Q6AYK1	Q6AYK1 [47-55]	Q6AYK1 1xPhospho [S52(100)]	1	1733.93	Q6AYK1	RNA-binding protein with serine-rich domain 1 [OS=Rattus norvegicus]	Rnps1	-0.831353	-0.746597	0.155604	0.222353	0.034	0.036	0.1381	0.1089	1	0.984999	0.553572	0.857166	0.88429	0.527044	0.000159	0.001304	2.38
[K].DNTSDTASAIVPSTTPSVDSDDESFSK.[D]	1xTMT6plex [K27]; 1xTMT6plex [N-Term]; 1xPhospho [S20(100)]	1.24672e-11	7.97536e-05	1	1	2	9	Q3B7T9	Q3B7T9 [186-212]	Q3B7T9 1xPhospho [S205(100)]	0	3311.51	Q3B7T9	Rab11 family-interacting protein 1 [OS=Rattus norvegicus]	Rab11fip1	-0.830537	-0.67683	0.06637	-0.228695	0.0341	0.0463	0.2994	0.5748	0.853407	0.918375	0.516421	1	0.877083	0.548649	1.072e-05	3.61e-14	6.94
[R].SMSPPPK.[R]	1xTMT6plex [K7]; 1xTMT6plex [N-Term]; 1xPhospho [S3(100)]	0.0422508	0.0030278	1	1	2	14	Q3TWW8	Q3TWW8 [314-320]	Q3TWW8 1xPhospho [S316(100)]	0	1281.67	Q3TWW8	Serine/arginine-rich splicing factor 6 [OS=Mus musculus]	Srsf6	-0.829292	-0.541758	0.0661619	-0.162823	0.0342	0.0897	0.2997	0.7807	0.866664	1	0.562805	0.970209	0.955176	0.656142	0.001225	0.01256	1.02
[K].TNHKDSQDEVK.[S]	2xTMT6plex [K4; K11]; 1xTMT6plex [N-Term]; 1xPhospho [S6(100)]	0.0271327	0.00238122	1	1	1	1	Q811L6	Q811L6 [2036-2046]	Q811L6 1xPhospho [S2041(100)]	1	2068.07	Q811L6	Microtubule-associated serine/threonine-protein kinase 4 [OS=Mus musculus]	Mast4	0.736235	0.0697486	0.0833978	0.159731	0.0343	0.5582	0.2609	0.1919	0.651372	0.600304	1	0.583103	0.566586	0.594651	0.0009198	0.008341	1.58
[K].RLQESQSPELVQK.[Y]	1xTMT6plex [K13]; 1xTMT6plex [N-Term]; 1xPhospho [S7(100)]	9.04269e-07	7.97536e-05	1	1	1	5	Q5RKH6	Q5RKH6 [502-514]	Q5RKH6 1xPhospho [S508(100)]	1	2080.12	Q5RKH6	Protein os-9 [OS=Rattus norvegicus]	Os9	0.736079	-0.0995804	-0.361473	-0.431239	0.0344	0.8427	0.2631	0.1872	0.650211	0.600369	1	0.876739	0.771316	0.719872	1.072e-05	3.257e-08	5.32
[R].EAAAAAAPTAGALYSGSEGDSESGEEEELGAER.[R]	1xTMT6plex [N-Term]; 4xPhospho [Y14(94.1); S15(94.1); S23(99.9); S/T]	1.74522e-05	7.97536e-05	1	1	1	1	Q9JM73	Q9JM73 [59-91]	Q9JM73 4xPhospho [Y72(94.1); S73(94.1); S81(99.9); S/T]	0	3731.42	Q9JM73	Serum response factor [OS=Mus musculus]	Srf	0.73547	-0.063929	-0.190725	-0.0965221	0.0345	0.9693	0.7236	0.9707	0.646947	0.600622	1	0.691711	0.685512	0.655799	1.072e-05	1.226e-06	3.07
[R].SFTSGPGAR.[I]	1xTMT6plex [N-Term]; 1xPhospho [S1(100)]	0.00278161	0.000587017	1	2	1	4	P11679	P11679 [24-32]	P11679 1xPhospho [S24(100)]	0	1188.56	P11679	Keratin, type II cytoskeletal 8 [OS=Mus musculus]	Krt8	0.735387	0.457085	-0.11733	0.11335	0.0346	0.0227	0.9803	0.2819	0.62415	0.600657	1	0.576988	0.651548	0.894422	0.0001035	0.0007176	3.11
[R].HRSGDALATVVVK.[Q]	1xTMT6plex [K13]; 1xTMT6plex [N-Term]; 1xPhospho [S3(100)]	2.30259e-07	7.97536e-05	1	1	1	8	Q5M9G6	Q5M9G6 [16-28]	Q5M9G6 1xPhospho [S18(100)]	1	1891.06	Q5M9G6	Smad nuclear interacting protein 1 [OS=Rattus norvegicus]	Snip1; LOC100912429; NEWGENE_1359268	0.735356	-0.0187127	-0.313231	0.191401	0.0347	0.8657	0.3538	0.1443	0.740427	0.60067	1	0.648432	0.746325	0.736707	1.072e-05	6.071e-09	5.71
[K].QLTQDMSTQRAVQTEK.[E]	1xOxidation [M6]; 1xTMT6plex [K16]; 1xTMT6plex [N-Term]; 1xPhospho [S/T]	0.0391953	0.0034251	1	1	1	2	Q8BKX6	Q8BKX6 [3375-3390]		1	2418.21	Q8BKX6	Serine/threonine-protein kinase SMG1 [OS=Mus musculus]	Smg1	-0.824618	-0.512472	0.360732	0.373049	0.0348	0.1063	0.0176	0.0265	1	0.887133	0.500903	0.772149	0.690872	0.484315	0.001373	0.01695	1.61
[R].DLPSPLPTK.[R]	1xTMT6plex [K9]; 1xTMT6plex [N-Term]; 1xPhospho [S4(100)]	0.00366257	0.000710363	1	2	1	6	Q63430	Q63430 [45-53]	Q63430 1xPhospho [S48(100)]	0	1505.84	Q63430	Cold shock domain-containing protein C2 [OS=Rattus norvegicus]	Csdc2	0.734926	0.218025	-0.119112	-0.192171	0.0349	0.1964	0.9875	0.6866	0.659893	0.600849	1	0.753916	0.652561	0.75902	0.000135	0.001011	2.27
[K].VPTISITSFHSQSSYISSDNDSEFEDADIKK.[E]	2xTMT6plex [K30; K31]; 1xTMT6plex [N-Term]; 3xPhospho [S22(98.6); S/Y/T]	9.00043e-07	7.97536e-05	1	7	1	1	Q3UH66-4	Q3UH66-4 [1810-1840]	Q3UH66-4 3xPhospho [S1831(98.6); S/Y/T]	1	4375	Q3UH66-4	Isoform 4 of Serine/threonine-protein kinase WNK2 [OS=Mus musculus]	Wnk2	0.734384	0.206897	0.0223886	-0.173225	0.035	0.2153	0.4201	0.7462	0.59727	0.601075	1	0.673467	0.591819	0.683079	1.072e-05	3.231e-08	5.14
[R].TASGSSVTSLEGTR.[S]	1xTMT6plex [N-Term]; 1xPhospho [S3(100)]	0.00269898	0.00025721	2	2	3	11	Q6JE36; Q62433	Q6JE36 [328-341]; Q62433 [328-341]	Q6JE36 1xPhospho [S330(100)]; Q62433 1xPhospho [S330(100)]	0	1661.79	Q6JE36	Protein NDRG1 [OS=Rattus norvegicus]	Ndrg1	-0.819852	-0.181905	0.109479	0.00641775	0.0351	0.5871	0.21	0.5899	0.972589	1	0.5665	0.968272	0.926923	0.817118	0.0001565	0.0009165	4.88
[R].SVERLPSVEEAEVSKPSPPASK.[D]	2xTMT6plex [K15; K22]; 1xTMT6plex [N-Term]; 1xPhospho [S7(100)]	0.00112114	0.000160309	1	1	1	1	P57016	P57016 [56-77]	P57016 1xPhospho [S62(100)]	1	3090.67	P57016	Ladinin-1 [OS=Mus musculus]	Lad1	0.733042	0.0849057	0.179571	0.417119	0.0352	0.5097	0.1085	0.0168	0.731437	0.601634	1	0.547787	0.531222	0.563424	0.0001209	0.0004587	4.2
[K].REDSEVQNESDGHADRK.[G]	1xTMT6plex [K17]; 1xTMT6plex [N-Term]; 1xPhospho [S10(100)]	5.43339e-05	5.91125e-05	1	1	1	2	Q3SWT4	Q3SWT4 [286-302]	Q3SWT4 1xPhospho [S295(100)]	2	2510.17	Q3SWT4	protein IWS1 homolog [OS=Rattus norvegicus]	Iws1	-0.81763	-0.184267	0.224281	-0.0798476	0.0353	0.5803	0.0693	0.9018	0.895297	1	0.567373	0.946245	0.856022	0.753381	5.325e-05	5.088e-05	4.89
[R].SKSPPKSPEEEGAVSS.[-]	2xTMT6plex [K2; K6]; 1xTMT6plex [N-Term]; 1xPhospho [S3(100)]	0.0209677	0.00178361	1	1	1	4	Q6PDU1	Q6PDU1 [206-221]	Q6PDU1 1xPhospho [S208(100)]	2	2383.24	Q6PDU1	serine/arginine-rich splicing factor 2 [OS=Rattus norvegicus]	Srsf2	0.732118	0.161594	0.105581	0.256096	0.0354	0.3054	0.2169	0.0779	0.622105	0.60202	1	0.52092	0.559535	0.625853	0.0006981	0.006547	2.65
[K].IDEPDTPYHNMIGDDEDVCSDSEGNEVMTPEILAK.[K]	1xCarbamidomethyl [C19]; 1xOxidation [M]; 1xTMT6plex [K35]; 1xTMT6plex [N-Term]; 1xPhospho [S22(100)]	1.49294e-08	7.97536e-05	1	1	4	7	P50411	P50411 [68-102]	P50411 1xPhospho [S89(100)]	0	4489.97	P50411	Protein phosphatase inhibitor 2 [OS=Rattus norvegicus]	Ppp1r2	0.731169	-0.469857	-0.410559	-0.248347	0.0355	0.1307	0.1962	0.5211	0.617018	0.602416	1	0.732922	0.800731	0.578157	1.072e-05	2.133e-10	4.55
[K].ARHDTPDASPPRR.[V]	1xTMT6plex [N-Term]; 2xPhospho [T5(100); S9(100)]	0.0119034	0.00125084	1	1	1	1	Q4QQU1	Q4QQU1 [127-139]	Q4QQU1 2xPhospho [T131(100); S135(100)]	2	1864.84	Q4QQU1	BUD13 homolog [OS=Rattus norvegicus]	Bud13	0.730604	-0.00991852	-0.116419	0.123942	0.0356	0.8322	0.9763	0.2576	0.65447	0.602651	1	0.600591	0.653298	0.648822	0.0004391	0.00376	2.94
[K].WGQPPSPTPVPRPPDADPNTPSPKPLEGRPER.[Q]	1xTMT6plex [K24]; 1xTMT6plex [N-Term]; 1xPhospho [S22(100)]	5.50351e-07	7.97536e-05	1	1	2	5	Q6PDQ2	Q6PDQ2 [503-534]	Q6PDQ2 1xPhospho [S524(100)]	0	4008.05	Q6PDQ2	Chromodomain-helicase-DNA-binding protein 4 [OS=Mus musculus]	Chd4	0.730271	-0.388786	-0.493057	-0.0363845	0.0357	0.2009	0.1163	0.7409	0.751517	0.602791	1	0.770712	0.848382	0.64797	1.072e-05	1.771e-08	5.88
[R].GYPGSIGPTGAAGAPGPHGSVGPAGK.[H]	1xTMT6plex [K26]; 1xTMT6plex [N-Term]; 1xPhospho [S20(99.9)]	0.0224753	0.00219873	1	1	1	1	Q01149	Q01149 [955-980]	Q01149 1xPhospho [S974(99.9)]	0	2755.4	Q01149	Collagen alpha-2(I) chain [OS=Mus musculus]	Col1a2	0.729639	-0.047671	-0.244369	-0.316609	0.0358	0.9736	0.54	0.3589	0.712017	0.603055	1	0.886746	0.714363	0.691144	0.0008114	0.008856	2.34
[R].TSGSSSSDVTK.[A]	1xTMT6plex [K11]; 1xTMT6plex [N-Term]; 1xPhospho [S4(100)]	0.000334091	7.97536e-05	1	3	3	4	Q5SXY1-1	Q5SXY1-1 [310-320]	Q5SXY1-1 1xPhospho [S313(100)]	0	1593.78	Q5SXY1-1	Cytospin-B [OS=Mus musculus]	Specc1	0.729552	0.0323744	-0.492453	-0.300614	0.0359	0.6827	0.1171	0.3938	0.694835	0.603091	1	0.855806	0.84845	0.867704	1.072e-05	4.653e-05	2.57
[K].TVQAGDSPSAVR.[S]	1xTMT6plex [N-Term]; 1xPhospho [S7(100)]	0.00704763	0.000930136	1	4	1	1	Q8VHF2-1	Q8VHF2-1 [747-758]	Q8VHF2-1 1xPhospho [S753(100)]	0	1496.73	Q8VHF2-1	Cadherin-related family member 5 [OS=Mus musculus]	Cdhr5	0.728685	0.178208	-0.403374	-0.81819	0.036	0.2673	0.2038	0.0269	0.559299	0.603454	1	0.986152	0.798126	0.903062	0.0002594	0.002174	2.15
[R].RYSPSPPPK.[R]	1xTMT6plex [K9]; 1xTMT6plex [N-Term]; 2xPhospho [S3(100); S5(100)]	0.00462457	0.000431335	1	2	1	7	Q52KI8-1	Q52KI8-1 [622-630]	Q52KI8-1 2xPhospho [S624(100); S626(100)]	1	1646.81	Q52KI8-1	Serine/arginine repetitive matrix protein 1 [OS=Mus musculus]	Srrm1	-0.805766	0.237282	0.0585847	0.274076	0.0361	0.1678	0.3201	0.0659	0.943989	0.8835	0.505414	0.780659	0.848342	1	0.0002109	0.00147	3.71
[K].LEKLSAAEEIQGDGPK.[K]	2xTMT6plex [K3; K16]; 1xTMT6plex [N-Term]; 1xPhospho [S5(100)]	0.0705056	0.0055514	1	1	1	1	Q3TC46	Q3TC46 [440-455]	Q3TC46 1xPhospho [S444(100)]	1	2452.33	Q3TC46	Protein PAT1 homolog 1 [OS=Mus musculus]	Patl1	0.727776	-0.107059	0.244036	-0.247046	0.0362	0.8157	0.0594	0.5241	0.518652	0.603834	1	0.615523	0.509866	0.473399	0.002287	0.03211	2.28
[K].KEESEESDDDMGFGLFD.[-]	1xOxidation [M11]; 1xTMT6plex [K1]; 1xTMT6plex [N-Term]; 1xPhospho [S7(100)]	2.89674e-07	7.97536e-05	1	2	2	46	P02401	P02401 [99-115]	P02401 1xPhospho [S105(100)]	1	2504.05	P02401	60S acidic ribosomal protein P2 [OS=Rattus norvegicus]	Rplp2; LOC100911575	0.725856	0.0901955	-0.22032	-0.634465	0.0363	0.4953	0.6182	0.0605	0.519654	0.604638	1	0.806692	0.704399	0.749843	1.072e-05	8.066e-09	5.3
[K].TSEVYSDDEEEEDDDKSSEK.[S]	2xTMT6plex [K16; K20]; 1xTMT6plex [N-Term]; 1xPhospho [S/T/Y]	0.00204746	0.00046153	1	1	1	3	A2AQ19	A2AQ19 [313-332]		1	3103.36	A2AQ19	RNA polymerase-associated protein RTF1 homolog [OS=Mus musculus]	Rtf1	0.72578	0.0964682	-0.195752	-0.060203	0.0363	0.4768	0.7042	0.8284	0.642712	0.60467	1	0.670099	0.692541	0.740433	6.971e-05	0.0004805	2.82
[K].TNNIAYEDVVGGEDWSPMEEK.[I]	1xOxidation [M18]; 1xTMT6plex [K21]; 1xTMT6plex [N-Term]; 1xPhospho [S16(100)]	1.78249e-05	3.88506e-05	1	1	1	2	P10362	P10362 [238-258]	P10362 1xPhospho [S253(100)]	0	2937.33	P10362	Secretogranin-2 [OS=Rattus norvegicus]	Scg2	0.72569	-0.230595	-0.105914	-0.0974636	0.0364	0.4642	0.9283	0.9738	0.638575	0.604708	1	0.683206	0.650772	0.554642	1.413e-05	1.802e-05	4.73
[K].RTPSEAER.[W]	1xTMT6plex [N-Term]; 1xPhospho [S4(100)]	0.00782872	0.00104516	1	2	1	11	O08919	O08919 [408-415]	O08919 1xPhospho [S411(100)]	1	1254.6	O08919	Numb-like protein [OS=Mus musculus]	Numbl	-0.795784	-0.87294	0.0937754	0.14739	0.0365	0.022	0.2401	0.2143	0.891236	1	0.57603	0.804682	0.937067	0.51167	0.0003127	0.002434	2.86
[K].EEPVVTAQPSPSSSSSSSSSSASDSDVSIK.[K]	1xTMT6plex [K30]; 1xTMT6plex [N-Term]; 1xPhospho [S23(87.6)]	1.74522e-05	7.97536e-05	2	2	2	4	Q925G1; Q925G1-2	Q925G1 [244-273]; Q925G1-2 [244-273]	Q925G1 1xPhospho [S266(87.6)]; Q925G1-2 1xPhospho [S266(87.6)]	0	3464.62	Q925G1	Hepatoma-derived growth factor-related protein 2 [OS=Rattus norvegicus]	Hdgfrp2; Hdgfl2	0.724924	0.156891	-0.25425	0.0997011	0.0366	0.3166	0.5079	0.3126	0.716526	0.605029	1	0.668681	0.721628	0.80453	1.072e-05	1.224e-06	3.15
[K].ENTPPTLSSAR.[V]	1xTMT6plex [N-Term]; 1xPhospho [T3(100)]	0.00434472	0.000769263	1	1	1	4	Q4KLN6	Q4KLN6 [31-41]	Q4KLN6 1xPhospho [T33(100)]	0	1481.72	Q4KLN6	ribonucleoside-diphosphate reductase subunit M2 [OS=Rattus norvegicus]	Rrm2	0.724754	0.443717	0.101169	0.244767	0.0367	0.0263	0.2257	0.0877	0.612533	0.6051	1	0.516949	0.564121	0.767264	0.000151	0.001246	2.51
[K].EPAAPASPAPSPVPSPTPAQPQK.[E]	1xTMT6plex [K23]; 1xTMT6plex [N-Term]; 3xPhospho [S7(100); S11(100); S15(100)]	4.09699e-07	7.97536e-05	1	2	1	10	A2AJI0	A2AJI0 [538-560]	A2AJI0 3xPhospho [S544(100); S548(100); S552(100)]	0	2920.37	A2AJI0	MAP7 domain-containing protein 1 [OS=Mus musculus]	Map7d1; Mtap7d1	0.723481	-0.27484	-0.0544496	0.0471373	0.0368	0.3662	0.7093	0.4574	0.64504	0.605634	1	0.624305	0.628929	0.519836	1.072e-05	1.231e-08	5.51
[K].MNTPSQSPHK.[D]	1xTMT6plex [K10]; 1xTMT6plex [N-Term]; 1xPhospho [S7(100)]	0.006514	0.000874552	1	2	1	4	O08648-1	O08648-1 [110-119]	O08648-1 1xPhospho [S116(100)]	0	1664.82	O08648-1	Mitogen-activated protein kinase kinase kinase 4 [OS=Mus musculus]	Map3k4	0.723017	-0.478254	-0.301255	0.246843	0.0369	0.1238	0.3805	0.0858	0.745948	0.605829	1	0.628639	0.746512	0.535881	0.0002535	0.001993	3.07
[K].SPTIPR.[A]	1xTMT6plex [N-Term]; 1xPhospho [S1(100)]	0.0891231	0.00636892	1	1	1	4	Q99LJ0	Q99LJ0 [567-572]	Q99LJ0 1xPhospho [S567(100)]	0	979.518	Q99LJ0	CTTNBP2 N-terminal-like protein [OS=Mus musculus]	Cttnbp2nl	-0.787084	-0.825975	-0.896357	-0.499319	0.037	0.026	0.0151	0.1268	0.651983	0.537242	0.311339	0.921608	1	0.564101	0.002095	0.02499	1.84
[R].EADEDSEPEREVR.[A]	1xTMT6plex [N-Term]; 1xPhospho [S6(100)]	0.000141429	7.97536e-05	1	1	1	5	Q3TIX9	Q3TIX9 [76-88]	Q3TIX9 1xPhospho [S81(100)]	1	1869.81	Q3TIX9	U4/U6.U5 tri-snRNP-associated protein 2 [OS=Mus musculus]	Usp39	0.72194	-0.0396734	-0.162692	-0.282996	0.0371	0.9437	0.8305	0.4331	0.632557	0.606281	1	0.769644	0.678656	0.660247	1.072e-05	1.603e-05	2.75
[R].HMSESPNRK.[VI]	1xTMT6plex [K9]; 1xTMT6plex [N-Term]; 1xPhospho [S5(100)]	0.00535108	0.000816232	1	2	1	9	O55035	O55035 [409-417]	O55035 1xPhospho [S413(100)]	1	1623.81	O55035	peptidyl-prolyl cis-trans isomerase g [OS=Rattus norvegicus]	Ppig	-0.785756	-0.561582	0.0041301	0.157516	0.0372	0.0809	0.4854	0.1953	0.985523	1	0.580048	0.883588	0.997141	0.675622	0.0001905	0.001591	3.31
[R].GRNDSGEENVPLDLTREPSDNLR.[E]	1xTMT6plex [N-Term]; 1xPhospho [S5(100)]	8.025e-08	7.97536e-05	1	1	1	1	Q6QI06	Q6QI06 [17-39]	Q6QI06 1xPhospho [S21(100)]	2	2892.37	Q6QI06	Rapamycin-insensitive companion of mTOR [OS=Mus musculus]	Rictor	0.721371	-0.162392	-0.500266	-0.444262	0.0373	0.6427	0.112	0.1741	0.710996	0.606521	1	0.967394	0.857908	0.766577	1.072e-05	1.668e-09	5.61
[R].IGELGAPEVWGLSPK.[IN]	1xTMT6plex [K15]; 1xTMT6plex [N-Term]; 1xPhospho [S13(100)]	9.38802e-07	7.97536e-05	1	3	1	23	Q9D0F4	Q9D0F4 [135-149]	Q9D0F4 1xPhospho [S147(100)]	0	2091.13	Q9D0F4	NF-kappa-B-activating protein [OS=Mus musculus]	Nkap	-0.783263	-0.586806	0.135237	-0.411042	0.0374	0.07	0.1668	0.21	0.75208	0.893439	0.519134	1	0.813495	0.541637	1.072e-05	3.397e-08	4.66
[K].SSTSVDLESDGKDSVPASPGASAADVPAETEPSKPSSK.[Q]	3xTMT6plex [K12; K34; K38]; 1xTMT6plex [N-Term]; 2xPhospho [S14(100); S18(100)]	1.59442e-12	7.97536e-05	1	1	1	5	P41516	P41516 [1370-1407]	P41516 2xPhospho [S1383(100); S1387(100)]	1	4764.32	P41516	DNA topoisomerase 2-alpha [OS=Rattus norvegicus]	Top2a	0.720494	0.328886	0.202856	0.713156	0.0375	0.0727	0.0853	0.0012	0.735505	0.60689	1	0.448647	0.527284	0.662291	1.072e-05	2.904e-15	7.7
[K].LYSILQGDSPTK.[W]	1xTMT6plex [K12]; 1xTMT6plex [N-Term]; 1xPhospho [S9(100)]	0.00332372	0.000655236	1	3	1	2	Q6NV83-1	Q6NV83-1 [477-488]	Q6NV83-1 1xPhospho [S485(100)]	0	1859.99	Q6NV83-1	U2 snRNP-associated SURP motif-containing protein [OS=Mus musculus]	U2surp	0.720465	0.713474	-0.0772886	0.0244417	0.0376	0.0018	0.8057	0.5304	0.64764	0.578038	0.952442	0.63676	0.60985	1	0.0001204	0.0008954	2.54
[R].TAPTSTIAPGVVMASSPALPTQPAEEAARK.[R]	1xTMT6plex [K30]; 1xTMT6plex [N-Term]; 1xPhospho [S/T]	5.88816e-05	7.97536e-05	1	4	1	1	Q01147-1	Q01147-1 [256-285]		1	3487.83	Q01147-1	Cyclic AMP-responsive element-binding protein 1 [OS=Mus musculus]	Creb1	0.719729	-0.0435005	-0.135116	-0.270003	0.0377	0.9587	0.9481	0.4625	0.681385	0.607211	1	0.821621	0.666828	0.647022	1.072e-05	5.437e-06	3.33
[K].TQHSSLDQSSPPQSGVSASYNHPVLGMYDAK.[D]	1xOxidation [M27]; 1xTMT6plex [K31]; 1xTMT6plex [N-Term]; 1xPhospho [S5(100)]	4.72724e-05	7.97536e-05	1	3	2	5	Q99P99	Q99P99 [205-235]	Q99P99 1xPhospho [S209(100)]	0	3842.81	Q99P99	Histone deacetylase 4 [OS=Rattus norvegicus]	Hdac4	0.719647	0.366375	0.085517	0.429793	0.0378	0.0524	0.2562	0.0151	0.682139	0.607246	1	0.506399	0.572297	0.737754	1.072e-05	4.159e-06	4.28
[K].TADDGCLENAPDTAEFSREFQLDQHLFDPEHDYPGLGK.[W]	1xCarbamidomethyl [C6]; 1xTMT6plex [K38]; 1xTMT6plex [N-Term]; 1xPhospho [S17(98.1)]	8.81403e-10	7.97536e-05	1	2	2	2	P27682	P27682 [123-160]	P27682 1xPhospho [S139(98.1)]	1	4873.21	P27682	Neuroendocrine protein 7B2 [OS=Rattus norvegicus]	Scg5	0.71936	-0.185074	-0.386448	-0.493385	0.0379	0.5782	0.2272	0.1315	0.626286	0.607367	1	0.881651	0.793933	0.698346	1.072e-05	6.634e-12	6.57
[K].ELTAEK.[R]	1xTMT6plex [K6]; 1xTMT6plex [N-Term]; 1xPhospho [T3(100)]	0.0977804	0.00710735	2	2	1	3	P10354; P26339	P10354 [370-375]; P26339 [367-372]	P10354 1xPhospho [T372(100)]; P26339 1xPhospho [T369(100)]	0	1228.66	P10354	Chromogranin-A [OS=Rattus norvegicus]	Chga	0.718937	-0.287632	-0.332799	-0.558678	0.038	0.3432	0.313	0.0905	0.604024	0.607545	1	0.889678	0.765176	0.626867	0.002269	0.02736	1.97
[R].SNSSEASSGDFLDLK.[G]	1xTMT6plex [K15]; 1xTMT6plex [N-Term]; 2xPhospho [S7(98.4); S]	0.000205931	7.97536e-05	1	2	2	2	Q6AXU6	Q6AXU6 [80-94]	Q6AXU6 2xPhospho [S86(98.4); S]	0	2174.97	Q6AXU6	Jupiter microtubule associated homolog 1 [OS=Rattus norvegicus]	Hn1; Jpt1	-0.776141	-0.354441	0.0996129	-0.41049	0.0381	0.2395	0.2283	0.2111	0.752368	0.885857	0.517275	1	0.826755	0.646666	1.072e-05	2.545e-05	3.88
[K].DTMTAQNTGVSTLYRNSYGAPAEDIK.[Q]	1xTMT6plex [K26]; 1xTMT6plex [N-Term]; 1xPhospho [T/S/Y]	9.23219e-06	7.97536e-05	1	2	2	2	O35927	O35927 [1133-1158]		1	3341.61	O35927	Catenin delta-2 [OS=Mus musculus]	Ctnnd2	0.717819	-0.286982	-0.330738	-0.133114	0.0382	0.3445	0.3176	0.8858	0.719819	0.608016	1	0.789395	0.764675	0.626739	1.072e-05	5.606e-07	4.51
[K].GEEAAAGSGEDAGK.[C]	1xTMT6plex [K14]; 1xTMT6plex [N-Term]; 1xPhospho [S8(100)]	7.76338e-06	7.97536e-05	1	1	1	3	P51860	P51860 [62-75]	P51860 1xPhospho [S69(100)]	0	1786.83	P51860	Nucleosome assembly protein 1-like 2 [OS=Mus musculus]	Nap1l2	-0.77371	-0.356668	0.0543168	-0.202657	0.0383	0.2375	0.3314	0.6525	0.868949	0.918966	0.537514	1	0.885011	0.691163	1.072e-05	4.525e-07	3.29
[R].RRHSGQDVHVVLK.[L]	1xTMT6plex [K13]; 1xTMT6plex [N-Term]; 1xPhospho [S4(100)]	0.00711065	0.000746729	1	4	1	18	O35987	O35987 [173-185]	O35987 1xPhospho [S176(100)]	2	2069.15	O35987	NSFL1 cofactor p47 [OS=Rattus norvegicus]	Nsfl1c	-0.772789	-0.321142	0.244104	-0.268577	0.0384	0.2873	0.0593	0.4662	0.830138	0.971939	0.568861	1	0.820647	0.656875	0.0002961	0.002259	3.24
[R].SQEEAPGHR.[R]	1xTMT6plex [N-Term]; 1xPhospho [S1(100)]	5.54124e-05	7.97536e-05	1	1	1	71	P20156	P20156 [423-431]	P20156 1xPhospho [S423(100)]	0	1319.59	P20156	Neurosecretory protein VGF [OS=Rattus norvegicus]	Vgf	0.717057	-0.801186	-0.0460444	-0.190924	0.0385	0.0291	0.6784	0.69	0.676411	0.608337	1	0.772119	0.628066	0.360433	1.072e-05	5.036e-06	3.64
[K].NYLNYDEEGDQGR.[W]	1xTMT6plex [N-Term]; 2xPhospho [Y2(100); Y5(100)]	0.0192025	0.00161424	1	1	1	1	O35314	O35314 [465-477]	O35314 2xPhospho [Y466(100); Y469(100)]	0	1961.75	O35314	Secretogranin-1 [OS=Rattus norvegicus]	Chgb	0.716529	-0.20538	-0.312862	-0.267038	0.0386	0.5213	0.3547	0.4712	0.596426	0.60856	1	0.7177	0.755935	0.65563	0.0006277	0.006033	1.45
[K].KLNSDEEGESSGK.[R]	2xTMT6plex [K1; K13]; 1xTMT6plex [N-Term]; 1xPhospho [S4(100)]	6.1584e-07	7.97536e-05	1	2	1	47	Q641X2	Q641X2 [639-651]	Q641X2 1xPhospho [S642(100)]	1	2147.08	Q641X2	RNA polymerase-associated protein LEO1 [OS=Rattus norvegicus]	Leo1	-0.77044	-0.932362	0.0744586	-0.346791	0.0386	0.0176	0.2794	0.3025	0.786331	0.916401	0.53723	1	0.870304	0.456039	1.072e-05	2.035e-08	4.77
[K].SGSMEEDVDTSPGGDYYTSPNSPTSSSR.[N]	1xTMT6plex [N-Term]; 1xPhospho [S22(100)]	1.48596e-08	7.97536e-05	1	5	1	3	P70255-1	P70255-1 [284-311]	P70255-1 1xPhospho [S305(100)]	0	3219.31	P70255-1	Nuclear factor 1 C-type [OS=Mus musculus]	Nfic	0.716105	-0.282847	-0.037323	-0.0560873	0.0387	0.3516	0.6433	0.8133	0.598802	0.608739	1	0.62254	0.624692	0.513477	1.072e-05	2.117e-10	5.76
[R].QSLGESPR.[T]	1xTMT6plex [N-Term]; 1xPhospho [S6(100)]	0.00366257	0.000710363	1	4	1	4	Q8K4G5	Q8K4G5 [465-472]	Q8K4G5 1xPhospho [S470(100)]	0	1182.57	Q8K4G5	Actin-binding LIM protein 1 [OS=Mus musculus]	Ablim1	-0.768241	-0.360285	0.388964	-0.00737905	0.0388	0.233	0.0136	0.6381	0.84579	1	0.587133	0.850127	0.763678	0.594913	0.000135	0.001012	2.8
[R].YRDVSPFDHSR.[I]	1xTMT6plex [N-Term]; 1xPhospho [S5(100)]	0.00230502	0.000525785	1	2	1	2	P20417	P20417 [46-56]	P20417 1xPhospho [S50(100)]	1	1687.78	P20417	Tyrosine-protein phosphatase non-receptor type 1 [OS=Rattus norvegicus]	Ptpn1	0.715349	0.618197	-0.442344	-0.195006	0.0389	0.0053	0.1623	0.6769	0.528962	0.479452	0.787203	0.605519	0.651485	1	8.648e-05	0.000563	3.05
[R].NQSDLDDQHDYDSVASDEDTDQEPLPSAGATR.[N]	1xTMT6plex [N-Term]; 1xPhospho [S16(99.2)]	1.32208e-14	7.97536e-05	1	1	3	10	Q9Z272	Q9Z272 [382-413]	Q9Z272 1xPhospho [S397(99.2)]	0	3800.59	Q9Z272	ARF GTPase-activating protein GIT1 [OS=Rattus norvegicus]	Git1	0.715301	-0.0704649	-0.198021	-0.0537884	0.039	0.9456	0.6953	0.8042	0.668248	0.609078	1	0.693633	0.698688	0.665383	1.072e-05	8.163e-18	8.47
[R].FKTQPVTFDEIQEVEEEGVSPMEEEK.[A]	2xTMT6plex [K2; K26]; 1xTMT6plex [N-Term]; 2xPhospho [T3(100); S20(100)]	0.103314	0.00774305	1	2	1	1	A8IHN8	A8IHN8 [173-198]	A8IHN8 2xPhospho [T175(100); S192(100)]	1	3901.84	A8IHN8	Uncharacterized protein C11orf96 homolog [OS=Rattus norvegicus]	RGD1564664	0.714936	-0.553775	-0.261906	-0.15091	0.0391	0.0846	0.4832	0.8224	0.628954	0.609232	1	0.698308	0.730507	0.497647	0.003263	0.04996	4.49
[K].GSLEPEATPPGK.[R]	1xTMT6plex [K12]; 1xTMT6plex [N-Term]; 1xPhospho [T8(100)]	4.07042e-05	7.97536e-05	1	1	1	2	Q3TV65	Q3TV65 [204-215]	Q3TV65 1xPhospho [T211(100)]	0	1720.89	Q3TV65	MPN domain-containing protein [OS=Mus musculus]	Mpnd	0.714312	0.298724	0.0375371	0.157292	0.0392	0.0995	0.3771	0.1957	0.635916	0.609496	1	0.57023	0.593842	0.730459	1.072e-05	3.465e-06	4.18
[K].SNGPTPELLASSPPDNK.[S]	1xTMT6plex [K17]; 1xTMT6plex [N-Term]; 1xPhospho [S12(99.3)]	9.01109e-05	5.91125e-05	1	2	1	1	F1LYQ8	F1LYQ8 [865-881]	F1LYQ8 1xPhospho [S876(99.3)]	0	2262.14	F1LYQ8	FERM, RhoGEF and pleckstrin domain-containing protein 1 [OS=Rattus norvegicus]	Farp1	0.71351	-0.306711	-0.108651	-0.398615	0.0393	0.3113	0.9411	0.2258	0.596579	0.609835	1	0.786435	0.657536	0.531606	5.611e-05	7.521e-05	4.59
[R].VSGADGYETEGIR.[G]	1xTMT6plex [N-Term]; 1xPhospho [T9(100)]	1.47192e-06	7.97536e-05	1	1	1	5	P97311	P97311 [270-282]	P97311 1xPhospho [T278(100)]	0	1662.76	P97311	DNA replication licensing factor MCM6 [OS=Mus musculus]	Mcm6	-0.761541	-1.312	-0.271273	-0.585506	0.0394	0.0059	0.4553	0.0775	0.666416	0.757994	0.447115	1	0.914802	0.368448	1.072e-05	5.895e-08	4.62
[K].STGPATTSPR.[V]	1xTMT6plex [N-Term]; 1xPhospho [S1(100)]	0.00325172	0.000655236	1	1	4	8	Q7TPK1	Q7TPK1 [641-650]	Q7TPK1 1xPhospho [S641(100)]	0	1283.62	Q7TPK1	E3 ubiquitin-protein ligase UHRF1 [OS=Rattus norvegicus]	Uhrf1	0.7128	-0.0898993	0.21001	0.678678	0.0395	0.8762	0.0793	0.0016	0.710999	0.610135	1	0.444188	0.527481	0.495615	0.0001204	0.0008745	2.41
[K].SLEAASEKYSEK.[E]	2xTMT6plex [K8; K12]; 1xTMT6plex [N-Term]; 1xPhospho [S10(98.2)]	0.0486644	0.00359771	1	2	1	1	P09495	P09495 [170-181]	P09495 1xPhospho [S179(98.2)]	1	2109.11	P09495	Tropomyosin alpha-4 chain [OS=Rattus norvegicus]	Tpm4	0.712263	0.268727	0.0473018	0.23115	0.0396	0.1279	0.3501	0.0999	0.702614	0.610362	1	0.598596	0.590675	0.711612	0.001396	0.01428	1.14
[R].SSGQLSGR.[S]	1xTMT6plex [N-Term]; 1xPhospho [S1(100)]	0.00428585	0.000769263	2	4	1	2	A2A7S8-4; A2A7S8-2	A2A7S8-4 [431-438]; A2A7S8-2 [476-483]	A2A7S8-4 1xPhospho [S431(100)]; A2A7S8-2 1xPhospho [S476(100)]	0	1100.53	A2A7S8-4	Isoform 4 of Uncharacterized protein KIAA1522 [OS=Mus musculus]	C77080	-0.757281	-0.155865	-0.114515	-0.285521	0.0397	0.661	0.9684	0.4259	0.820445	0.874677	0.517468	1	0.946935	0.849963	0.000151	0.001227	2.12
[R].SHTSEGSR.[S]	1xTMT6plex [N-Term]; 1xPhospho [T3(100)]	0.00299353	0.000587017	1	2	4	47	Q6JE36	Q6JE36 [354-361]	Q6JE36 1xPhospho [T356(100)]	0	1169.51	Q6JE36	Protein NDRG1 [OS=Rattus norvegicus]	Ndrg1	-0.756827	-0.232714	0.274856	-0.234459	0.0398	0.4578	0.0421	0.559	0.850004	0.981976	0.58113	1	0.811635	0.690728	0.0001035	0.0007875	2.29
[R].HSTNAESILGTSSDLDEETPPPVPVK.[L]	1xTMT6plex [K26]; 1xTMT6plex [N-Term]; 1xPhospho [T/S]	5.60817e-09	7.97536e-05	1	1	4	5	Q9JM80	Q9JM80 [235-260]		0	3258.62	Q9JM80	Phosphoprotein associated with glycosphingolipid-enriched microdomains 1 [OS=Rattus norvegicus]	Cbp; Pag1	0.711163	0.00956447	-0.682944	-0.40731	0.0399	0.762	0.04	0.2156	0.746364	0.610828	1	0.989835	0.98063	0.987153	1.072e-05	6.43e-11	4.56
[R].VLSTSTDLEAAVADALLLGDAR.[S]	1xTMT6plex [N-Term]; 1xPhospho [S5(98.4)]	3.58543e-10	7.97536e-05	1	1	2	3	Q80TV8-2	Q80TV8-2 [811-832]	Q80TV8-2 1xPhospho [S815(98.4)]	0	2510.3	Q80TV8-2	Isoform 2 of CLIP-associating protein 1 [OS=Mus musculus]	Clasp1	0.709867	0.40677	-0.236285	-0.129776	0.04	0.0366	0.5679	0.896	0.692083	0.611377	1	0.757224	0.720175	0.954746	1.072e-05	2.204e-12	6.03
[R].RNSPAFLSTDLGDEDVGLGPPAPR.[M]	1xTMT6plex [N-Term]; 1xPhospho [S3(100)]	4.64985e-09	7.97536e-05	1	10	1	2	Q9QX74-2	Q9QX74-2 [718-741]	Q9QX74-2 1xPhospho [S720(100)]	1	2790.37	Q9QX74-2	Isoform 2 of SH3 and multiple ankyrin repeat domains protein 2 [OS=Rattus norvegicus]	Shank2	0.709487	-0.00164923	-0.187459	-0.246904	0.0401	0.8029	0.7361	0.5248	0.611539	0.611538	1	0.725687	0.696392	0.695596	1.072e-05	5.101e-11	6.48
[K].GNAEGSSDEEGK.[L]	1xTMT6plex [K12]; 1xTMT6plex [N-Term]; 2xPhospho [S6(100); S7(100)]	4.79399e-05	7.97536e-05	1	1	1	49	Q8VHK7	Q8VHK7 [127-138]	Q8VHK7 2xPhospho [S132(100); S133(100)]	0	1797.73	Q8VHK7	hepatoma-derived growth factor [OS=Rattus norvegicus]	Hdgf	0.708917	0.0277334	-0.328425	-0.27914	0.0402	0.7	0.3221	0.4424	0.708432	0.611779	1	0.859662	0.768176	0.783085	1.072e-05	4.214e-06	3.93
[K].KSPDLGEYDPLTQADSDESEDDLVLNLQQK.[N]	2xTMT6plex [K1; K30]; 1xTMT6plex [N-Term]; 2xPhospho [T/S/Y]	0.000731459	0.00013744	1	2	1	1	Q8BYI8-1	Q8BYI8-1 [15-44]		1	4210	Q8BYI8-1	Protein FAM234B [OS=Mus musculus]	8430419L09Rik; Fam234b	0.708542	-0.398605	-0.133872	0.0949601	0.0403	0.1896	0.9534	0.3241	0.74844	0.611938	1	0.700763	0.67144	0.509349	9.546e-05	0.0003317	3.34
[K].SNEHDHSK.[S]	1xTMT6plex [K8]; 1xTMT6plex [N-Term]; 1xPhospho [S1(100)]	0.000311865	7.97536e-05	1	2	2	11	O55035	O55035 [526-533]	O55035 1xPhospho [S526(100)]	0	1491.7	O55035	peptidyl-prolyl cis-trans isomerase g [OS=Rattus norvegicus]	Ppig	-0.746533	-0.785628	0.111364	0.0260174	0.0404	0.0309	0.2061	0.5253	0.878345	1	0.596034	0.862647	0.925712	0.537005	1.072e-05	4.263e-05	3
[K].ESVPEFPLSPPKK.[K]	2xTMT6plex [K12; K13]; 1xTMT6plex [N-Term]; 1xPhospho [S9(100)]	0.000101159	7.97536e-05	1	1	1	13	P13668	P13668 [30-42]	P13668 1xPhospho [S38(100)]	1	2222.24	P13668	Stathmin [OS=Rattus norvegicus]	Stmn1	0.707116	-0.0645598	0.0198685	-0.234806	0.0405	0.9673	0.4296	0.5579	0.579803	0.612543	1	0.682283	0.604165	0.577725	1.072e-05	1.06e-05	3.62
[K].GVDEQSESSEESEEEKPPEEDK.[E]	2xTMT6plex [K16; K22]; 1xTMT6plex [N-Term]; 4xPhospho [S6(100); S8(100); S9(100); S12(100)]	0.00220935	0.00046153	1	2	1	1	Q3THK3	Q3THK3 [300-321]	Q3THK3 4xPhospho [S305(100); S307(100); S308(100); S311(100)]	0	3500.38	Q3THK3	General transcription factor iif subunit 1 [OS=Mus musculus]	Gtf2f1	0.707019	-0.0198219	-0.278892	-0.158349	0.0406	0.8702	0.4336	0.7952	0.684007	0.612585	1	0.763358	0.743226	0.733084	7.896e-05	0.0005307	2.1
[R].RVESEESGDEEGK.[K]	1xTMT6plex [K13]; 1xTMT6plex [N-Term]; 1xPhospho [S7(100)]	0.00373116	0.000334627	1	2	1	2	Q5HZV9-1	Q5HZV9-1 [21-33]	Q5HZV9-1 1xPhospho [S27(100)]	1	1988.92	Q5HZV9-1	Protein phosphatase 1 regulatory subunit 7 [OS=Rattus norvegicus]	Ppp1r7	0.706683	-0.188229	-0.198497	-0.0542489	0.0407	0.5694	0.6939	0.8056	0.694267	0.612727	1	0.72087	0.703106	0.617104	0.000177	0.001213	4.1
[R].RRSPPPR.[R]	1xTMT6plex [N-Term]; 1xPhospho [S3(100)]	0.0991361	0.00736857	1	2	1	12	P84104-1	P84104-1 [106-112]	P84104-1 1xPhospho [S108(100)]	2	1174.64	P84104-1	Serine/arginine-rich splicing factor 3 [OS=Mus musculus]	Srsf3	0.706247	-0.0101977	-0.277285	-0.108756	0.0408	0.8337	0.4381	0.9801	0.754228	0.612913	1	0.813282	0.742796	0.737564	0.003113	0.04751	1.82
[K].DSKSEETLDEGPPK.[Y]	2xTMT6plex [K3; K14]; 1xTMT6plex [N-Term]; 1xPhospho [S/T]	0.000512894	7.97536e-05	1	1	1	1	Q62446	Q62446 [97-110]		1	2299.17	Q62446	peptidyl-prolyl cis-trans isomerase FKBP3 [OS=Mus musculus]	Fkbp3	0.706091	0.549006	0.165001	0.0500819	0.0409	0.0113	0.1251	0.4486	0.547468	0.612979	1	0.52879	0.546733	0.799912	1.072e-05	7.946e-05	3.25
[R].QGAQESGLPRSPSRR.[G]	1xTMT6plex [N-Term]; 1xPhospho [S11(98.5)]	0.00103875	7.97536e-05	1	1	1	1	Q00731-6	Q00731-6 [150-164]	Q00731-6 1xPhospho [S160(98.5)]	2	1934.98	Q00731-6	Isoform L-VEGF-1 of Vascular endothelial growth factor A [OS=Mus musculus]	Vegfa	0.705644	-0.0139861	-0.0210935	0.0434484	0.041	0.8503	0.5825	0.4685	0.671172	0.613169	1	0.65126	0.6222	0.616197	1.072e-05	0.0001965	2.82
[R].TPGTPGTPSYPR.[T]	1xTMT6plex [N-Term]; 2xPhospho [T4(100); T7(98.6)]	0.00508195	0.000816232	2	5	1	3	P20357; P15146	P20357 [1617-1628]; P15146 [1619-1630]	P20357 2xPhospho [T1620(100); T1623(98.6)]; P15146 2xPhospho [T1622(100); T1625(98.6)]	0	1619.71	P20357	microtubule-associated protein 2 [OS=Mus musculus]	Map2; Mtap2	-0.741869	-0.360072	0.195438	-0.127046	0.041	0.2333	0.0925	0.906	0.87709	1	0.597964	0.957831	0.873308	0.680416	0.0001745	0.001501	4.06
[K].SRSIVGGLLQSK.[F]	1xTMT6plex [K12]; 1xTMT6plex [N-Term]; 1xPhospho [S3(99.4)]	0.00278161	0.000587017	1	2	1	1	P49793	P49793 [1040-1051]	P49793 1xPhospho [S1042(99.4)]	1	1783.02	P49793	nuclear pore complex protein Nup98-Nup96 [OS=Rattus norvegicus]	Nup98	-0.740786	-0.229625	0.507006	0.177653	0.0411	0.4655	0.0048	0.1636	0.876732	1	0.598413	0.775154	0.703681	0.600139	0.0001035	0.0007168	2.3
[K].QPPISPTSK.[T]	1xTMT6plex [K9]; 1xTMT6plex [N-Term]; 1xPhospho [S5(100)]	0.0330419	0.00257124	1	4	1	6	Q8C8R3-1	Q8C8R3-1 [1932-1940]	Q8C8R3-1 1xPhospho [S1936(100)]	0	1492.82	Q8C8R3-1	Ankyrin-2 [OS=Mus musculus]	Ank2	0.704523	-0.105342	-0.538577	-0.391289	0.0412	0.8212	0.0877	0.2353	0.710387	0.613645	1	0.931719	0.891344	0.828579	0.00106	0.01002	2.28
[R].LSPAKSPSLSPSPPSPIEK.[T]	2xTMT6plex [K5; K19]; 1xTMT6plex [N-Term]; 2xPhospho [S6(100); S]	4.43661e-07	7.97536e-05	2	2	3	5	P14873; P15205	P14873 [1246-1264]; P15205 [1242-1260]	P14873 2xPhospho [S1251(100); S]; P15205 2xPhospho [S1247(100); S]	1	2766.47	P14873	microtubule-associated protein 1B [OS=Mus musculus]	Map1b; Mtap1b	0.703955	-0.120065	-0.261702	0.155521	0.0413	0.7719	0.4842	0.1987	0.761487	0.613887	1	0.683669	0.735984	0.677213	1.072e-05	1.361e-08	5.8
[K].AADPPAENSSAPEAEQGGAE.[-]	1xTMT6plex [N-Term]; 1xPhospho [S]	5.41287e-06	7.97536e-05	1	1	2	31	P62960	P62960 [303-322]		0	2206.93	P62960	Nuclease-sensitive element-binding protein 1 [OS=Mus musculus]	Ybx1	0.703761	-0.0931889	-0.293295	0.0499448	0.0414	0.8636	0.3969	0.4491	0.712845	0.613969	1	0.688589	0.75238	0.705317	1.072e-05	2.919e-07	3.97
[R].ALYLEPSDGVSPTQETGEAQSQDDER.[S]	1xTMT6plex [N-Term]; 1xPhospho [S/T/Y]	0.0587837	0.00451759	1	2	1	1	Q6ZPE2	Q6ZPE2 [696-721]		0	3131.39	Q6ZPE2	Myotubularin-related protein 5 [OS=Mus musculus]	Sbf1	0.703724	-0.0944266	0.200989	0.0608392	0.0415	0.8596	0.0871	0.4171	0.546035	0.613985	1	0.523487	0.534139	0.500298	0.001617	0.01702	1.5
[K].RKSGEVEEDLVK.[C]	2xTMT6plex [K2; K12]; 1xTMT6plex [N-Term]; 1xPhospho [S3(100)]	0.00438448	0.000769263	1	4	1	2	Q80WE4	Q80WE4 [1610-1621]	Q80WE4 1xPhospho [S1612(100)]	2	2156.19	Q80WE4	Kinesin-like protein KIF20B [OS=Mus musculus]	Kif20b	0.703569	0.402806	-0.0799844	0.111232	0.0416	0.0375	0.818	0.287	0.669176	0.614051	1	0.619521	0.649056	0.858102	0.000151	0.001257	3.23
[R].NTETVPSQNNSGSSSPVFNFR.[H]	1xTMT6plex [N-Term]; 2xPhospho [S14(97.8); S15(99.9)]	2.79981e-05	7.97536e-05	1	2	3	4	Q80VC9	Q80VC9 [337-357]	Q80VC9 2xPhospho [S350(97.8); S351(99.9)]	0	2658.14	Q80VC9	Calmodulin-regulated spectrin-associated protein 3 [OS=Mus musculus]	Camsap3	0.702711	-0.0695409	-0.207895	-0.20494	0.0417	0.9483	0.6623	0.6452	0.700416	0.614417	1	0.807327	0.709652	0.676257	1.072e-05	2.183e-06	4.96
[R].GSETGSETHESDLAPSDK.[E]	1xTMT6plex [K18]; 1xTMT6plex [N-Term]; 1xPhospho [S6(99.1)]	2.77715e-07	7.97536e-05	1	2	3	11	Q6MG48	Q6MG48 [1108-1125]	Q6MG48 1xPhospho [S1113(99.1)]	0	2385.09	Q6MG48	Protein PRRC2A [OS=Rattus norvegicus]	Prrc2a	0.700755	-0.255062	-0.204578	0.00018008	0.0418	0.4069	0.6738	0.6124	0.727582	0.61525	1	0.727492	0.708983	0.594093	1.072e-05	7.647e-09	3.62
[K].LSSWDQAETPGHTPSLRWDETPGR.[A]	1xTMT6plex [N-Term]; 3xPhospho [T9(100); T13(100); T21(98)]	0.000222776	7.97536e-05	1	1	1	1	Q99NB9	Q99NB9 [215-238]	Q99NB9 3xPhospho [T223(100); T227(100); T235(98)]	1	3192.34	Q99NB9	splicing factor 3B subunit 1 [OS=Mus musculus]	Sf3b1	0.700724	-0.121028	-0.289297	-0.0970634	0.0419	0.7687	0.4073	0.9721	0.684294	0.615263	1	0.731917	0.751879	0.691377	1.072e-05	2.807e-05	3.37
[R].NHSGSRTPPVALSSSR.[M]	1xTMT6plex [N-Term]; 2xPhospho [S3(98.2); T7(100)]	0.0107272	0.00101201	1	3	2	3	Q8BTI8	Q8BTI8 [2050-2065]	Q8BTI8 2xPhospho [S2052(98.2); T2056(100)]	1	2041.94	Q8BTI8	serine/arginine repetitive matrix protein 2 [OS=Mus musculus]	Srrm2	0.69876	-0.572169	-0.211717	-0.0898309	0.042	0.0762	0.6481	0.9432	0.69369	0.616101	1	0.738256	0.713486	0.479894	0.0003756	0.003588	3.67
[R].HSEETEEERSYEGAK.[G]	1xTMT6plex [K15]; 1xTMT6plex [N-Term]; 1xPhospho [S10(100)]	0.000622227	0.000120904	1	1	1	1	O35314	O35314 [396-410]	O35314 1xPhospho [S405(100)]	1	2319.05	O35314	Secretogranin-1 [OS=Rattus norvegicus]	Chgb	0.698471	-0.568467	-0.656889	-0.364145	0.0421	0.0777	0.0471	0.2745	0.766181	0.616225	1	0.986166	0.971589	0.655174	9.234e-05	0.0002945	2.7
[K].HVLPTSAPDVTSSLPEGK.[N]	1xTMT6plex [K18]; 1xTMT6plex [N-Term]; 1xPhospho [S6(98.6)]	0.000501407	7.97536e-05	1	2	1	1	Q9ERE6	Q9ERE6 [485-502]	Q9ERE6 1xPhospho [S490(98.6)]	0	2373.25	Q9ERE6	Myosin phosphatase Rho-interacting protein [OS=Rattus norvegicus]	Mprip	0.69762	0.211344	-0.157933	-0.237385	0.0422	0.2089	0.8525	0.5512	0.653564	0.616589	1	0.770456	0.68792	0.796451	1.072e-05	7.741e-05	3.29
[K].EEVASETPAAVPDITPPAPDRPIEK.[K]	1xTMT6plex [K25]; 1xTMT6plex [N-Term]; 1xPhospho [T15(100)]	1.96798e-06	7.97536e-05	1	2	1	4	Q8K3X0	Q8K3X0 [374-398]	Q8K3X0 1xPhospho [T388(100)]	0	3167.63	Q8K3X0	Protein CASC3 [OS=Rattus norvegicus]	Casc3	0.697452	-0.136484	-0.672061	-0.526243	0.0423	0.7184	0.0423	0.1088	0.68325	0.61666	1	0.983998	0.982554	0.893862	1.072e-05	8.432e-08	4.79
[R].VTSSQQQTR.[I]	1xTMT6plex [N-Term]; 1xPhospho [S3(99.1)]	0.00966819	0.00109238	2	3	3	4	Q66H76; Q8VI36	Q66H76 [277-285]; Q8VI36 [248-256]	Q66H76 1xPhospho [S279(99.1)]; Q8VI36 1xPhospho [S250(99.1)]	0	1343.65	Q66H76	Paxillin [OS=Rattus norvegicus]	Pxn	-0.717345	-0.158182	0.153267	0.109161	0.0424	0.6542	0.1409	0.2914	0.918383	1	0.608216	0.851458	0.899212	0.805832	0.000362	0.003047	1.94
[R].DVTNLTVGGFTPMSPR.[I]	1xTMT6plex [N-Term]; 1xPhospho [S14(99.1)]	0.00131305	0.000160309	1	2	1	1	O55201	O55201 [651-666]	O55201 1xPhospho [S664(99.1)]	0	2000.97	O55201	Transcription elongation factor Spt5 [OS=Mus musculus]	Supt5; Supt5h	-0.717068	0.232927	0.246013	0.077656	0.0425	0.174	0.058	0.3685	0.88406	1	0.608332	0.837732	0.843224	0.990971	0.0001221	0.0005164	4.55
[K].TAFDEAIAELDTLSEESYK.[D]	1xTMT6plex [K19]; 1xTMT6plex [N-Term]; 1xPhospho [S14(100)]	4.49836e-05	5.91125e-05	1	1	2	7	P63101	P63101 [194-212]	P63101 1xPhospho [S207(100)]	0	2670.28	P63101	14-3-3 protein zeta/delta [OS=Mus musculus]	Ywhaz	-0.71629	0.0731207	0.0888056	0.00279962	0.0426	0.5458	0.2499	0.6024	0.897446	1	0.608661	0.895706	0.940301	0.989187	4.518e-05	4.305e-05	4.48
[R].FPLMYEENSRENPFK.[R]	1xTMT6plex [K15]; 1xTMT6plex [N-Term]; 1xPhospho [S9(100)]	0.00123695	0.000160309	1	2	1	1	P10362	P10362 [168-182]	P10362 1xPhospho [S176(100)]	1	2439.18	P10362	Secretogranin-2 [OS=Rattus norvegicus]	Scg2	0.695817	0.184995	-0.725313	-0.488285	0.0427	0.2544	0.0323	0.1352	0.619365	0.532072	0.86185	0.868831	0.879652	1	0.0001221	0.0004941	4.13
[K].TGADTTAAGPLFQQRPYPSPGAVLR.[A]	1xTMT6plex [N-Term]; 1xPhospho [S19(100)]	2.47045e-09	7.97536e-05	1	2	2	15	Q6PCT5	Q6PCT5 [227-251]	Q6PCT5 1xPhospho [S245(100)]	0	2880.46	Q6PCT5	Polyglutamine-binding protein 1 [OS=Rattus norvegicus]	Pqbp1	0.695809	0.224946	0.0889232	-0.155724	0.0428	0.185	0.2496	0.8043	0.569075	0.617363	1	0.633939	0.58046	0.678403	1.072e-05	2.349e-11	6.17
[R].SRSGEGEVSGLMR.[K]	1xTMT6plex [N-Term]; 1xPhospho [S3(100)]	0.115768	0.00885685	1	1	1	1	O08629	O08629 [472-484]	O08629 1xPhospho [S474(100)]	1	1673.79	O08629	Transcription intermediary factor 1-beta [OS=Rattus norvegicus]	Trim28	-0.713902	0.176388	0.290633	0.333103	0.0429	0.2711	0.0367	0.0388	1	0.894829	0.54555	0.793827	0.731562	0.826703	0.003706	0.05726	3
[K].VGHWSRSPLRPPR.[E]	1xTMT6plex [N-Term]; 1xPhospho [S]	0.0181196	0.00150532	1	1	2	2	P24788-1	P24788-1 [228-240]		1	1853.98	P24788-1	Cyclin-dependent kinase 11B [OS=Mus musculus]	Cdk11b	0.695043	0.0998679	-0.368743	0.045736	0.043	0.4669	0.2519	0.4607	0.76474	0.617691	1	0.740877	0.797579	0.854746	0.0005874	0.005703	2.72
[R].NPALQTSLSSLSSSMSR.[A]	1xTMT6plex [N-Term]; 2xPhospho [S9(97.6); S10(99.9)]	0.012099	0.00125084	1	1	1	1	Q5Y5T5	Q5Y5T5 [618-634]	Q5Y5T5 2xPhospho [S626(97.6); S627(99.9)]	0	2154.97	Q5Y5T5	Probable palmitoyltransferase ZDHHC8 [OS=Mus musculus]	Zdhhc8	0.694727	-0.0908918	-0.126386	-0.0799748	0.0431	0.8717	0.9854	0.9022	0.761595	0.617826	1	0.805006	0.674392	0.633215	0.0004391	0.003825	1.67
[K].GPLEAPQDGEAEEGTTSDGEKK.[R]	2xTMT6plex [K21; K22]; 1xTMT6plex [N-Term]; 1xPhospho [S17(97.5)]	0.000376338	7.97536e-05	1	3	1	1	Q5QD51-1	Q5QD51-1 [569-590]	Q5QD51-1 1xPhospho [S585(97.5)]	1	3012.47	Q5QD51-1	A-kinase anchor protein 12 [OS=Rattus norvegicus]	Akap12	0.694592	0.0065247	-0.840155	-0.720296	0.0432	0.7737	0.0196	0.0408	0.606973	0.500486	0.809999	1	0.895991	0.900052	1.072e-05	5.39e-05	3.97
[K].SCAEEPEVEPEAHEGDGDKK.[G]	1xCarbamidomethyl [C2]; 2xTMT6plex [K19; K20]; 1xTMT6plex [N-Term]; 1xPhospho [S1(100)]	7.20289e-06	7.97536e-05	1	1	1	2	Q8VHK7	Q8VHK7 [107-126]	Q8VHK7 1xPhospho [S107(100)]	1	2980.39	Q8VHK7	hepatoma-derived growth factor [OS=Rattus norvegicus]	Hdgf	0.693674	0.0190076	-0.536377	-0.705331	0.0433	0.7269	0.0893	0.0435	0.613302	0.596317	0.964481	1	0.864853	0.876323	1.072e-05	4.134e-07	5.13
[K].HRSESESK.[K]	1xTMT6plex [K8]; 1xTMT6plex [N-Term]; 2xPhospho [S3(100); S5(100)]	0.0119682	0.00125084	1	3	1	11	Q8BTI8	Q8BTI8 [218-225]	Q8BTI8 2xPhospho [S220(100); S222(100)]	1	1577.71	Q8BTI8	serine/arginine repetitive matrix protein 2 [OS=Mus musculus]	Srrm2	-0.708294	-0.534972	0.186489	0.180352	0.0433	0.0931	0.1006	0.1596	0.922044	1	0.612043	0.813692	0.878742	0.606483	0.0004391	0.003799	3.08
[R].RHSIEK.[E]	1xTMT6plex [K6]; 1xTMT6plex [N-Term]; 1xPhospho [S3(100)]	0.0365213	0.00271684	1	3	1	5	Q52KF3-1	Q52KF3-1 [363-368]	Q52KF3-1 1xPhospho [S365(100)]	1	1307.72	Q52KF3-1	Protein spire homolog 1 [OS=Mus musculus]	Spire1	0.69207	-0.0323258	-0.0985003	0.0115566	0.0434	0.9181	0.8953	0.5731	0.750368	0.618965	1	0.744381	0.662701	0.648017	0.001134	0.011	2.78
[R].GRGSPHLLGAGDNSTSDRK.[S]	1xTMT6plex [K19]; 1xTMT6plex [N-Term]; 1xPhospho [S4(100)]	0.0002466	7.97536e-05	1	1	1	2	Q8VC31	Q8VC31 [132-150]	Q8VC31 1xPhospho [S135(100)]	2	2463.25	Q8VC31	coiled-coil domain-containing protein 9 [OS=Mus musculus]	Ccdc9	0.692044	0.314568	-0.255069	-0.108756	0.0435	0.0848	0.5051	0.9801	0.720048	0.618976	1	0.776427	0.738682	0.918654	1.072e-05	3.181e-05	3.57
[R].RSISSDSSSSK.[K]	1xTMT6plex [K11]; 1xTMT6plex [N-Term]; 3xPhospho [S2(98.6); S7(100); S8(98.6)]	0.0301106	0.00252435	1	1	1	1	Q8BWS5	Q8BWS5 [720-730]	Q8BWS5 3xPhospho [S721(98.6); S726(100); S727(98.6)]	1	1838.77	Q8BWS5	G protein-regulated inducer of neurite outgrowth 3 [OS=Mus musculus]	Gprin3	0.691904	0.315865	-0.0432109	0.0245107	0.0436	0.0833	0.668	0.5299	0.707449	0.619037	1	0.695531	0.637858	0.793979	0.001026	0.009215	2.62
[R].GRLSPVPVPR.[A]	1xTMT6plex [N-Term]; 1xPhospho [S4(100)]	0.00115678	7.97536e-05	1	2	1	14	Q64012	Q64012 [132-141]	Q64012 1xPhospho [S135(100)]	1	1386.78	Q64012	RNA-binding protein Raly [OS=Mus musculus]	Raly	0.691788	-0.0178135	-0.172665	0.147927	0.0437	0.8626	0.7936	0.213	0.75109	0.619086	1	0.677894	0.697796	0.689233	1.072e-05	0.0002265	3.73
[K].NPEPDSDEHTPVEDEEPK.[K]	1xTMT6plex [K18]; 1xTMT6plex [N-Term]; 1xPhospho [S6(100)]	2.42177e-05	7.97536e-05	1	2	1	6	Q9D0F4	Q9D0F4 [150-167]	Q9D0F4 1xPhospho [S155(100)]	0	2602.16	Q9D0F4	NF-kappa-B-activating protein [OS=Mus musculus]	Nkap	-0.702487	-0.667147	-0.024668	-0.257268	0.0438	0.0489	0.5946	0.4982	0.836671	0.976414	0.600018	1	0.993252	0.625501	1.072e-05	1.831e-06	3.66
[K].SPPPPEEEAKDEEEDQTLVNLDTYTSDLHFQISK.[D]	2xTMT6plex [K10; K34]; 1xTMT6plex [N-Term]; 1xPhospho [S1(100)]	2.30871e-14	7.97536e-05	1	1	1	70	Q00PI9	Q00PI9 [226-259]	Q00PI9 1xPhospho [S226(100)]	1	4669.27	Q00PI9	heterogeneous nuclear ribonucleoprotein U-like protein 2 [OS=Mus musculus]	Hnrnpul2	-0.702333	-0.199488	-0.161248	-0.0541264	0.0439	0.5368	0.8376	0.8051	0.815952	0.894251	0.549587	0.847146	1	0.87086	1.072e-05	1.621e-17	10.65
[R].DFQEDSWGETK.[H]	1xTMT6plex [K11]; 1xTMT6plex [N-Term]; 1xPhospho [S6(100)]	0.000680918	7.97536e-05	1	1	1	3	P34926	P34926 [1017-1027]	P34926 1xPhospho [S1022(100)]	0	1879.85	P34926	Microtubule-associated protein 1A [OS=Rattus norvegicus]	Map1a	-0.699427	-0.278633	-0.347733	-0.324847	0.044	0.36	0.2855	0.3432	0.688177	0.785818	0.48392	0.861963	1	0.824372	1.072e-05	0.0001136	2.88
[R].QREESYSR.[M]	1xTMT6plex [N-Term]; 1xPhospho [S5(100)]	0.0106897	0.00120429	1	1	1	1	Q8VIJ6	Q8VIJ6 [584-591]	Q8VIJ6 1xPhospho [S588(100)]	1	1363.62	Q8VIJ6	splicing factor, proline- and glutamine-rich [OS=Mus musculus]	Sfpq	-0.698933	-0.0680275	-0.152251	-0.497385	0.0441	0.9537	0.875	0.1282	0.70839	0.770737	0.474795	1	0.856521	0.817071	0.0004042	0.003371	2.28
[K].VRPSSDLSNSTGQSPHHK.[G]	1xTMT6plex [K18]; 1xTMT6plex [N-Term]; 2xPhospho [S10(98); S14(100)]	3.28252e-05	7.97536e-05	1	1	3	8	Q8VHF0	Q8VHF0 [387-404]	Q8VHF0 2xPhospho [S396(98); S400(100)]	0	2552.21	Q8VHF0	MAP/microtubule affinity-regulating kinase 3 [OS=Rattus norvegicus]	Mark3	-0.696657	-0.348015	0.0957619	0.137011	0.0442	0.2476	0.2366	0.2331	0.952831	1	0.617	0.866506	0.935778	0.735207	1.072e-05	2.658e-06	5.11
[K].SESQVTMLQGQGFSLR.[T]	1xOxidation [M7]; 1xTMT6plex [N-Term]; 2xPhospho [S3(100); T6(100)]	0.00190581	0.00046153	1	4	1	1	B5D5N9	B5D5N9 [461-476]	B5D5N9 2xPhospho [S463(100); T466(100)]	0	2172.96	B5D5N9	cationic amino acid transporter 2 [OS=Rattus norvegicus]	Slc7a2	-0.695538	-0.208541	0.0385101	-0.381999	0.0443	0.5133	0.3742	0.2487	0.767374	0.91345	0.564036	1	0.889389	0.769688	6.971e-05	0.0004375	2.8
[K].AAEFPDFYDSEEQMGPHQEAEDEK.[D]	1xOxidation [M14]; 1xTMT6plex [K24]; 1xTMT6plex [N-Term]; 1xPhospho [S10(100)]	4.89387e-05	5.91125e-05	1	1	2	7	O35314	O35314 [615-638]	O35314 1xPhospho [S624(100)]	0	3353.42	O35314	Secretogranin-1 [OS=Rattus norvegicus]	Chgb	0.688495	-0.441238	-0.181854	-0.302031	0.0444	0.1511	0.7599	0.3909	0.655753	0.620501	1	0.808465	0.703859	0.518394	4.518e-05	4.639e-05	4.27
[R].RSPSPYYSR.[YG]	1xTMT6plex [N-Term]; 2xPhospho [S2(100); S4(100)]	0.00137742	0.000161714	2	2	3	7	Q6PFR5; P62996-1	Q6PFR5 [258-266]; P62996-1 [263-271]	Q6PFR5 2xPhospho [S259(100); S261(100)]; P62996-1 2xPhospho [S264(100); S266(100)]	1	1501.64	Q6PFR5	Transformer-2 protein homolog alpha [OS=Mus musculus]	Tra2a	-0.694999	-0.386342	0.264983	0.00365464	0.0445	0.2041	0.0483	0.5989	0.858757	1	0.61771	0.856584	0.832208	0.636695	2.12e-05	0.000284	3.91
[R].SASVLGPK.[A]	1xTMT6plex [K8]; 1xTMT6plex [N-Term]; 1xPhospho [S]	0.00782872	0.00104516	2	3	2	2	P54282-1; P97445	P54282-1 [2076-2083]; P97445 [2076-2083]		0	1296.73	P54282-1	Voltage-dependent P/Q-type calcium channel subunit alpha-1A [OS=Rattus norvegicus]	Cacna1a	-0.69473	0.060648	0.0337311	-0.394272	0.0446	0.5893	0.3869	0.2309	0.760873	0.889116	0.549318	1	0.868569	0.90586	0.0003127	0.002434	2.39
[K].RAVSREDSARPGAHAK.[V]	1xTMT6plex [K16]; 1xTMT6plex [N-Term]; 1xPhospho [S4(100)]	0.00161034	0.00046153	1	1	1	5	Q9CX86	Q9CX86 [81-96]	Q9CX86 1xPhospho [S84(100)]	2	2246.19	Q9CX86	Heterogeneous nuclear ribonucleoprotein A0 [OS=Mus musculus]	Hnrnpa0	0.687577	0.195414	-0.272654	0.0441292	0.0447	0.2355	0.4512	0.4655	0.754584	0.620896	1	0.731852	0.750059	0.858858	6.971e-05	0.0003511	3.74
[R].DQRPSSPIRHQGR.[S]	1xTMT6plex [N-Term]; 1xPhospho [S5(99.1)]	0.0017226	0.00046153	1	1	2	2	E9Q784	E9Q784 [699-711]	E9Q784 1xPhospho [S703(99.1)]	1	1842.93	E9Q784	Zinc finger CCCH domain-containing protein 13 [OS=Mus musculus]	Zc3h13	0.686094	-0.022667	0.0549286	0.362431	0.0448	0.8821	0.3288	0.0298	0.755184	0.621534	1	0.587422	0.598315	0.588988	6.971e-05	0.000384	3.17
[K].VEESSEISPEPK.[T]	1xTMT6plex [K12]; 1xTMT6plex [N-Term]; 1xPhospho [S8(100)]	9.61048e-05	7.97536e-05	1	2	1	6	Q569C3	Q569C3 [468-479]	Q569C3 1xPhospho [S475(100)]	0	1868.93	Q569C3	Ubiquitin carboxyl-terminal hydrolase 1 [OS=Rattus norvegicus]	Usp1	0.685035	0.148531	-0.0117881	0.0887257	0.0449	0.335	0.5458	0.3408	0.727299	0.621991	1	0.683918	0.627094	0.695096	1.072e-05	9.917e-06	3.09
[R].LRQDHADSCVVSSDDEELSK.[D]	1xCarbamidomethyl [C9]; 1xTMT6plex [K20]; 1xTMT6plex [N-Term]; 2xPhospho [S12(100); S13(100)]	6.15903e-09	7.97536e-05	1	1	1	1	O88846	O88846 [87-106]	O88846 2xPhospho [S98(100); S99(100)]	1	2908.28	O88846	E3 ubiquitin-protein ligase RNF4 [OS=Rattus norvegicus]	Rnf4	0.684396	0.277794	0.0133236	-0.0671717	0.045	0.1187	0.4515	0.8542	0.534669	0.622266	1	0.560152	0.616546	0.747463	1.072e-05	7.205e-11	5.91
[RK].SRSVDK.[DS]	1xTMT6plex [K6]; 1xTMT6plex [N-Term]; 1xPhospho [S3(100)]	0.0398989	0.00292753	2	4	1	5	A2AJT4; Q52KF3-1	A2AJT4 [670-675]; Q52KF3-1 [518-523]	A2AJT4 1xPhospho [S672(100)]; Q52KF3-1 1xPhospho [S520(100)]	1	1229.67	A2AJT4	Arginine/serine-rich protein PNISR [OS=Mus musculus]	Sfrs18; Pnisr	-0.682629	0.064309	-0.256622	-0.0853816	0.0451	0.5774	0.4986	0.9239	0.830944	0.800553	0.498768	0.881605	0.956403	1	0.001197	0.01191	2.07
[R].IAQLEEELEEEQGNMEAMSDR.[V]	1xTMT6plex [N-Term]; 1xPhospho [S19(100)]	0.0322344	0.00298051	1	5	1	1	Q63862-1	Q63862-1 [1093-1113]	Q63862-1 1xPhospho [S1111(100)]	0	2760.19	Q63862-1	Myosin-11 [OS=Rattus norvegicus]	Myh11	0.683153	-0.206113	0.140811	-0.110273	0.0452	0.5196	0.1594	0.9742	0.557097	0.622803	1	0.601348	0.564888	0.489684	0.001134	0.01353	1.73
[R].LVSAAASPSLIR.[E]	1xTMT6plex [N-Term]; 1xPhospho [S7(100)]	3.65534e-05	7.97536e-05	1	1	1	8	Q61033-1	Q61033-1 [302-313]	Q61033-1 1xPhospho [S308(100)]	0	1493.83	Q61033-1	Lamina-associated polypeptide 2, isoforms alpha/zeta [OS=Mus musculus]	Tmpo	0.683127	-0.0671461	-0.000428847	0.519779	0.0453	0.9576	0.5014	0.0067	0.766865	0.622814	1	0.534872	0.622999	0.594668	1.072e-05	3.023e-06	3.66
[R].IYISNTFSPSK.[A]	1xTMT6plex [K11]; 1xTMT6plex [N-Term]; 1xPhospho [S8(100)]	0.000211728	7.97536e-05	1	3	2	7	O54772	O54772 [196-206]	O54772 1xPhospho [S203(100)]	0	1794.94	O54772	SWI/SNF-related matrix-associated actin-dependent regulator of chromatin subfamily D member 2 [OS=Rattus norvegicus]	Smarcd2	-0.67954	-0.474128	-0.187309	-0.152288	0.0454	0.1273	0.7366	0.8176	0.851717	0.878243	0.548344	0.946539	1	0.719902	1.072e-05	2.639e-05	3.1
[K].AAQPPTETAESSQAEEEK.[ED]	1xTMT6plex [K18]; 1xTMT6plex [N-Term]; 2xPhospho [S11(100); S12(100)]	1.43371e-05	7.97536e-05	1	2	1	1	P07936	P07936 [181-198]	P07936 2xPhospho [S191(100); S192(100)]	0	2521.11	P07936	Neuromodulin [OS=Rattus norvegicus]	Gap43	0.682002	-0.505099	-0.267491	-0.416259	0.0455	0.11	0.4669	0.2033	0.646672	0.6233	1	0.862959	0.750274	0.528652	1.072e-05	9.626e-07	3.76
[K].LTSSCPDLPSQSDKK.[CR]	1xCarbamidomethyl [C5]; 2xTMT6plex [K14; K15]; 1xTMT6plex [N-Term]; 1xPhospho [S/T]	0.0945974	0.00676717	1	2	1	1	Q9Z158	Q9Z158 [285-299]		1	2430.26	Q9Z158	Syntaxin-17 [OS=Rattus norvegicus]	Stx17	0.682002	-0.0927028	-0.27316	-0.108936	0.0456	0.8654	0.449	0.979	0.698406	0.6233	1	0.753184	0.753228	0.70635	0.002197	0.02645	1.48
[K].SLTPTLPMESTLNK.[L]	1xTMT6plex [K14]; 1xTMT6plex [N-Term]; 1xPhospho [T3(100)]	8.55324e-05	7.97536e-05	1	3	3	14	P27321	P27321 [171-184]	P27321 1xPhospho [T173(100)]	0	2070.1	P27321	Calpastatin [OS=Rattus norvegicus]	Cast	0.681741	0.281288	-0.209097	-0.225945	0.0457	0.1148	0.6586	0.5823	0.662942	0.623413	1	0.775339	0.720642	0.875782	1.072e-05	8.6e-06	3.72
[R].SSGGGSSGGER.[R]	1xTMT6plex [N-Term]; 1xPhospho [S6(98.7)]	0.000935867	7.97536e-05	1	2	2	2	Q5XIW8	Q5XIW8 [42-52]	Q5XIW8 1xPhospho [S47(98.7)]	0	1246.53	Q5XIW8	U4/U6.U5 tri-snRNP-associated protein 1 [OS=Rattus norvegicus]	Sart1	-0.677524	-0.676329	-0.0138367	0.133628	0.0457	0.0464	0.5539	0.2395	1	0.963453	0.602387	0.911536	0.972737	0.608696	1.072e-05	0.0001713	2.13
[R].VVDLLRYMFSR.[E]	1xOxidation [M8]; 1xTMT6plex [N-Term]; 1xPhospho [S10(98.1)]	0.0428855	0.00358556	1	2	2	2	Q64467	Q64467 [428-438]	Q64467 1xPhospho [S437(98.1)]	1	1723.88	Q64467	Glyceraldehyde-3-phosphate dehydrogenase, testis-specific [OS=Mus musculus]	Gapdhs	-0.676386	0.169568	0.0121137	0.238327	0.0458	0.2869	0.4558	0.0931	1	0.842801	0.527367	0.847728	0.835754	0.939991	0.001462	0.01861	2.08
[K].QESDEESRPQNTNYPR.[S]	1xTMT6plex [N-Term]; 1xPhospho [S3(100)]	1.54522e-05	7.97536e-05	1	2	1	4	Q64127	Q64127 [743-758]	Q64127 1xPhospho [S745(100)]	0	2258.99	Q64127	Transcription intermediary factor 1-alpha [OS=Mus musculus]	Trim24	0.681005	0.485571	-0.0562356	0.0193158	0.0459	0.0178	0.718	0.5471	0.610661	0.62373	1	0.60254	0.648523	0.908023	1.072e-05	1.051e-06	4.17
[R].RRDSYYDR.[G]	1xTMT6plex [N-Term]; 1xPhospho [S4(100)]	0.0109205	0.00120429	1	1	1	7	Q6PFR5	Q6PFR5 [234-241]	Q6PFR5 1xPhospho [S237(100)]	2	1439.66	Q6PFR5	Transformer-2 protein homolog alpha [OS=Mus musculus]	Tra2a	-0.672614	-0.640524	0.0010596	-0.44709	0.046	0.0549	0.4949	0.1701	0.733521	0.850148	0.533356	1	0.849524	0.544953	0.0004042	0.003454	2.73
[R].SSGSPYGGGYGSGGGSGGYGSR.[R]	1xTMT6plex [N-Term]; 1xPhospho [S4(100)]	6.4028e-05	5.91125e-05	1	2	2	10	Q6URK4	Q6URK4 [356-377]	Q6URK4 1xPhospho [S359(100)]	0	2219.92	Q6URK4	Heterogeneous nuclear ribonucleoprotein A3 [OS=Rattus norvegicus]	Hnrnpa3	0.679464	-0.110435	-0.059282	0.0781955	0.0461	0.8036	0.7319	0.3669	0.727832	0.624397	1	0.689433	0.650589	0.602646	5.611e-05	5.827e-05	4.35
[K].EGSLAEADHTAHEEMEANATGK.[E]	1xOxidation [M15]; 1xTMT6plex [K22]; 1xTMT6plex [N-Term]; 1xPhospho [S3(100)]	5.14237e-08	7.97536e-05	1	1	1	13	Q8CH25-2	Q8CH25-2 [197-218]	Q8CH25-2 1xPhospho [S199(100)]	0	2852.28	Q8CH25-2	Isoform 2 of SAFB-like transcription modulator [OS=Mus musculus]	Sltm	-0.669513	-0.156119	-0.366451	-0.339487	0.0462	0.6603	0.2553	0.315	0.710607	0.775688	0.48769	0.899136	1	0.897436	1.072e-05	9.71e-10	6.36
[K].KTGSPEIK.[L]	2xTMT6plex [K1; K8]; 1xTMT6plex [N-Term]; 1xPhospho [S4(100)]	0.00381233	0.000710363	1	3	1	8	Q6P2L6	Q6P2L6 [147-154]	Q6P2L6 1xPhospho [S150(100)]	1	1626.94	Q6P2L6	Histone-lysine N-methyltransferase NSD3 [OS=Mus musculus]	Whsc1l1; Nsd3	-0.669335	-0.463268	-0.00198732	0.030746	0.0463	0.1358	0.5086	0.5108	1	0.990249	0.622665	0.978914	0.991614	0.719258	0.000135	0.00106	2.96
[K].QLPTPVGAVQQDPALSSNREAHQHR.[D]	1xTMT6plex [N-Term]; 1xPhospho [S17(98.8)]	8.21217e-06	7.97536e-05	1	2	3	8	Q8C4X2	Q8C4X2 [330-354]	Q8C4X2 1xPhospho [S346(98.8)]	1	3045.52	Q8C4X2	Casein kinase I isoform gamma-3 [OS=Mus musculus]	Csnk1g3	0.678123	-0.227806	-0.183211	-0.298803	0.0464	0.4692	0.7538	0.3977	0.622598	0.624978	1	0.765873	0.709605	0.605955	1.072e-05	4.864e-07	4.41
[K].REAYSDVTSGSVDK.[N]	1xTMT6plex [K14]; 1xTMT6plex [N-Term]; 1xPhospho [S11(100)]	0.000935867	7.97536e-05	1	1	1	4	Q920R4	Q920R4 [335-348]	Q920R4 1xPhospho [S345(100)]	1	2052.01	Q920R4	G-protein coupled receptor-associated sorting protein 1 [OS=Rattus norvegicus]	Gprasp1	0.677715	-0.0919819	-0.188123	-0.164902	0.0465	0.8678	0.7338	0.7725	0.688411	0.625155	1	0.771771	0.712227	0.668235	1.072e-05	0.0001714	2.74
[K].ETLPVSSTPSK.[S]	1xTMT6plex [K11]; 1xTMT6plex [N-Term]; 1xPhospho [S7(97.7)]	0.00140688	0.000243324	1	4	1	1	P97691	P97691 [601-611]	P97691 1xPhospho [S607(97.7)]	0	1683.9	P97691	Forkhead box protein M1 [OS=Rattus norvegicus]	Foxm1	0.67767	-0.21435	-0.0764832	0.248867	0.0466	0.5007	0.8028	0.0838	0.660281	0.625174	1	0.555665	0.659211	0.568197	3.16e-05	0.0002929	2.61
[R].LVAEQVMGDEFDLDSDDELQIDER.[L]	1xOxidation [M7]; 1xTMT6plex [N-Term]; 1xPhospho [S15(100)]	9.79229e-07	7.97536e-05	1	2	1	1	Q80TJ7-1	Q80TJ7-1 [601-624]	Q80TJ7-1 1xPhospho [S615(100)]	0	3106.36	Q80TJ7-1	Histone lysine demethylase PHF8 [OS=Mus musculus]	Phf8; 4921501E09Rik	-0.666826	-0.419052	-0.0876495	-0.283927	0.0467	0.1708	0.8499	0.4307	0.802072	0.941055	0.592762	0.976526	1	0.747916	1.072e-05	3.583e-08	4.46
[K].DELTESPK.[Y]	1xTMT6plex [K8]; 1xTMT6plex [N-Term]; 1xPhospho [S6(99.6)]	0.00154387	0.000403121	1	2	3	18	Q6AXS5	Q6AXS5 [229-236]	Q6AXS5 1xPhospho [S234(99.6)]	0	1456.73	Q6AXS5	Plasminogen activator inhibitor 1 RNA-binding protein [OS=Rattus norvegicus]	Serbp1	0.67707	0.376677	-0.0747452	0.107454	0.0468	0.0469	0.7956	0.2946	0.682226	0.625434	1	0.633259	0.658692	0.855211	6.241e-05	0.0003316	3.34
[R].TASPPVLPK.[I]	1xTMT6plex [K9]; 1xTMT6plex [N-Term]; 1xPhospho [S3(100)]	0.00209115	0.00046153	1	1	1	11	Q63755	Q63755 [635-643]	Q63755 1xPhospho [S637(100)]	0	1447.83	Q63755	PR domain zinc finger protein 2 [OS=Rattus norvegicus]	Prdm2	-0.665249	-0.246845	-0.384117	-0.375914	0.0469	0.4255	0.2302	0.2558	0.714376	0.766248	0.48318	0.927019	1	0.842737	7.896e-05	0.0004956	2.85
[K].NAIPSDSEVDSDTEVPK.[D]	1xTMT6plex [K17]; 1xTMT6plex [N-Term]; 3xPhospho [S5(100); S7(100); S/T]	3.16195e-05	7.97536e-05	1	1	2	12	Q641X2	Q641X2 [302-318]	Q641X2 3xPhospho [S306(100); S308(100); S/T]	0	2501.05	Q641X2	RNA polymerase-associated protein LEO1 [OS=Rattus norvegicus]	Leo1	-0.665136	-0.61718	0.00604636	-0.2739	0.047	0.0608	0.4776	0.4543	0.827081	0.881564	0.55594	1	0.877878	0.572327	1.072e-05	2.54e-06	4.95
[K].GNKSPSPPPDGSPAATPEIR.[V]	1xTMT6plex [K3]; 1xTMT6plex [N-Term]; 3xPhospho [S4(100); S6(100); S12(100)]	0.071038	0.00558179	2	7	1	1	O08839; O08539-2	O08839 [293-312]; O08539-2 [262-281]	O08839 3xPhospho [S296(100); S298(100); S304(100)]; O08539-2 3xPhospho [S265(100); S267(100); S273(100)]	1	2673.21	O08839	Myc box-dependent-interacting protein 1 [OS=Rattus norvegicus]	Bin1	0.676654	0.0591402	0.0784379	0.186156	0.0471	0.5944	0.2717	0.1512	0.701525	0.625614	1	0.616602	0.592508	0.617302	0.002299	0.03239	5.57
[K].ASTTSLSGSDSETEGKQPCSDGFK.[D]	1xCarbamidomethyl [C19]; 2xTMT6plex [K16; K24]; 1xTMT6plex [N-Term]; 3xPhospho [S7(96.5); S9(99.9); S11(100)]	1.46766e-05	7.97536e-05	1	1	1	1	Q5U2Z5	Q5U2Z5 [44-67]	Q5U2Z5 3xPhospho [S50(96.5); S52(99.9); S54(100)]	1	3403.47	Q5U2Z5	Cap-specific mRNA (nucleoside-2'-O-)-methyltransferase 1 [OS=Rattus norvegicus]	Cmtr1; Ftsjd2	0.676146	-0.125328	-0.153852	-0.0443348	0.0472	0.7534	0.8695	0.7689	0.64319	0.625835	1	0.663262	0.696264	0.638332	1.072e-05	9.918e-07	3.47
[R].RPSLEK.[H]	1xTMT6plex [K6]; 1xTMT6plex [N-Term]; 1xPhospho [S3(100)]	0.0770355	0.00575521	2	3	1	8	P20357; P15146	P20357 [1424-1429]; P15146 [1425-1430]	P20357 1xPhospho [S1426(100)]; P15146 1xPhospho [S1427(100)]	0	1267.72	P20357	microtubule-associated protein 2 [OS=Mus musculus]	Map2; Mtap2	-0.662543	-0.617683	-0.0987352	-0.0651044	0.0473	0.0606	0.8962	0.8465	0.900721	0.933851	0.589973	0.942299	1	0.651717	0.001922	0.02181	2.24
[K].KGDVEGSQSQDEGEGSGESER.[G]	1xTMT6plex [K1]; 1xTMT6plex [N-Term]; 1xPhospho [S9(100)]	1.86707e-05	3.88506e-05	1	2	1	2	Q9CW03	Q9CW03 [1059-1079]	Q9CW03 1xPhospho [S1067(100)]	1	2705.19	Q9CW03	Structural maintenance of chromosomes protein 3 [OS=Mus musculus]	Smc3	-0.662354	0.00664515	0.0390118	-0.00389293	0.0474	0.7732	0.3725	0.6266	0.948602	1	0.631846	0.951165	0.973321	0.977815	1.413e-05	1.881e-05	5.81
[K].IWDPTPSHTPAGAATPGRGDTPGHATPGHGGATSSAR.[K]	1xTMT6plex [N-Term]; 1xPhospho [T21(97.8)]	0.000640947	0.000120904	1	1	2	2	Q99NB9	Q99NB9 [253-289]	Q99NB9 1xPhospho [T273(97.8)]	1	3855.81	Q99NB9	splicing factor 3B subunit 1 [OS=Mus musculus]	Sf3b1	0.675041	-0.578011	-0.273207	-0.0760638	0.0475	0.0736	0.4488	0.8886	0.749328	0.626314	1	0.789895	0.756896	0.507034	9.234e-05	0.0003008	5.57
[K].VLSEKPTPEGPEK.[T]	2xTMT6plex [K5; K13]; 1xTMT6plex [N-Term]; 1xPhospho [T7(100)]	0.00832087	0.00104516	1	1	1	1	O08815	O08815 [380-392]	O08815 1xPhospho [T386(100)]	0	2178.2	O08815	STE20-like serine/threonine-protein kinase [OS=Rattus norvegicus]	Slk	0.674128	-0.0421896	-0.466969	-0.172225	0.0476	0.9528	0.1388	0.7493	0.677252	0.626711	1	0.763125	0.866242	0.841277	0.0003191	0.002591	2.17
[K].LDRASPDLWPEQLPGVAEFAASFK.[S]	1xTMT6plex [K24]; 1xTMT6plex [N-Term]; 1xPhospho [S5(100)]	4.88288e-06	7.97536e-05	1	1	1	3	Q8CD94	Q8CD94 [24-47]	Q8CD94 1xPhospho [S28(100)]	1	3182.63	Q8CD94	protein lin-52 homolog [OS=Mus musculus]	Lin52; Gm7020	0.673081	0.176852	-0.0436004	-0.169719	0.0477	0.27	0.6697	0.7556	0.678913	0.627166	1	0.763668	0.646409	0.73071	1.072e-05	2.566e-07	5.37
[K].DVSDERLSPAKSPSLSPSPPSPIEK.[T]	2xTMT6plex [K11; K25]; 1xTMT6plex [N-Term]; 3xPhospho [S8(97.8); S12(95.7); S21(100)]	0.0186266	0.00190079	2	2	1	1	P14873; P15205	P14873 [1240-1264]; P15205 [1236-1260]	P14873 3xPhospho [S1247(97.8); S1251(95.7); S1260(100)]; P15205 3xPhospho [S1243(97.8); S1247(95.7); S1256(100)]	2	3547.73	P14873	microtubule-associated protein 1B [OS=Mus musculus]	Map1b; Mtap1b	0.672746	0.173417	-0.233884	-0.202463	0.0478	0.2788	0.5758	0.6534	0.700656	0.627312	1	0.806217	0.737716	0.831942	0.0006916	0.007014	3.7
[K].KSSSQDLHK.[G]	2xTMT6plex [K1; K9]; 1xTMT6plex [N-Term]; 1xPhospho [S2(98.3)]	0.124778	0.00911692	1	6	1	1	O88974-1	O88974-1 [174-182]	O88974-1 1xPhospho [S175(98.3)]	1	1796.99	O88974-1	Histone-lysine N-methyltransferase SETDB1 [OS=Mus musculus]	Setdb1	0.672489	-0.151534	-0.176329	-0.481625	0.0479	0.6743	0.7791	0.1395	0.584702	0.627423	1	0.816428	0.708991	0.6383	0.002801	0.03442	1.51
[K].RSREEEWDPEYTPK.[S]	1xTMT6plex [K14]; 1xTMT6plex [N-Term]; 1xPhospho [T12(100)]	0.000524633	7.97536e-05	1	2	1	4	Q5M7V8	Q5M7V8 [859-872]	Q5M7V8 1xPhospho [T870(100)]	2	2360.13	Q5M7V8	Thyroid hormone receptor-associated protein 3 [OS=Rattus norvegicus]	Thrap3	0.672423	0.298283	-0.215566	0.232393	0.048	0.1	0.635	0.099	0.72933	0.627452	1	0.620822	0.728572	0.89591	1.072e-05	8.159e-05	2.89
[K].VPASPLPGLDRK.[K]	1xTMT6plex [K12]; 1xTMT6plex [N-Term]; 1xPhospho [S4(100)]	0.00124924	7.97536e-05	2	5	1	5	O08679; Q05512	O08679 [450-461]; Q05512 [450-461]	O08679 1xPhospho [S453(100)]; Q05512 1xPhospho [S453(100)]	1	1788.02	O08679	Serine/threonine-protein kinase MARK2 [OS=Rattus norvegicus]	Mark2	0.672336	0.108762	-0.299547	0.0790475	0.048	0.4404	0.384	0.3645	0.744494	0.62749	1	0.7048	0.772288	0.83276	1.072e-05	0.0002507	3.18
[R].RAADEDWDSELEDDLLGEDLLSGK.[K]	1xTMT6plex [K24]; 1xTMT6plex [N-Term]; 1xPhospho [S9(100)]	5.97452e-05	5.91125e-05	1	2	1	2	Q9CXK9-1	Q9CXK9-1 [33-56]	Q9CXK9-1 1xPhospho [S41(100)]	1	3229.52	Q9CXK9-1	RNA-binding protein 33 [OS=Mus musculus]	Rbm33	-0.653811	-0.0809944	0.0282637	0.0767027	0.0481	0.9071	0.4032	0.3715	0.954129	1	0.635599	0.904726	0.9806	0.927065	5.611e-05	5.51e-05	4.63
[R].SGRLSQELDLVSHK.[V]	1xTMT6plex [K14]; 1xTMT6plex [N-Term]; 1xPhospho [S5(100)]	0.000688597	0.000120904	1	2	2	6	Q9JI85	Q9JI85 [85-98]	Q9JI85 1xPhospho [S89(100)]	1	2107.13	Q9JI85	Nucleobindin-2 [OS=Rattus norvegicus]	Nucb2	-0.653531	-0.0764621	0.362731	-0.149658	0.0482	0.9243	0.0172	0.8265	0.84671	1	0.635723	0.939261	0.777691	0.737547	9.234e-05	0.0003171	4.09
[R].TGTPPGYR.[G]	1xTMT6plex [N-Term]; 1xPhospho [T3(100)]	0.00737054	0.000992769	1	2	1	7	P54258	P54258 [660-667]	P54258 1xPhospho [T662(100)]	0	1157.56	P54258	Atrophin-1 [OS=Rattus norvegicus]	Atn1	0.671918	-0.139226	-0.214473	-0.180879	0.0483	0.7114	0.6379	0.7237	0.717015	0.627672	1	0.81279	0.728275	0.661278	0.0002823	0.002285	2.67
[K].RRTASPPPPPK.[R]	1xTMT6plex [K11]; 1xTMT6plex [N-Term]; 1xPhospho [T3(99)]	0.00409616	0.000710363	1	2	1	1	Q52KI8-1	Q52KI8-1 [631-641]	Q52KI8-1 1xPhospho [T633(99)]	2	1741.99	Q52KI8-1	Serine/arginine repetitive matrix protein 1 [OS=Mus musculus]	Srrm1	-0.652492	-0.303411	0.118378	0.126442	0.0484	0.3172	0.1949	0.2527	0.85333	1	0.63618	0.781725	0.921223	0.746499	0.0001438	0.00116	2.3
[R].TDVSNFDEEFTGEAPTLSPPRDARPLTAAEQAAFR.[D]	1xTMT6plex [N-Term]; 1xPhospho [T/S]	9.99722e-06	7.97536e-05	1	3	1	1	Q63433	Q63433 [903-937]		1	4115.95	Q63433	serine/threonine-protein kinase N1 [OS=Rattus norvegicus]	Pkn1	0.671496	-0.313836	-0.0954959	-0.220628	0.0485	0.2988	0.8843	0.5974	0.702789	0.627855	1	0.818918	0.670821	0.539676	1.072e-05	6.189e-07	4.9
[K].LTTTGQVTSPVK.[G]	1xTMT6plex [K12]; 1xTMT6plex [N-Term]; 1xPhospho [S9(100)]	9.88298e-05	7.97536e-05	1	2	2	16	P97386	P97386 [203-214]	P97386 1xPhospho [S211(100)]	0	1769.98	P97386	DNA ligase 3 [OS=Mus musculus]	Lig3	0.671447	-0.199432	-0.113543	0.0770524	0.0486	0.5369	0.9647	0.3706	0.716567	0.627877	1	0.679301	0.679288	0.591588	1.072e-05	1.029e-05	2.55
[K].ASQPSPPAHEAGYSTLAQSYTSDHPSELPEEPSSPQER.[M]	1xTMT6plex [N-Term]; 2xPhospho [S5(99.9); S/Y/T]	0.0023445	0.000525785	1	2	1	1	P15146	P15146 [624-661]	P15146 2xPhospho [S628(99.9); S/Y/T]	0	4453.93	P15146	microtubule-associated protein 2 [OS=Rattus norvegicus]	Map2	0.67134	-0.227461	-0.0332879	0.279681	0.0487	0.4701	0.6275	0.0621	0.650794	0.627923	1	0.536106	0.64258	0.548851	8.648e-05	0.0005728	4.7
[K].AAQQAASSSGQGQQAQTPTGK.[Q]	1xTMT6plex [K21]; 1xTMT6plex [N-Term]; 1xPhospho [T17(100)]	2.93801e-09	7.97536e-05	1	1	1	7	Q8BK63-1	Q8BK63-1 [305-325]	Q8BK63-1 1xPhospho [T321(100)]	0	2540.25	Q8BK63-1	Casein kinase I isoform alpha [OS=Mus musculus]	Csnk1a1	0.670505	-0.22761	-0.224875	-0.185354	0.0488	0.4697	0.6032	0.7082	0.658244	0.628287	1	0.748486	0.734264	0.627097	1.072e-05	2.901e-11	6.2
[K].NQTMQGTFSK.[L]	1xOxidation [M4]; 1xTMT6plex [K10]; 1xTMT6plex [N-Term]; 1xPhospho [T7(100)]	0.0396466	0.00292753	1	2	1	2	Q91Z58	Q91Z58 [4-13]	Q91Z58 1xPhospho [T10(100)]	0	1695.82	Q91Z58	Uncharacterized protein C6orf132 homolog [OS=Mus musculus]	AI661453	-0.648759	-0.144272	-0.116339	0.226819	0.0489	0.6965	0.9756	0.1036	1	0.896804	0.572007	0.854517	0.972118	0.879607	0.001197	0.01183	1.38
[R].SGFGGMSSPVIRDPEVTR.[T]	1xOxidation [M6]; 1xTMT6plex [N-Term]; 1xPhospho [S/T]	9.97551e-05	7.97536e-05	1	1	1	5	P52590	P52590 [4-21]		1	2217.06	P52590	Nuclear pore complex protein Nup107 [OS=Rattus norvegicus]	Nup107	0.669809	0.191733	-0.0747319	-0.022597	0.049	0.2409	0.7955	0.6925	0.770739	0.62859	1	0.782906	0.662009	0.756104	1.072e-05	1.043e-05	2.24
[K].EVSDDEAEEK.[E]	1xTMT6plex [K10]; 1xTMT6plex [N-Term]; 1xPhospho [S3(100)]	6.86907e-05	7.97536e-05	1	2	1	505	P07901	P07901 [229-238]	P07901 1xPhospho [S231(100)]	0	1688.77	P07901	Heat shock protein HSP 90-alpha [OS=Mus musculus]	Hsp90aa1	-0.64677	-0.0261977	0.0638761	-0.185307	0.0491	0.8953	0.3055	0.7084	0.879462	0.994417	0.635143	1	0.951349	0.93423	1.072e-05	6.558e-06	3.92
[K].SDERPVHIK.[-]	1xTMT6plex [K9]; 1xTMT6plex [N-Term]; 1xPhospho [S1(100)]	0.0689286	0.00544798	1	2	1	1	Q99PP7	Q99PP7 [1134-1142]	Q99PP7 1xPhospho [S1134(100)]	0	1618.87	Q99PP7	E3 ubiquitin-protein ligase TRIM33 [OS=Mus musculus]	Trim33	-0.645213	0.279424	0.0995487	-0.0302813	0.0492	0.117	0.2285	0.7224	0.788356	0.882779	0.564448	0.805078	0.82392	1	0.002255	0.03121	2.54
[R].LALDEGYRMDSDGSEDAEVK.[D]	1xTMT6plex [K20]; 1xTMT6plex [N-Term]; 2xPhospho [S11(100); S14(100)]	3.01403e-06	7.97536e-05	1	2	1	1	Q8CFC2-1	Q8CFC2-1 [81-100]	Q8CFC2-1 2xPhospho [S91(100); S94(100)]	1	2818.23	Q8CFC2-1	Myelin transcription factor 1 [OS=Mus musculus]	Myt1	0.668669	-0.430759	-0.350377	-0.179337	0.0493	0.1601	0.2802	0.728	0.773509	0.629087	1	0.875893	0.802019	0.594995	1.072e-05	1.419e-07	5.72
[K].KEDSDEDEDEEDEDDSDEDEDEEDEFEPPVVK.[G]	2xTMT6plex [K1; K32]; 1xTMT6plex [N-Term]; 2xPhospho [S4(100); S16(100)]	6.24977e-05	5.91125e-05	1	1	1	4	P13383	P13383 [142-173]	P13383 2xPhospho [S145(100); S157(100)]	1	4649.81	P13383	Nucleolin [OS=Rattus norvegicus]	Ncl	-0.644533	-0.0916031	0.0393441	-0.148165	0.0494	0.8691	0.3709	0.8312	0.868952	1	0.6397	0.962937	0.973097	0.913232	5.611e-05	5.72e-05	6.46
[K].ESSEDKNTSESK.[S]	2xTMT6plex [K6; K12]; 1xTMT6plex [N-Term]; 1xPhospho [T8(98.6)]	0.0583996	0.00451759	1	1	1	1	Q6TXG9	Q6TXG9 [123-134]	Q6TXG9 1xPhospho [T130(98.6)]	1	2108.04	Q6TXG9	Swi5-dependent recombination DNA repair protein 1 homolog [OS=Rattus norvegicus]	Sfr1	-0.644033	-0.309729	-0.0318011	0.0262101	0.0495	0.3069	0.622	0.5249	1	0.906105	0.579836	0.981997	0.926299	0.747332	0.001593	0.01688	1.46
[R].VPSPGSSEDDLQEEEQLEQAIK.[E]	1xTMT6plex [K22]; 1xTMT6plex [N-Term]; 1xPhospho [S6(99.3)]	3.42103e-08	7.97536e-05	1	1	4	193	P10362	P10362 [529-550]	P10362 1xPhospho [S534(99.3)]	0	2966.43	P10362	Secretogranin-2 [OS=Rattus norvegicus]	Scg2	0.668136	-0.672558	-0.212748	-0.139791	0.0496	0.0472	0.6446	0.8621	0.736342	0.629319	1	0.811261	0.729314	0.457567	1.072e-05	5.889e-10	6.37
[K].QALYLMFDTPQESPVK.[S]	1xTMT6plex [K16]; 1xTMT6plex [N-Term]; 2xPhospho [T9(100); S13(100)]	1.65763e-05	7.97536e-05	1	4	1	3	Q9JJG0-1	Q9JJG0-1 [747-762]	Q9JJG0-1 2xPhospho [T755(100); S759(100)]	0	2485.19	Q9JJG0-1	Transforming acidic coiled-coil-containing protein 2 [OS=Mus musculus]	Tacc2	-0.643234	-0.0047063	0.213633	0.19502	0.0497	0.8144	0.0763	0.14	0.962478	1	0.640276	0.840783	0.862363	0.859554	1.072e-05	1.147e-06	3.9
[R].QSMAFSILNTPK.[K]	1xTMT6plex [K12]; 1xTMT6plex [N-Term]; 1xPhospho [T10(100)]	0.000477	7.97536e-05	1	1	1	6	E9Q7G0	E9Q7G0 [2028-2039]	E9Q7G0 1xPhospho [T2037(100)]	0	1874.99	E9Q7G0	nuclear mitotic apparatus protein 1 [OS=Mus musculus]	Numa1	0.667962	0.120215	0.276862	0.375907	0.0498	0.4078	0.0412	0.0258	0.688118	0.629395	1	0.530278	0.519493	0.564635	1.072e-05	7.253e-05	2.91
[K].IEDVGSDEEDDSGK.[D]	1xTMT6plex [K14]; 1xTMT6plex [N-Term]; 2xPhospho [S6(100); S12(100)]	4.74939e-05	7.97536e-05	1	1	1	15	P34058	P34058 [250-263]	P34058 2xPhospho [S255(100); S261(100)]	0	2112.87	P34058	Heat shock protein HSP 90-beta [OS=Rattus norvegicus]	Hsp90ab1	-0.64209	-0.0149314	-0.0272777	-0.40118	0.0499	0.8536	0.605	0.2225	0.757239	0.889022	0.569671	1	0.905991	0.896663	1.072e-05	4.187e-06	4.67
