# Supplementary material for: Divalent Metal Transporter 1 Knock-Down Modulates IL-1β Mediated Pancreatic Beta-Cell Pro-Apoptotic Signaling Pathways through the Autophagic Machinery
Source: Int J Mol Sci. 2021 Jul 27;22(15):8013. doi: 10.3390/ijms22158013 (PMC8348373; doi:10.3390/ijms22158013)
Supplement: Supplementary file 1 [file ijms-22-08013-s001.zip › Table S4.xlsx]

## Sheet: S4_Cover
Table S4. The list of GO biological processes of significantly regulated proteins/phosphopeptides in DMT1-KD versus SC
Divalent Metal Transporter 1 knock-down modulates IL-1β mediated pancreatic beta-cell pro-apoptotic signaling pathways through the autophagic machinery
Taewook Kang1,2, Honggang Huang1, Thomas Mandrup-Poulsen3, Martin R. Larsen1,*
1 Protein research group, Department of Biochemistry and Molecular Biology, University of Southern Denmark, 5230 Odense M, Denmark.
2 The Danish Diabetes Academy, Odense, Denmark
3 Immuno-endocrinology Laboratory, Department of Biomedical Sciences, University of Copenhagen, 2200 Copenhagen N, Denmark.
*Corresponding author: Prof. Dr. Martin R. Larsen:
Department of Biochemistry and Molecular Biology, the University of Southern Denmark, Denmark. Tel.: 45-60-111872; E-mail: mrl@bmb.sdu.dk

## Sheet: S4
Term	GOBP	Count	Fold Enrichment	%	PValue	Genes
GO:0006355	regulation of transcription, DNA-templated	134	1.83624	0.127765	1.57e-12	RALY, SNIP1, MED24, PTTG1, MXI1, HMGN5, SMARCD2, CGGBP1, MED26, PQBP1, PSIP1, SAP30L, MAP2K6, MCRS1, MECP2, ZFP629, MTA1, TRERF1, JUNB, DDIT3, ZFP593, SLTM, UHRF1, KDM2B, BAZ1B, RFC1, TRIM33, CDCA7L, PRDM2, VGLL4, SMARCA1, XRN2, SUDS3, CRTC3, HMGB2, HMGB3, TADA3, CRTC1, HDGF, TADA1, MYT1, SOX9, SRF, ARNT, ZC3H8, VDR, EDRF1, TEF, LEO1, HOXA9, RNF10, ASF1B, EWSR1, HNRNPAB, SETDB1, IKZF4, AEBP2, KAT…
GO:0000226	microtubule cytoskeleton organization	22	7.15681	0.0209764	2.31e-12	PARD3, PCNT, SPECC1, MAP1A, MAP1B, NUSAP1, AURKA, CAMSAP3, TACC3, MARK3, TACC2, MARK2, EML3, SON, MAPT, NEFH, VAMP4, CLASP1, MAP7, CLASP2, MAP7D1, PHLDB2
GO:0007049	cell cycle	51	2.594	0.048627	1.38e-09	CLSPN, LZTS1, E2F7, PKMYT1, AURKA, PTTG1, RPS3, MCM8, CDCA8, INCENP, CDCA5, CDCA3, LIN52, LIG3, NUSAP1, UBE2C, ECT2, DDIT3, MCM6, UHRF1, TBRG1, CDK11B, MAPRE2, PELO, MAPK7, UBE2S, MELK, PARD3, FOXM1, LIN9, BRSK2, TIPIN, BEX2, CHEK1, ANLN, BRSK1, NIPBL, CCDC124, USP39, CLASP1, SKA1, CLASP2, CSNK1A1, MKI67, ARPP19, BIRC6, KIF18B, CDC26, SMC3, SON, KIF20B
GO:0006357	regulation of transcription from RNA polymerase II promoter	30	2.35993	0.0286041	3.33e-05	HMGN1, HMGB2, HNF1A, HMGN2, TADA3, GLIS1, TADA1, SOX9, HMGN5, TCEAL3, CGGBP1, SAFB, MED26, TEF, SUPT5, RFX5, NUCKS1, PKN1, TRERF1, JUNB, SLTM, ZFP865, NUPR1, SP1, MAPK14, SP4, SMARCC2, GNAS, RFX2, ZFP367
GO:0006281	DNA repair	26	2.55337	0.0247902	3.52e-05	CLSPN, FOXM1, CHEK1, PTTG1, RPS3, MCM9, SFR1, MCM8, NPM1, RNF168, TRIP12, BOD1L, MCRS1, RAD51AP1, TAOK1, USP1, TRIM28, LIG3, SMG1, SMC3, UHRF1, RFC1, SFPQ, UBR5, ABL1, XRN2
GO:0098609	cell-cell adhesion	17	2.80902	0.016209	0.000387	FMNL2, YWHAZ, LAD1, CREBBP, ANLN, MPRIP, MARK2, EPS15, PLCB3, SLK, SERBP1, BAG3, EIF4H, NDRG1, MKL2, TMPO, EMD
GO:0051028	mRNA transport	11	3.90371	0.0104882	0.000495	SRSF3, HNRNPA3, NUP98, RBM8A, NUP107, CASC3, RANBP2, EIF5A2, HNRNPA1, IWS1, SLBP
GO:0019933	cAMP-mediated signaling	7	6.62448	0.00667429	0.000551	ADCY9, RIMS2, RAPGEF2, SLC9A3R1, SOX9, KSR1, PCLO
GO:0032793	positive regulation of CREB transcription factor activity	5	11.1535	0.00476735	0.000801	CRTC3, CRTC1, VEGFA, CREBBP, LRP8
GO:0016055	Wnt signaling pathway	16	2.34589	0.0152555	0.00362171	CSNK1A1, CSNK1G2, CTNND1, SLC9A3R1, TAX1BP3, DDIT3, CTR9, FZD6, MARK2, CTNNBIP1, RSPO4, CD44, RTF1, LEO1, CSNK1G3, AXIN1
GO:0030073	insulin secretion	6	5.35366	0.00572082	0.00481582	CPLX1, HNF1A, MAFA, VGF, RIMS2, PCLO
GO:0006915	apoptotic process	31	1.69846	0.0295576	0.00540346	BCLAF1, BRSK2, BEX2, ZC3H8, RPS3, PRUNE2, TRIAP1, SLK, SQSTM1, MAPT, BAG3, DAP, FAS, ACIN1, MAP2K6, AXIN1, DFFA, TAOK1, CST3, BIRC6, NOA1, SAP30BP, RHBDD1, DDIT3, SLTM, APOPT1, MAPK14, AVEN, ABL1, MELK, SUDS3
GO:0043547	positive regulation of GTPase activity	12	2.56683	0.0114416	0.00728828	ALS2, ARHGAP6, ARHGEF7, DENND1A, GNAS, MYO9B, SEMA4D, BIN1, RAPGEF2, ECT2, ITGB1, SRGAP2
GO:0006897	endocytosis	13	2.24302	0.0123951	0.0136846	EPS15, DNM1L, CSNK1G2, ATP9B, DENND1A, WIPF2, LRP8, CSNK1G3, BIN1, ABL1, NCL, FCHO2, SGIP1
GO:1903955	positive regulation of protein targeting to mitochondrion	8	3.12297	0.00762776	0.0139869	NKAP, MYBPC1, ZDHHC8, U2AF2, SNIP1, WBP11, RPL28, UBL5
GO:0000281	mitotic cytokinesis	5	5.20495	0.00476735	0.0146443	SON, ANK3, NUSAP1, ANLN, STMN1
GO:0006417	regulation of translation	10	2.58097	0.00953471	0.0156439	LSM14B, RBM4B, RBM8A, MTG1, RBM3, ZFP706, PYM1, CASC3, TNRC6A, RPS3
GO:0045860	positive regulation of protein kinase activity	7	3.41575	0.00667429	0.0162671	ALS2, NPM1, PRKAG2, LRP8, RAPGEF2, PXN, AXIN1
GO:0042127	regulation of cell proliferation	14	1.92606	0.0133486	0.0311019	JARID2, FOXM1, BIRC6, CHEK1, SOX9, JUNB, EPS15, STAT6, DNMT1, CFDP1, NDRG1, FAS, RAPGEF2, MATK
GO:0007030	Golgi organization	7	2.76719	0.00667429	0.0406303	CSNK1A1, ARHGEF7, STX17, NSFL1C, CLASP1, CLASP2, VCPIP1
GO:0072659	protein localization to plasma membrane	6	3.02223	0.00572082	0.0478281	ANK2, ANK3, DENND4C, MAP7, RAPGEF2, FCHO2
