# Supplementary material for: Divalent Metal Transporter 1 Knock-Down Modulates IL-1β Mediated Pancreatic Beta-Cell Pro-Apoptotic Signaling Pathways through the Autophagic Machinery
Source: Int J Mol Sci. 2021 Jul 27;22(15):8013. doi: 10.3390/ijms22158013 (PMC8348373; doi:10.3390/ijms22158013)
Supplement: Supplementary file 1 [file ijms-22-08013-s001.zip › Table S5.xlsx]

## Sheet: S5_Cover
Table S5. The list of all 'classified genes' involved in anti-apoptosis and apoptosis.
Divalent Metal Transporter 1 knock-down modulates IL-1β mediated pancreatic beta-cell pro-apoptotic signaling pathways through the autophagic machinery
Taewook Kang1,2, Honggang Huang1, Thomas Mandrup-Poulsen3, Martin R. Larsen1,*
1 Protein research group, Department of Biochemistry and Molecular Biology, University of Southern Denmark, 5230 Odense M, Denmark.
2 The Danish Diabetes Academy, Odense, Denmark
3 Immuno-endocrinology Laboratory, Department of Biomedical Sciences, University of Copenhagen, 2200 Copenhagen N, Denmark.
*Corresponding author: Prof. Dr. Martin R. Larsen:
Department of Biochemistry and Molecular Biology, the University of Southern Denmark, Denmark. Tel.: 45-60-111872; E-mail: mrl@bmb.sdu.dk

## Sheet: S5
ID	Gene Name		D/S Proteome	D/S Phosphoproteome	DI/SI Proteome	DI/SI Phosphoproteome	Regulated in S/SI	Reference
Abl1	c-abl oncogene 1, non-receptor tyrosine kinase(Abl1)	Apoptosis	-	Up (T812)	-	to normal	No	The Capable ABL: What Is Its Biological Function?, Normal ABL1 is a tumor suppressor and therapeutic target in human and mouse leukemias expressing oncogenic ABL1 kinases
Acin1	apoptotic chromatin condensation inducer 1(Acin1)		-	Up (-4, S798)	-	to normal	No
Aven	apoptosis, caspase activation inhibitor(Aven)	ant-apoptosis	Up	-	to normal	-	No	Aven, a Novel Inhibitor of Caspase Activation, Binds Bcl-xL and Apaf-1
Axin1	axin 1(Axin1)	ant-apoptosis	Up	-	to normal	-	No	Wnt/β-Catenin Signaling and AXIN1 Regulate Apoptosis Triggered by Inhibition of the Mutant Kinase BRAFV600E in Human Melanoma
Bag3	BCL2-associated athanogene 3(Bag3)	ant-apoptosis	Up	-	No change	-	No	BAG3: a multifaceted protein that regulates major cell pathways
Bclaf1	BCL2-associated transcription factor 1(Bclaf1)	Apoptosis	-	Up (S183)	-	decreased, but up	Down	Bclaf1 is an important NF-κB signaling transducer and C/EBPβ regulator in DNA damage-induced senescence
Bex2	brain expressed X-linked 2(Bex2)	ant-apoptosis	Up	-	decreased, but up	-	No	BEX2 regulates mitochondrial apoptosis and G1 cell cycle in breast cancer, Bex2 regulates cell proliferation and apoptosis in malignant glioma cells via the c-Jun NH2-terminal kinase pathway, BEX2 Is Overexpressed in a Subset of Primary Breast Cancers and Mediates Nerve Growth Factor/Nuclear Factor-κB Inhibition of Apoptosis in Breast Cancer Cell Lines
Birc6	baculoviral IAP repeat-containing 6(Birc6)	ant-apoptosis	-	Up (S593)	-	to normal	No	The Birc6 (Bruce) gene regulates p53 and the mitochondrial pathway of apoptosis and is essential for mouse embryonic development, Dual Role of BRUCE as an Antiapoptotic IAP and a Chimeric E2/E3 Ubiquitin Ligase
Brsk2	BR serine/threonine kinase 2(Brsk2)	ant-apoptosis	-	Up (-2, S513,S514,S/T)	-	to normal	No	BRSK2 is regulated by ER stress in protein level and involved in ER stress-induced apoptosis
Cst3	cystatin C(Cst3)	Apoptosis	Down	-	-	to normal	No	Argument.. Up-regulation of calsyntenin-3 by b-amyloid increases vulnerability of cortical neurons
Dap	death-associated protein(Dap)	Apoptosis	Down	Up (S49)	down	down	Up and no	Death associated proteins (DAPs): from gene identification to the analysis of their apoptotic and tumor suppressive functions., DAP1, a Novel Substrate of mTOR, Negatively Regulates Autophagy, The Ubiquitin-homology Protein, DAP-1, Associates with Tumor Necrosis Factor Receptor (p60) Death Domain and Induces Apoptosis, DAP1, a Negative Regulator of Autophagy, Controls SubAB-Mediated Apoptosis and…
Ddit3	DNA-damage inducible transcript 3(Ddit3)	Apoptosis	Down	-	increased, but down	-	Up	Endoplasmic reticulum stress contributes to beta cell apoptosis in type 2 diabetes
Dffa	DNA fragmentation factor, alpha subunit(Dffa)	ant-apoptosis	Up (-1 and -2)	-	decreased to normal	-	No	Inhibitor of the caspase-activated DNase (DFF40), Apoptotic DNA fragmentation and tissue homeostasis,
Fas	Fas (TNF receptor superfamily member 6)(Fas)	Apoptosis/ant-apoptosis	Up	-	more up	-	Up	Protection from Fas-mediated apoptosis by a soluble form of the Fas molecule, The polypeptide encoded by the cDNA for human cell surface antigen Fas can mediate apoptosis
Map2k6	mitogen-activated protein kinase kinase 6(Map2k6)		Up	-	more up	-	No
Mapk14	mitogen-activated protein kinase 14(Mapk14)		Up (-2)	-	decreased, but up		Up
Mapt	microtubule-associated protein tau(Mapt)
Melk	maternal embryonic leucine zipper kinase(Melk)	Apoptosis/ant-apoptosis	-	Up( S521)	-	decreased, but up	No	MELK—a conserved kinase: functions, signaling, cancer, and controversy
Noa1	nitric oxide associated 1(Noa1)	ant-apoptosis	Up	-	to normal	-	No	Nitric Oxide-associated Protein 1 (NOA1) Is Necessary for Oxygen-dependent Regulation of Mitochondrial Respiratory Complexes
Prune2	prune homolog 2(Prune2)	ant-apoptosis	Up	-	decreased, but up	-	No	How apoptotic β-cells direct immune response to tolerance or to autoimmune diabetes: a review
Rhbdd1	rhomboid domain containing 1(Rhbdd1)	ant-apoptosis	Up	-	to normal	-	No	A novel member of the Rhomboid family, RHBDD1, regulates BIK-mediated apoptosis
Rps3	ribosomal protein S3(Rps3)	Apoptosis	-	Up (T221)	-	to normal	No	PKCδ-dependent functional switch of rpS3 between translation and DNA repair
Rybp	RING1 and YY1 binding protein(Rybp)	Apoptosis	-	Up (S99)	-	to normal	No	Rybp interacts with Hippi and enhances Hippi-mediated apoptosis
Sap30bp	SAP30 binding protein(Sap30bp)	Apoptosis	-	Up (S113)	-	to normal	No	HTRP—An Immediate-Early Gene Product Induced by HSV1 Infection in Human Embryo Fibroblasts, Is Involved in Cellular Co-Repressors
Slk	STE20-like kinase(Slk)	Apoptosis	-	Up (T386, T1065)	-	to normal	No	Caspase 3 Cleavage of the Ste20-Related Kinase SLK Releases and Activates an Apoptosis-Inducing Kinase Domain and an Actin-Disassembling Region, Induction of apoptosis by SLK, a Ste20-related kinase, The Ste20-like kinase SLK promotes p53 transactivation and apoptosis, Ste20-like kinase SLK, at the crossroads
Sltm	SAFB-like, transcription modulator(Sltm)	Apoptosis	-	Down (-2, S199)	-	increased, but down	Up	A novel member of the SAF (scaffold attachment factor)-box protein family inhibits gene expression and induces apoptosis
Sqstm1	sequestosome 1(Sqstm1)	Apoptosis/ant-apoptosis	Up	Up (T266)	decreased	to scramble+IL1b	Up, Up	p62/SQSTM1/A170: Physiology and pathology, Serine 403 Phosphorylation of p62/SQSTM1 Regulates Selective Autophagic Clearance of Ubiquitinated Proteins,p62 at the Crossroads of Autophagy, Apoptosis, and Cancer
Suds3	suppressor of defective silencing 3 homolog (S. cerevisiae)(Suds3)	Apoptosis	-	Up (S45)	-	decreased, but up	No
Taok1	TAO kinase 1(Taok1)	Apoptosis	-	Up (T576)	-	to normal	No	Human TAO kinase 1 induces apoptosis in SH-SY5Y cells
Triap1	TP53 regulated inhibitor of apoptosis 1(Triap1)	ant-apoptosis	Down	-	increased to normal	-	No	TRIAP1/PRELI Complexes Prevent Apoptosis by Mediating Intramitochondrial Transport of Phosphatidic Acid
Zc3h8	zinc finger CCCH type containing 8(Zc3h8)	ant-apoptosis	Up	-	decreased to scramble+IL1b		No	The CCCH-type zinc finger transcription factor Zc3h8 represses NF-κB–mediated inflammation in digestive organs in zebrafish
