# Supplementary material for: Divalent Metal Transporter 1 Knock-Down Modulates IL-1β Mediated Pancreatic Beta-Cell Pro-Apoptotic Signaling Pathways through the Autophagic Machinery
Source: Int J Mol Sci. 2021 Jul 27;22(15):8013. doi: 10.3390/ijms22158013 (PMC8348373; doi:10.3390/ijms22158013)
Supplement: Supplementary file 1 [file ijms-22-08013-s001.zip › Table S6.xlsx]

## Sheet: S6_Cover
Table S6. The list of inflammation-protective proteins and phosphopeptides.
Divalent Metal Transporter 1 knock-down modulates IL-1β mediated pancreatic beta-cell pro-apoptotic signaling pathways through the autophagic machinery
Taewook Kang1,2, Honggang Huang1, Thomas Mandrup-Poulsen3, Martin R. Larsen1,*
1 Protein research group, Department of Biochemistry and Molecular Biology, University of Southern Denmark, 5230 Odense M, Denmark.
2 The Danish Diabetes Academy, Odense, Denmark
3 Immuno-endocrinology Laboratory, Department of Biomedical Sciences, University of Copenhagen, 2200 Copenhagen N, Denmark.
*Corresponding author: Prof. Dr. Martin R. Larsen:
Department of Biochemistry and Molecular Biology, the University of Southern Denmark, Denmark. Tel.: 45-60-111872; E-mail: mrl@bmb.sdu.dk

## Sheet: S6-Proteome
Master Protein Accessions	Description	Gene symbols	Gene	Log2 ratio: DMT1 KD/ Scrambled	Log2 ratio: (+IL-1b) DMT1 KD/ Scrambled	Log2 ratio: Scrambled/Scrambled+ IL-1b	Log2 ratio: Control/ Control+ IL-1b	Adjusted p-value: DMT1 KD/ Scrambled	Adjusted p-value: (+IL-1b) DMT1 KD/ Scrambled	Adjusted p-value:: Scrambled/Scrambled+ IL-1b	Adjusted p-value:: Control/ Control+ IL-1b	Control	Scrambled	DMT1 KD	Control +IL-1b	Scrambled +IL-1b	DMT1 KD +IL-1b	Coverage [%]	# Peptides	# PSMs	# Unique Peptides	Score Sequest HT: Sequest HT
Q00238	Intercellular adhesion molecule 1 [OS=Rattus norvegicus]	Icam1	Icam1	0.190079	-0.629108	-1.81062	-1.8743	0.729028	0.000590827	5.14477e-12	1.29463e-09	0.27276	0.268948	0.306823	1	0.943455	0.610015	23	12	41	12	132.05
P02803	Metallothionein-1 [OS=Rattus norvegicus]	Mt1a; Mt1; LOC100125598	Mt1a	1.07553	-0.518381	-0.724488	-0.725503	5.88538e-07	0.00323458	0.000134646	0.00111591	0.563174	0.474497	1	0.931195	0.784018	0.547366	13	1	2	1	6.01
Q62857	DNA damage-inducible transcript 3 protein [OS=Rattus norvegicus]	Ddit3	Ddit3	-0.76202	-0.380455	-0.588587	-0.795875	0.0212235	0.0227623	0.00118708	0.00045989	0.575994	0.617372	0.364046	1	0.928388	0.713183	11	2	3	2	7.7
F1M391	Stimulator of interferon genes protein [OS=Rattus norvegicus]	Tmem173	Tmem173	0.22083	-0.364348	-0.575654	-0.628988	0.64221	0.0281453	0.00145112	0.00366548	0.64663	0.609821	0.710688	1	0.908848	0.706012	2	1	1	1	3.34
Q8R5M8	Cell adhesion molecule 1 [OS=Mus musculus]	Cadm1	Cadm1	0.0932622	-0.443425	-0.569566	-0.661043	0.992296	0.00960051	0.00159427	0.00247982	0.632421	0.616337	0.657496	1	0.914691	0.672652	9	3	6	2	16.43
P28660	Nck-associated protein 1 [OS=Mus musculus]	Nckap1	Nckap1	0.528685	-0.360841	-0.553963	-0.3477	0.0722311	0.0294622	0.0020261	0.0839703	0.700064	0.681146	0.982631	0.890853	1	0.778711	32	30	66	30	206.62
P02535-1	Keratin, type I cytoskeletal 10 [OS=Mus musculus]	Krt10	Krt10	0.989909	-0.428581	-0.55052	-0.352769	1.02899e-05	0.0118206	0.00213554	0.0798747	0.589432	0.503509	1	0.75271	0.737447	0.547917	12	7	26	1	79.16
Q78T81	Protein FAM102A [OS=Mus musculus]	Fam102a	Fam102a	0.730789	-0.457526	-0.50536	-0.245846	0.00449938	0.00786008	0.00421533	0.214292	0.620538	0.602574	1	0.735827	0.855341	0.622888	14	4	37	4	133.54
Q8K2J7	RELT-like protein 1 [OS=Mus musculus]	Rell1	Rell1	0.0203432	-0.462587	-0.428192	-0.228199	0.792938	0.00731149	0.0128199	0.248477	0.779721	0.743193	0.753747	0.913343	1	0.725684	18	4	6	4	20.46
Q71QF9	Prickle-like protein 1 [OS=Rattus norvegicus]	Prickle1	Prickle1	0.215241	-0.458182	-0.40579	-0.0870224	0.657809	0.00778688	0.017468	0.680568	0.812379	0.754823	0.876272	0.862889	1	0.727903	4	3	10	3	31.84
Q3UH66-4	Isoform 4 of Serine/threonine-protein kinase WNK2 [OS=Mus musculus]	Wnk2	Wnk2	0.444262	-0.612866	-0.394527	0.048243	0.16051	0.000762482	0.020356	0.710571	0.885539	0.73496	1	0.856417	0.966113	0.631738	13	26	56	16	183.77
O54902-2	Isoform 1 of Natural resistance-associated macrophage protein 2 [OS=Rattus norvegicus]	Slc11a2	Slc11a2	-0.223572	-0.481289	-0.384524	-0.588288	0.307193	0.00558269	0.0232841	0.00597589	0.665132	0.732012	0.626926	1	0.95559	0.684525	2	1	1	1	4.97
Q7TP40	PEST proteolytic signal-containing nuclear protein [OS=Rattus norvegicus]	Pcnp	Pcnp	0.417577	-0.610797	-0.382976	-0.382793	0.199336	0.000787569	0.0237704	0.0590475	0.766951	0.694129	0.927135	1	0.905164	0.592733	61	11	106	11	336.36
P26644	Beta-2-glycoprotein 1 [OS=Rattus norvegicus]	Apoh	Apoh	0.347322	-1.01852	-0.370121	-0.452925	0.327996	9.9497e-07	0.0281845	0.0281162	0.73056	0.76942	0.978855	1	0.994446	0.490881	3	1	6	1	23.16
O35103	osteomodulin [OS=Mus musculus]	Omd	Omd	0.459964	-0.876165	-0.36764	-0.513345	0.140223	1.0576e-05	0.0291185	0.0143206	0.700596	0.713574	0.981527	1	0.920682	0.5016	2	1	1	1	2.8
Q8R460	Interleukin-36 gamma [OS=Mus musculus]	Il1f9	Il1f9	0.931173	-0.58055	-0.36221	-0.121431	5.57852e-05	0.0012598	0.0312613	0.548923	0.627597	0.524432	1	0.682708	0.674101	0.450778	7	1	2	1	4.95
Q9ERB5	solute carrier organic anion transporter family member 1C1 [OS=Mus musculus]	Slco1c1	Slco1c1	0.177436	-0.53803	-0.35488	0.0490844	0.765281	0.00240958	0.0343825	0.706775	0.955111	0.781935	0.884268	0.923162	1	0.688711	1	1	1	1	1.71
A2APV2-1	Formin-like protein 2 [OS=Mus musculus]	Fmnl2	Fmnl2	0.5796	-0.37349	-0.332205	-0.0534387	0.0406722	0.0249618	0.0459073	0.822653	0.811775	0.669149	1	0.842408	0.842416	0.650272	4	3	5	1	18.37
Q8VEL2	Myotubularin-related protein 14 [OS=Mus musculus]	Mtmr14	Mtmr14	-0.0407441	-0.744258	-0.328408	-0.243317	0.64215	9.29753e-05	0.0481458	0.218947	0.784121	0.796415	0.774238	0.928172	1	0.596975	1	1	2	1	2.41
Q9D0G0	28S ribosomal protein S30, mitochondrial [OS=Mus musculus]	Mrps30	Mrps30	0.503066	-0.342265	-0.313728	-0.133995	0.0938249	0.037422	0.0577458	0.5049	0.837149	0.705605	1	0.918628	0.877008	0.691785	3	1	2	1	8.13
Q5XF89-1	probable cation-transporting ATPase 13A3 [OS=Mus musculus]	Atp13a3	Atp13a3	-0.124842	0.380482	0.261175	0.159452	0.465748	0.00503469	0.0578967	0.283739	0.893996	0.92063	0.844314	0.800453	0.768181	1	1	1	1	1	3.78
Q9CXD6-1	mitochondrial calcium uniporter regulator 1 [OS=Mus musculus]	Ccdc90a; Mcur1	Ccdc90a	-0.100353	0.656767	0.264016	0.274624	0.513166	5.89684e-08	0.0549552	0.0633024	0.878224	0.761676	0.710495	0.725998	0.634298	1	5	2	4	1	12.74
P16290	phosphoglycerate mutase 2 [OS=Rattus norvegicus]	Pgam2	Pgam2	-0.434071	0.407387	0.28596	0.399137	0.114047	0.00237988	0.036037	0.00544595	1	0.88573	0.655591	0.758312	0.726472	0.963507	22	6	219	1	678.85
Q9ERS2	NADH dehydrogenase [ubiquinone] 1 alpha subcomplex subunit 13 [OS=Mus musculus]	Ndufa13	Ndufa13	0.10615	0.324761	0.305352	0.151561	0.970981	0.0195409	0.024106	0.307527	0.903857	0.929064	1	0.813721	0.75184	0.941647	29	4	16	4	58.56
B2RZC4	protein Mis18-alpha [OS=Rattus norvegicus]	Mis18a	Mis18a	-0.0100522	0.310573	0.311549	0.219539	0.715726	0.026534	0.0210731	0.140552	0.967848	1	0.993057	0.831226	0.805776	0.999323	4	1	2	1	1.78
Q3B7T8	centrosomal protein of 44 kDa [OS=Rattus norvegicus]	Cep44	Cep44	-0.647959	0.330947	0.317763	0.2284	0.0383869	0.0170183	0.0183603	0.124927	0.913581	0.990903	0.632377	0.779815	0.795014	1	7	1	2	1	3.74
Q6NX65	programmed cell death protein 10 [OS=Rattus norvegicus]	Pdcd10	Pdcd10	-0.339024	0.409183	0.32908	0.183337	0.18094	0.00225856	0.0141744	0.218822	0.812037	0.94599	0.747877	0.715132	0.75305	1	49	7	18	7	78.39
P51639	3-hydroxy-3-methylglutaryl-coenzyme a reductase [OS=Rattus norvegicus]	Hmgcr	Hmgcr	0.420747	0.425664	0.333545	0.128815	0.194433	0.00137779	0.0127628	0.382417	0.715663	0.747038	1	0.654533	0.592837	0.796293	5	3	3	3	6.32
Q80YR7	Claspin [OS=Mus musculus]	Clspn	Clspn	0.582097	0.397891	0.333768	0.219432	0.0394649	0.00312331	0.0126953	0.14075	0.687936	0.667992	1	0.590871	0.530026	0.698352	6	7	28	7	82.45
Q9JIA7	Sphingosine kinase 2 [OS=Mus musculus]	Sphk2	Sphk2	-0.239368	0.448145	0.341978	0.154596	0.286434	0.000673415	0.0104228	0.298239	0.784056	0.929053	0.787016	0.704383	0.732985	1	2	1	2	1	5.82
P38585	Tubulin--tyrosine ligase [OS=Mus musculus]	Ttl	Ttl	-0.225313	0.490133	0.370726	0.135999	0.304847	0.000154376	0.00499736	0.357769	0.910938	0.920566	0.787461	0.828989	0.71196	1	19	6	8	1	22.72
Q63941	Ras-related protein Rab-3B [OS=Rattus norvegicus]	Rab3b	Rab3b	0.00540483	0.58572	0.420693	0.111687	0.75448	2.59734e-06	0.00116991	0.444689	0.840199	0.891912	0.895259	0.777608	0.666317	1	58	12	56	6	209.69
Q9D083-1	kinetochore protein SPC24 [OS=Mus musculus]	Spc24	Spc24	0.0423187	0.339608	0.477661	0.336907	0.851159	0.0139539	0.000166266	0.0209723	0.923105	0.971093	1	0.730856	0.697382	0.882476	8	1	5	1	29.25
Q91Z80	Liprin-alpha-4 [OS=Rattus norvegicus]	Ppfia4	Ppfia4	-0.0621816	0.476799	0.486851	-0.0635433	0.593585	0.000251378	0.000117567	0.778691	0.836016	1	0.957815	0.873661	0.713581	0.993057	6	8	14	2	38.89
P00159	cytochrome b [OS=Rattus norvegicus]	CYTB	CYTB	-0.355483	0.392177	0.498157	0.288829	0.167281	0.00366397	7.57881e-05	0.0501933	0.908202	1	0.781608	0.743423	0.708011	0.929174	4	2	2	2	5.24
P0CD94	Ubiquinol-cytochrome-c reductase complex assembly factor 3 [OS=Rattus norvegicus]	LOC686324; LOC690344; Uqcc3	Uqcc3	0.296125	0.99063	0.501481	0.509886	0.444352	0	6.64296e-05	0.000243105	0.69494	0.712445	0.874771	0.488041	0.503258	1	8	1	1	1	2.45
O09015	Max-interacting protein 1 [OS=Rattus norvegicus]	Mxi1	Mxi1	0.716818	0.507468	0.562141	0.769341	0.00571088	7.9587e-05	4.77819e-06	1.5171e-09	0.708561	0.608438	1	0.415702	0.412093	0.585812	6	1	2	1	8.42
P13053	Vitamin D3 receptor [OS=Rattus norvegicus]	Vdr	Vdr	-0.641881	0.29364	0.954414	0.804231	0.039615	0.0374822	0	1.60061e-10	0.86825	1	0.640877	0.497218	0.516051	0.632539	4	1	1	1	4.3

## Sheet: S6-phosphoproteome
Annotated Sequence	Modifications	Qvality PEP	Qvality q-value	# Protein Groups	# Proteins	# Isoforms	# PSMs	Master Protein Accessions	Positions in Master Proteins	Modifications in Master Proteins	# Missed Cleavages	Theo. MH+ [Da]	Accession	Description	Gene symbols	Gene	Log2 ratio: DMT1 KD/ Scrambled	Log2 ratio: (+IL-1b) DMT1 KD/ Scrambled	Log2 ratio: Scrambled/Scrambled+ IL-1b	Log2 ratio: Control/ Control+ IL-1b	Adjusted p-value: DMT1 KD/ Scrambled	Adjusted p-value: (+IL-1b) DMT1 KD/ Scrambled	Adjusted p-value:: Scrambled/Scrambled+ IL-1b	Adjusted p-value:: Control/ Control+ IL-1b	Control	Scrambled	DMT1 KD	Control +IL-1b	Scrambled +IL-1b	DMT1 KD +IL-1b	Percolator q-Value (by Search Engine): Sequest HT	Percolator PEP (by Search Engine): Sequest HT	XCorr (by Search Engine): Sequest HT
[R].ESTHQSEDVFLPSPR.[D]	1xTMT6plex [N-Term]; 1xPhospho [S13(100)]	0.000680918	7.97536e-05	1	1	1	2	P97393	P97393 [956-970]	P97393 1xPhospho [S968(100)]	0	2037.95	P97393	Rho GTPase-activating protein 5 [OS=Mus musculus]	Arhgap5	Arhgap5	-0.239836	-1.22018	-0.662574	-0.558347	0.2268	0.0077	0.0449	0.0908	0.643647	0.63175	0.534992	0.947823	1	0.429228	1.072e-05	0.0001137	2.84
[KR].RASSPFRR.[V]	1xTMT6plex [N-Term]; 1xPhospho [S]	0.119963	0.00883208	1	3	2	4	P41777	P41777 [625-632]		2	1285.67	P41777	nucleolar and coiled-body phosphoprotein 1 [OS=Rattus norvegicus]	Nolc1	Nolc1	0.630858	-1.10527	-0.633327	-0.436658	0.0633	0.0118	0.0544	0.182	0.651391	0.644688	0.99829	0.881636	1	0.464815	0.002688	0.03313	2.22
[K].AGKESEEEEEDTEQNK.[K]	2xTMT6plex [K3; K16]; 1xTMT6plex [N-Term]; 1xPhospho [S5(100)]	2.02901e-07	7.97536e-05	1	1	1	111	P41777	P41777 [563-578]	P41777 1xPhospho [S567(100)]	1	2619.23	P41777	nucleolar and coiled-body phosphoprotein 1 [OS=Rattus norvegicus]	Nolc1	Nolc1	0.0926539	-1.09264	-0.805357	-0.413477	0.835	0.012	0.0231	0.2069	0.682327	0.57222	0.610176	0.908786	1	0.468904	1.072e-05	5.199e-09	5.69
[R].ERSDSGGSSSEPFER.[H]	1xTMT6plex [N-Term]; 1xPhospho [S5(100)]	3.02818e-06	7.97536e-05	1	2	1	7	Q6MG48	Q6MG48 [758-772]	Q6MG48 1xPhospho [S762(100)]	1	1935.83	Q6MG48	Protein PRRC2A [OS=Rattus norvegicus]	Prrc2a	Prrc2a	0.284029	-0.951051	-0.662537	-0.270073	0.6458	0.017	0.045	0.4622	0.750604	0.631767	0.769233	0.90513	1	0.517255	1.072e-05	1.431e-07	5.01
[R].RLSSASTGKPPLSVEDDFEK.[L]	2xTMT6plex [K9; K20]; 1xTMT6plex [N-Term]; 1xPhospho [S3(100)]	1.61299e-09	7.97536e-05	1	1	1	12	Q6NZF1	Q6NZF1 [738-757]	Q6NZF1 1xPhospho [S740(100)]	1	2930.55	Q6NZF1	Zinc finger CCCH domain-containing protein 11A [OS=Mus musculus]	Zc3h11a	Zc3h11a	-0.470856	-0.886523	-0.697382	-0.512319	0.087	0.0202	0.0378	0.1182	0.701094	0.587011	0.42355	1	0.951873	0.514883	1.072e-05	1.395e-11	6.86
[R].LLSFRSMEETRPVPTVK.[E]	1xTMT6plex [K17]; 1xTMT6plex [N-Term]; 2xPhospho [S3(100); S6(100)]	0.00177412	0.00046153	1	2	1	4	Q5SSH7-1	Q5SSH7-1 [1533-1549]	Q5SSH7-1 2xPhospho [S1535(100); S1538(100)]	1	2608.34	Q5SSH7-1	Zinc finger ZZ-type and EF-hand domain-containing protein 1 [OS=Mus musculus]	Zzef1	Zzef1	0.141389	-0.863692	-0.852119	-1.13153	0.9578	0.0224	0.0183	0.0087	0.45643	0.465019	0.512901	1	0.83943	0.461304	6.971e-05	0.0003989	2.94
[R].NHPDSELESTANRHSEETEEERSYEGAK.[G]	1xTMT6plex [K28]; 1xTMT6plex [N-Term]; 4xPhospho [S15(99.9); T18(100); S23(100); S/T/Y]	3.12221e-07	7.97536e-05	1	1	2	9	O35314	O35314 [383-410]	O35314 4xPhospho [S397(99.9); T400(100); S405(100); S/T/Y]	2	4009.6	O35314	Secretogranin-1 [OS=Rattus norvegicus]	Chgb	Chgb	0.623866	-0.831457	-1.02609	-1.18717	0.0667	0.0252	0.0089	0.0073	0.439164	0.411957	0.634824	1	0.83895	0.471457	1.072e-05	8.837e-09	7.51
[K].SPTIPR.[A]	1xTMT6plex [N-Term]; 1xPhospho [S1(100)]	0.0891231	0.00636892	1	1	1	4	Q99LJ0	Q99LJ0 [567-572]	Q99LJ0 1xPhospho [S567(100)]	0	979.518	Q99LJ0	CTTNBP2 N-terminal-like protein [OS=Mus musculus]	Cttnbp2nl	Cttnbp2nl	-0.787084	-0.825975	-0.896357	-0.499319	0.037	0.026	0.0151	0.1268	0.651983	0.537242	0.311339	0.921608	1	0.564101	0.002095	0.02499	1.84
[R].GRASSHSSQSQGGGSVTK.[K]	1xTMT6plex [K18]; 1xTMT6plex [N-Term]; 3xPhospho [S4(100); S7(100); S8(100)]	9.88298e-05	7.97536e-05	2	4	1	1	P48678-1; P48678-2	P48678-1 [400-417]; P48678-2 [400-417]	P48678-1 3xPhospho [S403(100); S406(100); S407(100)]; P48678-2 3xPhospho [S403(100); S406(100); S407(100)]	1	2416.05	P48678-1	Prelamin-A/C [OS=Mus musculus]	Lmna	Lmna	-0.248967	-0.75588	-0.633925	-0.153823	0.2172	0.0349	0.0541	0.8104	0.804684	0.644421	0.542279	0.895222	1	0.592185	1.072e-05	1.03e-05	3.86
[K].ARSMSPPPK.[R]	1xTMT6plex [K9]; 1xTMT6plex [N-Term]; 2xPhospho [S3(100); S5(100)]	0.000204034	7.97536e-05	1	1	1	85	Q3TWW8	Q3TWW8 [312-320]	Q3TWW8 2xPhospho [S314(100); S316(100)]	1	1588.77	Q3TWW8	Serine/arginine-rich splicing factor 6 [OS=Mus musculus]	Srsf6	Srsf6	0.181558	-0.754549	-0.644425	-0.135264	0.9297	0.0352	0.0513	0.8785	0.796262	0.639748	0.725543	0.87453	1	0.592732	1.072e-05	2.514e-05	3.5
[K].QADVADQQTTELPAENGETENQSPASEEEK.[E]	1xTMT6plex [K30]; 1xTMT6plex [N-Term]; 1xPhospho [S26(100)]	0.00153737	0.000322997	1	1	1	11	P18608	P18608 [62-91]	P18608 1xPhospho [S87(100)]	0	3783.71	P18608	Non-histone chromosomal protein HMG-14 [OS=Mus musculus]	Hmgn1; LOC100044391; LOC102641809	Hmgn1	0.485279	-0.726703	-0.847527	-0.545885	0.1969	0.0384	0.0187	0.098	0.582533	0.555737	0.777952	0.85045	1	0.604283	5.222e-05	0.0003287	4.76
[K].LPSISDLDSIFGPVLSPK.[S]	1xTMT6plex [K18]; 1xTMT6plex [N-Term]; 2xPhospho [S3(100); S16(100)]	0.0135769	0.00128835	1	4	1	1	P0DJJ3	P0DJJ3 [285-302]	P0DJJ3 2xPhospho [S287(100); S300(100)]	0	2503.29	P0DJJ3	SH3-containing GRB2-like protein 3-interacting protein 1 [OS=Rattus norvegicus]	Sgip1	Sgip1	-0.330431	-0.684951	-0.852593	-0.756759	0.1514	0.0444	0.018	0.0349	0.510119	0.553788	0.440427	0.861944	1	0.622027	0.0004638	0.004301	3.04
[K].DSTSQHDDDNISTTSGFSSR.[A]	1xTMT6plex [N-Term]; 1xPhospho [S/T]	2.67183e-05	7.97536e-05	1	1	2	6	P49791	P49791 [172-191]		0	2466.03	P49791	Nuclear pore complex protein Nup153 [OS=Rattus norvegicus]	Nup153	Nup153	1.12552	-0.670007	-0.837451	-0.506845	0.0054	0.048	0.0199	0.1219	0.520923	0.458336	1	0.740199	0.818996	0.514742	1.072e-05	2.066e-06	3.29
[K].GAMDSQFANEDAESQK.[F]	1xOxidation [M3]; 1xTMT6plex [K16]; 1xTMT6plex [N-Term]; 1xPhospho [S14(100)]	1.30628e-07	7.97536e-05	1	1	1	29	Q9EQ25	Q9EQ25 [36-51]	Q9EQ25 1xPhospho [S49(100)]	0	2282	Q9EQ25	Sodium-coupled neutral amino acid transporter 4 [OS=Rattus norvegicus]	Slc38a4	Slc38a4	-0.387133	-0.667825	-0.748795	-0.902409	0.1202	0.0485	0.0293	0.0185	0.534993	0.496034	0.379291	1	0.833529	0.524669	1.072e-05	3.04e-09	5.51
[K].GENENSKFEVR.[L]	1xTMT6plex [K7]; 1xTMT6plex [N-Term]; 1xPhospho [S6(100)]	0.0001319	7.97536e-05	1	1	1	9	O35314	O35314 [74-84]	O35314 1xPhospho [S79(100)]	1	1846.91	O35314	Secretogranin-1 [OS=Rattus norvegicus]	Chgb	Chgb	-0.160624	-0.657182	-0.713734	-0.369273	0.3241	0.0515	0.0347	0.2658	0.715162	0.60974	0.545497	0.923777	1	0.634116	1.072e-05	1.465e-05	3.52
[K].DEGEQEEEGETEAEGEGEEAEAK.[E]	1xTMT6plex [K23]; 1xTMT6plex [N-Term]; 1xPhospho [T11(100)]	1.07801e-07	7.97536e-05	1	1	1	3	P12839	P12839 [554-576]	P12839 1xPhospho [T564(100)]	0	3019.25	P12839	Neurofilament medium polypeptide [OS=Rattus norvegicus]	Nefm	Nefm	0.228167	0.37855	0.416317	-0.11686	0.8063	0.0458	0.0101	0.949	0.717403	0.853719	1	0.777932	0.639721	0.83166	1.072e-05	2.401e-09	4.36
[K].LPPASTPTSPSSPGLSPVPPPDK.[V]	1xTMT6plex [K23]; 1xTMT6plex [N-Term]; 1xPhospho [S11(95.7)]	0.000923685	7.97536e-05	1	2	3	4	Q80W83	Q80W83 [5-27]	Q80W83 1xPhospho [S15(95.7)]	0	2764.46	Q80W83	Serine/threonine-protein phosphatase 2A 56 kDa regulatory subunit beta isoform [OS=Rattus norvegicus]	LOC100909468; Ppp2r5b	Ppp2r5b	-0.0735708	0.37956	0.28895	-0.221341	0.4646	0.0453	0.0374	0.5951	0.788751	0.939125	0.892435	0.91954	0.768672	1	1.072e-05	0.0001683	2.81
[R].SNTPESIAETPPAR.[D]	1xTMT6plex [N-Term]; 2xPhospho [T3(100); T10(100)]	0.007261	0.000930136	1	1	1	1	P81122	P81122 [515-528]	P81122 2xPhospho [T517(100); T524(100)]	0	1858.82	P81122	Insulin receptor substrate 2 [OS=Mus musculus]	Irs2	Irs2	-0.0207175	0.382749	0.254342	0.382493	0.5643	0.0441	0.0539	0.0242	0.933081	0.914841	0.901798	0.715776	0.766975	1	0.0002665	0.002244	3.13
[R].DGGAASPATEGR.[G]	1xTMT6plex [N-Term]; 1xPhospho [S6(100)]	0.0001319	7.97536e-05	2	2	1	20	Q80TV8-2; Q80TV8-1	Q80TV8-2 [1205-1216]; Q80TV8-1 [1215-1226]	Q80TV8-2 1xPhospho [S1210(100)]; Q80TV8-1 1xPhospho [S1220(100)]	0	1397.63	Q80TV8-2	Isoform 2 of CLIP-associating protein 1 [OS=Mus musculus]	Clasp1	Clasp1	0.0586348	0.39035	0.355287	0.00844757	0.75	0.0413	0.0191	0.5832	0.90458	0.960172	1	0.899299	0.75058	0.983794	1.072e-05	1.47e-05	4.01
[R].MSPMGTASGSNSPTSDSASVQR.[A]	2xOxidation [M1; M4]; 1xTMT6plex [N-Term]; 1xPhospho [S2(100)]	4.73781e-09	7.97536e-05	1	2	2	12	B5DF11	B5DF11 [47-68]	B5DF11 1xPhospho [S48(100)]	0	2496.06	B5DF11	AN1-type zinc finger protein 5 [OS=Rattus norvegicus]	Zfand5	Zfand5	-0.421777	0.401999	0.315898	0.0872318	0.1046	0.0381	0.0287	0.3446	0.824043	0.942065	0.703256	0.775694	0.756809	1	1.072e-05	5.22e-11	5.45
[K].SHSSPGSSK.[S]	1xTMT6plex [K9]; 1xTMT6plex [N-Term]; 1xPhospho [S4(100)]	0.000272922	7.97536e-05	2	5	2	12	Q9QYX7-1; Q9JKS6	Q9QYX7-1 [4803-4811]; Q9JKS6 [4820-4828]	Q9QYX7-1 1xPhospho [S4806(100)]; Q9JKS6 1xPhospho [S4823(100)]	0	1411.7	Q9QYX7-1	Protein piccolo [OS=Mus musculus]	Pclo	Pclo	0.146632	0.402018	0.308729	0.483405	0.9716	0.038	0.0304	0.0093	0.994656	0.903357	1	0.711465	0.729328	0.963701	1.072e-05	3.611e-05	3.09
[R].TLFLGIPDENFEDHSAPPSPEEK.[D]	1xTMT6plex [K23]; 1xTMT6plex [N-Term]; 1xPhospho [S19(100)]	0.000169511	7.97536e-05	1	1	1	5	O35099	O35099 [1022-1044]	O35099 1xPhospho [S1040(100)]	0	3107.5	O35099	Mitogen-activated protein kinase kinase kinase 5 [OS=Mus musculus]	Map3k5	Map3k5	-0.345978	0.407239	0.570296	0.15511	0.144	0.0364	0.003	0.1998	0.91959	1	0.786775	0.82585	0.673479	0.89313	1.072e-05	2.001e-05	3.66
[K].EQGAGSHSDA.[-]	1xTMT6plex [N-Term]; 1xPhospho [S6(98.4)]	0.0379287	0.00277048	1	1	1	2	Q61089	Q61089 [700-709]	Q61089 1xPhospho [S705(98.4)]	0	1267.52	Q61089	Frizzled-6 [OS=Mus musculus]	Fzd6	Fzd6	0.19407	0.408568	0.261623	0.0130221	0.895	0.0363	0.0501	0.5677	0.833063	0.874136	1	0.825577	0.72916	0.967863	0.001152	0.01141	1.17
[R].GEHSSTLPASTPSYTSGTSPTSLSSLEEDSDSSPSRR.[Q]	1xTMT6plex [N-Term]; 1xPhospho [S/T/Y]	0.000266707	7.97536e-05	2	3	1	1	O88737; O88778	O88737 [987-1023]; O88778 [972-1008]		1	4106.85	O88737	Protein bassoon [OS=Mus musculus]	Bsn	Bsn	-0.457378	0.408859	0.292534	0.231226	0.0912	0.0363	0.0357	0.0998	0.855034	0.922535	0.67189	0.728412	0.753219	1	1.072e-05	3.506e-05	3.16
[R].NVHSEDFENR.[I]	1xTMT6plex [N-Term]; 1xPhospho [S4(100)]	0.00265325	0.000587017	1	2	1	3	Q9JKL8	Q9JKL8 [95-104]	Q9JKL8 1xPhospho [S98(100)]	0	1555.67	Q9JKL8	Activity-dependent neuroprotector homeobox protein [OS=Rattus norvegicus]	Adnp	Adnp	0.43764	0.415605	0.444821	0.241269	0.2832	0.0346	0.008	0.0907	0.742557	0.738341	1	0.628204	0.542441	0.723539	9.544e-05	0.0006729	2.86
[K].DGDESSPILTSFELVK.[V]	1xTMT6plex [K16]; 1xTMT6plex [N-Term]; 1xPhospho [S5(99)]	0.000981808	7.97536e-05	1	3	2	2	O88763	O88763 [239-254]	O88763 1xPhospho [S243(99)]	0	2275.15	O88763	Phosphatidylinositol 3-kinase catalytic subunit type 3 [OS=Rattus norvegicus]	Pik3c3	Pik3c3	-0.367692	0.430741	0.302802	-0.0315147	0.1299	0.0302	0.0316	0.7259	0.861713	0.915138	0.709252	0.880744	0.741881	1	1.072e-05	0.0001821	2.95
[R].IPHSSSSENIR.[D]	1xTMT6plex [N-Term]; 1xPhospho [S5(99.4)]	2.61005e-05	7.97536e-05	1	3	2	7	Q5SW75-1	Q5SW75-1 [1212-1222]	Q5SW75-1 1xPhospho [S1216(99.4)]	0	1535.74	Q5SW75-1	Protein phosphatase Slingshot homolog 2 [OS=Mus musculus]	Ssh2	Ssh2	0.0507075	0.443924	0.278847	-0.0995675	0.7299	0.0262	0.0407	0.9824	0.771718	0.89188	0.923785	0.826859	0.735132	1	1.072e-05	2.009e-06	3.17
[K].DLSLHK.[N]	1xTMT6plex [K6]; 1xTMT6plex [N-Term]; 1xPhospho [S3(100)]	0.136728	0.00994788	1	1	1	10	P41233	P41233 [2232-2237]	P41233 1xPhospho [S2234(100)]	0	1250.69	P41233	ATP-binding cassette sub-family A member 1 [OS=Mus musculus]	Abca1	Abca1	0.161264	0.445571	0.261498	0.0051493	0.9864	0.0255	0.0502	0.5938	0.815081	0.880215	0.984315	0.812177	0.734294	1	0.003057	0.03785	1.97
[R].SAPGGGNK.[V]	1xTMT6plex [K8]; 1xTMT6plex [N-Term]; 1xPhospho [S1(100)]	0.001298	7.97536e-05	2	3	1	3	Q61937; P13084	Q61937 [143-150]; P13084 [143-150]	Q61937 1xPhospho [S143(100)]; P13084 1xPhospho [S143(100)]	0	1225.63	Q61937	Nucleophosmin [OS=Mus musculus]	Npm1	Npm1	0.837108	0.446433	0.300235	0.147619	0.0193	0.0253	0.0326	0.2139	0.541327	0.559765	1	0.488677	0.454596	0.619463	1.072e-05	0.0002634	2.98
[R].QGSADSYTSRPSDSDVSLEEDR.[E]	1xTMT6plex [N-Term]; 1xPhospho [S3(100)]	0.00339752	0.000710363	1	5	1	1	Q8VGC3	Q8VGC3 [67-88]	Q8VGC3 1xPhospho [S69(100)]	0	2710.17	Q8VGC3	Voltage-dependent L-type calcium channel subunit beta-2 [OS=Rattus norvegicus]	Cacnb2	Cacnb2	0.110661	0.456352	0.346765	-0.188192	0.8782	0.0232	0.0215	0.6981	0.786864	0.926164	1	0.896502	0.728284	0.999256	0.0001283	0.0009232	2.5
[R].VDIITEEMPENALPSDEDDKDPNDPYR.[A]	1xTMT6plex [K20]; 1xTMT6plex [N-Term]; 1xPhospho [S15(100)]	1.26342e-05	3.88506e-05	1	1	1	2	O54774	O54774 [770-796]	O54774 1xPhospho [S784(100)]	1	3655.68	O54774	AP-3 complex subunit delta-1 [OS=Mus musculus]	Ap3d1	Ap3d1	-0.385649	0.460297	0.261129	0.00852482	0.1207	0.0222	0.0504	0.5828	0.813334	0.871053	0.666734	0.808542	0.726836	1	1.413e-05	1.315e-05	4.99
[R].VASPVNK.[S]	1xTMT6plex [K7]; 1xTMT6plex [N-Term]; 1xPhospho [S3(100)]	0.0266421	0.00232722	1	4	1	3	Q8BYJ6	Q8BYJ6 [787-793]	Q8BYJ6 1xPhospho [S789(100)]	0	1252.71	Q8BYJ6	TBC1 domain family member 4 [OS=Mus musculus]	Tbc1d4	Tbc1d4	0.137545	0.465043	0.383132	0.42337	0.9471	0.0217	0.0144	0.0159	1	0.887246	0.975998	0.745681	0.680314	0.939078	0.0009067	0.008231	2.04
[K].LDQTMSALK.[R]	1xTMT6plex [K9]; 1xTMT6plex [N-Term]; 1xPhospho [S6(100)]	0.00193821	0.00046153	1	2	1	1	Q8CI08-1	Q8CI08-1 [174-182]	Q8CI08-1 1xPhospho [S179(100)]	0	1544.82	Q8CI08-1	SLAIN motif-containing protein 2 [OS=Mus musculus]	Slain2	Slain2	0.25478	0.466425	0.425081	0.140833	0.7304	0.0209	0.0093	0.2255	0.794814	0.838115	1	0.720893	0.624225	0.86248	6.971e-05	0.0004473	2.59
[R].EKTPPRPQGQRPEPENR.[G]	1xTMT6plex [K2]; 1xTMT6plex [N-Term]; 1xPhospho [T3(100)]	0.0867921	0.00617685	1	3	1	2	Q568Y3	Q568Y3 [104-120]	Q568Y3 1xPhospho [T106(100)]	1	2554.33	Q568Y3	E3 ubiquitin-protein ligase RNF185 [OS=Rattus norvegicus]	Rnf185	Rnf185	0.341794	0.467519	0.388775	0.269504	0.496	0.0206	0.0137	0.069	0.715717	0.789059	1	0.593762	0.602666	0.833324	0.002034	0.02434	2.4
[R].GSSPQVMPR.[N]	1xOxidation [M7]; 1xTMT6plex [N-Term]; 1xPhospho [S3(99)]	0.00555736	0.000816232	1	1	2	4	Q5U2P2	Q5U2P2 [376-384]	Q5U2P2 1xPhospho [S378(99)]	0	1283.6	Q5U2P2	Immunoglobulin superfamily member 11 [OS=Rattus norvegicus]	Igsf11	Igsf11	0.28104	0.483158	0.269842	-0.0888206	0.6551	0.0181	0.0447	0.9391	0.779523	0.822997	1	0.829023	0.682603	0.954142	0.000198	0.001666	2.26
[R].TLPSTSSSGSK.[R]	1xTMT6plex [K11]; 1xTMT6plex [N-Term]; 1xPhospho [S4(100)]	0.001298	7.97536e-05	1	5	4	4	P70255-1	P70255-1 [270-280]	P70255-1 1xPhospho [S273(100)]	0	1589.82	P70255-1	Nuclear factor 1 C-type [OS=Mus musculus]	Nfic	Nfic	0.588717	0.48632	0.313162	0.10251	0.0893	0.0176	0.0293	0.306	0.636229	0.664934	1	0.592591	0.535189	0.749729	1.072e-05	0.0002637	2.26
[K].QQQQHGSPTR.[G]	1xTMT6plex [N-Term]; 1xPhospho [S7(100)]	0.000226932	7.97536e-05	1	1	2	9	Q3U3E2	Q3U3E2 [45-54]	Q3U3E2 1xPhospho [S51(100)]	0	1475.7	Q3U3E2	Protein FAM117B [OS=Mus musculus]	Fam117b	Fam117b	0.276607	0.496761	0.326268	0.12231	0.669	0.0167	0.0256	0.2614	0.730441	0.82553	1	0.671068	0.658441	0.929087	1.072e-05	2.874e-05	3.31
[K].IIAPSPVK.[S]	1xTMT6plex [K8]; 1xTMT6plex [N-Term]; 1xPhospho [S5(100)]	0.0276334	0.0024765	1	1	1	4	P52963	P52963 [385-392]	P52963 1xPhospho [S389(100)]	0	1362.82	P52963	band 4.1-like protein 4A [OS=Mus musculus]	Epb4.1l4a; Epb41l4a	Epb41l4a	0.0344138	0.497519	0.320517	0.0916869	0.6917	0.0165	0.0271	0.3329	0.914306	0.884539	0.905892	0.858007	0.708324	1	0.0009448	0.00849	2.03
[R].LHIPPALTENDRDSQSPLK.[N]	1xTMT6plex [K19]; 1xTMT6plex [N-Term]; 1xPhospho [S16(99.1)]	0.0007678	7.97536e-05	1	1	2	7	Q9Z1A9	Q9Z1A9 [922-940]	Q9Z1A9 1xPhospho [S937(99.1)]	1	2669.41	Q9Z1A9	TBC1 domain family member 8 [OS=Mus musculus]	Tbc1d8	Tbc1d8	0.0199991	0.502113	0.398525	0.478702	0.6546	0.016	0.0116	0.0099	1	0.880772	0.893066	0.717623	0.668183	0.946339	1.072e-05	0.0001331	3.22
[K].LTNTSFTEIEK.[Q]	1xTMT6plex [K11]; 1xTMT6plex [N-Term]; 1xPhospho [T4(99.3)]	0.00369527	0.000710363	1	2	2	3	Q4KLN7	Q4KLN7 [238-248]	Q4KLN7 1xPhospho [T241(99.3)]	0	1820.94	Q4KLN7	ADP-ribosylation factor GTPase-activating protein 3 [OS=Rattus norvegicus]	Arfgap3	Arfgap3	0.0734383	0.502113	0.398525	0.173109	0.7857	0.0161	0.0117	0.1702	0.976604	0.930715	0.979318	0.866179	0.706072	1	0.000135	0.001021	2.32
[K].LVGTPNPSTPLPNTVPQFIAR.[E]	1xTMT6plex [N-Term]; 1xPhospho [S/T]	9.00336e-05	7.97536e-05	1	2	1	1	Q9WVB0	Q9WVB0 [110-130]		0	2528.35	Q9WVB0	RNA-binding protein with multiple splicing [OS=Mus musculus]	Rbpms	Rbpms	-0.201871	0.505477	0.290019	-0.115755	0.2722	0.0154	0.037	0.953	0.785716	0.861272	0.748809	0.851356	0.704427	1	1.072e-05	9.158e-06	3.49
[K].GDMSDEDDENEFFDAPEIITMPENLGHK.[R]	1xTMT6plex [K28]; 1xTMT6plex [N-Term]; 1xPhospho [S4(100)]	0.000637151	0.000120904	1	2	1	1	Q3B7Z2	Q3B7Z2 [346-373]	Q3B7Z2 1xPhospho [S349(100)]	0	3733.63	Q3B7Z2	Oxysterol-binding protein 1 [OS=Mus musculus]	Osbp	Osbp	-0.432522	0.507799	0.304099	0.248948	0.0994	0.0152	0.0313	0.0836	0.844544	0.868321	0.643396	0.710692	0.703295	1	9.234e-05	0.0003	6.1
[R].HGSSPSTGASSR.[V]	1xTMT6plex [N-Term]; 1xPhospho [S3(100)]	0.000185124	7.97536e-05	1	1	3	5	Q6NS60	Q6NS60 [393-404]	Q6NS60 1xPhospho [S395(100)]	0	1439.65	Q6NS60	F-box only protein 41 [OS=Mus musculus]	Fbxo41	Fbxo41	0.119129	0.50819	0.330205	-0.0201355	0.8984	0.0151	0.0247	0.6844	0.827706	0.883936	0.960025	0.839339	0.703104	1	1.072e-05	2.227e-05	2.79
[R].RSQQGPR.[K]	1xTMT6plex [N-Term]; 1xPhospho [S2(100)]	0.0459204	0.0033417	1	2	1	4	Q6NZJ6	Q6NZJ6 [707-713]	Q6NZJ6 1xPhospho [S708(100)]	1	1137.57	Q6NZJ6	eukaryotic translation initiation factor 4 gamma 1 [OS=Mus musculus]	Eif4g1	Eif4g1	0.0152731	0.509356	0.398094	0.26273	0.6424	0.0148	0.0121	0.0738	0.993896	0.925778	0.93563	0.828421	0.702536	1	0.001293	0.01356	1.95
[K].NMQLSNTPDSGISLLHK.[K]	1xTMT6plex [K17]; 1xTMT6plex [N-Term]; 1xPhospho [T7(100)]	9.61048e-05	7.97536e-05	1	2	2	2	Q9Z0R6-1	Q9Z0R6-1 [568-584]	Q9Z0R6-1 1xPhospho [T574(100)]	0	2393.23	Q9Z0R6-1	Intersectin-2 [OS=Mus musculus]	Itsn2	Itsn2	0.607228	0.540302	0.262787	0.268993	0.0772	0.0122	0.0497	0.0692	0.77479	0.656457	1	0.642997	0.547141	0.795695	1.072e-05	9.91e-06	2.96
[K].TPTPLMANDSTETSEAGEEEEDHEGDSENK.[E]	1xOxidation [M6]; 1xTMT6plex [K30]; 1xTMT6plex [N-Term]; 1xPhospho [S/T]	6.67935e-05	7.97536e-05	1	1	1	2	Q80TB8	Q80TB8 [381-410]		0	3803.6	Q80TB8	Synaptic vesicle membrane protein VAT-1 homolog-like [OS=Mus musculus]	Vat1l	Vat1l	-0.148494	0.560855	0.256293	0.193219	0.3408	0.0103	0.0533	0.1419	0.80969	0.809688	0.730494	0.708196	0.6779	1	1.072e-05	6.363e-06	3.56
[R].ASQAEAANS.[-]	1xTMT6plex [N-Term]; 1xPhospho [S9(100)]	0.00079899	7.97536e-05	1	1	1	4	Q8K1N4-1	Q8K1N4-1 [537-545]	Q8K1N4-1 1xPhospho [S545(100)]	0	1157.5	Q8K1N4-1	Spermatogenesis-associated serine-rich protein 2 [OS=Mus musculus]	Spats2	Spats2	0.656162	0.564144	0.474039	0.18224	0.0532	0.0097	0.0062	0.1563	0.646263	0.634564	1	0.569573	0.456852	0.67546	1.072e-05	0.0001397	2.32
[R].TLSDPPSPLPHGPPNK.[G]	1xTMT6plex [K16]; 1xTMT6plex [N-Term]; 1xPhospho [S3(99.3)]	7.27068e-06	7.97536e-05	1	4	1	1	Q9QWY8	Q9QWY8 [852-867]	Q9QWY8 1xPhospho [S854(99.3)]	0	2192.15	Q9QWY8	Arf-GAP with SH3 domain, ANK repeat and PH domain-containing protein 1 [OS=Mus musculus]	Asap1	Asap1	-0.351228	0.56489	0.479716	0.154933	0.1411	0.0096	0.0059	0.2001	0.805506	0.942671	0.738975	0.723484	0.676007	1	1.072e-05	4.176e-07	3.84
[K].AEFTSPPSLFK.[T]	1xTMT6plex [K11]; 1xTMT6plex [N-Term]; 1xPhospho [S5(99.3)]	0.000708799	7.97536e-05	1	4	3	17	Q9D824-1	Q9D824-1 [231-241]	Q9D824-1 1xPhospho [S235(99.3)]	0	1761.92	Q9D824-1	Pre-mRNA 3'-end-processing factor FIP1 [OS=Mus musculus]	Fip1l1	Fip1l1	0.18237	0.568676	0.653398	0.17875	0.9281	0.0092	0.0011	0.1621	0.762644	0.881254	1	0.673772	0.560285	0.830993	1.072e-05	0.0001196	2.92
[K].GSPGGDLGAK.[K]	1xTMT6plex [K10]; 1xTMT6plex [N-Term]; 1xPhospho [S2(100)]	0.0806	0.00611168	1	1	1	1	O70311	O70311 [37-46]	O70311 1xPhospho [S38(100)]	0	1396.72	O70311	Glycylpeptide N-tetradecanoyltransferase 2 [OS=Mus musculus]	Nmt2	Nmt2	-0.127648	0.576045	0.373821	0.318185	0.373	0.0084	0.0154	0.0444	0.931987	0.86921	0.795607	0.747526	0.6708	1	0.002552	0.03739	3.46
[R].ELLSNDTPENTLK.[H]	1xTMT6plex [K13]; 1xTMT6plex [N-Term]; 1xPhospho [T7(100)]	0.00041234	7.97536e-05	1	2	1	1	Q925B3-1	Q925B3-1 [1460-1472]	Q925B3-1 1xPhospho [T1466(100)]	0	2012.04	Q925B3-1	Transient receptor potential cation channel subfamily M member 7 [OS=Rattus norvegicus]	Trpm7	Trpm7	-0.33245	0.58135	0.265866	0.00944199	0.1505	0.0075	0.0479	0.5795	0.72811	0.803581	0.638194	0.72336	0.668338	1	1.072e-05	6.047e-05	3.54
[K].RSSPLPAK.[C]	1xTMT6plex [K8]; 1xTMT6plex [N-Term]; 1xPhospho [S3(99.4)]	0.00363021	0.000710363	1	1	1	4	Q80TT2	Q80TT2 [213-220]	Q80TT2 1xPhospho [S215(99.4)]	1	1393.8	Q80TT2	BAI1-associated protein 3 [OS=Mus musculus]	Baiap3	Baiap3	0.374416	0.587168	0.48418	0.500823	0.4161	0.0068	0.0058	0.0079	0.863617	0.771418	1	0.610321	0.551489	0.828499	0.000135	0.0009991	2.76
[K].HESQQDYAK.[G]	1xTMT6plex [K9]; 1xTMT6plex [N-Term]; 1xPhospho [S3(100)]	0.0984295	0.00710735	1	1	1	1	Q60598	Q60598 [296-304]	Q60598 1xPhospho [S298(100)]	0	1643.78	Q60598	Src substrate cortactin [OS=Mus musculus]	Cttn	Cttn	0.604002	0.596073	0.390604	0.256805	0.0789	0.0063	0.0135	0.0772	0.62218	0.657926	1	0.520727	0.501873	0.758629	0.002274	0.02747	1.75
[K].ALVPTPGKK.[G]	2xTMT6plex [K8; K9]; 1xTMT6plex [N-Term]; 1xPhospho [T5(100)]	0.0450436	0.00328791	1	2	1	2	P13383	P13383 [117-125]	P13383 1xPhospho [T121(100)]	1	1678.03	P13383	Nucleolin [OS=Rattus norvegicus]	Ncl	Ncl	1.12459	0.622948	0.398427	0.278672	0.0055	0.0048	0.0118	0.0628	0.445368	0.458633	1	0.367139	0.347958	0.535862	0.001281	0.01331	2.21
[R].DASQHSHSK.[I]	1xTMT6plex [K9]; 1xTMT6plex [N-Term]; 1xPhospho [S8(100)]	0.00159011	0.00046153	1	1	1	2	Q148W0	Q148W0 [481-489]	Q148W0 1xPhospho [S488(100)]	0	1534.74	Q148W0	Phospholipid-transporting ATPase IC [OS=Mus musculus]	Atp8b1	Atp8b1	-0.146087	0.63219	0.348677	0.195091	0.3451	0.0046	0.0211	0.1396	0.822507	0.821588	0.742468	0.718475	0.645196	1	6.971e-05	0.0003442	2.58
[K].ITKPGSIDSNNQLFAPGGR.[L]	1xTMT6plex [K3]; 1xTMT6plex [N-Term]; 1xPhospho [S6(100)]	1.51046e-07	7.97536e-05	1	2	2	5	Q6NZJ6	Q6NZJ6 [1076-1094]	Q6NZJ6 1xPhospho [S1081(100)]	0	2510.32	Q6NZJ6	eukaryotic translation initiation factor 4 gamma 1 [OS=Mus musculus]	Eif4g1	Eif4g1	0.251607	0.632422	0.475537	0.287221	0.7404	0.0045	0.0061	0.0585	0.740728	0.83996	1	0.607011	0.604099	0.936452	1.072e-05	3.619e-09	5.74
[R].RDSLDK.[S]	1xTMT6plex [K6]; 1xTMT6plex [N-Term]; 1xPhospho [S3(100)]	0.013502	0.00128835	2	5	1	79	Q8VHQ7-1; Q9R0Q1-1	Q8VHQ7-1 [215-220]; Q9R0Q1-1 [216-221]	Q8VHQ7-1 1xPhospho [S217(100)]; Q9R0Q1-1 1xPhospho [S218(100)]	1	1271.68	Q8VHQ7-1	Synaptotagmin-like protein 4 [OS=Rattus norvegicus]	Sytl4	Sytl4	-0.312387	0.648582	0.297163	0.0865509	0.1647	0.0037	0.0338	0.3461	0.717894	0.783813	0.631211	0.676092	0.637907	1	0.0004638	0.004283	3.1
[K].TIGGGDDSFNTFFSETGAGK.[H]	1xTMT6plex [K20]; 1xTMT6plex [N-Term]; 1xPhospho [S8(100)]	2.39625e-08	7.97536e-05	2	5	3	21	P05213; P68373	P05213 [41-60]; P68373 [41-60]	P05213 1xPhospho [S48(100)]; P68373 1xPhospho [S48(100)]	0	2546.19	P05213	Tubulin alpha-1B chain [OS=Mus musculus]	Tuba1b	Tuba1b	0.548732	0.654543	0.467921	0.535353	0.1215	0.0035	0.0068	0.0059	0.770849	0.683621	1	0.531878	0.494262	0.778026	1.072e-05	3.802e-10	4.39
[R].ESDIPASV.[-]	1xTMT6plex [N-Term]; 1xPhospho [S7(100)]	0.00862475	0.00109238	1	2	1	3	Q61239	Q61239 [370-377]	Q61239 1xPhospho [S376(100)]	0	1126.52	Q61239	protein farnesyltransferase/geranylgeranyltransferase type-1 subunit alpha [OS=Mus musculus]	Fnta	Fnta	-0.0842784	0.663141	0.317579	0.0427748	0.4461	0.0031	0.028	0.4708	0.792845	0.787002	0.742344	0.769683	0.631502	1	0.0003256	0.002701	2.28
[R].DLESASR.[T]	1xTMT6plex [N-Term]; 1xPhospho [S4(100)]	0.129775	0.00933521	1	4	1	1	Q6ZWR6-4	Q6ZWR6-4 [8296-8302]	Q6ZWR6-4 1xPhospho [S8299(100)]	0	1086.5	Q6ZWR6-4	Isoform 4 of Nesprin-1 [OS=Mus musculus]	Syne1	Syne1	-0.150018	0.696589	0.313811	-0.0530811	0.3388	0.0023	0.0291	0.8019	0.650804	0.766959	0.691214	0.675195	0.617029	1	0.002892	0.03588	1.69
[K].VRPSSDLSNSTGQSPHHK.[G]	1xTMT6plex [K18]; 1xTMT6plex [N-Term]; 1xPhospho [S14(99.9)]	0.00581417	0.000549729	1	1	1	1	Q8VHF0	Q8VHF0 [387-404]	Q8VHF0 1xPhospho [S400(99.9)]	0	2472.24	Q8VHF0	MAP/microtubule affinity-regulating kinase 3 [OS=Rattus norvegicus]	Mark3	Mark3	-0.379599	0.774777	0.383525	0.0730036	0.1236	0.0012	0.0143	0.3815	0.744276	0.762468	0.586072	0.707551	0.584479	1	0.0002445	0.001829	3.09
[K].QFILANHEGSTPGK.[V]	1xTMT6plex [K14]; 1xTMT6plex [N-Term]; 1xPhospho [T11(99.1)]	0.00133149	0.000161714	1	3	1	2	Q505F1	Q505F1 [43-56]	Q505F1 1xPhospho [T53(99.1)]	0	2037.06	Q505F1	Nuclear receptor subfamily 2 group C member 1 [OS=Mus musculus]	Nr2c1	Nr2c1	0.372164	0.777292	0.285601	0.268255	0.4206	0.0011	0.0383	0.0698	0.701066	0.711191	0.92049	0.582111	0.583461	1	2.12e-05	0.0002721	2.5
[K].HIDDTSQMDLFHRDSDDDQVEEQLDETEAK.[W]	1xOxidation [M8]; 1xTMT6plex [K30]; 1xTMT6plex [N-Term]; 1xPhospho [S15(100)]	1.69402e-06	7.97536e-05	1	1	2	5	Q80YR7	Q80YR7 [1119-1148]	Q80YR7 1xPhospho [S1133(100)]	1	4115.81	Q80YR7	Claspin [OS=Mus musculus]	Clspn	Clspn	0.957017	0.997437	0.443469	0.176393	0.0099	0.0004	0.0082	0.1651	0.437326	0.515121	1	0.386995	0.378802	0.756259	1.072e-05	7.012e-08	3.84
